# Supplementary material for: Nickel-catalysed enantioselective alkene dicarbofunctionalization enabled by photochemical aliphatic C–H bond activation
Source: PubMed Central journal article supplement (PMC11208155; doi:10.1038/s41929-024-01153-0), 2024-04-29
Supplement: 41929_2024_1153_MOESM1_ESM.pdf [file 41929_2024_1153_MOESM1_ESM.pdf]

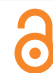

---

# Nickel-catalysed enantioselective alkene dicarbofunctionalization enabled by photochemical aliphatic C–H bond activation

---

In the format provided by the authors and unedited

# Supplementary Information

## Contents

|                                                                                    |     |
|------------------------------------------------------------------------------------|-----|
| <b>Supplementary Methods</b> .....                                                 | 2   |
| General Information.....                                                           | 2   |
| Experimental Procedures for the Asymmetric Alkene Dicarbofunctionalization.....    | 2   |
| Characterization Data of Asymmetric Alkene Dicarbofunctionalization Products ..... | 3   |
| Experimental Procedures and Characterization Data for Synthetic Applications.....  | 78  |
| Experimental Procedures for Radical Trapping Experiment .....                      | 89  |
| Experimental Procedures for Radical Clock Experiment .....                         | 89  |
| Synthesis and Characterization of Aryl–Ni(II) Bromide Complex <b>90</b> .....      | 90  |
| Stoichiometric Experiment with Aryl–Ni(II) Bromide Complex <b>90</b> .....         | 90  |
| Catalytic Experiment with Aryl–Ni(II) Bromide Complex <b>90</b> .....              | 91  |
| General Procedures for Laser Flash Photolysis .....                                | 91  |
| General Procedures for Cyclic Voltammetry Studies .....                            | 92  |
| General Procedures for X-Ray Diffraction Analysis of Compound <b>1</b> .....       | 92  |
| <b>Supplementary Discussion</b> .....                                              | 94  |
| <b>Supplementary Tables</b> .....                                                  | 96  |
| <b>Supplementary Figures</b> .....                                                 | 106 |
| <b>Supplementary References</b> .....                                              | 203 |

## Supplementary Methods

### General Information

Unless otherwise stated, reactions were carried out using dry solvents under a nitrogen atmosphere. Starting materials were purchased from Aldrich, Fluka and TCI. Conversion was monitored by thin layer chromatography (TLC) using Merck TLC silica gel 60 F254 and visualized by UV light at 254 nm. Flash column chromatography was performed over silica gel (230-400 mesh). Photochemical experiments have been performed using 40 W Kessil® PR160 390nm lamp. All NMR spectra were recorded on AV2-400 Bruker spectrometers. Chemical shifts are given in ppm and the spectra are calibrated using the residual chloroform signals (7.26 ppm for  $^1\text{H}$  NMR and 77.0 ppm for  $^{13}\text{C}$  NMR) and the residual dichloromethane signals (2.05 ppm for  $^1\text{H}$  NMR and 29.84 ppm, for  $^{13}\text{C}$  NMR). Multiplicities are abbreviated as follows: singlet (s), doublet (d), triplet (t), quartet (q), doublet-doublet (dd), septet (sept), multiplet (m), and broad (b). Infrared spectra were recorded on a JASCO FT/IR - 4100 spectrometer. Absorptions are reported in wavenumber ( $\text{cm}^{-1}$ ). High-resolution electrospray ionization and electron impact mass spectrometry was performed on a Finnigan MAT 900 (Thermo Finnigan, San Jose, CA; USA) double focusing magnetic sector mass spectrometer. Ten spectra were acquired. A mass accuracy  $\leq 2$  ppm was obtained in the peak matching acquisition mode by using a solution containing 2  $\mu\text{L}$  PEG200, 2  $\mu\text{L}$  PPG450, and 1.5 mg NaOAc (all obtained from Sigma-Aldrich, CH-Buchs) dissolved in 100 mL of MeOH (HPLC Supra grade, Scharlau, E-Barcelona) as internal standard. Melting points were measured on melting point operators: MPM-MHV from Müller + Krempel AG. The enantiomeric ratios were determined by chiral HPLC analysis performed on JASCO HPLC system equipped with a PU-980 pump, a UV-970 detector, measured on a chiral column. Optical rotations were measured on a JASCO P-1010 polarimeter.

### Experimental Procedures for the Asymmetric Alkene Dicarbofunctionalization

#### General Procedure A (GP-A):

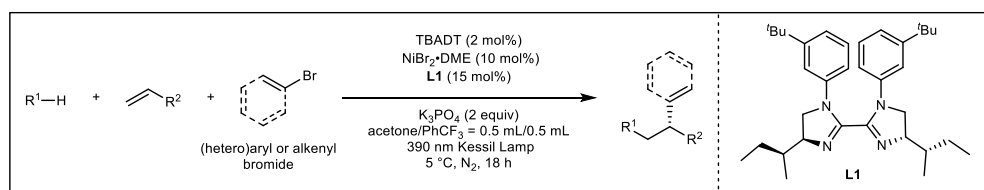

**GP-A:** In a nitrogen-filled glove box, a reaction vial (5 mL) equipped with a stirring bar was charged with tetrabutylammonium decatungstate (TBADT, 0.004 mmol, 2 mol%), NiBr<sub>2</sub>·DME (0.02 mmol, 10 mol%), (4*S*,4'*S*)-4,4'-di((*S*)-*sec*-butyl)-1,1'-bis(3-(*tert*-butyl)phenyl)-4,4',5,5'-tetrahydro-1*H*,1'*H*-2,2'-biimidazole (**L1**, 0.03 mmol, 15 mol%), anhydrous K<sub>3</sub>PO<sub>4</sub> (0.4 mmol, 2 equiv), aryl bromide (0.2 mmol, 1 equiv), C-H radical precursor (2 mmol, 10 equiv), alkene (0.6 mmol, 3 equiv), dry acetone (0.5 mL), and dry  $\alpha,\alpha,\alpha$ -trifluorotoluene (0.5 mL). The vial was sealed and removed from the glovebox. The reaction mixture was pre-stirred for 20 min, then irradiated with a Kessil® PR160-390nm lamp at 5 °C with a distance of ~3 cm from the surface of the reaction vial. After 18 h of irradiation, the resulting mixture was passed through a pipette plug of Celite/silica gel and eluted with EtOAc. After concentration under reduced pressure, the crude mixture was purified by chromatography on silica gel with hexane: EtOAc mixtures to give the corresponding products.

### General Procedure B (GP-B):

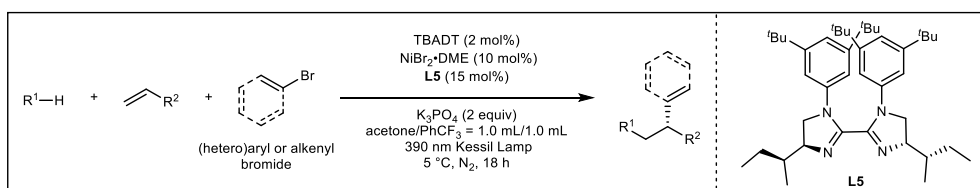

**GP-B:** In a nitrogen-filled glove box, a reaction vial (5 mL) equipped with a stirring bar was charged with tetrabutylammonium decatungstate (TBADT, 0.004 mmol, 2 mol%),  $NiBr_2 \cdot DME$  (0.02 mmol, 10 mol%), (4*S*,4'*S*)-4,4'-di((*S*)-*sec*-butyl)-1,1'-bis(3,5-di-*tert*-butylphenyl)-4,4',5,5'-tetrahydro-1*H*,1'*H*-2,2'-biimidazole (**L5**, 0.03 mmol, 15 mol%), anhydrous  $K_3PO_4$  (0.4 mmol, 2 equiv), aryl bromide (0.2 mmol, 1 equiv), C-H radical precursor (2 mmol, 10 equiv), alkene (0.6 mmol, 3 equiv), dry acetone (1.0 mL), and dry  $\alpha,\alpha,\alpha$ -trifluorotoluene (1.0 mL). The vial was sealed and removed from the glovebox. The reaction mixture was pre-stirred for 20 min, then irradiated with a Kessil® PR160-390nm lamp at 5 °C with a distance of ~3 cm from the surface of the reaction vial. After 18 h of irradiation, the resulting mixture was passed through a pipette plug of Celite/silica gel and eluted with EtOAc. After concentration under reduced pressure, the crude mixture was purified by chromatography on silica gel with hexane: EtOAc mixtures to give the corresponding products.

### General Procedure C (GP-C):

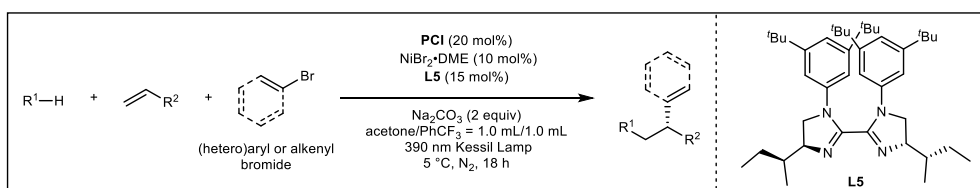

**GP-C:** In a nitrogen-filled glove box, a reaction vial (5 mL) equipped with a stirring bar was charged with (4-methoxyphenyl)(4-(trifluoromethyl)phenyl)methanone (**PCI**, 0.04 mmol, 20 mol%),  $NiBr_2 \cdot DME$  (0.02 mmol, 10 mol%), (4*S*,4'*S*)-4,4'-di((*S*)-*sec*-butyl)-1,1'-bis(3,5-di-*tert*-butylphenyl)-4,4',5,5'-tetrahydro-1*H*,1'*H*-2,2'-biimidazole (**L5**, 0.03 mmol, 15 mol%), anhydrous  $Na_2CO_3$  (0.4 mmol, 2 equiv), aryl bromide (0.2 mmol, 1 equiv), C-H radical precursor (2 mmol, 10 equiv), alkene (0.6 mmol, 3 equiv), dry acetone (1.0 mL), and dry  $\alpha,\alpha,\alpha$ -trifluorotoluene (1.0 mL). The vial was sealed and removed from the glovebox. The reaction mixture was pre-stirred for 20 min, then irradiated with a Kessil® PR160-390nm lamp at 5 °C with a distance of ~3 cm from the surface of the reaction vial. After 18 h of irradiation, the resulting mixture was passed through a pipette plug of Celite/silica gel and eluted with EtOAc. After concentration under reduced pressure, the crude mixture was purified by chromatography on silica gel with hexane: EtOAc mixtures to give the corresponding products.

### Characterization Data of Asymmetric Alkene Dicarbofunctionalization Products

#### *tert*-Butyl (*R*)-2-(4-cyanophenyl)-3-cyclohexylpropanoate (**1**)

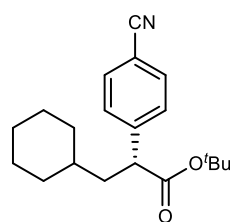

Prepared by **GP-A**. White solid, 50.4 mg, 80% yield. m.p. = 89-90 °C;  $^1H$  NMR (400 MHz,  $CDCl_3$ )  $\delta$  7.62 – 7.56 (m, 2H), 7.43 – 7.37 (m, 2H), 3.62 (t, 1H,  $J$  = 8 Hz), 1.92 (ddd,  $J$  = 13.8, 8.3, 7.1 Hz, 1H), 1.75 – 1.52 (m, 6H), 1.37 (s, 9H), 1.18 – 1.04 (m, 4H), 0.99 – 0.80 (m, 2H);  $^{13}C$  NMR (101 MHz,  $CDCl_3$ )  $\delta$  172.3, 145.4, 132.2, 128.7, 118.8, 110.8, 81.1, 50.0, 40.9, 35.4, 33.1, 32.9, 27.8, 26.3, 26.04, 26.01. IR (film):  $\nu$  ( $cm^{-1}$ ) 2982, 2916, 2848, 2230, 1718, 1605, 1505, 1449, 1366, 1355, 1347, 1337, 1216, 1175, 1142, 1085, 1023, 973, 902,

894, 875, 864, 842, 836, 759, 697, 574, 552, 485; HR-MS (ESI)  $m/z$  calcd for  $C_{20}H_{27}NNaO_2^+$   $[M+Na^+]$  336.19340, found 336.19286;  $[\alpha]_D^{22.1} = -18.2$  ( $c = 0.1$ ,  $CHCl_3$ ); HPLC conditions: IC column, hexane/2-propanol = 99/1, flow rate = 0.5 mL/min,  $\lambda = 230$  nm,  $t_R = 32.2$  min (minor),  $t_R = 34.2$  min (major), 96:4 er.

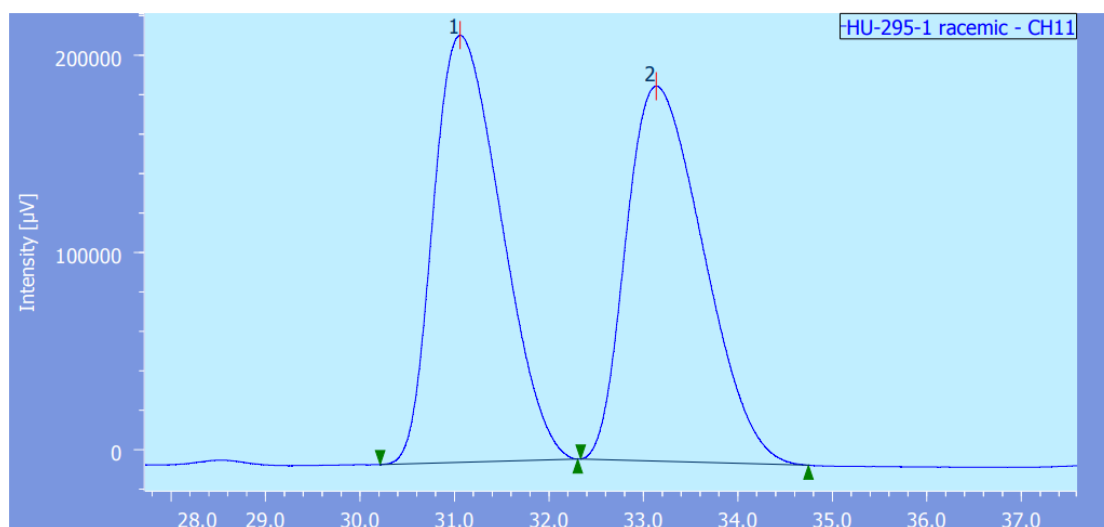

Decision

| # | Peak Name | CH | tR [min] | Area [µV·sec] | Height [µV] | Area%  | Height% | Quantity | NTP  | Resolution | Symmetry Factor | Warning |
|---|-----------|----|----------|---------------|-------------|--------|---------|----------|------|------------|-----------------|---------|
| 1 | Unknown   | 11 | 31.060   | 10801689      | 216355      | 49.966 | 53.255  | N/A      | 8278 | 1.424      | 1.358           |         |
| 2 | Unknown   | 11 | 33.133   | 10816347      | 189905      | 50.034 | 46.745  | N/A      | 7270 | N/A        | 1.404           |         |

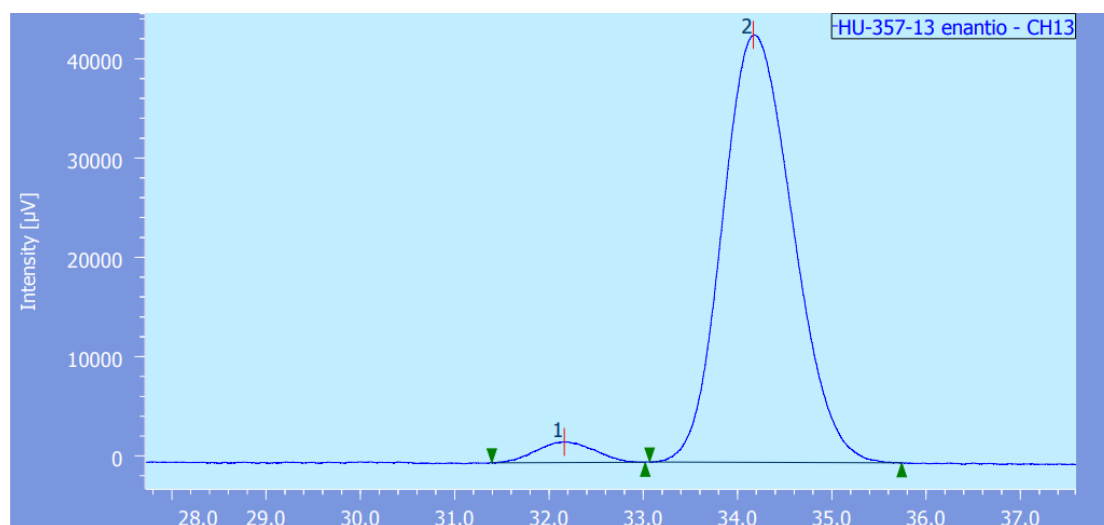

Decision

| # | Peak Name | CH | tR [min] | Area [µV·sec] | Height [µV] | Area%  | Height% | Quantity | NTP   | Resolution | Symmetry Factor | Warning |
|---|-----------|----|----------|---------------|-------------|--------|---------|----------|-------|------------|-----------------|---------|
| 1 | Unknown   | 13 | 32.160   | 89819         | 2069        | 3.866  | 4.590   | N/A      | 11236 | 1.547      | 1.003           |         |
| 2 | Unknown   | 13 | 34.167   | 2233527       | 43006       | 96.134 | 95.410  | N/A      | 9694  | N/A        | 1.165           |         |

### *tert*-Butyl (*R*)-2-(4-cyanophenyl)-4-hydroxy-4-methylpentanoate (**2**)

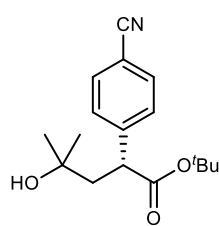

Prepared by GP-C. White solid, 49.4 mg, 85% yield. m.p. = 106-107 °C;  $^1H$  NMR (400 MHz,  $CDCl_3$ )  $\delta$  7.62 – 7.57 (m, 2H), 7.44 – 7.38 (d,  $J = 8.2$  Hz, 2H), 3.79 (dd,  $J = 9.9, 3.2$  Hz, 1H), 2.51 (dd,  $J = 14.3, 9.9$  Hz, 1H), 1.69 (dd,  $J = 14.3, 3.2$  Hz, 1H), 1.37 (s, 9H), 1.26 (s, 3H), 1.24 (s, 3H);  $^{13}C$  NMR (101 MHz,  $CDCl_3$ )  $\delta$  172.9, 146.3, 132.4, 128.5, 118.7, 110.9, 81.5, 70.4, 48.6, 46.4, 30.3, 29.0, 27.8. IR (film):  $\nu$  ( $cm^{-1}$ ) 3517, 2976, 2924, 2874, 2230, 1724, 1604, 1392, 1366, 1340, 1252, 1215, 1143, 842, 755, 567; HR-MS (ESI)  $m/z$  calcd for

$C_{17}H_{23}NNaO_3^+$   $[M+Na^+]$  312.15701, found 312.15684;  $[\alpha]_D^{24.0} = -23.8$  ( $c = 0.1$ ,  $CHCl_3$ ); HPLC conditions: IC column, hexane/2-propanol = 90/10, flow rate = 0.5 mL/min,  $\lambda = 250$  nm,  $t_R = 18.3$  min (minor),  $t_R = 20.2$  min (major), 96:4 er.

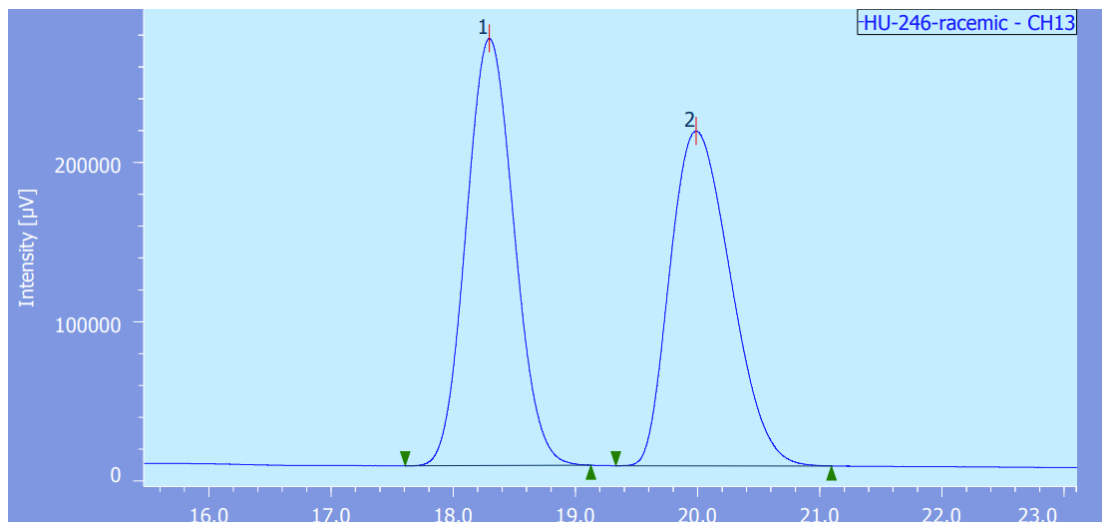

Decision

| # | Peak Name | CH | tR [min] | Area [ $\mu V \cdot sec$ ] | Height [ $\mu V$ ] | Area%  | Height% | Quantity | NTP   | Resolution | Symmetry Factor | Warning |
|---|-----------|----|----------|----------------------------|--------------------|--------|---------|----------|-------|------------|-----------------|---------|
| 1 | Unknown   | 13 | 18.293   | 7309764                    | 268165             | 50.192 | 56.059  | N/A      | 10126 | 2.038      | 1.090           |         |
| 2 | Unknown   | 13 | 19.987   | 7253824                    | 210198             | 49.808 | 43.941  | N/A      | 7246  | N/A        | 1.289           |         |

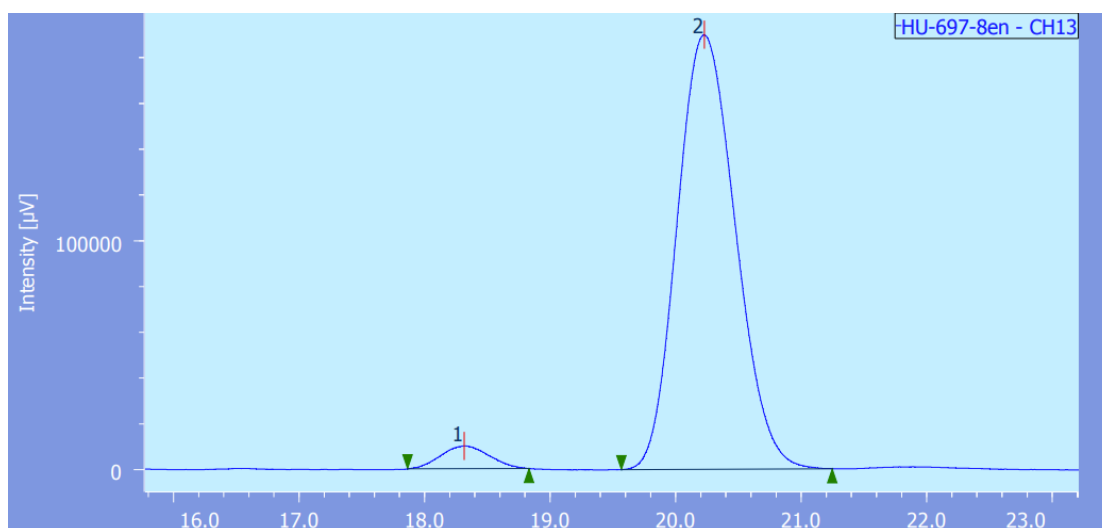

Decision

| # | Peak Name | CH | tR [min] | Area [ $\mu V \cdot sec$ ] | Height [ $\mu V$ ] | Area%  | Height% | Quantity | NTP  | Resolution | Symmetry Factor | Warning |
|---|-----------|----|----------|----------------------------|--------------------|--------|---------|----------|------|------------|-----------------|---------|
| 1 | Unknown   | 13 | 18.313   | 268330                     | 9944               | 4.199  | 4.981   | N/A      | 9894 | 2.394      | 1.068           |         |
| 2 | Unknown   | 13 | 20.227   | 6121265                    | 189683             | 95.801 | 95.019  | N/A      | 8729 | N/A        | 1.146           |         |

### *tert*-Butyl (*R*)-3-cyclohexyl-2-(4-(methylsulfonyl)phenyl)propanoate (**3**)

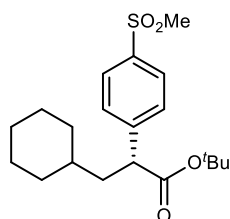

Prepared by **GP-B**. White solid, 62.2 mg, 85% yield. m.p. = 82-83 °C;  $^1H$  NMR (400 MHz,  $CDCl_3$ )  $\delta$  7.89 – 7.85 (m, 2H), 7.53 – 7.47 (m, 2H), 3.67 (t,  $J = 7.8$  Hz, 1H), 3.05 (s, 3H), 1.94 (ddd,  $J = 13.8, 8.2, 7.2$  Hz, 1H), 1.74 – 1.55 (m, 6H), 1.39 (s, 9H), 1.19 – 1.07 (m, 4H), 0.97 – 0.83 (m, 2H);  $^{13}C$  NMR (101 MHz,  $CH_3CN$ )  $\delta$  172.4, 146.4, 139.0, 128.9, 127.5, 81.2, 49.8, 44.5, 41.1, 35.3, 33.1, 32.9, 27.9, 26.4, 26.05, 26.02. IR (film):  $\nu$  ( $cm^{-1}$ ) 2961, 2921, 2851, 1722, 1596, 1448, 1365, 1306, 1220, 1141, 1090, 961, 835, 788, 776, 758, 742, 724, 572, 550, 540, 529; HR-MS (ESI)  $m/z$  calcd for  $C_{20}H_{30}NaO_4S^+$   $[M+Na^+]$  389.17570, found

389.17564;  $[\alpha]_D^{23.2} = -14.5$  ( $c = 0.1$ ,  $\text{CHCl}_3$ ); HPLC conditions: Chiral-NR column, hexane/2-propanol = 90/10, flow rate = 1.0 mL/min,  $\lambda = 226$  nm,  $t_R = 50.0$  min (minor),  $t_R = 52.9$  min (major), 97:3 er.

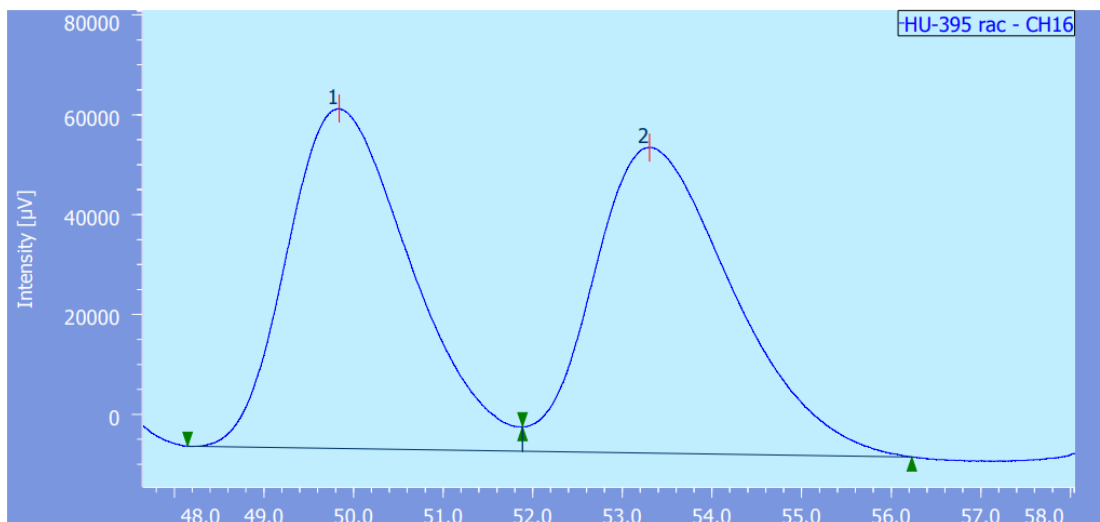

Decision

| # | Peak Name | CH | tR [min] | Area [µV·sec] | Height [µV] | Area%  | Height% | Quantity | NTP  | Resolution | Symmetry Factor | Warning |
|---|-----------|----|----------|---------------|-------------|--------|---------|----------|------|------------|-----------------|---------|
| 1 | Unknown   | 16 | 49.840   | 6536933       | 68025       | 49.605 | 52.650  | N/A      | 6108 | 1.284      | N/A             |         |
| 2 | Unknown   | 16 | 53.300   | 6640997       | 61177       | 50.395 | 47.350  | N/A      | 5579 | N/A        | N/A             |         |

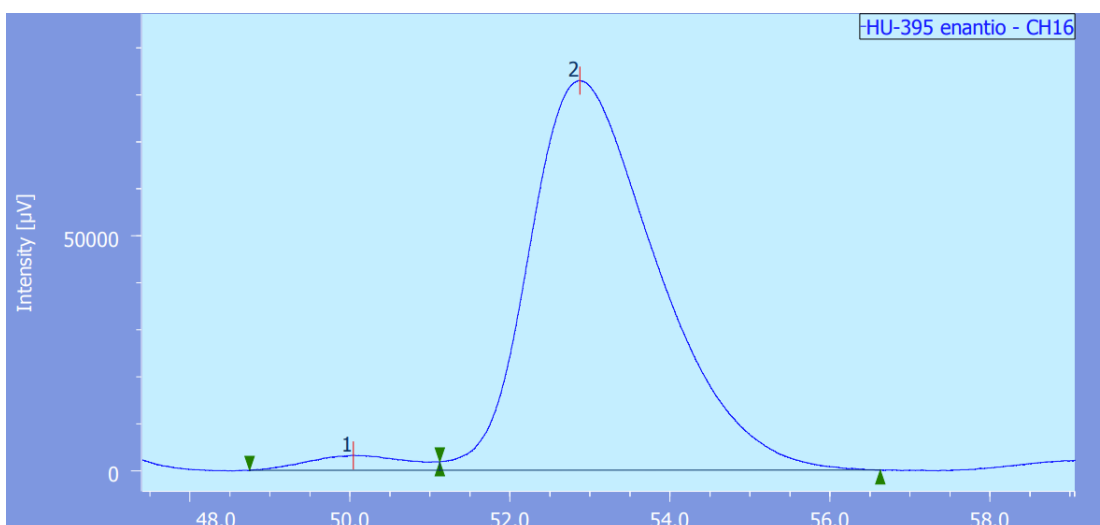

Decision

| # | Peak Name | CH | tR [min] | Area [µV·sec] | Height [µV] | Area%  | Height% | Quantity | NTP  | Resolution | Symmetry Factor | Warning |
|---|-----------|----|----------|---------------|-------------|--------|---------|----------|------|------------|-----------------|---------|
| 1 | Unknown   | 16 | 50.040   | 276894        | 3152        | 2.926  | 3.668   | N/A      | N/A  | N/A        | N/A             |         |
| 2 | Unknown   | 16 | 52.873   | 9185779       | 82785       | 97.074 | 96.332  | N/A      | 5345 | N/A        | 1.394           |         |

#### ***tert*-Butyl (*R*)-3-cyclohexyl-2-(1-oxo-1,3-dihydroisobenzofuran-5-yl)propanoate (4)**

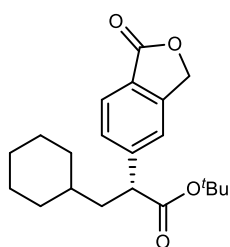

Prepared by **GP-A**. White solid, 46.4 mg, 67% yield. m.p. = 93-94 °C;  $^1\text{H}$  NMR (400 MHz,  $\text{CDCl}_3$ )  $\delta$  7.87 – 7.81 (m, 1H), 7.45 (d,  $J = 7.3$  Hz, 2H), 5.29 (s, 2H), 3.70 (dd,  $J = 8.0, 7.5$  Hz, 1H), 1.96 (ddd,  $J = 13.7, 8.3, 7.1$  Hz, 1H), 1.75 – 1.56 (m, 6H), 1.39 (s, 9H), 1.20 – 1.08 (m, 4H), 0.99 – 0.83 (m, 2H);  $^{13}\text{C}$  NMR (101 MHz,  $\text{CDCl}_3$ )  $\delta$  172.6, 170.8, 147.02, 147.01, 129.2, 125.7, 124.5, 121.3, 81.2, 69.5, 50.2, 41.3, 35.4, 33.1, 33.0, 27.9, 26.4, 26.1, 26.0. IR (film):  $\nu$  ( $\text{cm}^{-1}$ ) 2978, 2960, 2928, 2840, 1756, 1720, 1619, 1448, 1393, 1366, 1347, 1244, 1213, 1147, 1137, 1125, 1049, 1001, 883, 854, 841, 786, 772, 762, 702,

689, 426; HR-MS (ESI)  $m/z$  calcd for  $C_{21}H_{28}NaO_4^+$   $[M+Na^+]$  367.18798, found 367.18786;  $[\alpha]_D^{23.4} = -26.7$  ( $c = 0.1$ ,  $CHCl_3$ ); HPLC conditions: IC column, hexane/2-propanol = 90/10, flow rate = 0.5 mL/min,  $\lambda = 236$  nm,  $t_R = 67.4$  min (minor),  $t_R = 69.6$  min (major), 97:3 er.

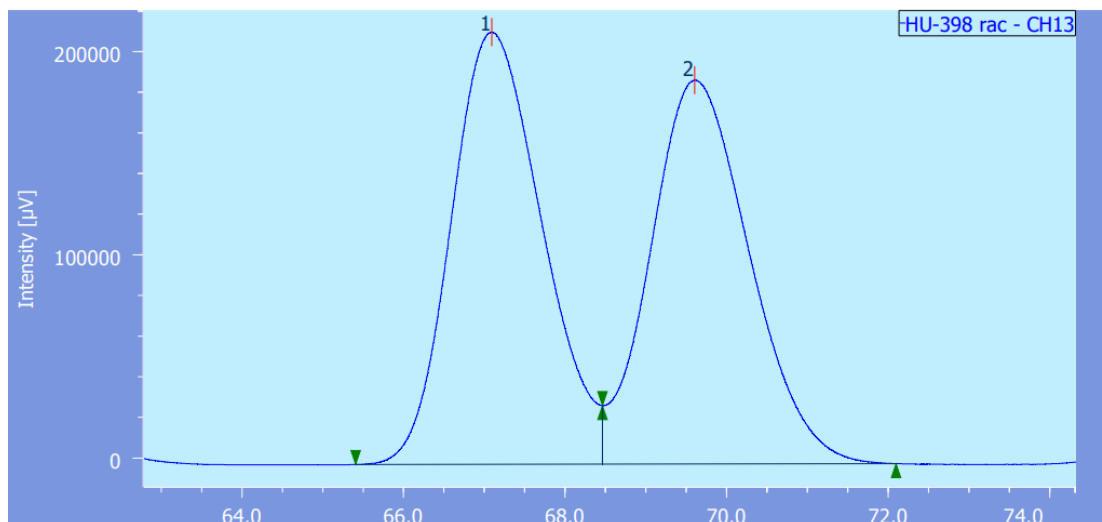

Decision

| # | Peak Name | CH | tR [min] | Area [ $\mu V \cdot sec$ ] | Height [ $\mu V$ ] | Area%  | Height% | Quantity | NTP   | Resolution | Symmetry Factor | Warning |
|---|-----------|----|----------|----------------------------|--------------------|--------|---------|----------|-------|------------|-----------------|---------|
| 1 | Unknown   | 13 | 67.090   | 16607242                   | 212546             | 50.770 | 52.962  | N/A      | 16475 | 1.161      | N/A             |         |
| 2 | Unknown   | 13 | 69.603   | 16103569                   | 188772             | 49.230 | 47.038  | N/A      | 15283 | N/A        | N/A             |         |

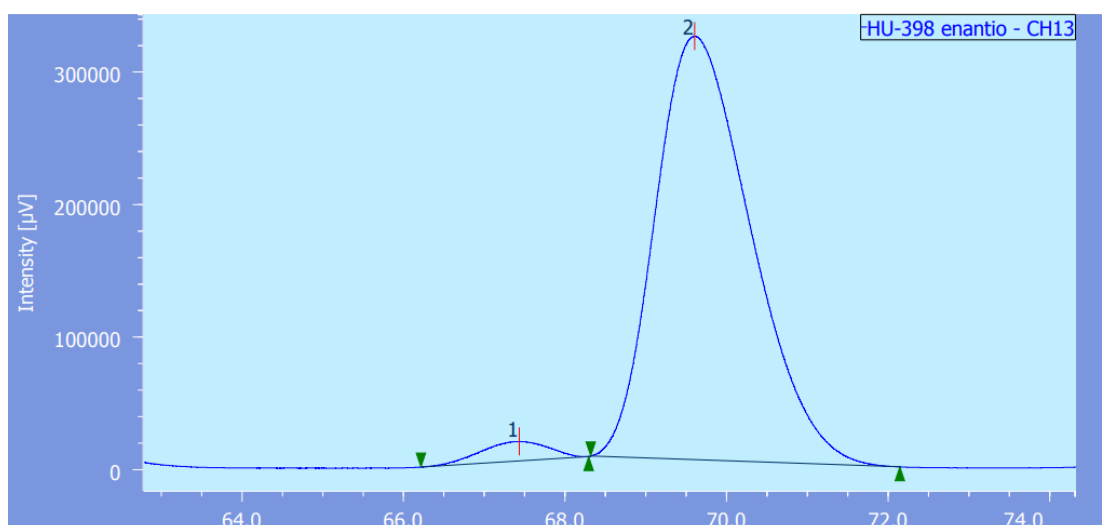

Decision

| # | Peak Name | CH | tR [min] | Area [ $\mu V \cdot sec$ ] | Height [ $\mu V$ ] | Area%  | Height% | Quantity | NTP   | Resolution | Symmetry Factor | Warning |
|---|-----------|----|----------|----------------------------|--------------------|--------|---------|----------|-------|------------|-----------------|---------|
| 1 | Unknown   | 13 | 67.433   | 860299                     | 14529              | 3.168  | 4.351   | N/A      | 26549 | 1.128      | 0.864           |         |
| 2 | Unknown   | 13 | 69.603   | 26294941                   | 319386             | 96.832 | 95.649  | N/A      | 15976 | N/A        | 1.310           |         |

### *tert*-Butyl (*R*)-2-(4-acetylphenyl)-3-cyclohexylpropanoate (**5**)

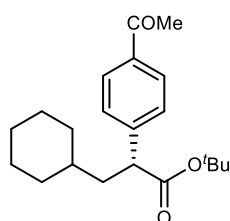

Prepared by **GP-A**. White solid, 46.5 mg, 70% yield. m.p. = 85–86 °C;  $^1H$  NMR (400 MHz,  $CDCl_3$ )  $\delta$  7.93 – 7.85 (m, 2H), 7.42 – 7.35 (m, 2H), 3.63 (t,  $J = 7.8$  Hz, 1H), 2.58 (s, 3H), 1.93 (ddd,  $J = 13.8, 8.1, 7.2$  Hz, 1H), 1.78 – 1.55 (m, 6H), 1.38 (s, 9H), 1.20 – 1.07 (m, 4H), 0.98 – 0.83 (m, 2H);  $^{13}C$  NMR (101 MHz,  $CDCl_3$ )  $\delta$  197.8, 172.8, 145.6, 135.8, 128.5, 128.1, 80.8, 50.0, 40.9, 35.4, 33.2, 33.0, 27.9, 26.6, 26.4, 26.11, 26.07. IR (film):  $\nu$  ( $cm^{-1}$ ) 2980, 2920, 2851, 1718, 1681, 1604, 1445, 1421, 1364, 1358, 1310, 1271, 1246, 1221, 1146, 1019, 960, 876, 834, 777, 751, 698, 599, 593; HR-MS (ESI)  $m/z$  calcd for  $C_{21}H_{30}NaO_3^+$   $[M+Na^+]$



353.20872, found 353.20914;  $[\alpha]_D^{23.4} = -40.4$  ( $c = 0.1$ ,  $\text{CHCl}_3$ ); HPLC conditions: Chiral-NR column, hexane/2-propanol = 98/2, flow rate = 1.0 mL/min,  $\lambda = 250$  nm,  $t_R = 25.4$  min (minor),  $t_R = 28.3$  min (major), 95:5 er.

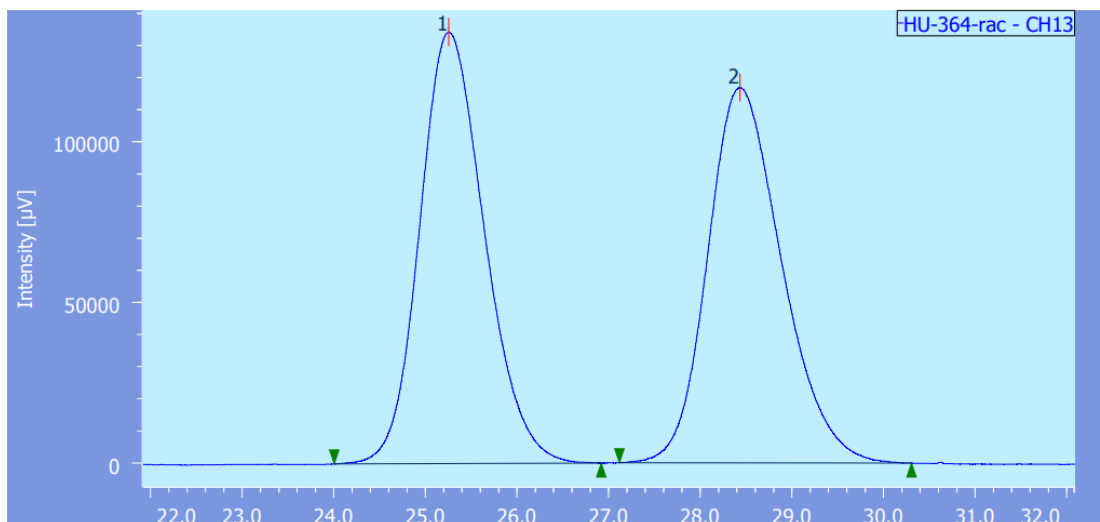

Decision

| # | Peak Name | CH | tR [min] | Area [ $\mu\text{V}\cdot\text{sec}$ ] | Height [ $\mu\text{V}$ ] | Area%  | Height% | Quantity | NTP  | Resolution | Symmetry Factor | Warning |
|---|-----------|----|----------|---------------------------------------|--------------------------|--------|---------|----------|------|------------|-----------------|---------|
| 1 | Unknown   | 13 | 25.253   | 6599423                               | 134252                   | 50.112 | 53.468  | N/A      | 6181 | 2.318      | 1.174           |         |
| 2 | Unknown   | 13 | 28.433   | 6569831                               | 116835                   | 49.888 | 46.532  | N/A      | 6020 | N/A        | 1.220           |         |

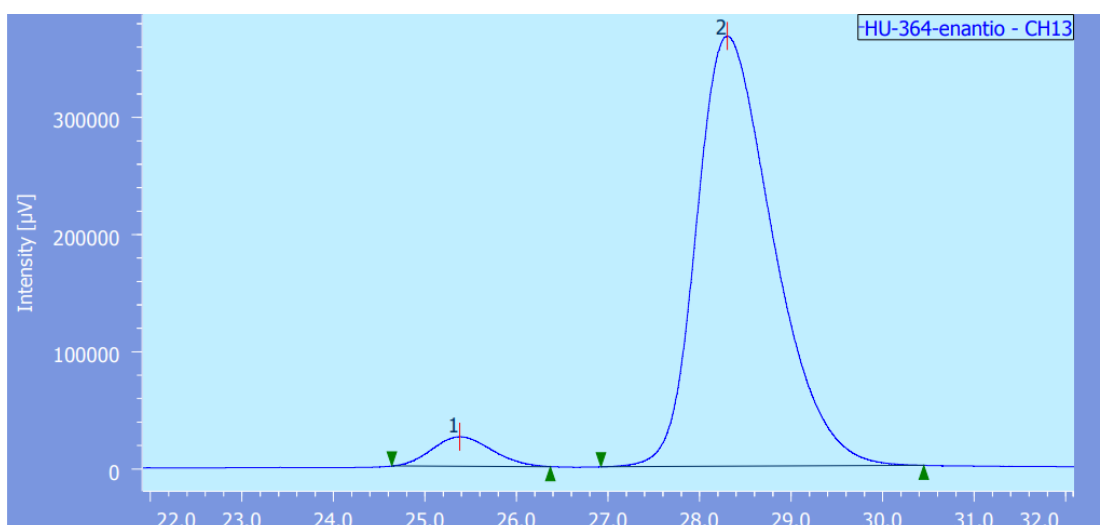

Decision

| # | Peak Name | CH | tR [min] | Area [ $\mu\text{V}\cdot\text{sec}$ ] | Height [ $\mu\text{V}$ ] | Area%  | Height% | Quantity | NTP  | Resolution | Symmetry Factor | Warning |
|---|-----------|----|----------|---------------------------------------|--------------------------|--------|---------|----------|------|------------|-----------------|---------|
| 1 | Unknown   | 13 | 25.377   | 1148444                               | 25155                    | 5.103  | 6.416   | N/A      | 6836 | 2.136      | 1.138           |         |
| 2 | Unknown   | 13 | 28.300   | 21357429                              | 366886                   | 94.897 | 93.584  | N/A      | 5573 | N/A        | 1.372           |         |

### Methyl (*R*)-4-(1-(*tert*-butoxy)-3-cyclohexyl-1-oxopropan-2-yl)benzoate (**6**)

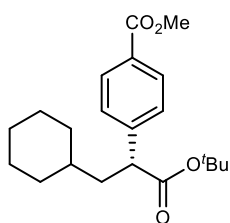

Prepared by **GP-A** by using  $\text{NiBr}_2 \cdot 3\text{H}_2\text{O}$  instead of  $\text{NiBr}_2 \cdot \text{DME}$ . White solid, 47.6 mg, 72% yield. m.p. = 96-97 °C;  $^1\text{H}$  NMR (400 MHz,  $\text{CDCl}_3$ )  $\delta$  8.00 – 7.94 (m, 2H), 7.40 – 7.33 (m, 2H), 3.89 (s, 3H), 3.62 (t,  $J = 7.8$  Hz, 1H), 1.93 (ddd,  $J = 13.8, 8.2, 7.2$  Hz, 1H), 1.78 – 1.55 (m, 6H), 1.37 (s, 9H), 1.19 – 1.05 (m, 4H), 0.97 – 0.82 (m, 2H);  $^{13}\text{C}$  NMR (101 MHz,  $\text{CDCl}_3$ )  $\delta$  172.8, 166.9, 145.3, 129.7, 128.7, 127.9, 80.8, 52.0, 50.0, 40.9, 35.4, 33.2, 33.0, 27.9, 26.4, 26.10, 26.07. IR (film):  $\nu$  ( $\text{cm}^{-1}$ ) 2978, 2928, 2902, 2850, 2842, 1718, 1608, 1448, 1436, 1416, 1366, 1347, 1309, 1277, 1260, 1235, 1225, 1177, 1145, 1127, 1105, 1090, 1015, 961, 864,

840, 755, 707, 484; HR-MS (ESI)  $m/z$  calcd for  $C_{21}H_{30}NaO_4^+$   $[M+Na^+]$  369.20363, found 369.20381;  $[\alpha]_D^{23.5} = -31.1$  ( $c = 0.1$ ,  $CHCl_3$ ); HPLC conditions: Chiral-NR column, hexane/2-propanol = 98/2, flow rate = 1.0 mL/min,  $\lambda = 240$  nm,  $t_R = 16.5$  min (minor),  $t_R = 17.6$  min (major), 96:4 er.

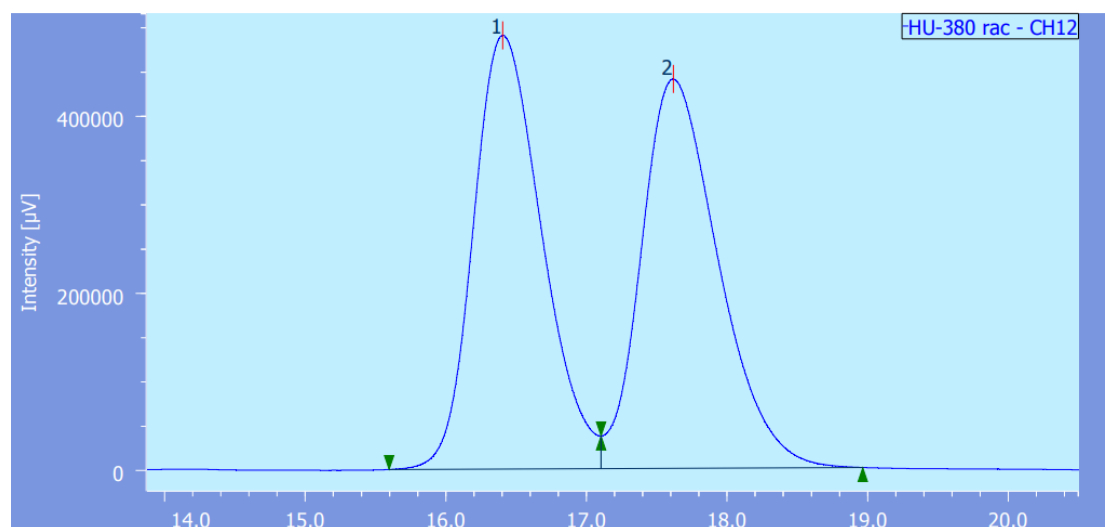

Decision

| # | Peak Name | CH | tR [min] | Area [ $\mu V \cdot sec$ ] | Height [ $\mu V$ ] | Area%  | Height% | Quantity | NTP  | Resolution | Symmetry Factor | Warning |
|---|-----------|----|----------|----------------------------|--------------------|--------|---------|----------|------|------------|-----------------|---------|
| 1 | Unknown   | 12 | 16.403   | 16608615                   | 489777             | 49.740 | 52.702  | N/A      | 5391 | 1.288      | N/A             |         |
| 2 | Unknown   | 12 | 17.617   | 16782467                   | 439549             | 50.260 | 47.298  | N/A      | 5014 | N/A        | N/A             |         |

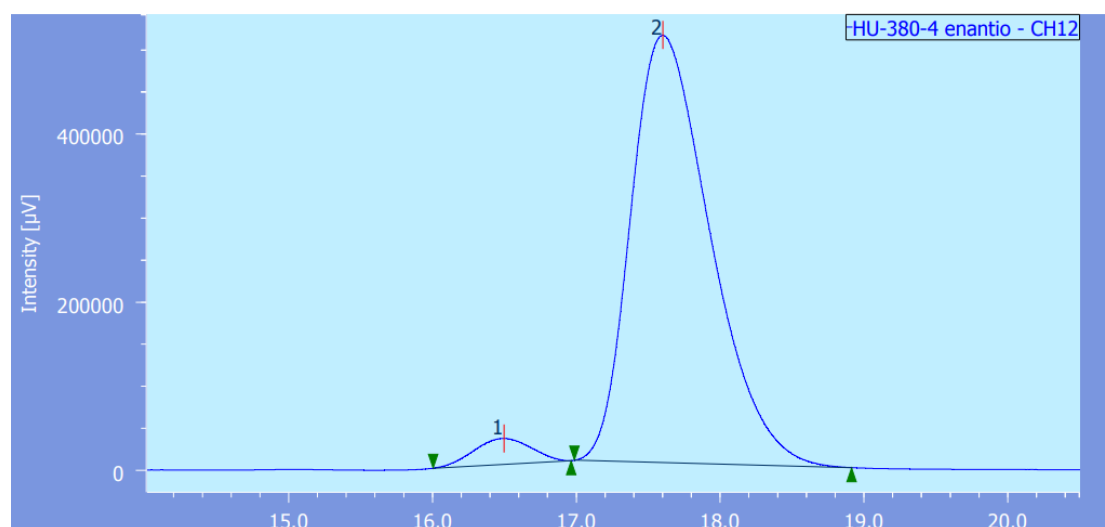

Decision

| # | Peak Name | CH | tR [min] | Area [ $\mu V \cdot sec$ ] | Height [ $\mu V$ ] | Area%  | Height% | Quantity | NTP  | Resolution | Symmetry Factor | Warning |
|---|-----------|----|----------|----------------------------|--------------------|--------|---------|----------|------|------------|-----------------|---------|
| 1 | Unknown   | 12 | 16.497   | 854988                     | 30744              | 4.187  | 5.704   | N/A      | 7314 | 1.237      | 0.960           |         |
| 2 | Unknown   | 12 | 17.600   | 19566865                   | 508202             | 95.813 | 94.296  | N/A      | 4790 | N/A        | 1.393           |         |

#### *tert*-Butyl (*R*)-3-cyclohexyl-2-(4-(trifluoromethyl)phenyl)propanoate (**7**)

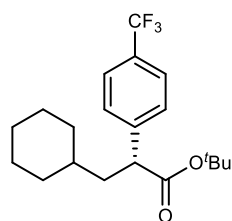

Prepared by GP-A. White solid, 53.2 mg, 75% yield. m.p. = 64-65 °C;  $^1H$  NMR (400 MHz,  $CDCl_3$ )  $\delta$  7.56 (d,  $J = 8.1$  Hz, 2H), 7.42 (d,  $J = 8.2$  Hz, 2H), 3.64 (t,  $J = 7.8$  Hz, 1H), 1.95 (ddd,  $J = 13.8, 8.3, 7.1$  Hz, 1H), 1.76 – 1.54 (m, 6H), 1.39 (s, 9H), 1.22 – 1.08 (m, 4H), 0.98 – 0.84 (m, 2H);  $^{13}C$  NMR (101 MHz,  $CDCl_3$ )  $\delta$  172.8, 144.1, 129.1 (q,  $J = 32.4$  Hz) 128.2, 125.4 (q,  $J = 4.0$  Hz), 124.2 (q,  $J = 272.7$  Hz), 80.9, 49.8, 41.1, 35.4, 33.2, 33.0, 27.9, 26.4, 26.12, 26.08;  $^{19}F$  NMR (377 MHz,  $CDCl_3$ )  $\delta$  -62.45. IR (film):  $\nu$  ( $cm^{-1}$ ) 2978, 2926, 2903,

2855, 1718, 1616, 1477, 1449, 1423, 1368, 1325, 1222, 1147, 1122, 1109, 1068, 1020, 893, 839, 760, 601, 517; HR-MS (ESI)  $m/z$  calcd for  $C_{20}H_{27}F_3NaO_2^+$   $[M+Na^+]$  379.18554, found 379.18572;  $[\alpha]_D^{23.5} = -28.0$  ( $c = 0.1$ ,  $CHCl_3$ ); HPLC conditions: Chiral-NR column, hexane/2-propanol = 99.8/0.2, flow rate = 0.5 mL/min,  $\lambda = 210$  nm,  $t_R = 14.8$  min (minor),  $t_R = 21.4$  min (major), 95:5 er.

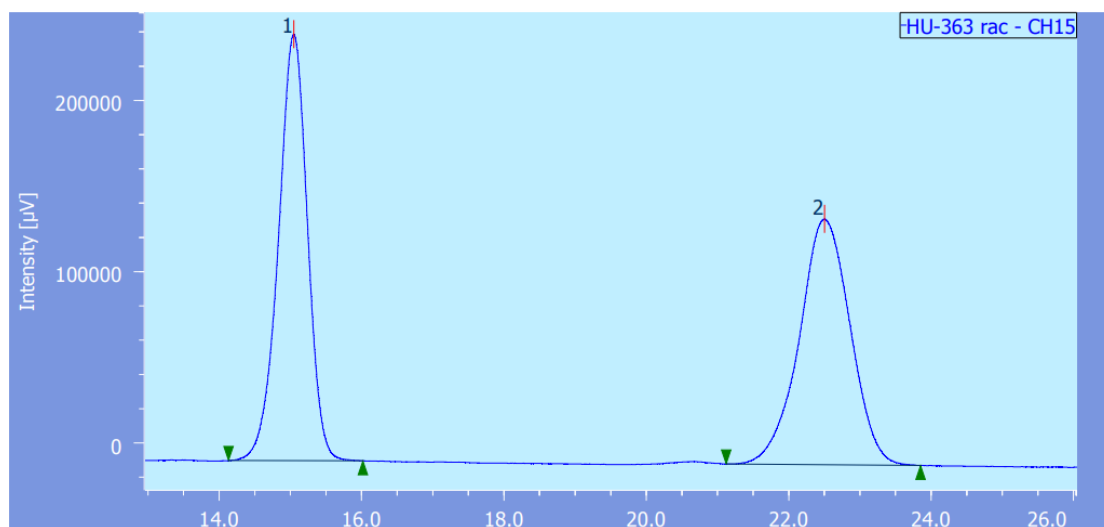

Decision

| # | Peak Name | CH | tR [min] | Area [ $\mu V \cdot sec$ ] | Height [ $\mu V$ ] | Area%  | Height% | Quantity | NTP  | Resolution | Symmetry Factor | Warning |
|---|-----------|----|----------|----------------------------|--------------------|--------|---------|----------|------|------------|-----------------|---------|
| 1 | Unknown   | 15 | 15.047   | 7060406                    | 248832             | 49.740 | 63.436  | N/A      | 6728 | 7.392      | 0.930           |         |
| 2 | Unknown   | 15 | 22.500   | 7134226                    | 143423             | 50.260 | 36.564  | N/A      | 4881 | N/A        | 0.971           |         |

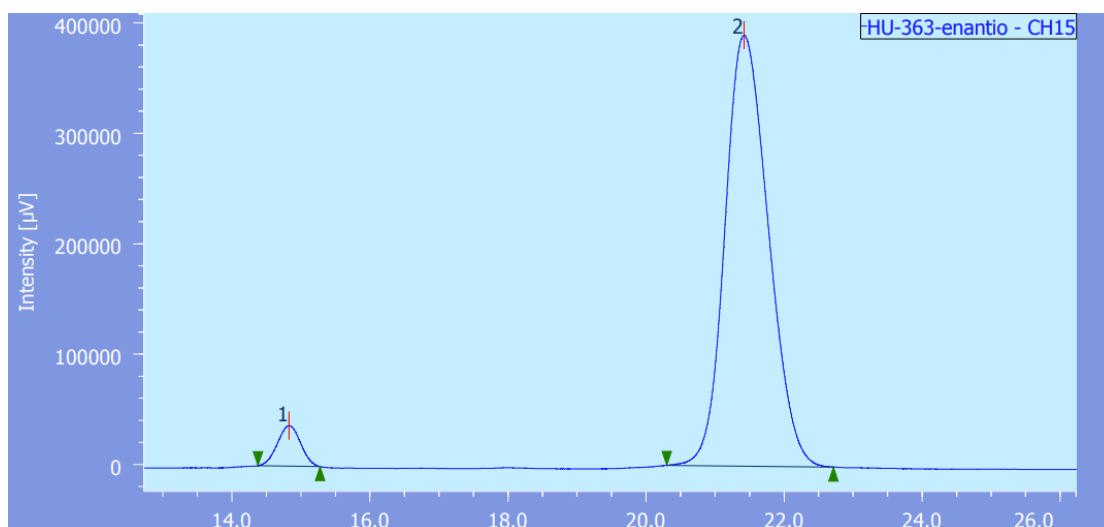

Decision

| # | Peak Name | CH | tR [min] | Area [ $\mu V \cdot sec$ ] | Height [ $\mu V$ ] | Area%  | Height% | Quantity | NTP  | Resolution | Symmetry Factor | Warning |
|---|-----------|----|----------|----------------------------|--------------------|--------|---------|----------|------|------------|-----------------|---------|
| 1 | Unknown   | 15 | 14.827   | 860252                     | 36712              | 4.807  | 8.602   | N/A      | 8828 | 7.384      | 1.004           |         |
| 2 | Unknown   | 15 | 21.417   | 17035268                   | 390082             | 95.193 | 91.398  | N/A      | 5469 | N/A        | 1.164           |         |

### *tert*-Butyl (*R*)-3-cyclohexyl-2-(4-fluorophenyl)propanoate (**8**)

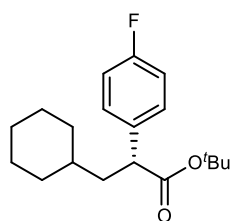

Prepared by **GP-A**. White solid, 43.2 mg, 70% yield. m.p. = 68-69 °C;  $^1H$  NMR (400 MHz,  $CDCl_3$ )  $\delta$  7.22 – 7.15 (m, 2H), 6.95 – 6.87 (m, 2H), 3.48 (t,  $J = 8.0$  Hz, 1H), 1.83 (ddd,  $J = 13.7, 8.3, 7.0$  Hz, 1H), 1.69 – 1.45 (m, 6H), 1.31 (s, 9H), 1.13 – 1.01 (m, 4H), 0.90 – 0.77 (m, 2H);  $^{13}C$  NMR (101 MHz,  $CDCl_3$ )  $\delta$  173.5, 163.0, 160.6, 135.8 (d,  $J = 3.2$  Hz), 129.3 (d,  $J = 8.0$  Hz), 115.2 (d,  $J = 21.3$  Hz), 80.5, 49.1, 41.2, 35.4, 33.2, 33.0, 27.9, 26.5, 26.2, 26.1;  $^{19}F$  NMR (377 MHz,  $CDCl_3$ )  $\delta$  -116.24. IR (film):  $\nu$  ( $cm^{-1}$ ) 2981, 2920, 2850, 1718, 1603,

1509, 1447, 1366, 1358, 1218, 1143, 1097, 1015, 973, 904, 877, 834, 807, 763, 733, 704, 581, 524, 490, 421; HR-MS (ESI)  $m/z$  calcd for  $C_{19}H_{27}FNaO_2^+$  [ $M+Na^+$ ] 329.18873, found 329.18877;  $[\alpha]_D^{23.6} = -18.9$  ( $c = 0.1$ ,  $CHCl_3$ ); HPLC conditions: Chiral-NR column, hexane/2-propanol = 99.8/0.2, flow rate = 0.5 mL/min,  $\lambda = 207$  nm,  $t_R = 20.5$  min (minor),  $t_R = 24.8$  min (major), 94:6 er.

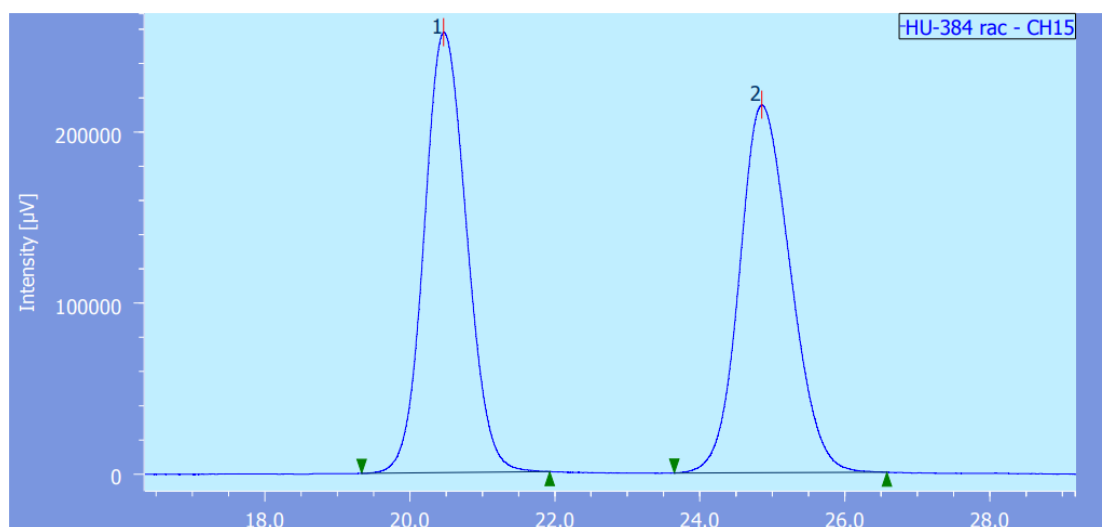

Decision

| # | Peak Name | CH | tR [min] | Area [ $\mu V \cdot sec$ ] | Height [ $\mu V$ ] | Area%  | Height% | Quantity | NTP  | Resolution | Symmetry Factor | Warning |
|---|-----------|----|----------|----------------------------|--------------------|--------|---------|----------|------|------------|-----------------|---------|
| 1 | Unknown   | 15 | 20.463   | 10475434                   | 257282             | 49.873 | 54.484  | N/A      | 5828 | 3.729      | 1.100           |         |
| 2 | Unknown   | 15 | 24.850   | 10528914                   | 214934             | 50.127 | 45.516  | N/A      | 5966 | N/A        | 1.152           |         |

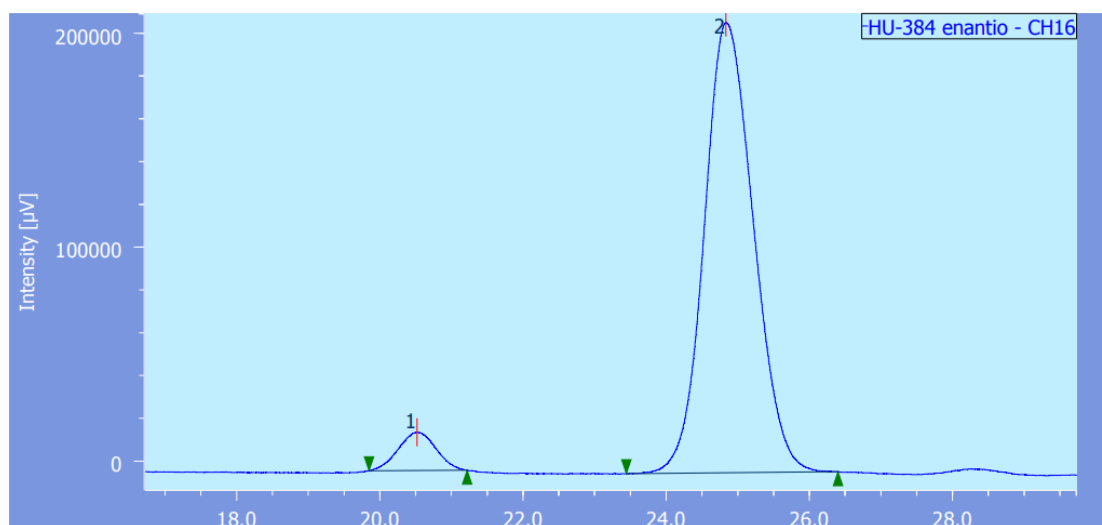

Decision

| # | Peak Name | CH | tR [min] | Area [ $\mu V \cdot sec$ ] | Height [ $\mu V$ ] | Area%  | Height% | Quantity | NTP  | Resolution | Symmetry Factor | Warning |
|---|-----------|----|----------|----------------------------|--------------------|--------|---------|----------|------|------------|-----------------|---------|
| 1 | Unknown   | 16 | 20.520   | 658284                     | 17916              | 6.143  | 7.848   | N/A      | 6847 | 3.845      | 0.999           |         |
| 2 | Unknown   | 16 | 24.833   | 10057527                   | 210365             | 93.857 | 92.152  | N/A      | 6239 | N/A        | 1.125           |         |

### *tert*-Butyl (*R*)-2-(4-chlorophenyl)-3-cyclohexylpropanoate (**9**)

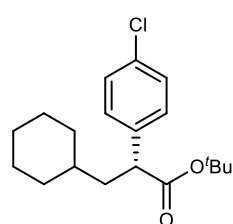

Prepared by GP-A. White solid, 46.8 mg, 72% yield. m.p. = 76-77 °C;  $^1H$  NMR (400 MHz,  $CDCl_3$ )  $\delta$  7.22 – 7.12 (m, 4H), 3.47 (t,  $J = 7.8$  Hz, 1H), 1.82 (ddd,  $J = 13.7, 8.2, 7.2$  Hz, 1H), 1.68 – 1.44 (m, 6H), 1.31 (s, 9H), 1.14 – 1.00 (m, 4H), 0.89 – 0.76 (m, 2H);  $^{13}C$  NMR (101 MHz,  $CDCl_3$ )  $\delta$  173.2, 138.5, 132.6, 129.2, 128.5, 80.6, 49.3, 41.0, 35.3, 33.2, 33.0, 27.9, 26.4, 26.13, 26.09. IR (film):  $\nu$  ( $cm^{-1}$ ) 2981, 2919, 2850, 1718, 1493, 1444, 1418, 1390, 1366, 1356, 1330, 1296, 1274, 1255, 1219, 1144, 1090, 1013, 972, 902, 892, 876, 841, 828,

768, 722, 564, 516, 503; HR-MS (ESI)  $m/z$  calcd for  $C_{19}H_{27}ClNaO_2^+$   $[M+Na^+]$  345.15918, found 345.15928;  $[\alpha]_D^{23.6} = -23.4$  ( $c = 0.1$ ,  $CHCl_3$ ); HPLC conditions: Chiral-NR column, hexane/2-propanol = 99.8/0.2, flow rate = 0.5 mL/min,  $\lambda = 220$  nm,  $t_R = 25.1$  min (minor),  $t_R = 31.5$  min (major), 95:5 er.

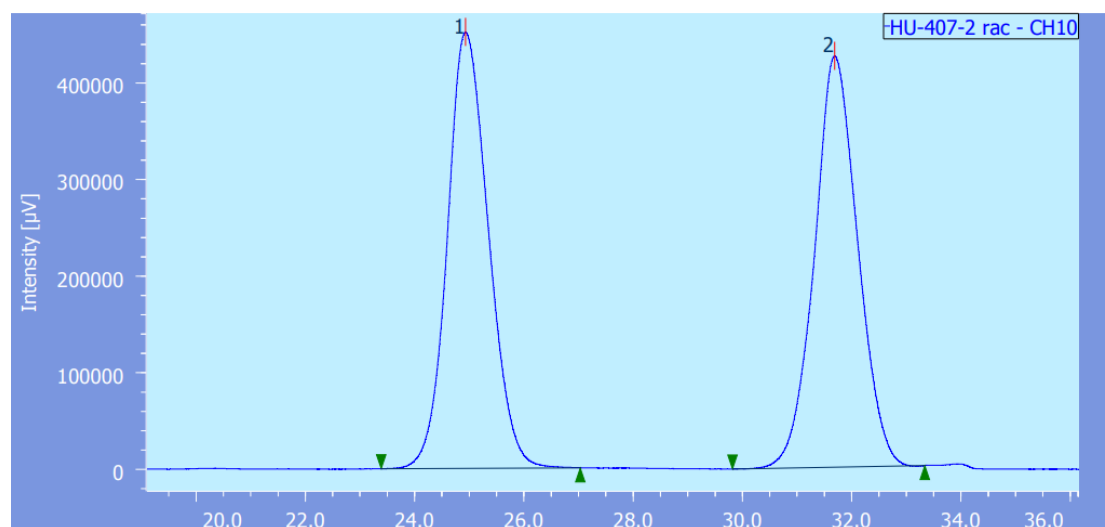

Decision

| # | Peak Name | CH | tR [min] | Area [ $\mu V \cdot sec$ ] | Height [ $\mu V$ ] | Area%  | Height% | Quantity | NTP  | Resolution | Symmetry Factor | Warning |
|---|-----------|----|----------|----------------------------|--------------------|--------|---------|----------|------|------------|-----------------|---------|
| 1 | Unknown   | 10 | 24.930   | 23583307                   | 451503             | 50.151 | 51.490  | N/A      | 5395 | 4.877      | 1.127           |         |
| 2 | Unknown   | 10 | 31.687   | 23441516                   | 425374             | 49.849 | 48.510  | N/A      | 7960 | N/A        | 1.046           |         |

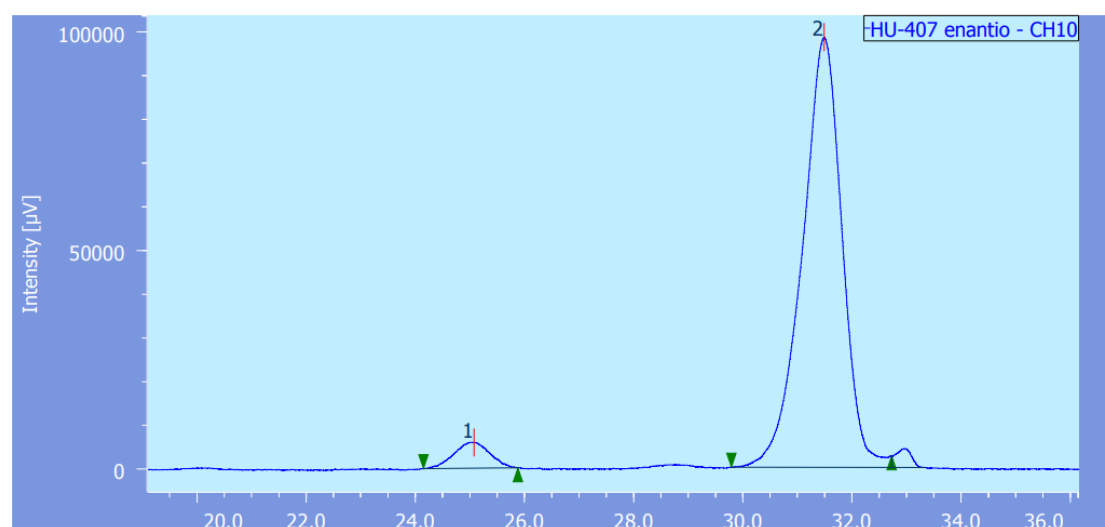

Decision

| # | Peak Name | CH | tR [min] | Area [ $\mu V \cdot sec$ ] | Height [ $\mu V$ ] | Area%  | Height% | Quantity | NTP  | Resolution | Symmetry Factor | Warning |
|---|-----------|----|----------|----------------------------|--------------------|--------|---------|----------|------|------------|-----------------|---------|
| 1 | Unknown   | 10 | 25.073   | 271664                     | 5907               | 5.171  | 5.668   | N/A      | 6657 | 5.122      | 0.924           |         |
| 2 | Unknown   | 10 | 31.487   | 4981907                    | 98309              | 94.829 | 94.332  | N/A      | 9653 | N/A        | 0.879           |         |

### *tert*-Butyl (*R*)-3-cyclohexyl-2-phenylpropanoate (**10**)

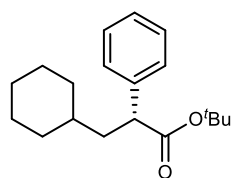

Prepared by **GP-B**. Colorless oil, 39.5 mg, 68% yield.  $^1H$  NMR (400 MHz,  $CDCl_3$ )  $\delta$  7.25 – 7.20 (m, 4H), 7.19 – 7.13 (m, 1H), 3.50 (dd,  $J = 8.4, 7.2$  Hz, 1H), 1.86 (ddd,  $J = 13.8, 8.5, 7.0$  Hz, 1H), 1.70 – 1.47 (m, 6H), 1.31 (s, 9H), 1.15 – 1.02 (m, 4H), 0.91 – 0.76 (m, 2H);  $^{13}C$  NMR (101 MHz,  $CDCl_3$ )  $\delta$  173.6, 140.1, 128.4, 127.8, 126.8, 80.4, 49.9, 41.2, 35.4, 33.2, 33.1, 27.9, 26.5, 26.2, 26.1. IR (film):  $\nu$  ( $cm^{-1}$ ) 2976, 2923, 2849, 1726, 1602, 1495, 1478, 1448, 1391, 1365, 1274, 1252, 1219, 1143, 1032, 970, 891, 842, 750, 729, 697, 547, 519; HR-MS (ESI)  $m/z$  calcd for

$C_{19}H_{28}NaO_2^+$  [M+Na<sup>+</sup>] 311.19815, found 311.19827; [ $\alpha$ ]<sub>D</sub><sup>22.7</sup> = -28.1 (c = 0.1, CHCl<sub>3</sub>); HPLC conditions: Chiral-NR column, hexane/2-propanol = 99.8/0.2, flow rate = 0.5 mL/min,  $\lambda$  = 210 nm,  $t_R$  = 23.0 min (minor),  $t_R$  = 24.6 min (major), 96:4 er.

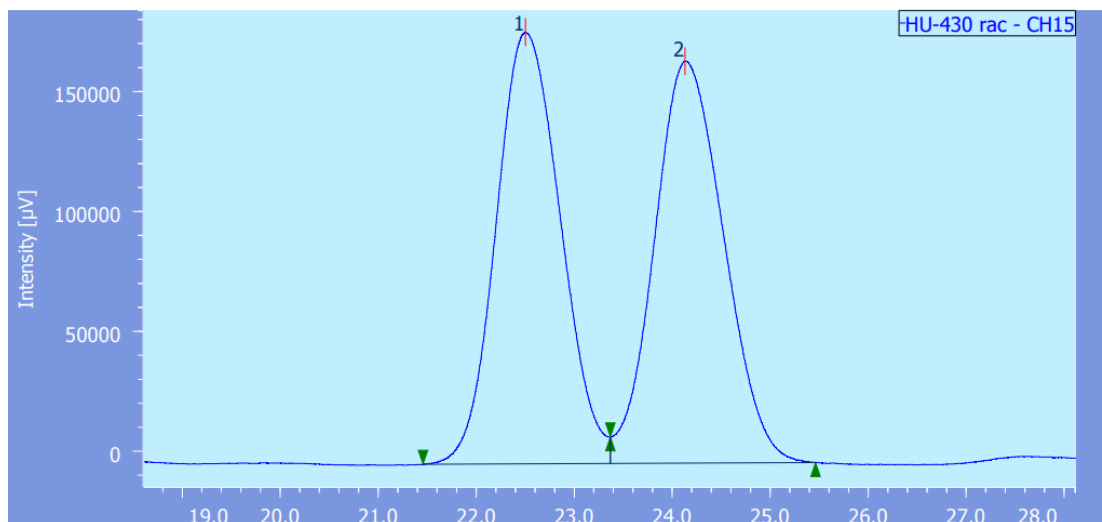

Decision

| # | Peak Name | CH | tR [min] | Area [ $\mu$ V·sec] | Height [ $\mu$ V] | Area%  | Height% | Quantity | NTP  | Resolution | Symmetry Factor | Warning |
|---|-----------|----|----------|---------------------|-------------------|--------|---------|----------|------|------------|-----------------|---------|
| 1 | Unknown   | 15 | 22.500   | 8203439             | 179910            | 49.868 | 51.784  | N/A      | 5426 | 1.288      | N/A             |         |
| 2 | Unknown   | 15 | 24.130   | 8246842             | 167517            | 50.132 | 48.216  | N/A      | 5386 | N/A        | N/A             |         |

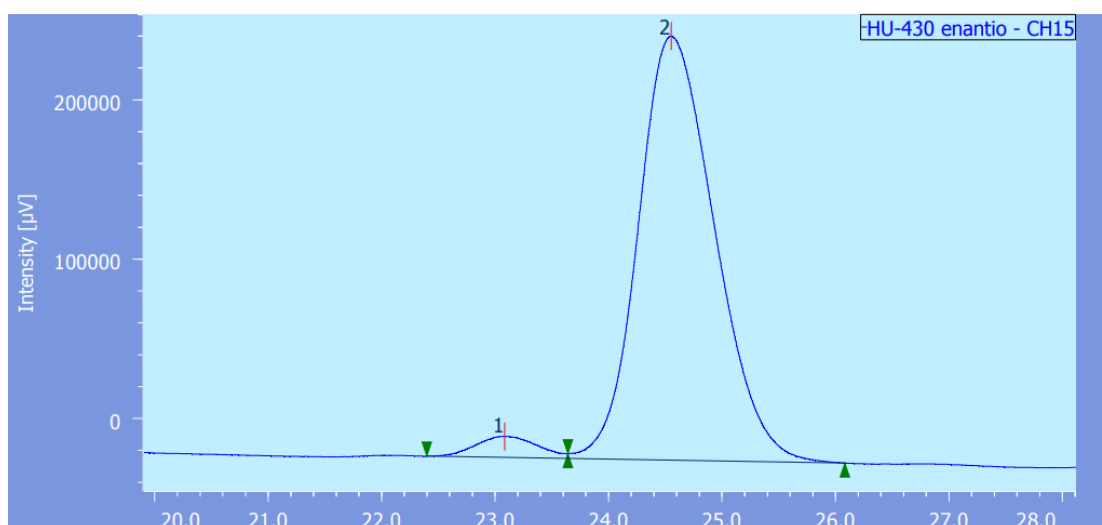

Decision

| # | Peak Name | CH | tR [min] | Area [ $\mu$ V·sec] | Height [ $\mu$ V] | Area%  | Height% | Quantity | NTP  | Resolution | Symmetry Factor | Warning |
|---|-----------|----|----------|---------------------|-------------------|--------|---------|----------|------|------------|-----------------|---------|
| 1 | Unknown   | 15 | 23.083   | 503753              | 13196             | 3.889  | 4.727   | N/A      | 7834 | 1.293      | N/A             |         |
| 2 | Unknown   | 15 | 24.550   | 12448801            | 265991            | 96.111 | 95.273  | N/A      | 6365 | N/A        | 1.190           |         |

### *tert*-Butyl (*R*)-2-([1,1'-biphenyl]-4-yl)-3-cyclohexylpropanoate (11)

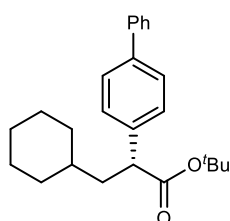

Prepared by **GP-B**. White solid, 51.0 mg, 70% yield. m.p. = 64-65 °C; <sup>1</sup>H NMR (400 MHz, CDCl<sub>3</sub>)  $\delta$  7.63 – 7.58 (m, 2H), 7.58 – 7.52 (m, 2H), 7.47 – 7.41 (m, 2H), 7.41 – 7.36 (m, 2H), 7.36 – 7.31 (m, 1H), 3.64 (dd,  $J$  = 8.5, 7.1 Hz, 1H), 1.99 (ddd,  $J$  = 13.7, 8.6, 6.9 Hz, 1H), 1.83 – 1.59 (m, 6H), 1.43 (s, 9H), 1.29 – 1.13 (m, 4H), 1.02 – 0.88 (m, 2H); <sup>13</sup>C NMR (101 MHz, CDCl<sub>3</sub>)  $\delta$  173.6, 140.8, 139.6, 139.2, 128.7, 128.2, 127.12, 127.08, 127.0, 80.5, 49.5, 41.3, 35.5, 33.19, 33.16, 28.0, 26.5, 26.17, 26.15. IR (film):  $\nu$  (cm<sup>-1</sup>) 2975, 2931, 2917, 2847, 1720, 1484, 1447, 1393, 1367, 1337, 1319, 1259, 1218, 1142, 1126, 1008, 967, 890, 879, 825,

757, 730, 697, 681, 557, 549, 502; HR-MS (ESI)  $m/z$  calcd for  $C_{25}H_{32}NaO_2^+$   $[M+Na^+]$  387.22945, found 387.22919;  $[\alpha]_D^{23.8} = -24.6$  ( $c = 0.1$ ,  $CHCl_3$ ); HPLC conditions: Chiral-NR column, hexane/2-propanol = 99/1, flow rate = 1.0 mL/min,  $\lambda = 254$  nm,  $t_R = 11.0$  min (minor),  $t_R = 18.1$  min (major), 96:4 er.

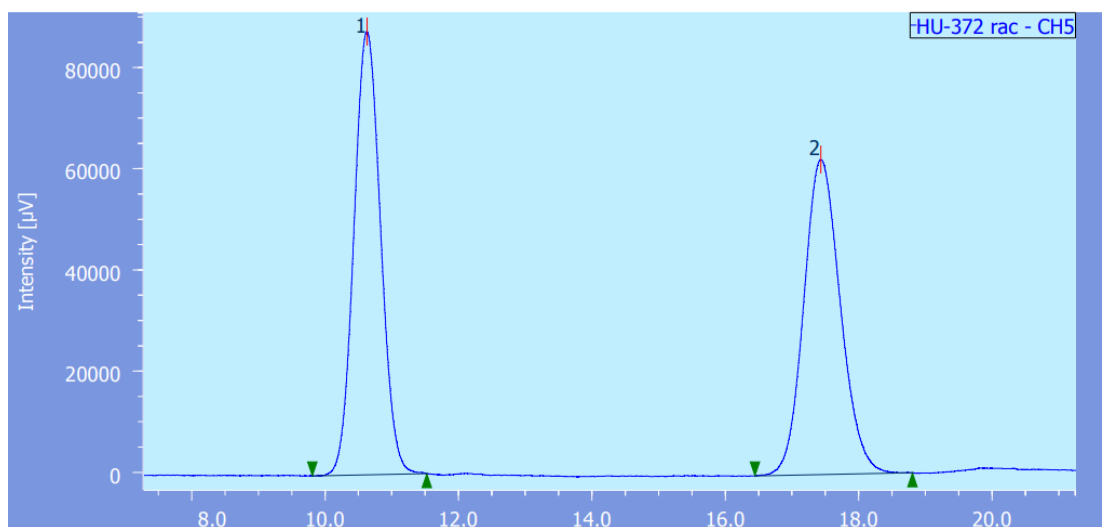

Decision

| # | Peak Name | CH | tR [min] | Area [ $\mu$ V-sec] | Height [ $\mu$ V] | Area%  | Height% | Quantity | NTP  | Resolution | Symmetry Factor | Warning |
|---|-----------|----|----------|---------------------|-------------------|--------|---------|----------|------|------------|-----------------|---------|
| 1 | Unknown   | 5  | 10.627   | 2428999             | 87561             | 50.576 | 58.440  | N/A      | 3341 | 7.878      | 1.062           |         |
| 2 | Unknown   | 5  | 17.430   | 2373713             | 62270             | 49.424 | 41.560  | N/A      | 4896 | N/A        | 1.122           |         |

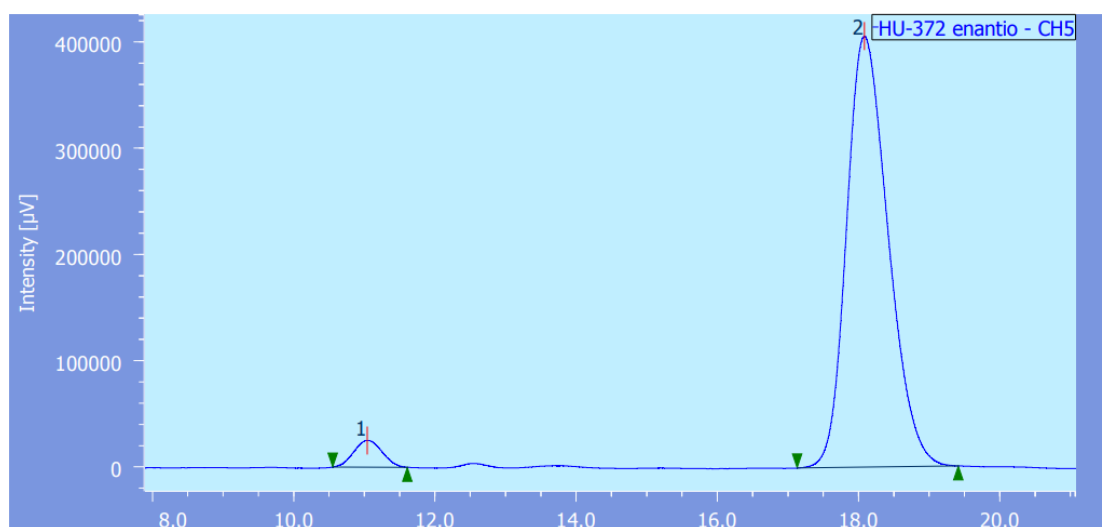

Decision

| # | Peak Name | CH | tR [min] | Area [ $\mu$ V-sec] | Height [ $\mu$ V] | Area%  | Height% | Quantity | NTP  | Resolution | Symmetry Factor | Warning |
|---|-----------|----|----------|---------------------|-------------------|--------|---------|----------|------|------------|-----------------|---------|
| 1 | Unknown   | 5  | 11.040   | 706312              | 25188             | 4.084  | 5.849   | N/A      | 3357 | 7.673      | 1.057           |         |
| 2 | Unknown   | 5  | 18.080   | 16587493            | 405455            | 95.916 | 94.151  | N/A      | 4503 | N/A        | 1.246           |         |

### *tert*-Butyl (*R*)-3-cyclohexyl-2-(4-(trifluoromethoxy)phenyl)propanoate (**12**)

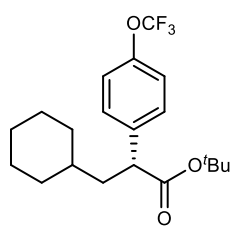

Prepared by **GP-A**. White solid, 45.1 mg, 60% yield. m.p. = 69-70 °C;  $^1H$  NMR (400 MHz,  $CDCl_3$ )  $\delta$  7.35 – 7.29 (m, 2H), 7.14 (d,  $J = 8.1$  Hz, 2H), 3.58 (dd,  $J = 8.3, 7.4$  Hz, 1H), 1.92 (ddd,  $J = 13.8, 8.5, 6.9$  Hz, 1H), 1.77 – 1.51 (m, 6H), 1.39 (s, 9H), 1.22 – 1.09 (m, 4H), 0.99 – 0.83 (m, 2H);  $^{13}C$  NMR (101 MHz,  $CDCl_3$ )  $\delta$  173.2, 148.1, 138.8, 129.2, 120.8, 120.5 (q,  $J = 257.9$  Hz), 80.8, 49.2, 41.3, 35.4, 33.2, 33.1, 27.9, 26.5, 26.14, 26.11;  $^{19}F$  NMR (377 MHz,  $CDCl_3$ )  $\delta$  -57.86. IR (film):  $\nu$  ( $cm^{-1}$ ) 2980, 2947, 2921, 2851, 1718, 1507, 1448,

1367, 1258, 1217, 1205, 1190, 1145, 1129, 1103, 920, 852, 842, 813, 765, 695, 668, 619, 539; HR-MS (ESI)  $m/z$  calcd for  $C_{20}H_{27}F_3NaO_3^+$  [ $M+Na^+$ ] 395.18045, found 395.18069;  $[\alpha]_D^{23.7} = -19.5$  ( $c = 0.1$ ,  $CHCl_3$ ); HPLC conditions: Chiral-NR column, hexane/2-propanol = 99.8/0.2, flow rate = 0.5 mL/min,  $\lambda = 210$  nm,  $t_R = 14.0$  min (minor),  $t_R = 19.8$  min (major), 94:6 er.

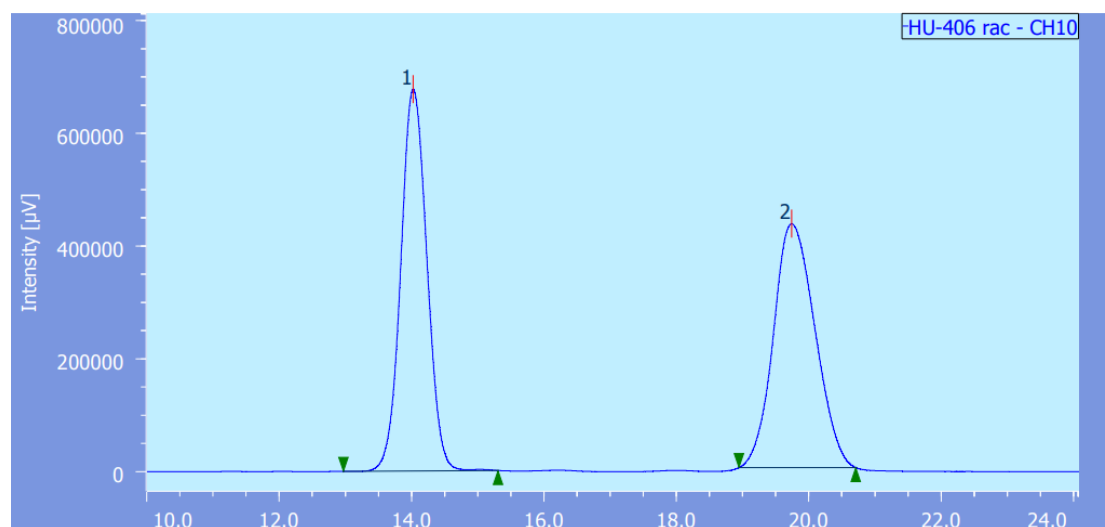

Decision

| # | Peak Name | CH | tR [min] | Area [µV-sec] | Height [µV] | Area%  | Height% | Quantity | NTP  | Resolution | Symmetry Factor | Warning |
|---|-----------|----|----------|---------------|-------------|--------|---------|----------|------|------------|-----------------|---------|
| 1 | Unknown   | 10 | 14.023   | 18576143      | 677190      | 49.610 | 61.034  | N/A      | 6067 | 6.086      | 1.044           |         |
| 2 | Unknown   | 10 | 19.740   | 18868523      | 432336      | 50.390 | 38.966  | N/A      | 4606 | N/A        | 1.125           |         |

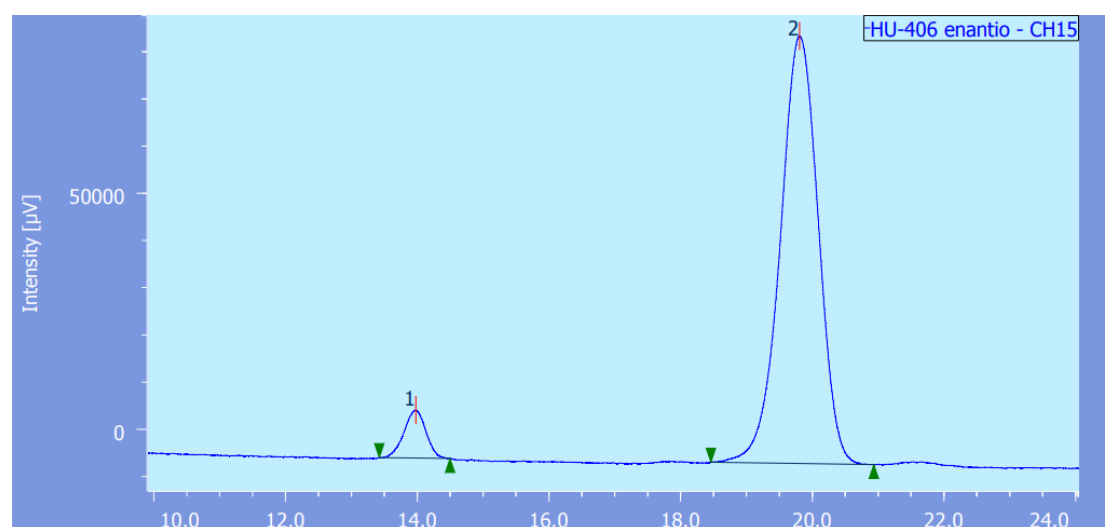

Decision

| # | Peak Name | CH | tR [min] | Area [µV-sec] | Height [µV] | Area%  | Height% | Quantity | NTP  | Resolution | Symmetry Factor | Warning |
|---|-----------|----|----------|---------------|-------------|--------|---------|----------|------|------------|-----------------|---------|
| 1 | Unknown   | 15 | 13.977   | 234629        | 10124       | 6.060  | 10.056  | N/A      | 8527 | 7.066      | 0.940           |         |
| 2 | Unknown   | 15 | 19.803   | 3637130       | 90552       | 93.940 | 89.944  | N/A      | 5711 | N/A        | 0.945           |         |

### *tert*-Butyl (*R*)-2-(4-acetoxyphenyl)-3-cyclohexylpropanoate (**13**)

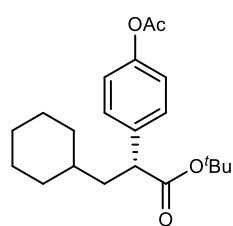

Prepared by **GP-B**. White solid, 41.9 mg, 60% yield. m.p. = 75-76 °C;  $^1H$  NMR (400 MHz,  $CDCl_3$ )  $\delta$  7.33 – 7.27 (m, 2H), 7.06 – 6.99 (m, 2H), 3.57 (dd,  $J = 8.6, 7.0$  Hz, 1H), 2.28 (s, 3H), 1.91 (ddd,  $J = 13.7, 8.7, 6.8$  Hz, 1H), 1.76 – 1.53 (m, 6H), 1.39 (s, 9H), 1.22 – 1.12 (m, 4H), 0.97 – 0.83 (m, 2H);  $^{13}C$  NMR (101 MHz,  $CDCl_3$ )  $\delta$  173.4, 169.4, 149.5, 137.6, 128.8, 121.4, 80.5, 49.3, 41.4, 35.4, 33.14, 33.12, 27.9, 26.5, 26.12, 26.11, 21.1. IR (film):  $\nu$  ( $cm^{-1}$ ) 2977, 2928, 2916, 2844, 1757, 1719, 1509, 1446, 1366, 1256, 1213, 1144, 1021, 1010, 913,



855, 842, 768, 744, 657, 593, 574, 524; HR-MS (ESI)  $m/z$  calcd for  $C_{21}H_{30}NaO_4^+$   $[M+Na^+]$  369.20363, found 369.20377;  $[\alpha]_D^{22.3} = -17.0$  ( $c = 0.1$ ,  $CHCl_3$ ); HPLC conditions: NR column, hexane/2-propanol = 98/2, flow rate = 1.0 mL/min,  $\lambda = 220$  nm,  $t_R = 21.8$  min (minor),  $t_R = 24.2$  min (major), 95:5 er.

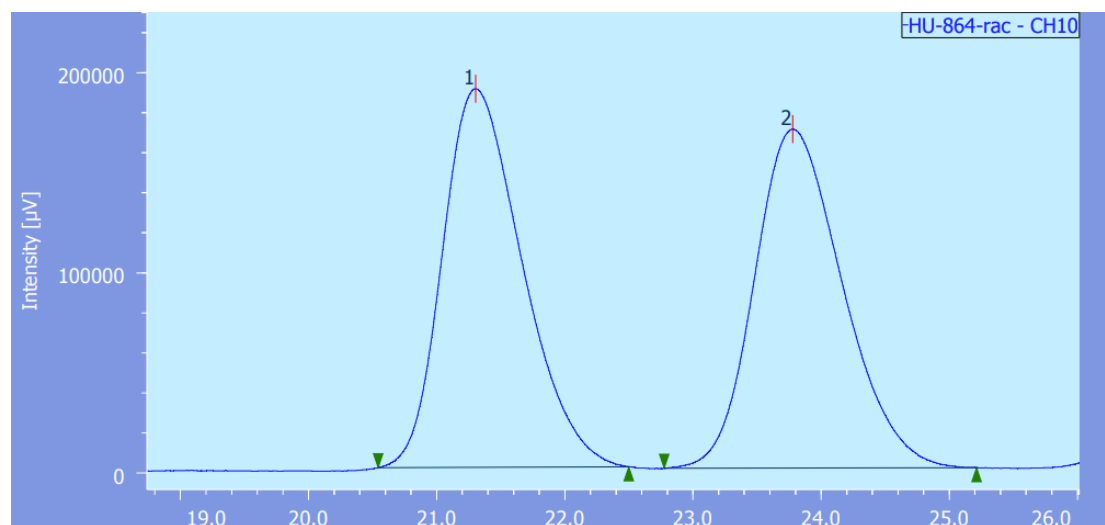

Decision

| # | Peak Name | CH | tR [min] | Area [ $\mu V \cdot sec$ ] | Height [ $\mu V$ ] | Area%  | Height% | Quantity | NTP  | Resolution | Symmetry Factor | Warning |
|---|-----------|----|----------|----------------------------|--------------------|--------|---------|----------|------|------------|-----------------|---------|
| 1 | Unknown   | 10 | 21.303   | 8168155                    | 189065             | 50.272 | 52.768  | N/A      | 5562 | 2.066      | 1.299           |         |
| 2 | Unknown   | 10 | 23.777   | 8079927                    | 169228             | 49.728 | 47.232  | N/A      | 5714 | N/A        | 1.217           |         |

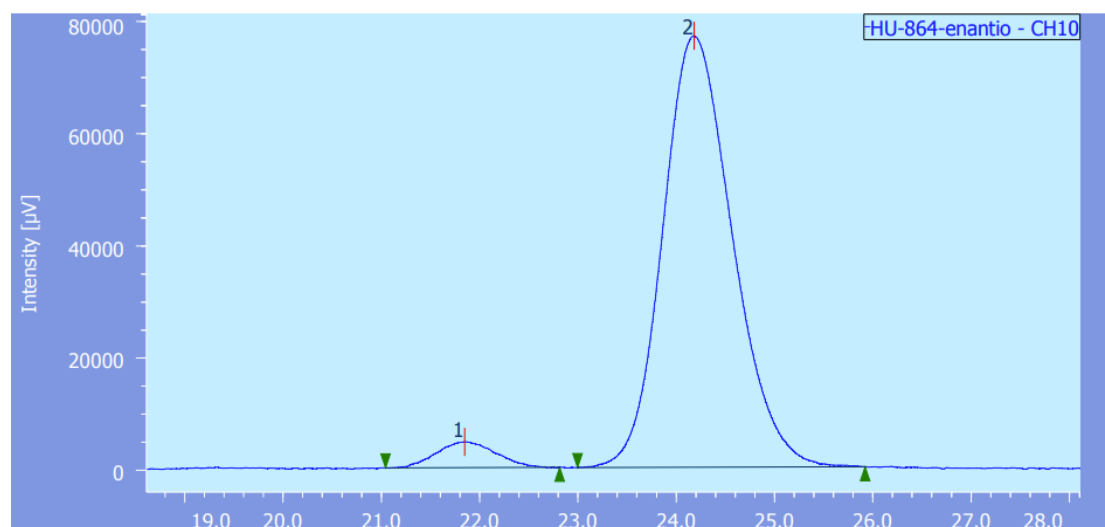

Decision

| # | Peak Name | CH | tR [min] | Area [ $\mu V \cdot sec$ ] | Height [ $\mu V$ ] | Area%  | Height% | Quantity | NTP  | Resolution | Symmetry Factor | Warning |
|---|-----------|----|----------|----------------------------|--------------------|--------|---------|----------|------|------------|-----------------|---------|
| 1 | Unknown   | 10 | 21.847   | 195321                     | 4620               | 4.904  | 5.672   | N/A      | 5669 | 1.913      | 1.097           |         |
| 2 | Unknown   | 10 | 24.180   | 3787459                    | 76832              | 95.096 | 94.328  | N/A      | 5661 | N/A        | 1.180           |         |

**(R)-4-(1-(*tert*-Butoxy)-3-cyclohexyl-1-oxopropan-2-yl)phenyl benzoate (14)**

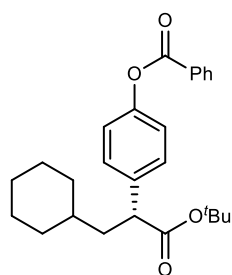

Prepared by **GP-B**. White solid, 48.0 mg, 59% yield. m.p. = 77-78 °C;  $^1H$  NMR (400 MHz,  $CDCl_3$ )  $\delta$  8.23 – 8.17 (m, 2H), 7.67 – 7.60 (m, 1H), 7.55 – 7.47 (m, 2H), 7.41 – 7.34 (m, 2H), 7.20 – 7.14 (m, 2H), 3.66 – 3.56 (m, 1H), 1.94 (ddd,  $J = 13.8, 8.4, 7.0$  Hz, 1H), 1.79 – 1.56 (m, 6H), 1.41 (s, 9H), 1.28 – 1.13 (m, 4H), 0.99 – 0.87 (m, 2H);  $^{13}C$  NMR (101 MHz,  $CDCl_3$ )  $\delta$  173.4, 165.1, 149.8, 137.7, 133.5, 130.1, 129.6, 128.9, 128.5, 121.5, 80.6, 49.3, 41.3, 35.4, 33.2, 33.1, 28.0, 26.5, 26.13, 26.11. IR (film):  $\nu$  ( $cm^{-1}$ ) 2878, 2920,

2847, 2361, 2337, 1734, 1717, 1560, 1508, 1449, 1390, 1365, 1267, 1208, 1171, 1145, 1127, 1082, 1062, 1021, 876, 839, 821, 764, 703, 686, 671, 548, 529; HR-MS (ESI)  $m/z$  calcd for  $C_{26}H_{32}NaO_4^+$   $[M+Na^+]$  431.21928, found 431.21975;  $[\alpha]_D^{22.5} = -16.9$  ( $c = 0.1$ ,  $CHCl_3$ ); HPLC conditions: NR column, hexane/2-propanol = 98/2, flow rate = 1.0 mL/min,  $\lambda = 230$  nm,  $t_R = 23.6$  min (minor),  $t_R = 28.8$  min (major), 93:7 er.

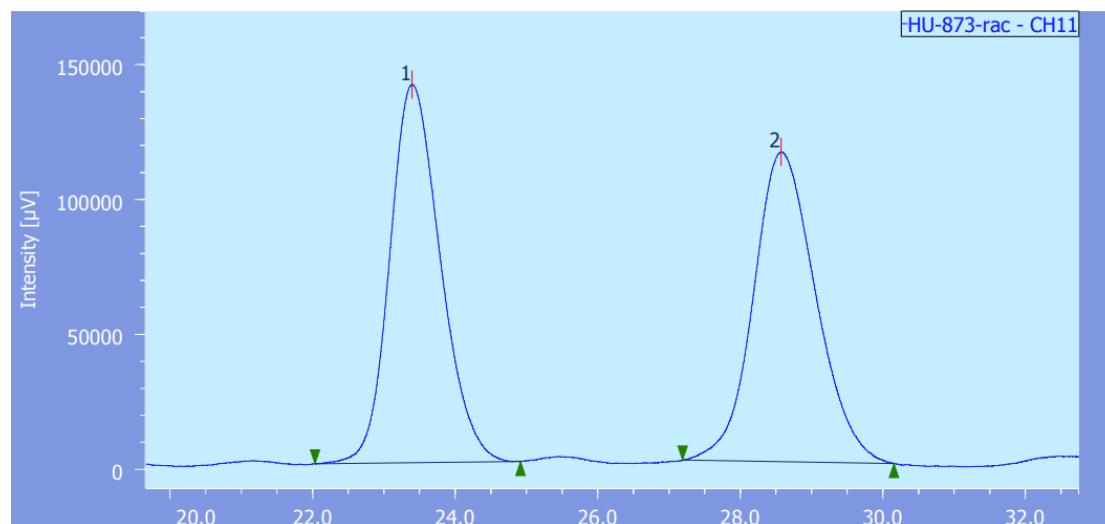

Decision

| # | Peak Name | CH | tR [min] | Area [ $\mu V \cdot sec$ ] | Height [ $\mu V$ ] | Area%  | Height% | Quantity | NTP  | Resolution | Symmetry Factor | Warning |
|---|-----------|----|----------|----------------------------|--------------------|--------|---------|----------|------|------------|-----------------|---------|
| 1 | Unknown   | 11 | 23.393   | 6913127                    | 140196             | 49.701 | 54.977  | N/A      | 5294 | 3.619      | 1.190           |         |
| 2 | Unknown   | 11 | 28.570   | 6996180                    | 114811             | 50.299 | 45.023  | N/A      | 5218 | N/A        | 1.116           |         |

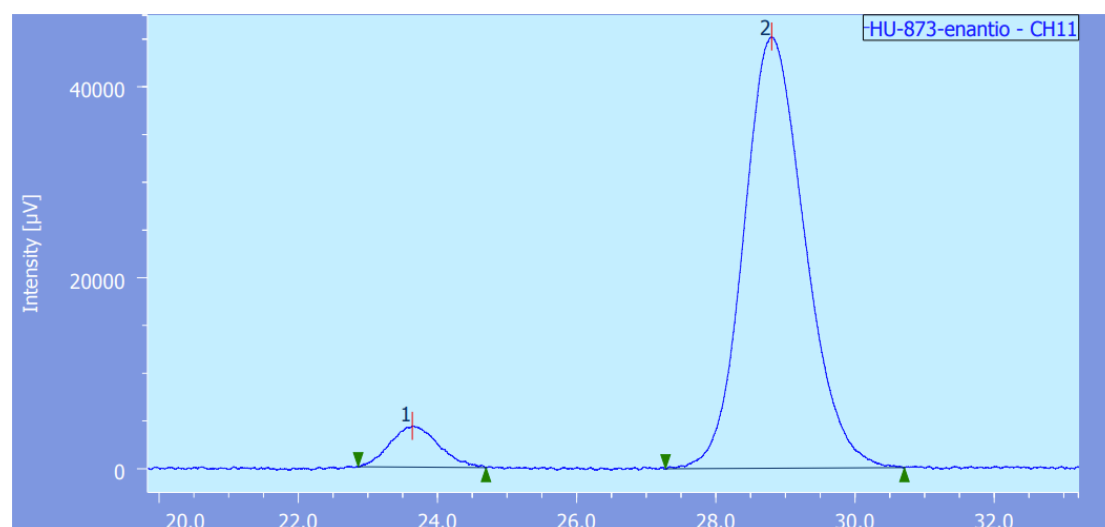

Decision

| # | Peak Name | CH | tR [min] | Area [ $\mu V \cdot sec$ ] | Height [ $\mu V$ ] | Area%  | Height% | Quantity | NTP  | Resolution | Symmetry Factor | Warning |
|---|-----------|----|----------|----------------------------|--------------------|--------|---------|----------|------|------------|-----------------|---------|
| 1 | Unknown   | 11 | 23.637   | 209577                     | 4308               | 7.063  | 8.702   | N/A      | 5517 | 3.617      | 1.207           |         |
| 2 | Unknown   | 11 | 28.800   | 2757690                    | 45199              | 92.937 | 91.298  | N/A      | 5250 | N/A        | 1.146           |         |

### *tert*-Butyl (*R*)-3-cyclohexyl-2-(4-phenoxyphenyl)propanoate (15)

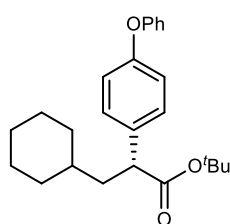

Prepared by **GP-B**. Colorless oil, 47.1 mg, 62% yield.  $^1H$  NMR (400 MHz,  $CDCl_3$ )  $\delta$  7.28 – 7.22 (m, 2H), 7.21 – 7.16 (m, 2H), 7.05 – 6.98 (m, 1H), 6.96 – 6.90 (m, 2H), 6.89 – 6.83 (m, 2H), 3.48 (dd,  $J = 8.5, 7.2$  Hz, 1H), 1.85 (ddd,  $J = 13.7, 8.6, 6.8$  Hz, 1H), 1.71 – 1.46 (m, 6H), 1.33 (s, 9H), 1.17 – 1.03 (m, 4H), 0.91 – 0.78 (m, 2H);  $^{13}C$  NMR (101 MHz,  $CDCl_3$ )  $\delta$  173.6, 157.2, 156.0, 135.0, 129.7, 129.1, 123.2, 118.8, 118.7, 80.4, 49.2, 41.3, 35.4,

33.18, 33.15, 28.0, 26.5, 26.18, 26.16. IR (film):  $\nu$  (cm<sup>-1</sup>) 2977, 2923, 2851, 2159, 2030, 1976, 1726, 1589, 1504, 1488, 1448, 1366, 1237, 1143, 1129, 970, 870, 844, 752, 692, 524, 511, 483, 418; HR-MS (ESI)  $m/z$  calcd for C<sub>25</sub>H<sub>32</sub>NaO<sub>3</sub><sup>+</sup> [M+Na<sup>+</sup>] 403.22437, found 403.22436;  $[\alpha]_D^{22.3} = -28.1$  (c = 0.1, CHCl<sub>3</sub>); HPLC conditions: NR column, hexane/2-propanol = 99/1, flow rate = 1.0 mL/min,  $\lambda = 240$  nm,  $t_R = 8.9$  min (minor),  $t_R = 11.7$  min (major), 96:4 er.

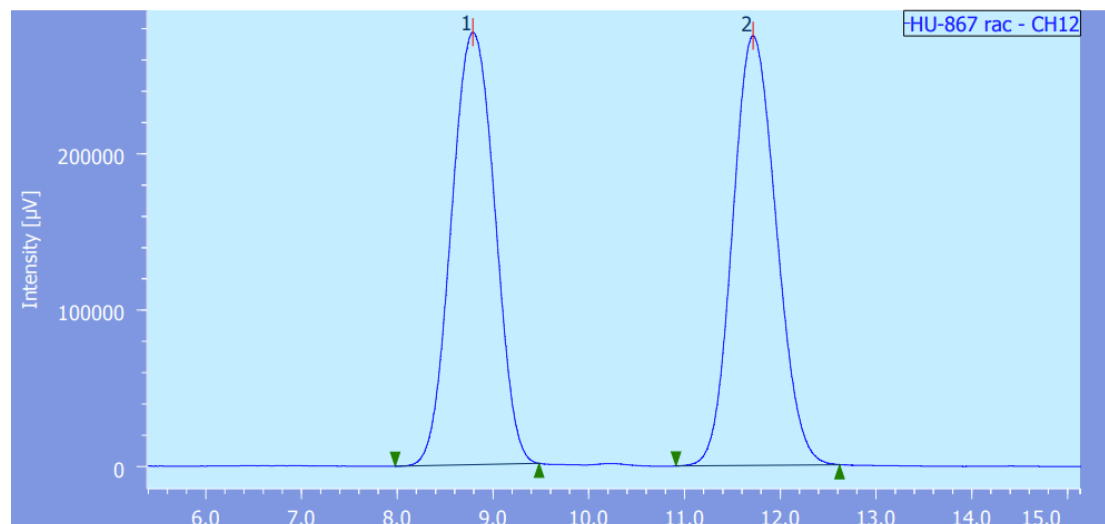

Decision

| # | Peak Name | CH | tR [min] | Area [ $\mu$ V-sec] | Height [ $\mu$ V] | Area%  | Height% | Quantity | NTP  | Resolution | Symmetry Factor | Warning |
|---|-----------|----|----------|---------------------|-------------------|--------|---------|----------|------|------------|-----------------|---------|
| 1 | Unknown   | 12 | 8.790    | 8727390             | 276485            | 50.001 | 50.157  | N/A      | 1660 | 3.427      | 1.019           |         |
| 2 | Unknown   | 12 | 11.713   | 8727026             | 274759            | 49.999 | 49.843  | N/A      | 3056 | N/A        | 1.114           |         |

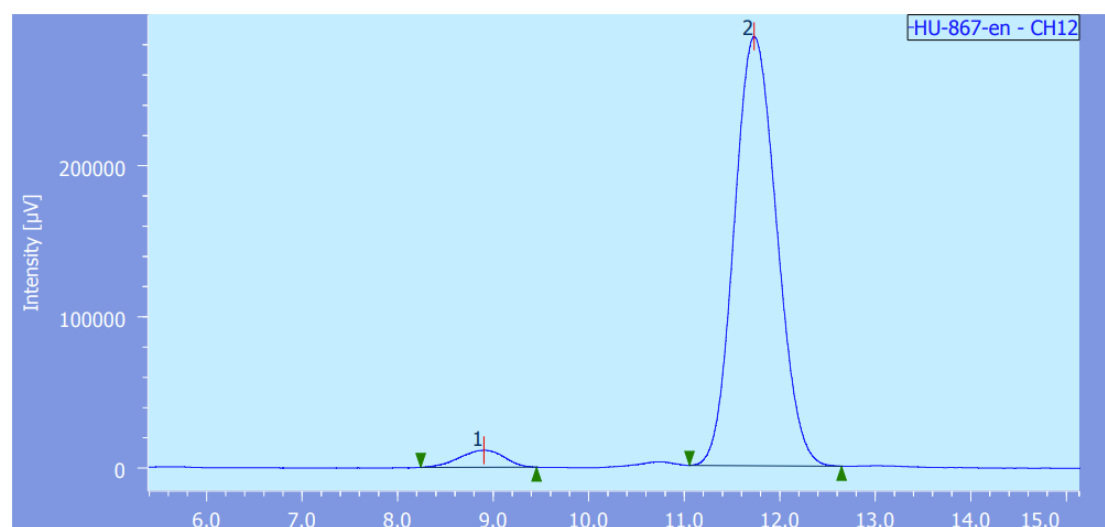

Decision

| # | Peak Name | CH | tR [min] | Area [ $\mu$ V-sec] | Height [ $\mu$ V] | Area%  | Height% | Quantity | NTP  | Resolution | Symmetry Factor | Warning |
|---|-----------|----|----------|---------------------|-------------------|--------|---------|----------|------|------------|-----------------|---------|
| 1 | Unknown   | 12 | 8.903    | 372190              | 11270             | 4.078  | 3.819   | N/A      | 1559 | 3.279      | 0.900           |         |
| 2 | Unknown   | 12 | 11.730   | 8755247             | 283807            | 95.922 | 96.181  | N/A      | 3221 | N/A        | 1.107           |         |

### *tert*-Butyl (*R*)-3-cyclohexyl-2-(4-methoxyphenyl)propanoate (16)

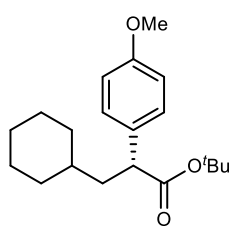

Prepared by **GP-B** (two 40 W 390 nm Kessile lamps were used). Colorless oil, 37.5 mg, 59% yield. <sup>1</sup>H NMR (400 MHz, CDCl<sub>3</sub>)  $\delta$  7.25 – 7.18 (m, 2H), 6.87 – 6.81 (m, 2H), 3.79 (s, 3H), 3.55 – 3.48 (m, 1H), 1.89 (ddd,  $J = 13.7, 8.3, 7.0$  Hz, 1H), 1.77 – 1.51 (m, 6H), 1.39 (s, 9H), 1.23 – 1.09 (m, 4H), 0.97 – 0.83 (m, 2H); <sup>13</sup>C NMR (101 MHz, CDCl<sub>3</sub>)  $\delta$  173.9, 158.4, 132.2, 128.8, 113.8, 80.2, 55.2, 49.0, 41.2, 35.4, 33.2, 33.1, 28.0, 26.5, 26.19, 26.15. IR

(film):  $\nu$  ( $\text{cm}^{-1}$ ) 2978, 2922, 2850, 1724, 1612, 1510, 1447, 1390, 1366, 1303, 1248, 1177, 1143, 1127, 1037, 971, 843, 831, 796, 762, 583, 530, 466; HR-MS (ESI)  $m/z$  calcd for  $\text{C}_{20}\text{H}_{30}\text{NaO}_3^+$   $[\text{M}+\text{Na}^+]$  341.20872, found 340.20842;  $[\alpha]_D^{22.5} = -29.5$  ( $c = 0.1$ ,  $\text{CHCl}_3$ ); HPLC conditions: NR column, hexane/2-propanol = 99/1, flow rate = 1.0 mL/min,  $\lambda = 240$  nm,  $t_R = 11.9$  min (minor),  $t_R = 16.9$  min (major), 93:7 er.

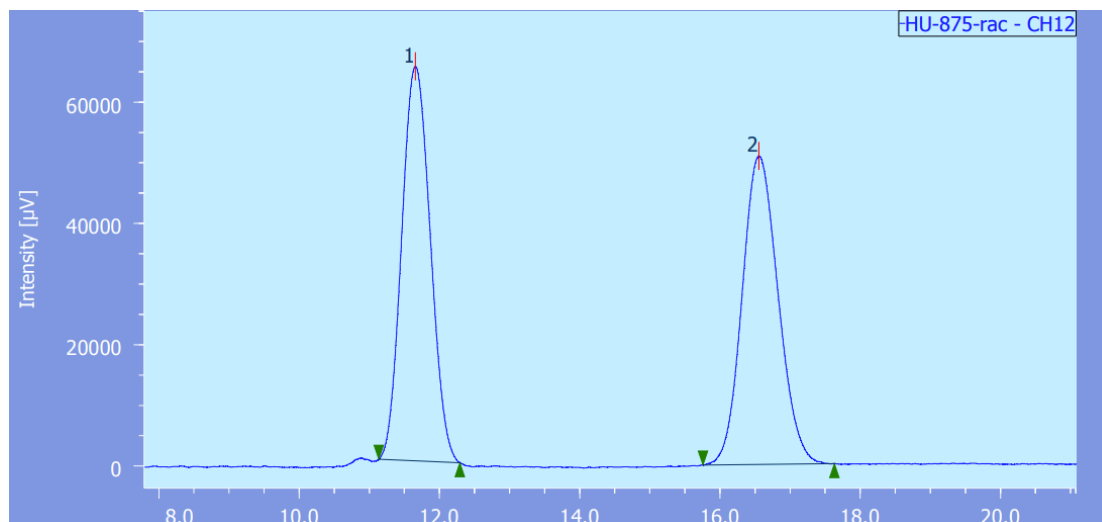

Decision

| # | Peak Name | CH | tR [min] | Area [ $\mu\text{V}\cdot\text{sec}$ ] | Height [ $\mu\text{V}$ ] | Area%  | Height% | Quantity | NTP  | Resolution | Symmetry Factor | Warning |
|---|-----------|----|----------|---------------------------------------|--------------------------|--------|---------|----------|------|------------|-----------------|---------|
| 1 | Unknown   | 12 | 11.657   | 1841788                               | 64980                    | 50.410 | 56.102  | N/A      | 3692 | 5.748      | 1.083           |         |
| 2 | Unknown   | 12 | 16.553   | 1811849                               | 50844                    | 49.590 | 43.898  | N/A      | 4953 | N/A        | 1.117           |         |

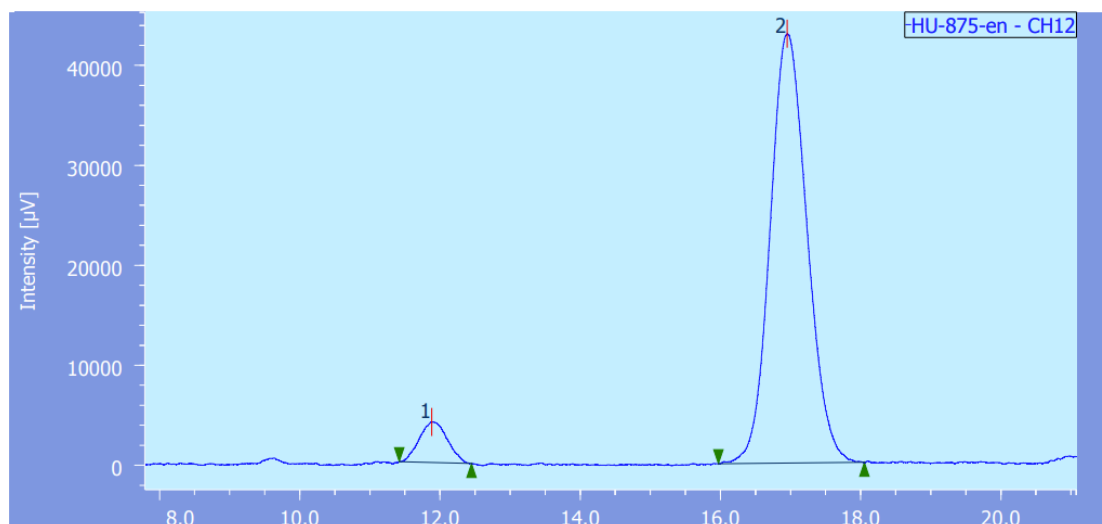

Decision

| # | Peak Name | CH | tR [min] | Area [ $\mu\text{V}\cdot\text{sec}$ ] | Height [ $\mu\text{V}$ ] | Area%  | Height% | Quantity | NTP  | Resolution | Symmetry Factor | Warning |
|---|-----------|----|----------|---------------------------------------|--------------------------|--------|---------|----------|------|------------|-----------------|---------|
| 1 | Unknown   | 12 | 11.880   | 113740                                | 4059                     | 6.745  | 8.642   | N/A      | 3885 | 5.895      | 1.096           |         |
| 2 | Unknown   | 12 | 16.950   | 1572639                               | 42908                    | 93.255 | 91.358  | N/A      | 4965 | N/A        | 1.112           |         |

### *tert*-Butyl (*R*)-3-cyclohexyl-2-(4-(methylthio)phenyl)propanoate (**17**)

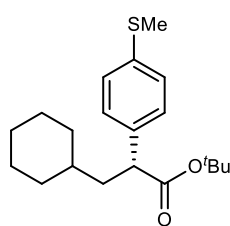

Prepared by **GP-B** (two 40 W 390 nm Kessile lamps were used). Colorless oil, 16.8 mg, 25% yield.  $^1\text{H}$  NMR (400 MHz,  $\text{CDCl}_3$ )  $\delta$  7.24 – 7.17 (m, 4H), 3.52 (t,  $J = 7.8$  Hz, 1H), 2.47 (s, 3H), 1.93 – 1.84 (m, 1H), 1.75 – 1.53 (m, 6H), 1.38 (s, 9H), 1.20 – 1.08 (m, 4H), 0.96 – 0.84 (m, 2H);  $^{13}\text{C}$  NMR (101 MHz,  $\text{CDCl}_3$ )  $\delta$  173.5, 137.0, 136.6, 128.4, 126.7, 80.5, 49.3, 41.1, 35.3, 33.2, 33.0, 28.0, 26.5, 26.2, 26.1, 15.9. IR (film):

$\nu$  ( $\text{cm}^{-1}$ ) 2977, 2920, 2849, 2362, 1725, 1597, 1493, 1478, 1447, 1407, 1390, 1366, 1324, 1272, 1256, 1144, 1092, 1015, 968, 845, 820, 770, 718, 567, 508, 473; HR-MS (ESI)  $m/z$  calcd for  $\text{C}_{20}\text{H}_{30}\text{NaO}_2\text{S}^+$  [ $\text{M}+\text{Na}^+$ ] 357.18587, found 357.18585;  $[\alpha]_{\text{D}}^{22.5} = -32.0$  ( $c = 0.1$ ,  $\text{CHCl}_3$ ); HPLC conditions: NR column, hexane/2-propanol = 99/1, flow rate = 1.0 mL/min,  $\lambda = 240$  nm,  $t_{\text{R}} = 12.5$  min (minor),  $t_{\text{R}} = 21.3$  min (major), 94:6 er.

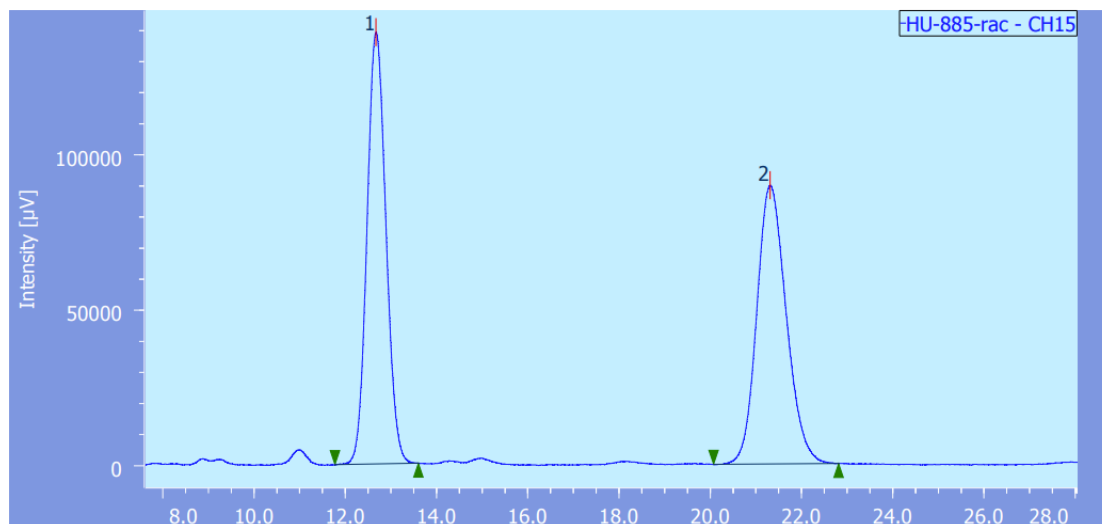

Decision

| # | Peak Name | CH | tR [min] | Area [ $\mu\text{V}\cdot\text{sec}$ ] | Height [ $\mu\text{V}$ ] | Area%  | Height% | Quantity | NTP  | Resolution | Symmetry Factor | Warning |
|---|-----------|----|----------|---------------------------------------|--------------------------|--------|---------|----------|------|------------|-----------------|---------|
| 1 | Unknown   | 15 | 12.673   | 4004074                               | 138833                   | 49.880 | 60.773  | N/A      | 4423 | 8.951      | 1.087           |         |
| 2 | Unknown   | 15 | 21.307   | 4023400                               | 89612                    | 50.120 | 39.227  | N/A      | 5289 | N/A        | 1.168           |         |

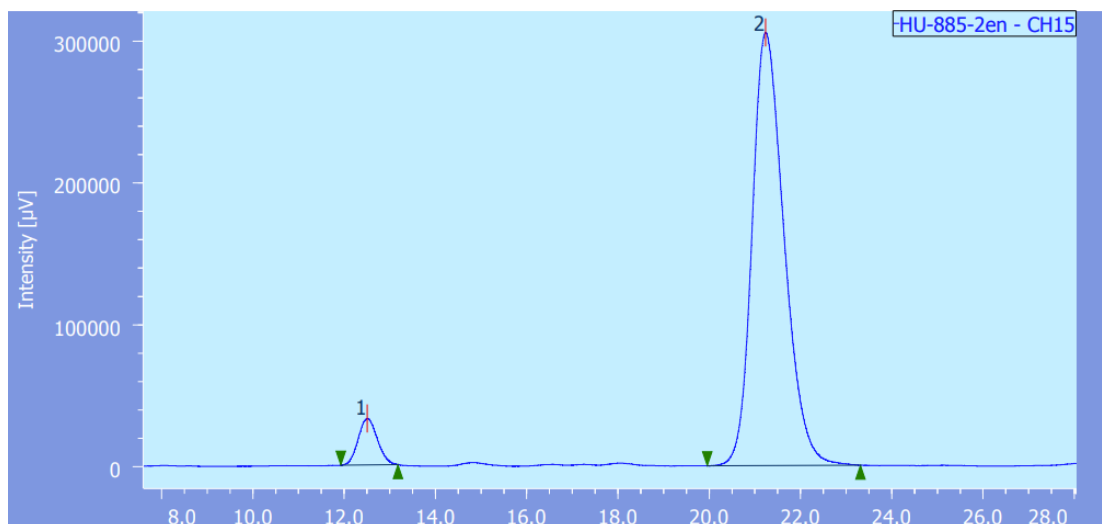

Decision

| # | Peak Name | CH | tR [min] | Area [ $\mu\text{V}\cdot\text{sec}$ ] | Height [ $\mu\text{V}$ ] | Area%  | Height% | Quantity | NTP  | Resolution | Symmetry Factor | Warning |
|---|-----------|----|----------|---------------------------------------|--------------------------|--------|---------|----------|------|------------|-----------------|---------|
| 1 | Unknown   | 15 | 12.507   | 959021                                | 32728                    | 6.063  | 9.689   | N/A      | 4102 | 8.565      | 1.092           |         |
| 2 | Unknown   | 15 | 21.230   | 14859341                              | 305064                   | 93.937 | 90.311  | N/A      | 4533 | N/A        | 1.265           |         |

### *tert*-Butyl (*R*)-3-cyclohexyl-2-(2-fluorophenyl)propanoate (**18**)

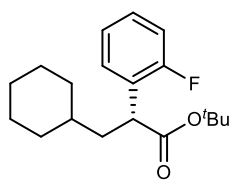

Prepared by **GP-A**. Colorless oil, 30.1 mg, 49% yield.  $^1\text{H}$  NMR (400 MHz,  $\text{CDCl}_3$ )  $\delta$  7.35 (td,  $J = 7.6, 1.8$  Hz, 1H), 7.24 – 7.16 (m, 1H), 7.09 (td,  $J = 7.5, 1.2$  Hz, 1H), 7.06 – 6.98 (m, 1H), 3.96 (t,  $J = 7.8$  Hz, 1H), 1.92 (dt,  $J = 13.9, 7.6$  Hz, 1H), 1.78 – 1.55 (m, 6H), 1.40 (s, 9H), 1.20 – 1.11 (m, 4H), 0.97 – 0.85 (m, 2H);  $^{13}\text{C}$  NMR (101 MHz,  $\text{CDCl}_3$ )  $\delta$  173.0, 160.5 (d,  $J = 246.6$  Hz), 128.8 (d,  $J = 4.1$  Hz), 128.2 (d,  $J = 8.4$  Hz), 127.3 (d,  $J = 15.0$  Hz), 124.1 (d,  $J = 3.5$  Hz),

115.2 (d,  $J = 22.8$  Hz), 80.6, 41.7 (d,  $J = 2.5$  Hz), 40.2, 35.4, 33.2, 33.0, 27.9, 26.5, 26.2, 26.1;  $^{19}\text{F}$  NMR (377 MHz,  $\text{CDCl}_3$ )  $\delta$  -118.46. IR (film):  $\nu$  ( $\text{cm}^{-1}$ ) 2977, 2923, 2851, 1728, 1492, 1449, 1391, 1366, 1273, 1250, 1230, 1175, 1146, 1130, 1035, 970, 843, 823, 754, 475; HR-MS (ESI)  $m/z$  calcd for  $\text{C}_{19}\text{H}_{27}\text{FNaO}_2^+$  [ $\text{M}+\text{Na}^+$ ] 329.18873, found 329.18879;  $[\alpha]_{\text{D}}^{23.7} = -28.8$  ( $c = 0.1$ ,  $\text{CHCl}_3$ ); HPLC conditions (er was determined by reducing the product to the corresponding alcohol with  $\text{LiAlH}_4$ ): Chiral-NR column, hexane/2-propanol = 95/5, flow rate = 1.0 mL/min,  $\lambda = 210$  nm,  $t_{\text{R}} = 7.0$  min (minor),  $t_{\text{R}} = 7.9$  min (major), 93:7 er.

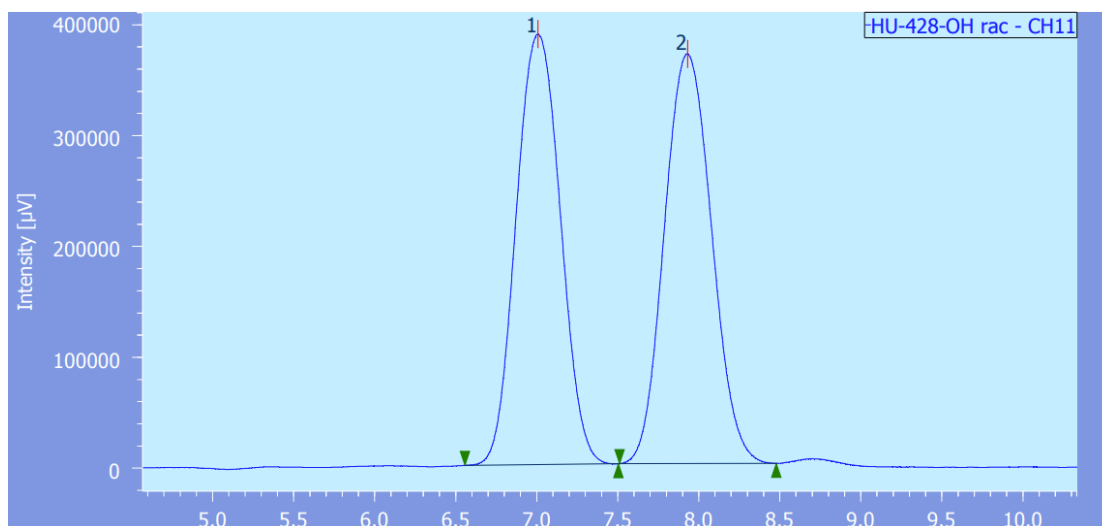

Decision

| # | Peak Name | CH | tR [min] | Area [ $\mu\text{V}\cdot\text{sec}$ ] | Height [ $\mu\text{V}$ ] | Area%  | Height% | Quantity | NTP  | Resolution | Symmetry Factor | Warning |
|---|-----------|----|----------|---------------------------------------|--------------------------|--------|---------|----------|------|------------|-----------------|---------|
| 1 | Unknown   | 11 | 7.007    | 7380487                               | 388214                   | 49.586 | 51.242  | N/A      | 2932 | 1.736      | 1.053           |         |
| 2 | Unknown   | 11 | 7.930    | 7503791                               | 369395                   | 50.414 | 48.758  | N/A      | 3342 | N/A        | 1.079           |         |

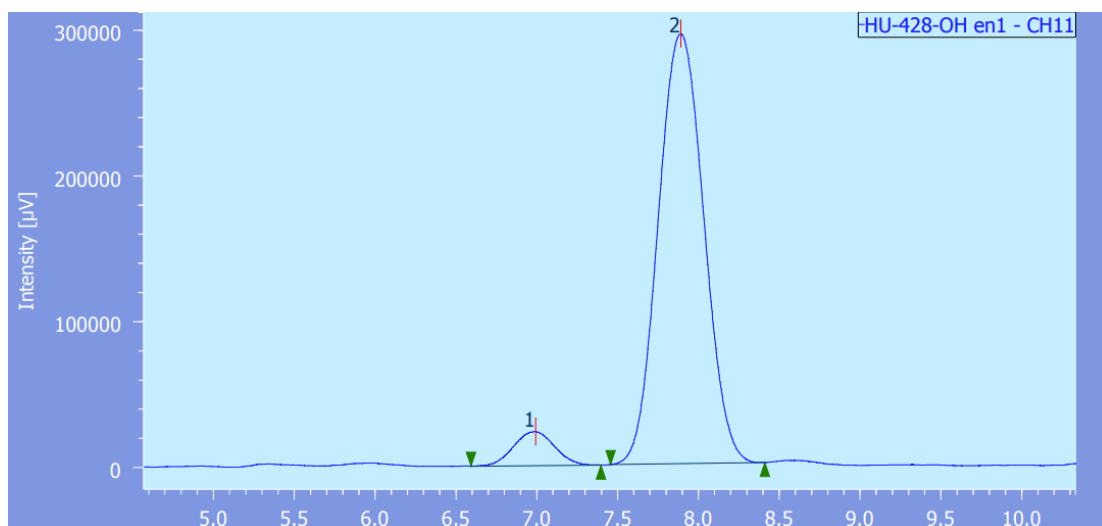

Decision

| # | Peak Name | CH | tR [min] | Area [ $\mu\text{V}\cdot\text{sec}$ ] | Height [ $\mu\text{V}$ ] | Area%  | Height% | Quantity | NTP  | Resolution | Symmetry Factor | Warning |
|---|-----------|----|----------|---------------------------------------|--------------------------|--------|---------|----------|------|------------|-----------------|---------|
| 1 | Unknown   | 11 | 6.993    | 412024                                | 23405                    | 6.660  | 7.355   | N/A      | 3500 | 1.794      | 0.992           |         |
| 2 | Unknown   | 11 | 7.890    | 5774602                               | 294795                   | 93.340 | 92.645  | N/A      | 3550 | N/A        | 1.053           |         |

**tert-Butyl (R)-2-(4-chloro-2-fluorophenyl)-3-cyclohexylpropanoate (19)**

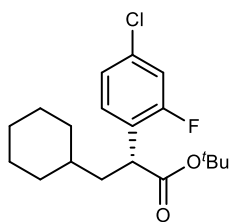

Prepared by **GP-A**. Colorless oil, 34.1 mg, 50% yield.  $^1\text{H}$  NMR (400 MHz,  $\text{CDCl}_3$ )  $\delta$  7.33 – 7.27 (m, 1H), 7.13 – 7.02 (m, 2H), 3.91 (t,  $J = 7.8$  Hz, 1H), 1.89 (dt,  $J = 13.8, 7.6$  Hz, 1H), 1.77 – 1.52 (m, 6H), 1.39 (s, 9H), 1.20 – 1.06 (m, 4H), 0.98 – 0.83 (m, 2H);  $^{13}\text{C}$  NMR (101 MHz,  $\text{CDCl}_3$ )  $\delta$  172.54, 160.2 (d,  $J = 250.1$  Hz), 133.1 (d,  $J = 10.5$  Hz), 129.7 (d,  $J = 4.9$  Hz), 125.9 (d,  $J = 15.2$  Hz), 124.5 (d,  $J = 3.5$  Hz), 116.1 (d,  $J = 26.5$  Hz), 81.0, 41.4 (d,  $J = 2.1$  Hz), 40.1, 35.4, 33.3, 32.9, 27.9, 26.4, 26.14, 26.09;  $^{19}\text{F}$  NMR (377 MHz,  $\text{CDCl}_3$ )  $\delta$  -115.72. IR (film):  $\nu$  ( $\text{cm}^{-1}$ ) 2978, 2924, 2853, 1728, 1608, 1579, 1488, 1447, 1410, 1392, 1367, 1257, 1223, 1175, 1147, 1131, 1109, 1078, 972, 896, 854, 763, 592, 477; HR-MS (ESI)  $m/z$  calcd for  $\text{C}_{19}\text{H}_{26}\text{ClFN}_2\text{O}_2^+$  [ $\text{M}+\text{Na}^+$ ] 363.14976, found 363.14976;  $[\alpha]_{\text{D}}^{23.8} = -31.9$  ( $c = 0.1$ ,  $\text{CHCl}_3$ ); HPLC conditions: Chiral-NR column, hexane/2-propanol = 99.8/0.2, flow rate = 0.5 mL/min,  $\lambda = 220$  nm,  $t_{\text{R}} = 17.5$  min (minor),  $t_{\text{R}} = 20.3$  min (major), 95:5 er.

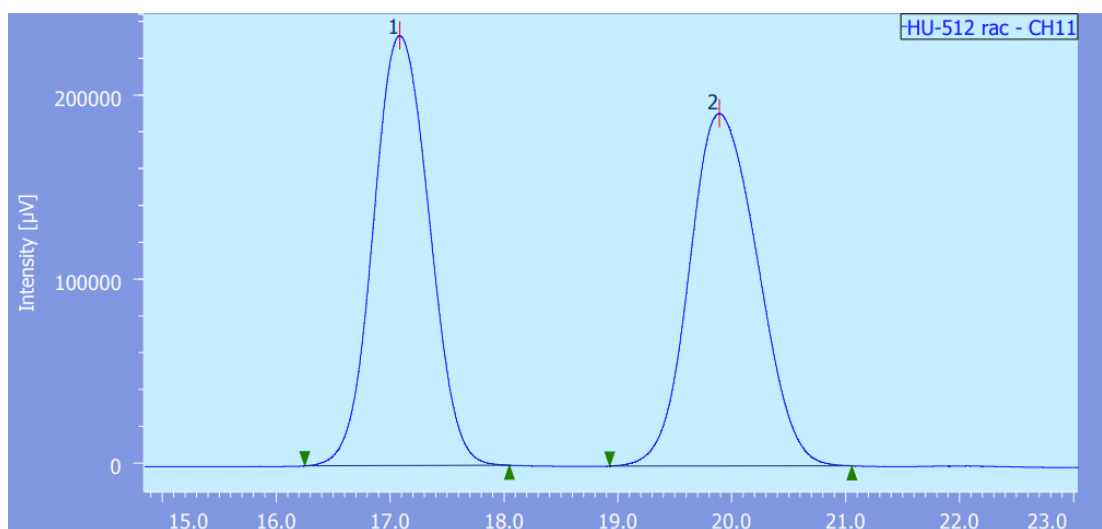

Decision

| # | Peak Name | CH | tR [min] | Area [µV·sec] | Height [µV] | Area%  | Height% | Quantity | NTP  | Resolution | Symmetry Factor | Warning |
|---|-----------|----|----------|---------------|-------------|--------|---------|----------|------|------------|-----------------|---------|
| 1 | Unknown   | 11 | 17.083   | 7972649       | 233467      | 49.913 | 54.949  | N/A      | 5550 | 2.752      | 1.058           |         |
| 2 | Unknown   | 11 | 19.890   | 8000505       | 191409      | 50.087 | 45.051  | N/A      | 4975 | N/A        | 1.125           |         |

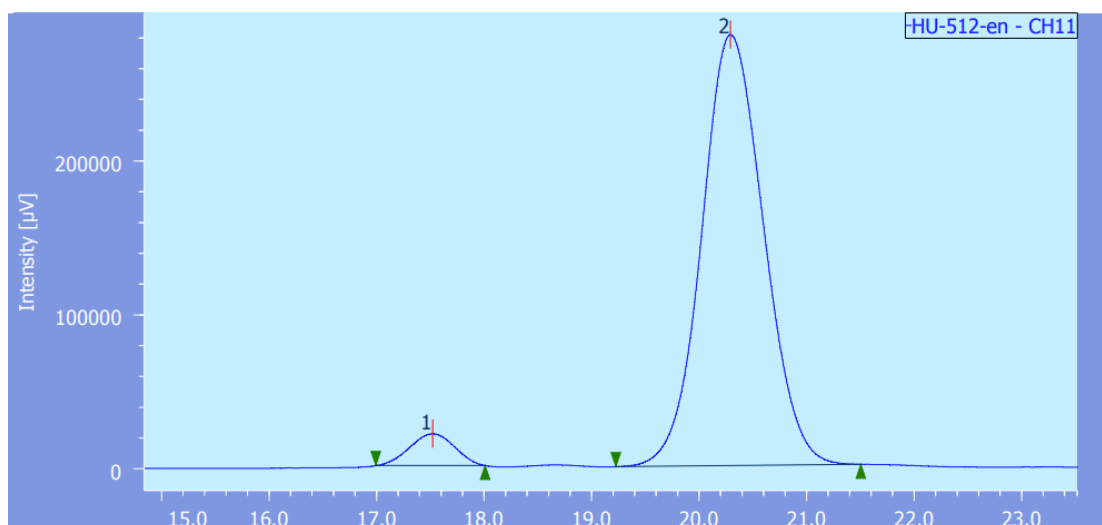

## Decision

| # | Peak Name | CH | tR [min] | Area [ $\mu$ V-sec] | Height [ $\mu$ V] | Area%  | Height% | Quantity | NTP  | Resolution | Symmetry Factor | Warning |
|---|-----------|----|----------|---------------------|-------------------|--------|---------|----------|------|------------|-----------------|---------|
| 1 | Unknown   | 11 | 17.520   | 601712              | 20697             | 5.098  | 6.885   | N/A      | 7725 | 3.005      | 0.974           |         |
| 2 | Unknown   | 11 | 20.290   | 11202117            | 279911            | 94.902 | 93.115  | N/A      | 5963 | N/A        | 1.073           |         |

***tert*-Butyl (*R*)-3-cyclohexyl-2-(3-fluorophenyl)propanoate (20)**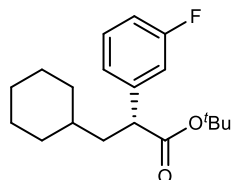

Prepared by **GP-A**. Colorless oil, 41.6 mg, 68% yield.  $^1\text{H}$  NMR (400 MHz,  $\text{CDCl}_3$ )  $\delta$  7.29 – 7.22 (m, 1H), 7.09 – 6.99 (m, 2H), 6.96 – 6.89 (m, 1H), 3.57 (t,  $J = 8.0$  Hz, 1H), 1.91 (ddd,  $J = 13.7, 8.4, 7.0$  Hz, 1H), 1.75 – 1.53 (m, 6H), 1.39 (s, 9H), 1.21 – 1.10 (m, 4H), 0.97 – 0.84 (m, 2H);  $^{13}\text{C}$  NMR (101 MHz,  $\text{CDCl}_3$ )  $\delta$  173.0, 162.8 (d,  $J = 246.5$  Hz), 142.6 (d,  $J = 7.6$  Hz), 129.7 (d,  $J = 8.6$  Hz), 123.6 (d,  $J = 2.6$  Hz), 114.8 (d,  $J = 22.0$  Hz), 113.7 (d,  $J = 21.0$  Hz), 80.7, 49.6, 41.1, 35.4, 33.2, 33.1, 27.9, 26.5, 26.2, 26.1;  $^{19}\text{F}$  NMR (377 MHz,  $\text{CDCl}_3$ )  $\delta$  -113.28. IR (film):  $\nu$  ( $\text{cm}^{-1}$ ) 2977, 2923, 2852, 1727, 1614, 1590, 1486, 1448, 1391, 1367, 1253, 1146, 1140, 958, 888, 872, 843, 783, 774, 760, 690, 522; HR-MS (ESI)  $m/z$  calcd for  $\text{C}_{19}\text{H}_{27}\text{FNaO}_2^+$  [ $\text{M}+\text{Na}^+$ ] 329.18873, found 329.18871;  $[\alpha]_{\text{D}}^{23.7} = -26.6$  ( $c = 0.1$ ,  $\text{CHCl}_3$ ); HPLC conditions: Chiral-NR column, hexane/2-propanol = 99.8/0.2, flow rate = 0.5 mL/min,  $\lambda = 230$  nm,  $t_{\text{R}} = 16.6$  min (major),  $t_{\text{R}} = 18.1$  min (minor), 93:7 er.

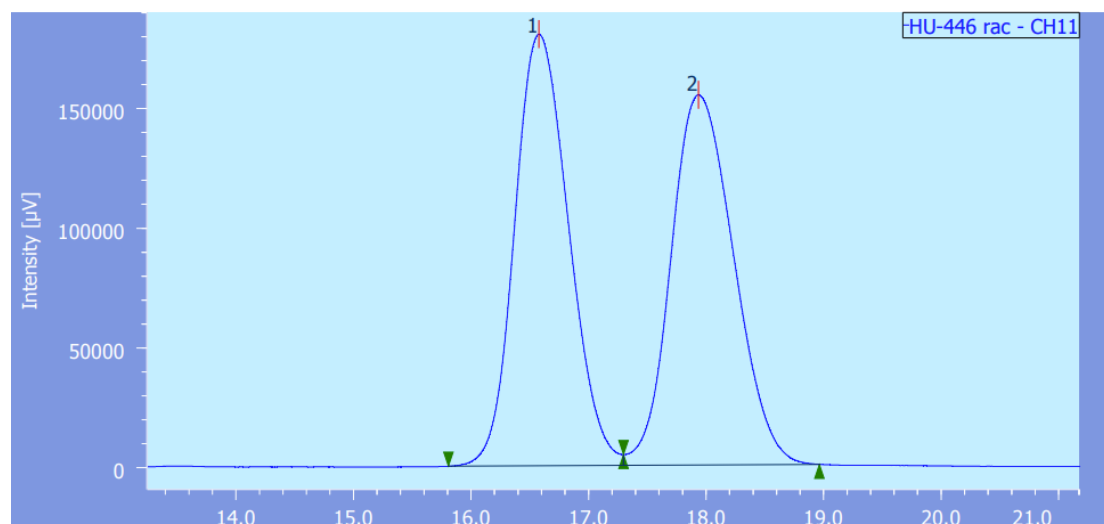

## Decision

| # | Peak Name | CH | tR [min] | Area [ $\mu$ V-sec] | Height [ $\mu$ V] | Area%  | Height% | Quantity | NTP  | Resolution | Symmetry Factor | Warning |
|---|-----------|----|----------|---------------------|-------------------|--------|---------|----------|------|------------|-----------------|---------|
| 1 | Unknown   | 11 | 16.577   | 5753888             | 180270            | 50.036 | 53.833  | N/A      | 6087 | 1.476      | 1.154           |         |
| 2 | Unknown   | 11 | 17.933   | 5745549             | 154602            | 49.964 | 46.167  | N/A      | 5209 | N/A        | 1.153           |         |



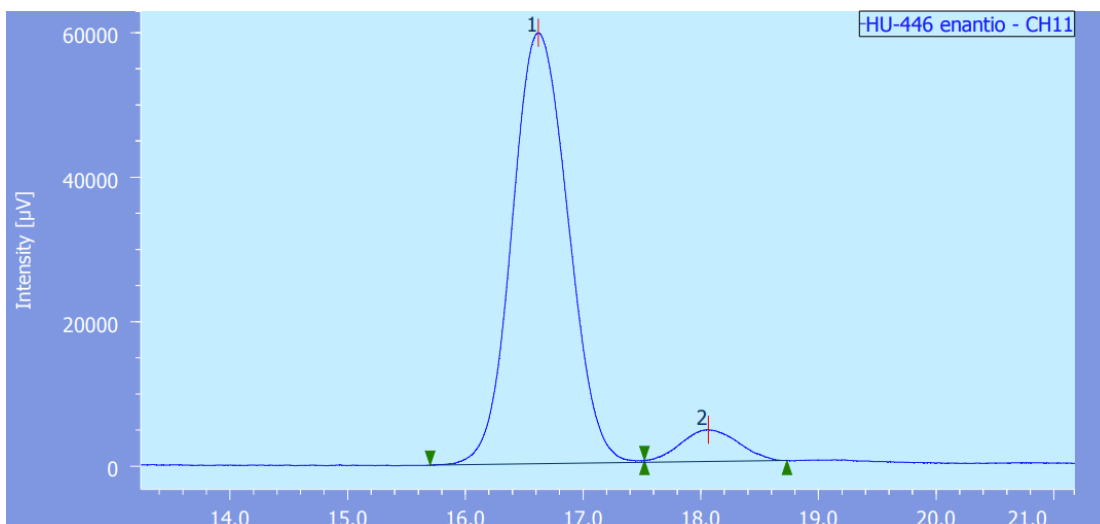

Decision

| # | Peak Name | CH | tR [min] | Area [µV·sec] | Height [µV] | Area%  | Height% | Quantity | NTP  | Resolution | Symmetry Factor | Warning |
|---|-----------|----|----------|---------------|-------------|--------|---------|----------|------|------------|-----------------|---------|
| 1 | Unknown   | 11 | 16.620   | 1971159       | 59613       | 92.865 | 93.133  | N/A      | 5647 | 1.587      | 1.073           |         |
| 2 | Unknown   | 11 | 18.063   | 151437        | 4396        | 7.135  | 6.867   | N/A      | 5920 | N/A        | N/A             |         |

### *tert*-Butyl (*R*)-2-(4-chloro-3-fluorophenyl)-3-cyclohexylpropanoate (**21**)

Prepared by GP-A. White solid, 47.5 mg, 70% yield. m.p. = 73-74 °C; <sup>1</sup>H NMR (400 MHz, CDCl<sub>3</sub>) δ 7.31 (t, *J* = 8.0 Hz, 1H), 7.12 (dd, *J* = 10.2, 2.0 Hz, 1H), 7.02 (dd, *J* = 8.3, 1.6 Hz, 1H), 3.54 (t, *J* = 7.8 Hz, 1H), 1.88 (ddd, *J* = 13.7, 8.2, 7.2 Hz, 1H), 1.76 – 1.51 (m, 6H), 1.39 (s, 9H), 1.20 – 1.07 (m, 4H), 0.96 – 0.84 (m, 2H); <sup>13</sup>C NMR (101 MHz, CDCl<sub>3</sub>) δ 172.6, 158.0 (d, *J* = 249.4 Hz), 140.9 (d, *J* = 6.6 Hz), 130.35, 124.4 (d, *J* = 3.5 Hz), 119.3 (d, *J* = 17.8 Hz), 116.1 (d, *J* = 21.5 Hz), 81.0, 49.3 (d, *J* = 1.2 Hz), 41.0, 35.3, 33.2, 33.0, 27.9, 26.4, 26.11, 26.07; <sup>19</sup>F NMR (377 MHz, CDCl<sub>3</sub>) δ -115.39. IR (film): ν (cm<sup>-1</sup>) 2978, 2924, 2904, 2850, 1717, 1578, 1485, 1449, 1428, 1368, 1340, 1315, 1273, 1257, 1229, 1221, 1137, 1063, 963, 884, 839, 814, 757, 702, 608, 551, 505, 459; HR-MS (ESI) *m/z* calcd for C<sub>19</sub>H<sub>26</sub>ClFNaO<sub>2</sub><sup>+</sup> [M+Na<sup>+</sup>] 363.14976, found 363.14984; [α]<sub>D</sub><sup>23.8</sup> = -24.8 (c = 0.1, CHCl<sub>3</sub>); HPLC conditions: Chiral-NR column, hexane/2-propanol = 99.8/0.2, flow rate = 0.5 mL/min, λ = 220 nm, t<sub>R</sub> = 19.2 min (minor), t<sub>R</sub> = 20.6 min (major), 95:5 er.

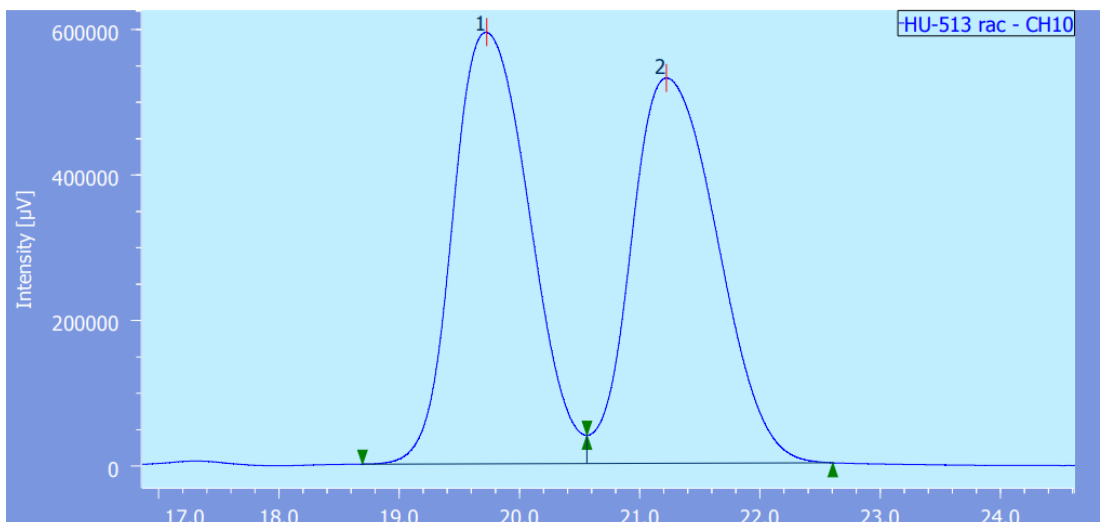

## Decision

| # | Peak Name | CH | tR [min] | Area [ $\mu\text{V}\cdot\text{sec}$ ] | Height [ $\mu\text{V}$ ] | Area%  | Height% | Quantity | NTP  | Resolution | Symmetry Factor | Warning |
|---|-----------|----|----------|---------------------------------------|--------------------------|--------|---------|----------|------|------------|-----------------|---------|
| 1 | Unknown   | 10 | 19.727   | 26184788                              | 592833                   | 49.773 | 52.830  | N/A      | 4348 | 1.175      | N/A             |         |
| 2 | Unknown   | 10 | 21.220   | 26423254                              | 529324                   | 50.227 | 47.170  | N/A      | 3947 | N/A        | N/A             |         |

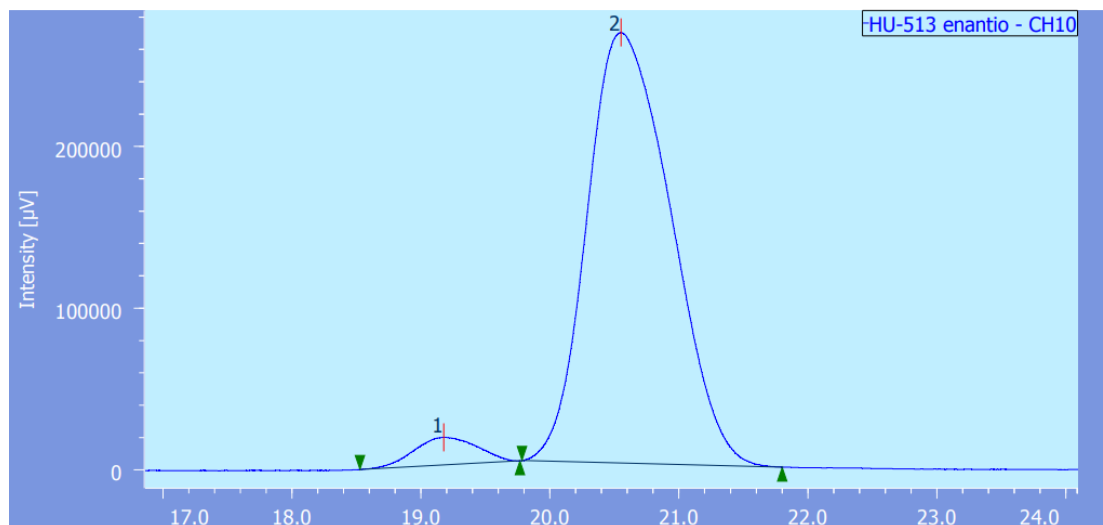

## Decision

| # | Peak Name | CH | tR [min] | Area [ $\mu\text{V}\cdot\text{sec}$ ] | Height [ $\mu\text{V}$ ] | Area%  | Height% | Quantity | NTP  | Resolution | Symmetry Factor | Warning |
|---|-----------|----|----------|---------------------------------------|--------------------------|--------|---------|----------|------|------------|-----------------|---------|
| 1 | Unknown   | 10 | 19.177   | 580071                                | 17000                    | 4.606  | 6.004   | N/A      | 6419 | 1.255      | 1.007           |         |
| 2 | Unknown   | 10 | 20.550   | 12014501                              | 266135                   | 95.394 | 93.996  | N/A      | 4410 | N/A        | 1.229           |         |

Dimethyl (*R*)-5-(1-(*tert*-butoxy)-3-cyclohexyl-1-oxopropan-2-yl)isophthalate (22)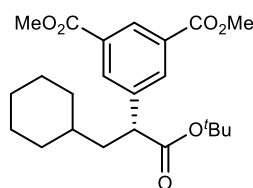

Prepared by GP-A. White solid, 63.4 mg, 78% yield. m.p. = 65-66 °C;  $^1\text{H}$  NMR (400 MHz,  $\text{CDCl}_3$ )  $\delta$  8.57 (t,  $J = 1.6$  Hz, 1H), 8.18 (d,  $J = 1.6$  Hz, 2H), 3.94 (s, 6H), 3.70 (dd,  $J = 8.2, 7.4$  Hz, 1H), 1.98 (ddd,  $J = 13.8, 8.4, 6.9$  Hz, 1H), 1.77 – 1.58 (m, 6H), 1.39 (s, 9H), 1.20 – 1.09 (m, 4H), 0.99 – 0.85 (m, 2H);  $^{13}\text{C}$  NMR (101 MHz,  $\text{CDCl}_3$ )  $\delta$  172.6, 166.2, 141.1, 133.4, 130.8, 129.4, 81.1, 52.4, 49.6, 41.1, 35.4, 33.1, 33.0, 27.9, 26.4, 26.11, 26.09. IR (film):  $\nu$  ( $\text{cm}^{-1}$ ) 2979, 2921, 2849, 1718, 1604, 1450, 1435, 1366, 1319, 1239, 1199, 1146, 1125, 1108, 1003, 964, 909, 851, 844, 747, 720, 470; HR-MS (ESI)  $m/z$  calcd for  $\text{C}_{23}\text{H}_{32}\text{NaO}_6^+$  [ $\text{M}+\text{Na}^+$ ] 427.20911, found 427.20915;  $[\alpha]_{\text{D}}^{23.9} = -8.2$  ( $c = 0.1$ ,  $\text{CHCl}_3$ ); HPLC conditions: Chiral-NR column, hexane/2-propanol = 98/2, flow rate = 1.0 mL/min,  $\lambda = 240$  nm,  $t_{\text{R}} = 27.9$  min (major),  $t_{\text{R}} = 35.0$  min (minor), 95:5 er.

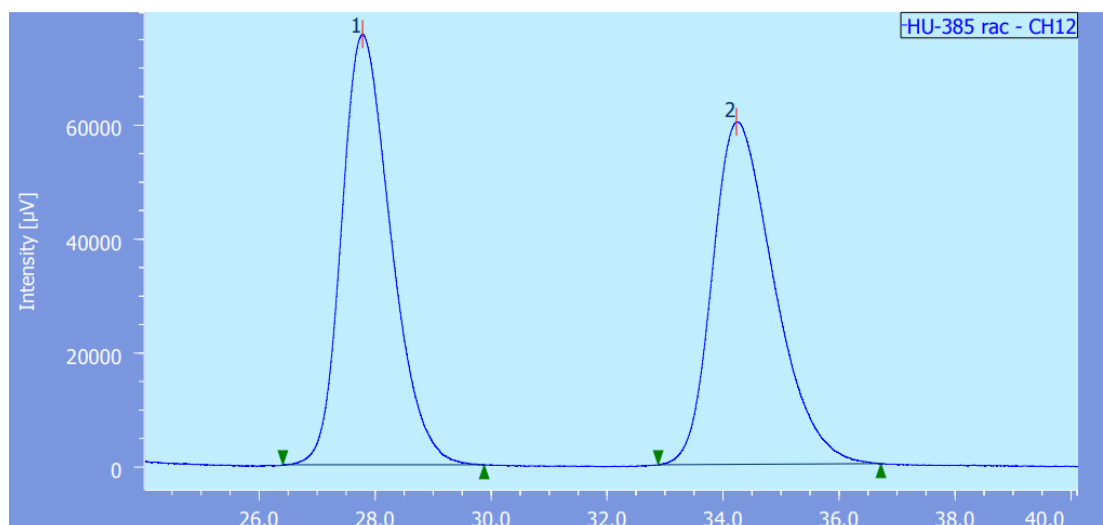

## Decision

| # | Peak Name | CH | tR [min] | Area [ $\mu\text{V}\cdot\text{sec}$ ] | Height [ $\mu\text{V}$ ] | Area%  | Height% | Quantity | NTP  | Resolution | Symmetry Factor | Warning |
|---|-----------|----|----------|---------------------------------------|--------------------------|--------|---------|----------|------|------------|-----------------|---------|
| 1 | Unknown   | 12 | 27.780   | 4467267                               | 75500                    | 50.029 | 55.689  | N/A      | 5193 | 3.719      | 1.281           |         |
| 2 | Unknown   | 12 | 34.230   | 4462026                               | 60075                    | 49.971 | 44.311  | N/A      | 5003 | N/A        | 1.385           |         |

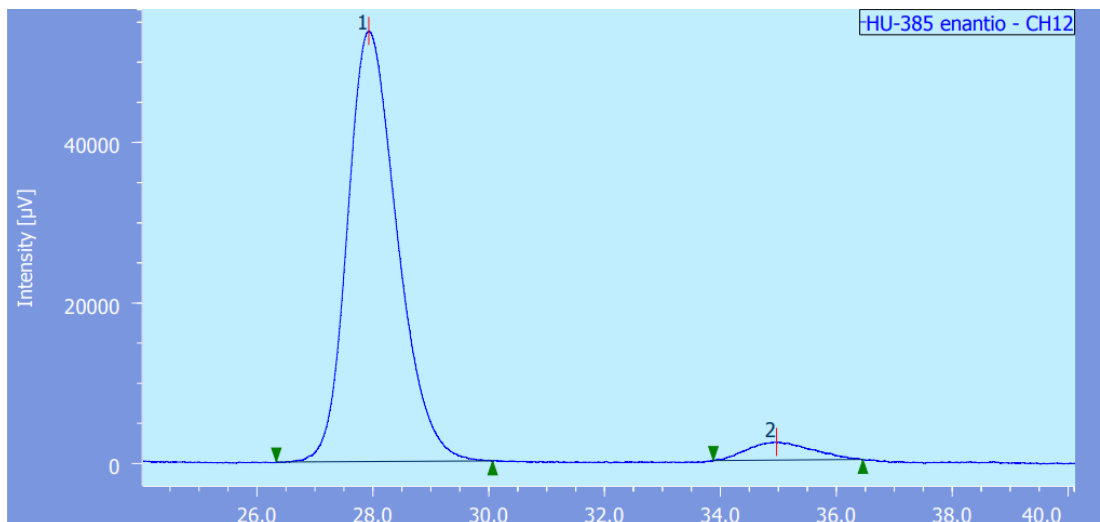

## Decision

| # | Peak Name | CH | tR [min] | Area [ $\mu\text{V}\cdot\text{sec}$ ] | Height [ $\mu\text{V}$ ] | Area%  | Height% | Quantity | NTP  | Resolution | Symmetry Factor | Warning |
|---|-----------|----|----------|---------------------------------------|--------------------------|--------|---------|----------|------|------------|-----------------|---------|
| 1 | Unknown   | 12 | 27.927   | 3199262                               | 53628                    | 94.792 | 95.942  | N/A      | 5211 | 3.766      | 1.261           |         |
| 2 | Unknown   | 12 | 34.967   | 175781                                | 2268                     | 5.208  | 4.058   | N/A      | 4038 | N/A        | 1.186           |         |

Methyl (*R*)-3-(1-(*tert*-butoxy)-3-cyclohexyl-1-oxopropan-2-yl)-5-chlorobenzoate (23)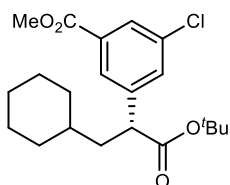

Prepared by **GP-A**. White solid, 51.8 mg, 68% yield. m.p. = 99-100 °C;  $^1\text{H}$  NMR (400 MHz,  $\text{CDCl}_3$ )  $\delta$  7.91 – 7.87 (m, 1H), 7.85 (t,  $J = 1.5$  Hz, 1H), 7.50 (t,  $J = 1.8$  Hz, 1H), 3.91 (s, 3H), 3.60 (dd,  $J = 8.4, 7.2$  Hz, 1H), 1.93 (ddd,  $J = 13.8, 8.5, 6.9$  Hz, 1H), 1.76 – 1.52 (m, 6H), 1.39 (s, 9H), 1.22 – 1.08 (m, 4H), 0.98 – 0.82 (m, 2H);  $^{13}\text{C}$  NMR (101 MHz,  $\text{CDCl}_3$ )  $\delta$  172.5, 165.8, 142.4, 134.5, 132.4, 131.8, 128.2, 127.5, 81.1, 52.4, 49.5, 41.1, 35.4, 33.1, 33.0, 27.9, 26.4, 26.08, 26.07. IR (film):  $\nu$  ( $\text{cm}^{-1}$ ) 2985, 2917, 2852, 1718, 1580, 1448, 1433, 1367, 1349, 1284, 1240, 1218, 1195, 1146, 1128, 1117, 996, 972, 882, 846, 796, 766, 754, 738, 703, 673, 625, 558, 502; HR-MS (ESI)  $m/z$  calcd for  $\text{C}_{21}\text{H}_{29}\text{ClNaO}_4^+$  [ $\text{M}+\text{Na}^+$ ] 403.16466, found 403.16469;  $[\alpha]_{\text{D}}^{23.9} = -10.8$  ( $c = 0.1$ ,  $\text{CHCl}_3$ ); HPLC conditions: Chiral-NR column, hexane/2-propanol = 98/2, flow rate = 1.0 mL/min,  $\lambda = 220$  nm,  $t_{\text{R}} = 8.2$  min (major),  $t_{\text{R}} = 9.7$  min (minor), 96:4 er.

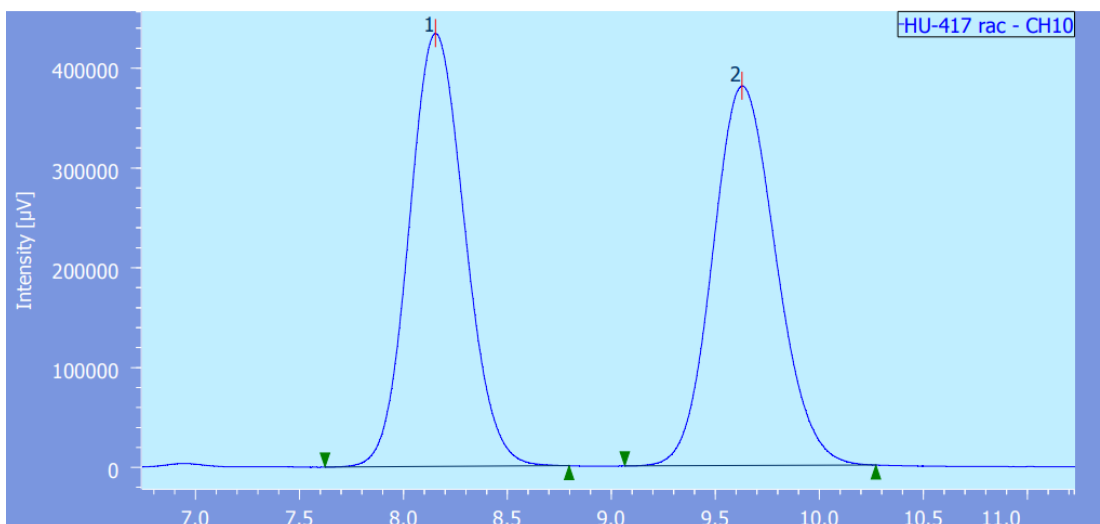

Decision

| # | Peak Name | CH | tR [min] | Area [μV·sec] | Height [μV] | Area%  | Height% | Quantity | NTP  | Resolution | Symmetry Factor | Warning |
|---|-----------|----|----------|---------------|-------------|--------|---------|----------|------|------------|-----------------|---------|
| 1 | Unknown   | 10 | 8.153    | 8082854       | 433913      | 50.006 | 53.295  | N/A      | 4388 | 2.806      | 1.100           |         |
| 2 | Unknown   | 10 | 9.627    | 8080996       | 380252      | 49.994 | 46.705  | N/A      | 4715 | N/A        | 1.127           |         |

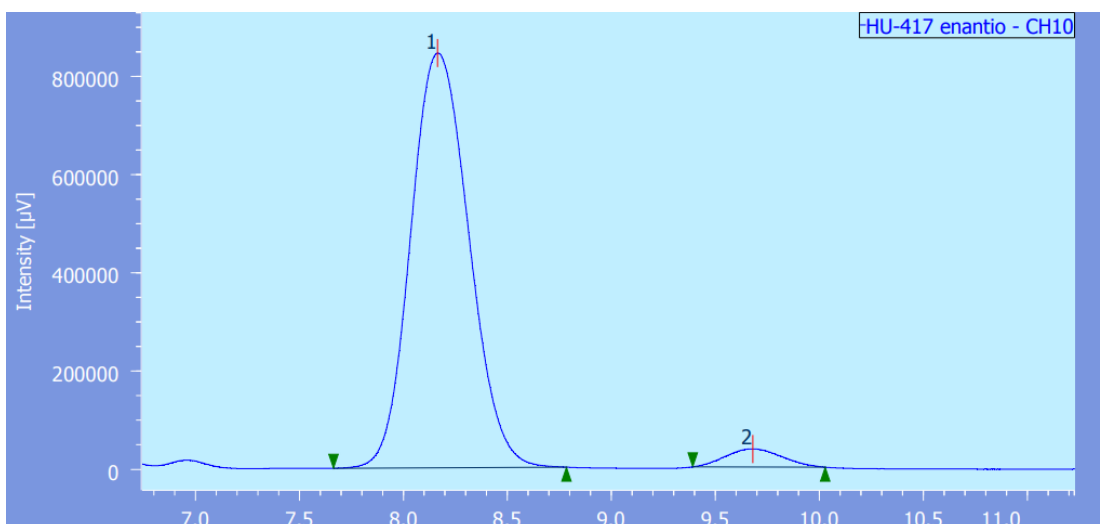

Decision

| # | Peak Name | CH | tR [min] | Area [μV·sec] | Height [μV] | Area%  | Height% | Quantity | NTP  | Resolution | Symmetry Factor | Warning |
|---|-----------|----|----------|---------------|-------------|--------|---------|----------|------|------------|-----------------|---------|
| 1 | Unknown   | 10 | 8.163    | 16420408      | 844200      | 95.947 | 95.820  | N/A      | 3957 | 2.928      | 1.128           |         |
| 2 | Unknown   | 10 | 9.680    | 693577        | 36829       | 4.053  | 4.180   | N/A      | 5553 | N/A        | 1.083           |         |

### *tert*-Butyl (*R*)-3-cyclohexyl-2-(naphthalen-2-yl)propanoate (**24**)

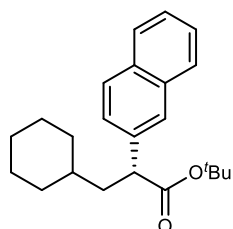

Prepared by **GP-B**. White solid, 49.5 mg, 73% yield. m.p. = 81-82 °C; <sup>1</sup>H NMR (400 MHz, CDCl<sub>3</sub>) δ 7.86 – 7.78 (m, 3H), 7.75 (d, *J* = 1.3 Hz, 1H), 7.52 – 7.41 (m, 3H), 3.76 (t, *J* = 7.8 Hz, 1H), 2.03 (ddd, *J* = 13.7, 8.2, 7.2 Hz, 1H), 1.85 – 1.57 (m, 6H), 1.40 (s, 9H), 1.25 – 1.10 (m, 4H), 1.02 – 0.89 (m, 2H); <sup>13</sup>C NMR (101 MHz, CDCl<sub>3</sub>) δ 173.6, 137.6, 133.4, 132.5, 128.0, 127.8, 127.6, 126.6, 126.1, 125.9, 125.5, 80.5, 50.0, 41.1, 35.4, 33.3, 33.1, 28.0, 26.5, 26.2, 26.1. IR (film): ν (cm<sup>-1</sup>) 2960, 2924, 2848, 1719, 1632, 1600, 1507, 1477, 1446, 1392, 1365, 1339, 1310, 1273, 1249, 1219, 1172, 1146, 1139, 1092, 978, 952, 896, 859, 839, 757, 746, 652, 517, 476; HR-MS (ESI) *m/z* calcd for C<sub>23</sub>H<sub>30</sub>NaO<sub>2</sub><sup>+</sup> [*M*+Na<sup>+</sup>] 361.21380, found 361.21384; [α]<sub>D</sub><sup>24.0</sup> = -26.5 (c = 0.1, CHCl<sub>3</sub>); HPLC conditions: IB column, hexane/2-propanol = 99.8/0.2, flow rate = 0.5 mL/min, λ = 240 nm, t<sub>R</sub> = 17.9 min (major), t<sub>R</sub> = 20.4 min (minor), 97:3 er.

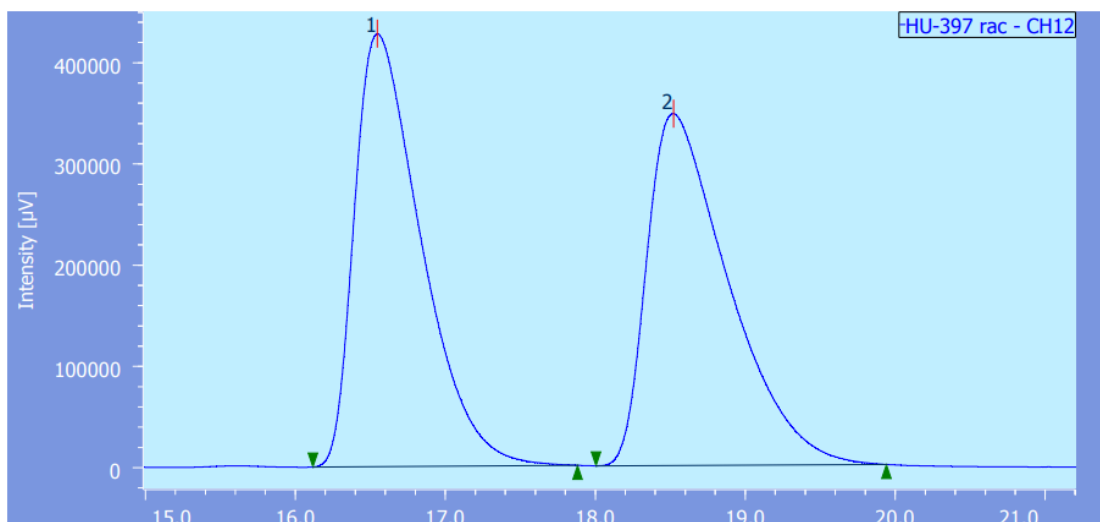

Decision

| # | Peak Name | CH | tR [min] | Area [µV·sec] | Height [µV] | Area%  | Height% | Quantity | NTP  | Resolution | Symmetry Factor | Warning |
|---|-----------|----|----------|---------------|-------------|--------|---------|----------|------|------------|-----------------|---------|
| 1 | Unknown   | 12 | 16.547   | 13205011      | 427298      | 50.113 | 55.159  | N/A      | 6725 | 2.206      | 1.720           |         |
| 2 | Unknown   | 12 | 18.520   | 13145306      | 347370      | 49.887 | 44.841  | N/A      | 5640 | N/A        | 1.840           |         |

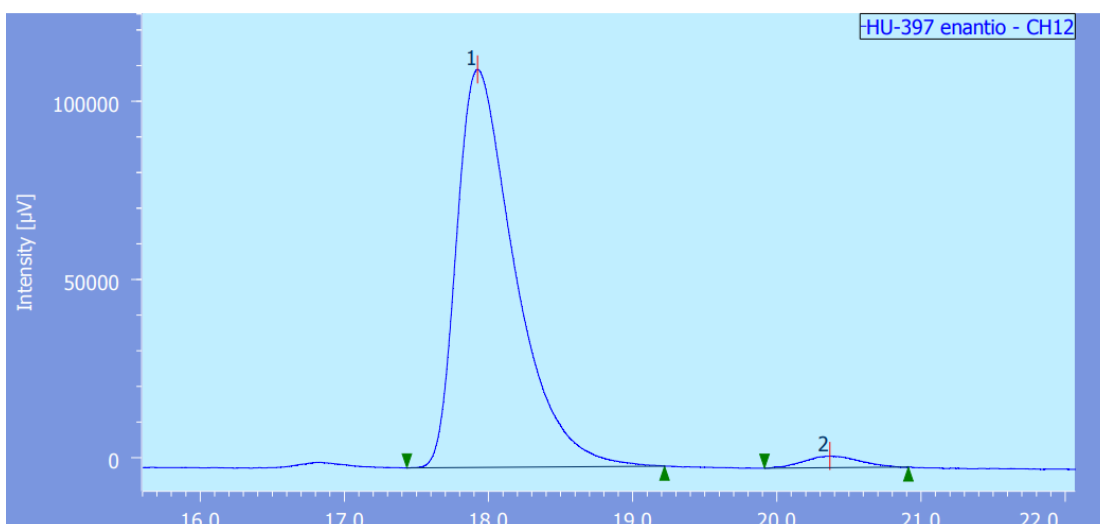

Decision

| # | Peak Name | CH | tR [min] | Area [µV·sec] | Height [µV] | Area%  | Height% | Quantity | NTP   | Resolution | Symmetry Factor | Warning |
|---|-----------|----|----------|---------------|-------------|--------|---------|----------|-------|------------|-----------------|---------|
| 1 | Unknown   | 12 | 17.923   | 3133501       | 111555      | 97.277 | 97.160  | N/A      | 10160 | 3.399      | 1.714           |         |
| 2 | Unknown   | 12 | 20.367   | 87724         | 3260        | 2.723  | 2.840   | N/A      | 12453 | N/A        | 1.065           |         |

### *tert*-Butyl (*R*)-3-cyclohexyl-2-(9H-fluoren-3-yl)propanoate (25)

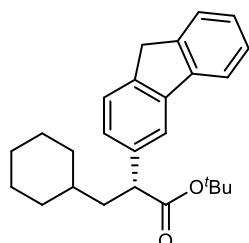

Prepared by **GP-B**. White solid, 53.4 mg, 71% yield. m.p. = 61-62 °C; <sup>1</sup>H NMR (400 MHz, CDCl<sub>3</sub>) δ 7.79 – 7.70 (m, 2H), 7.57 – 7.48 (m, 2H), 7.40 – 7.27 (m, 3H), 3.90 (s, 2H), 3.67 (dd, *J* = 8.2, 7.4 Hz, 1H), 2.00 (ddd, *J* = 13.7, 8.4, 7.0 Hz, 1H), 1.84 – 1.59 (m, 6H), 1.42 (s, 9H), 1.28 – 1.12 (m, 4H), 1.01 – 0.87 (m, 2H); <sup>13</sup>C NMR (101 MHz, CDCl<sub>3</sub>) δ 173.8, 143.5, 143.3, 141.5, 140.5, 138.8, 126.7, 126.6, 126.5, 125.0, 124.4, 119.7 (two peaks), 80.4, 50.0, 41.3, 36.8, 35.5, 33.3, 33.1, 28.0, 26.5, 26.17, 26.15.

IR (film):  $\nu$  (cm<sup>-1</sup>) 2981, 2920, 2899, 2844, 1724, 1468, 1447, 1431, 1390, 1364, 1356, 1323, 1268, 1256, 1243, 1218, 1174, 1147, 1135, 1096, 1090, 1002, 972, 881, 860, 844, 833, 761, 735, 589, 422; HR-MS (ESI) *m/z* calcd for C<sub>26</sub>H<sub>32</sub>NaO<sub>2</sub><sup>+</sup> [M+Na<sup>+</sup>] 399.22945, found 399.22951; [α]<sub>D</sub><sup>24.0</sup> = -24.6 (*c* = 0.1, CHCl<sub>3</sub>); HPLC conditions: Chiral-NR column, hexane/2-propanol = 99/1, flow rate = 1.0

mL/min,  $\lambda = 210$  nm,  $t_R = 32.3$  min (minor),  $t_R = 39.5$  min (major), 96:4 er.

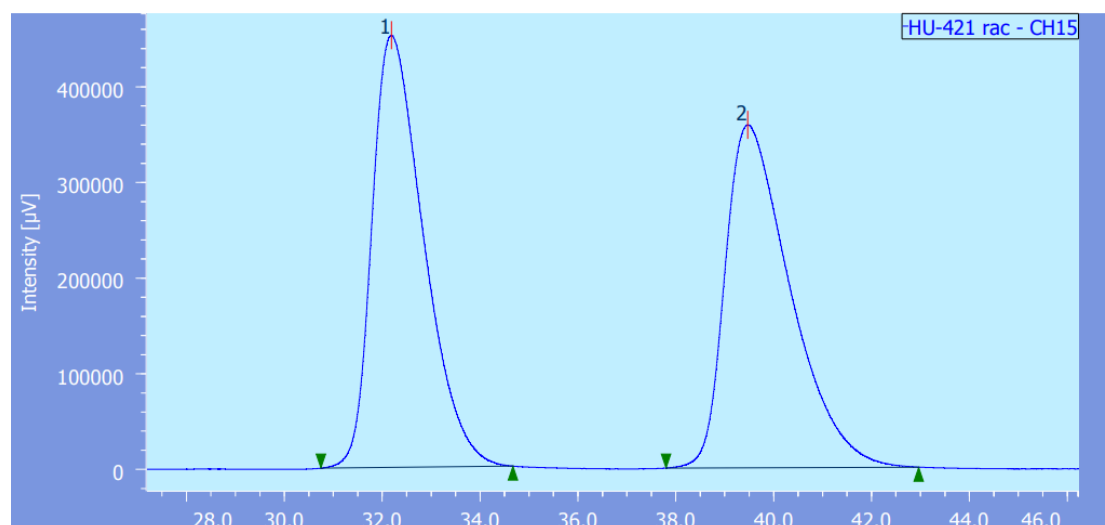

Decision

| # | Peak Name | CH | tR [min] | Area [µV-sec] | Height [µV] | Area%  | Height% | Quantity | NTP  | Resolution | Symmetry Factor | Warning |
|---|-----------|----|----------|---------------|-------------|--------|---------|----------|------|------------|-----------------|---------|
| 1 | Unknown   | 15 | 32.187   | 33094713      | 451547      | 49.950 | 55.764  | N/A      | 4504 | 3.378      | 1.483           |         |
| 2 | Unknown   | 15 | 39.463   | 33160925      | 358199      | 50.050 | 44.236  | N/A      | 4321 | N/A        | 1.661           |         |

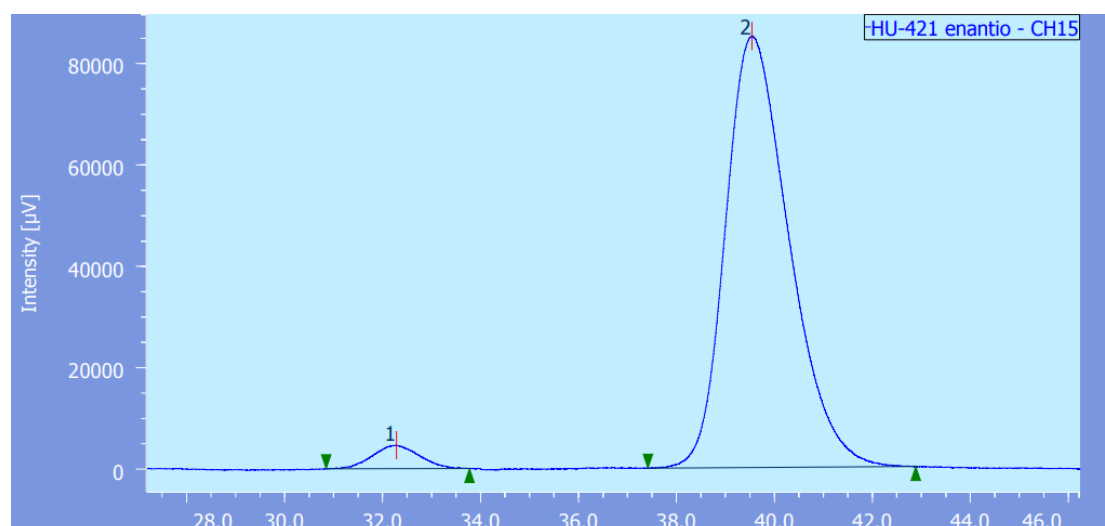

Decision

| # | Peak Name | CH | tR [min] | Area [µV-sec] | Height [µV] | Area%  | Height% | Quantity | NTP  | Resolution | Symmetry Factor | Warning |
|---|-----------|----|----------|---------------|-------------|--------|---------|----------|------|------------|-----------------|---------|
| 1 | Unknown   | 15 | 32.283   | 306750        | 4623        | 3.846  | 5.156   | N/A      | 5175 | 3.505      | 1.022           |         |
| 2 | Unknown   | 15 | 39.540   | 7669135       | 85043       | 96.154 | 94.844  | N/A      | 4506 | N/A        | 1.311           |         |

### *tert*-Butyl (*R*)-3-cyclohexyl-2-(phenanthren-3-yl)propanoate (**26**)

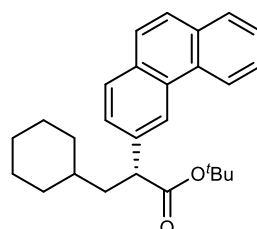

Prepared by **GP-B**. White solid, 51.3 mg, 66% yield. m.p. = 96-97 °C;  $^1\text{H}$  NMR (400 MHz,  $\text{CDCl}_3$ )  $\delta$  8.73 (d,  $J = 8.2$  Hz, 1H), 8.62 (d,  $J = 1.3$  Hz, 1H), 7.93 – 7.88 (m, 1H), 7.86 (d,  $J = 8.2$  Hz, 1H), 7.76 – 7.64 (m, 3H), 7.64 – 7.56 (m, 2H), 3.88 (t,  $J = 7.8$  Hz, 1H), 2.11 (ddd,  $J = 13.8, 8.3, 7.1$  Hz, 1H), 1.89 – 1.58 (m, 6H), 1.42 (s, 9H), 1.32 – 1.12 (m, 4H), 1.06 – 0.92 (m, 2H);  $^{13}\text{C}$  NMR (101 MHz,  $\text{CDCl}_3$ )  $\delta$  173.6, 138.5, 132.1, 131.0, 130.3, 130.2, 128.7, 128.5, 126.6, 126.6, 126.52, 126.47, 122.7, 121.8, 80.6, 50.5, 41.5, 35.5, 33.3, 33.2, 28.0, 26.5, 26.2, 26.1. IR (film):  $\nu$  ( $\text{cm}^{-1}$ ) 2971, 2923, 2846, 1724, 1602, 1508, 1448, 1431, 1392, 1366, 1338, 1310, 1272, 1256, 1244, 1224, 1142, 1127, 1090, 1039, 972, 874, 848, 839, 807, 753, 632, 620, 554, 513, 430; HR-MS (ESI)  $m/z$  calcd for  $\text{C}_{27}\text{H}_{32}\text{NaO}_2^+$

[M+Na<sup>+</sup>] 411.22945, found 411.22958; [ $\alpha$ ]<sub>D</sub><sup>24.0</sup> = -37.6 (c = 0.1, CHCl<sub>3</sub>); HPLC conditions: Chiral-NR column, hexane/2-propanol = 99/1, flow rate = 1.0 mL/min,  $\lambda$  = 254 nm, t<sub>R</sub> = 50.8 min (major), t<sub>R</sub> = 58.8 min (minor), 96:4 er.

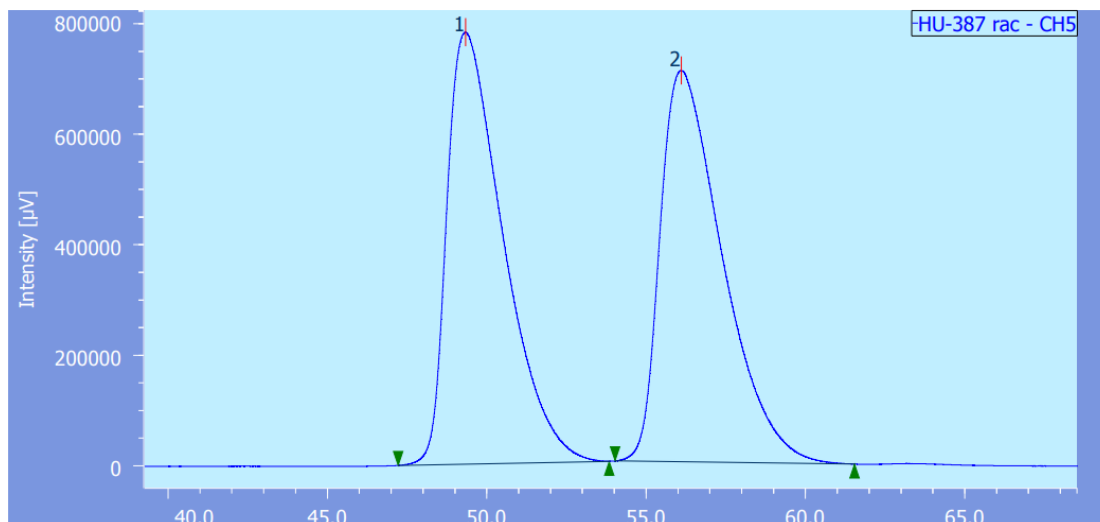

Decision

| # | Peak Name | CH | tR [min] | Area [μV·sec] | Height [μV] | Area%  | Height% | Quantity | NTP  | Resolution | Symmetry Factor | Warning |
|---|-----------|----|----------|---------------|-------------|--------|---------|----------|------|------------|-----------------|---------|
| 1 | Unknown   | 5  | 49.330   | 95645024      | 781087      | 49.835 | 52.451  | N/A      | 3798 | 2.011      | 1.800           |         |
| 2 | Unknown   | 5  | 56.100   | 96277413      | 708075      | 50.165 | 47.549  | N/A      | 3997 | N/A        | 1.732           |         |

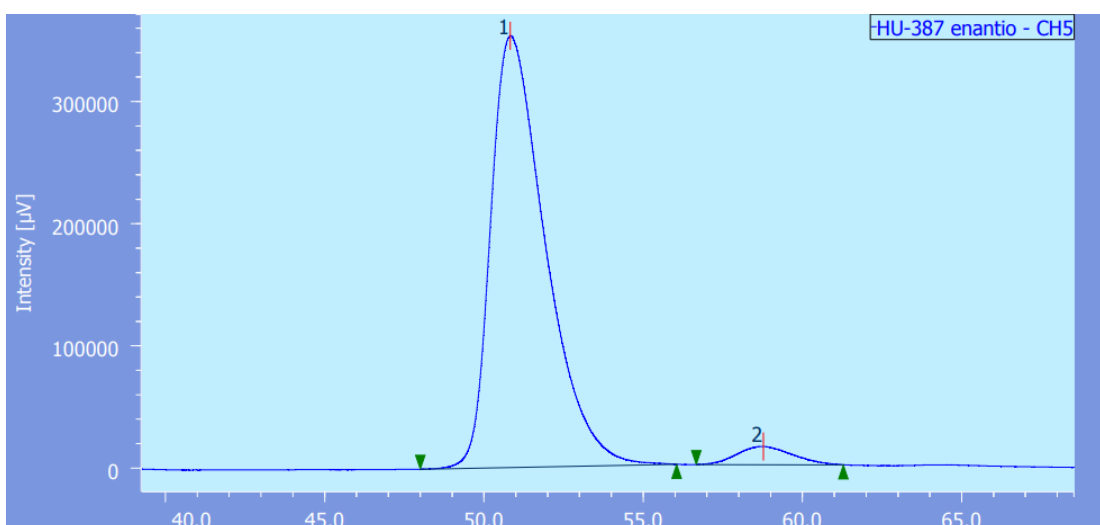

Decision

| # | Peak Name | CH | tR [min] | Area [μV·sec] | Height [μV] | Area%  | Height% | Quantity | NTP  | Resolution | Symmetry Factor | Warning |
|---|-----------|----|----------|---------------|-------------|--------|---------|----------|------|------------|-----------------|---------|
| 1 | Unknown   | 5  | 50.823   | 42186669      | 353059      | 95.901 | 95.953  | N/A      | 4371 | 2.509      | 1.602           |         |
| 2 | Unknown   | 5  | 58.767   | 1803114       | 14889       | 4.099  | 4.047   | N/A      | 5158 | N/A        | 1.127           |         |

### *tert*-Butyl (*R*)-3-cyclohexyl-2-(2-fluoro-[1,1'-biphenyl]-4-yl)propanoate (27)

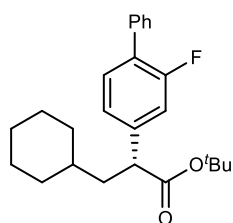

Prepared by **GP-B**. White solid, 55.1 mg, 72% yield. m.p. = 79-80 °C; <sup>1</sup>H NMR (400 MHz, CDCl<sub>3</sub>) δ 7.59 – 7.53 (m, 2H), 7.48 – 7.32 (m, 4H), 7.18 – 7.10 (m, 2H), 3.62 (t, *J* = 8.0 Hz, 1H), 1.96 (ddd, *J* = 13.7, 8.5, 6.9 Hz, 1H), 1.82 – 1.57 (m, 6H), 1.44 (s, 9H), 1.28 – 1.14 (m, 4H), 1.02 – 0.88 (m, 2H); <sup>13</sup>C NMR (101 MHz, CDCl<sub>3</sub>) δ 173.0, 159.6 (d, *J* = 248.8 Hz), 141.5 (d, *J* = 7.7 Hz), 135.6 (d, *J* = 1.2 Hz), 130.5 (d, *J* = 3.9 Hz), 128.9 (d, *J* = 2.9 Hz), 128.4, 127.5, 127.4 (d, *J* = 13.5 Hz), 123.9 (d, *J* = 3.2 Hz), 115.5 (d, *J* = 23.6 Hz), 80.8, 49.4, 41.2, 35.4, 33.2, 33.1, 28.0, 26.5, 26.15, 26.12; <sup>19</sup>F NMR (377 MHz, CDCl<sub>3</sub>) δ -118.01. IR (film): ν (cm<sup>-1</sup>

1) 2972, 2922, 2851, 1717, 1624, 1580, 1562, 1514, 1485, 1447, 1423, 1390, 1365, 1354, 1271, 1254, 1208, 1155, 1138, 1075, 1010, 964, 869, 836, 821, 760, 727, 691, 636, 599, 574, 518, 463; HR-MS (ESI) m/z calcd for  $C_{25}H_{31}FNaO_2^+$  [M+Na<sup>+</sup>] 405.22003, found 405.22002;  $[\alpha]_D^{23.8} = -18.1$  (c = 0.1, CHCl<sub>3</sub>); HPLC conditions: Chiral-NR column, hexane/2-propanol = 99/1, flow rate = 1.0 mL/min,  $\lambda = 254$  nm,  $t_R = 7.4$  min (minor),  $t_R = 8.5$  min (major), 97:3 er.

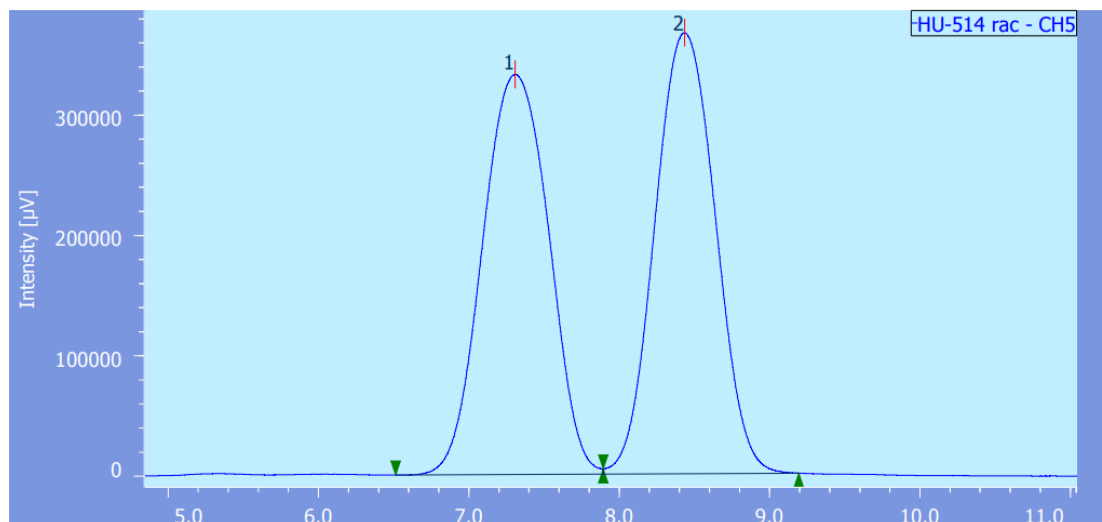

Decision

| # | Peak Name | CH | tR [min] | Area [μV·sec] | Height [μV] | Area%  | Height% | Quantity | NTP  | Resolution | Symmetry Factor | Warning |
|---|-----------|----|----------|---------------|-------------|--------|---------|----------|------|------------|-----------------|---------|
| 1 | Unknown   | 5  | 7.307    | 10183732      | 332283      | 49.838 | 47.574  | N/A      | 1194 | 1.407      | 1.012           |         |
| 2 | Unknown   | 5  | 8.433    | 10249776      | 366166      | 50.162 | 52.426  | N/A      | 1972 | N/A        | 1.044           |         |

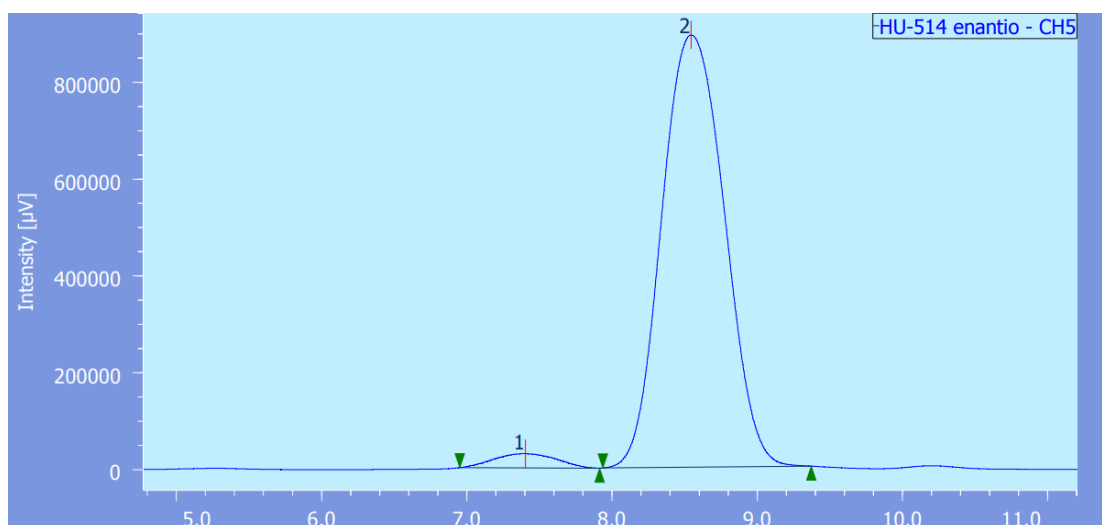

Decision

| # | Peak Name | CH | tR [min] | Area [μV·sec] | Height [μV] | Area%  | Height% | Quantity | NTP  | Resolution | Symmetry Factor | Warning |
|---|-----------|----|----------|---------------|-------------|--------|---------|----------|------|------------|-----------------|---------|
| 1 | Unknown   | 5  | 7.403    | 884533        | 29254       | 3.201  | 3.175   | N/A      | 1178 | 1.356      | 1.008           |         |
| 2 | Unknown   | 5  | 8.543    | 26750393      | 892090      | 96.799 | 96.825  | N/A      | 1727 | N/A        | 1.088           |         |



***tert*-Butyl (*R*)-3-cyclohexyl-2-(6-methoxynaphthalen-2-yl)propanoate (28)**

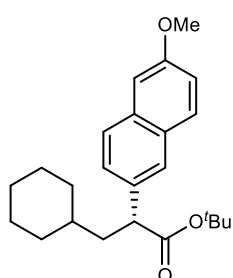

Prepared by **GP-B**. White solid, 40.5 mg, 55% yield. m.p. = 76-77 °C; <sup>1</sup>H NMR (400 MHz, CDCl<sub>3</sub>) δ 7.74 – 7.63 (m, 3H), 7.43 (dd, *J* = 8.5, 1.7 Hz, 1H), 7.17 – 7.09 (m, 2H), 3.91 (s, 3H), 3.71 (t, *J* = 7.8 Hz, 1H), 2.00 (ddd, *J* = 13.8, 8.1, 7.3 Hz, 1H), 1.83 – 1.59 (m, 6H), 1.39 (s, 9H), 1.25 – 1.09 (m, 4H), 1.00 – 0.88 (m, 2H); <sup>13</sup>C NMR (101 MHz, CDCl<sub>3</sub>) δ 173.7, 157.5, 135.3, 133.6, 129.3, 128.9, 126.8, 126.6, 126.4, 118.7, 105.5, 80.4, 55.3, 49.8, 41.1, 35.4, 33.3, 33.1, 28.0, 26.5, 26.2, 26.1. IR (film): ν (cm<sup>-1</sup>) 3001, 2981, 2917, 2848, 1724, 1630, 1604, 1506, 1483, 1473, 1445, 1393, 1364, 1356, 1349,

1314, 1262, 1223, 1207, 1142, 1123, 1032, 895, 849, 819, 763, 715, 660, 620, 513, 474, 413; HR-MS (ESI) *m/z* calcd for C<sub>24</sub>H<sub>32</sub>NaO<sub>3</sub><sup>+</sup> [M+Na<sup>+</sup>] 391.22437, found 391.22446; [α]<sub>D</sub><sup>24.0</sup> = -34.3 (*c* = 0.1, CHCl<sub>3</sub>); HPLC conditions (er was determined by reducing the product to the corresponding alcohol with LiAlH<sub>4</sub>): AD-H column, hexane/2-propanol = 90/10, flow rate = 1.0 mL/min, λ = 254 nm, t<sub>R</sub> = 10.0 min (major), t<sub>R</sub> = 12.6 min (minor), 97:3 er.

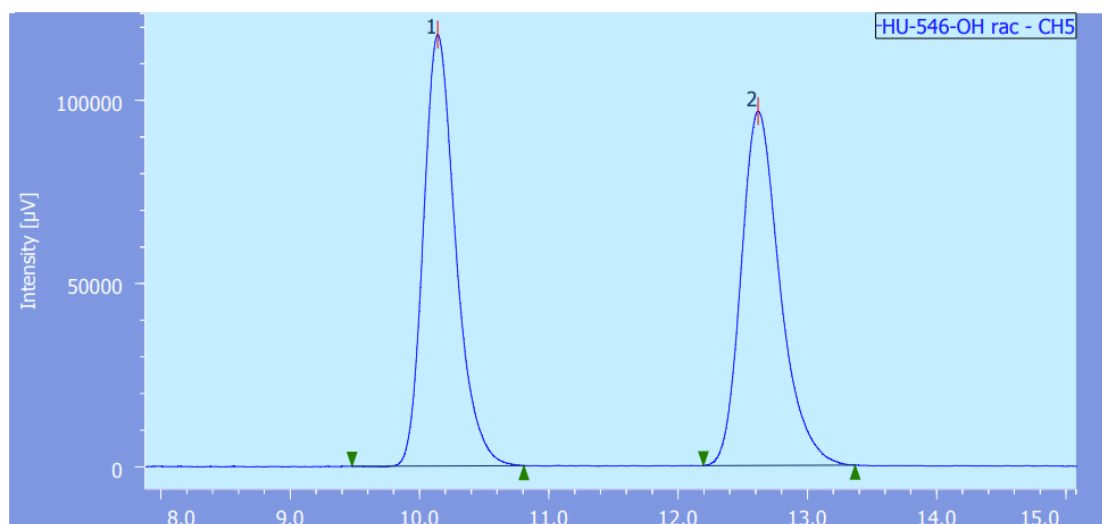

**Decision**

| # | Peak Name | CH | tR [min] | Area [μV·sec] | Height [μV] | Area%  | Height% | Quantity | NTP  | Resolution | Symmetry Factor | Warning |
|---|-----------|----|----------|---------------|-------------|--------|---------|----------|------|------------|-----------------|---------|
| 1 | Unknown   | 5  | 10.140   | 2042259       | 117680      | 50.247 | 54.906  | N/A      | 8326 | 5.083      | 1.284           |         |
| 2 | Unknown   | 5  | 12.617   | 2022141       | 96648       | 49.753 | 45.094  | N/A      | 8978 | N/A        | 1.308           |         |

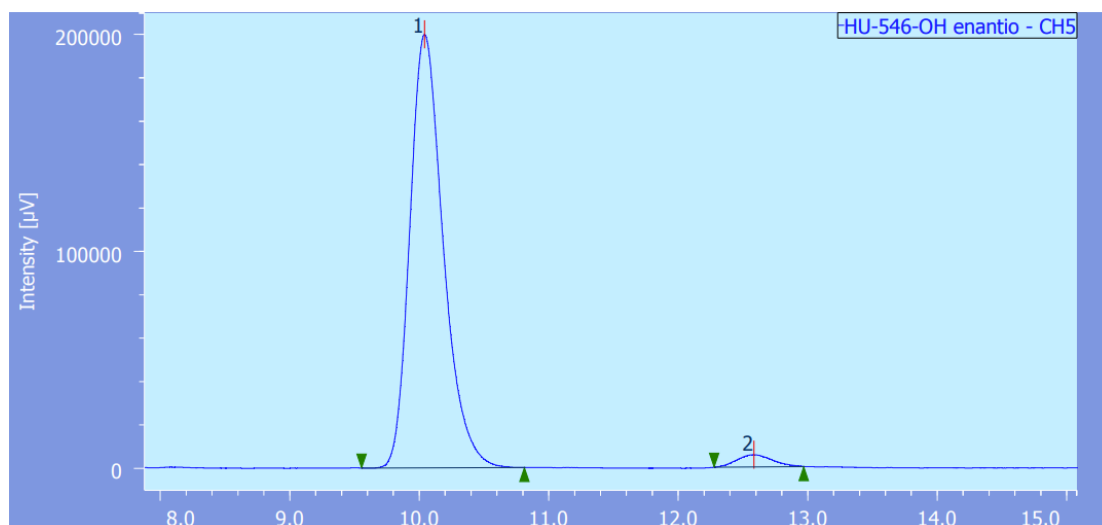

## Decision

| # | Peak Name | CH | tR [min] | Area [ $\mu$ V-sec] | Height [ $\mu$ V] | Area%  | Height% | Quantity | NTP  | Resolution | Symmetry Factor | Warning |
|---|-----------|----|----------|---------------------|-------------------|--------|---------|----------|------|------------|-----------------|---------|
| 1 | Unknown   | 5  | 10.040   | 3575465             | 199622            | 97.069 | 97.256  | N/A      | 7613 | 5.224      | 1.291           |         |
| 2 | Unknown   | 5  | 12.583   | 107945              | 5632              | 2.931  | 2.744   | N/A      | 9512 | N/A        | 1.136           |         |

Methyl (*R*)-4-(1-(*tert*-butoxy)-3-cyclohexyl-1-oxopropan-2-yl)thiophene-2-carboxylate (**29**)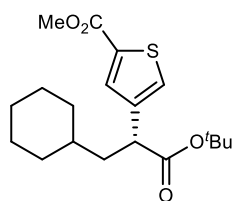

Prepared by **GP-B**. Colorless oil, 45.8 mg, 65% yield.  $^1\text{H}$  NMR (400 MHz,  $\text{CDCl}_3$ )  $\delta$  7.74 (d,  $J = 1.5$  Hz, 1H), 7.33 (dd,  $J = 0.4, 1.6$  Hz, 1H), 3.86 (s, 3H), 3.66 (t,  $J = 8.0$  Hz, 1H), 1.87 (ddd,  $J = 13.6, 8.4, 6.9$  Hz, 1H), 1.77 – 1.54 (m, 6H), 1.40 (s, 9H), 1.21 – 1.07 (m, 4H), 0.97 – 0.82 (m, 2H);  $^{13}\text{C}$  NMR (101 MHz,  $\text{CDCl}_3$ )  $\delta$  172.6, 162.6, 141.2, 133.5, 133.3, 128.5, 80.9, 52.1, 45.4, 41.1, 35.3, 33.0, 27.9, 26.4, 26.11, 26.09. IR (film):  $\nu$  ( $\text{cm}^{-1}$ ) 2977, 2923, 2849, 1716, 1542, 1442, 1367, 1286, 1251, 1142, 1073, 965, 844, 785, 770, 750, 446, 435; HR-MS (ESI)  $m/z$  calcd for  $\text{C}_{19}\text{H}_{28}\text{NaO}_4\text{S}^+$  [ $\text{M}+\text{Na}^+$ ] 375.16005, found 375.16041;  $[\alpha]_{\text{D}}^{24.1} = -8.4$  ( $c = 0.1$ ,  $\text{CHCl}_3$ ); HPLC conditions: IC column, hexane/2-propanol = 95/5, flow rate = 1.0 mL/min,  $\lambda = 254$  nm,  $t_{\text{R}} = 6.0$  min (minor),  $t_{\text{R}} = 6.5$  min (major), 93:7 er.

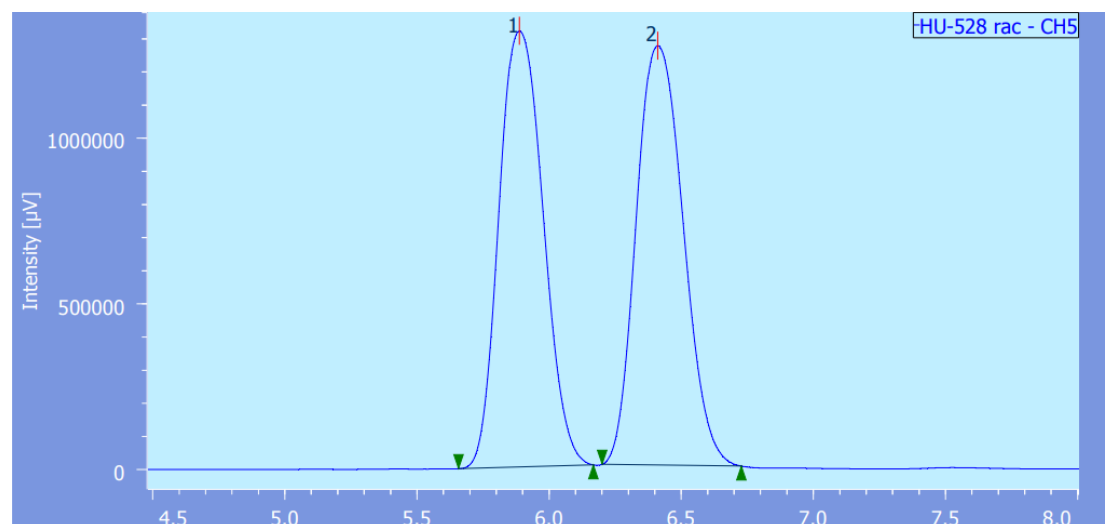

## Decision

| # | Peak Name | CH | tR [min] | Area [ $\mu$ V-sec] | Height [ $\mu$ V] | Area%  | Height% | Quantity | NTP  | Resolution | Symmetry Factor | Warning |
|---|-----------|----|----------|---------------------|-------------------|--------|---------|----------|------|------------|-----------------|---------|
| 1 | Unknown   | 5  | 5.887    | 15334715            | 1315386           | 49.445 | 50.973  | N/A      | 5550 | 1.611      | 1.147           |         |
| 2 | Unknown   | 5  | 6.410    | 15678665            | 1265193           | 50.555 | 49.027  | N/A      | 5842 | N/A        | 1.170           |         |

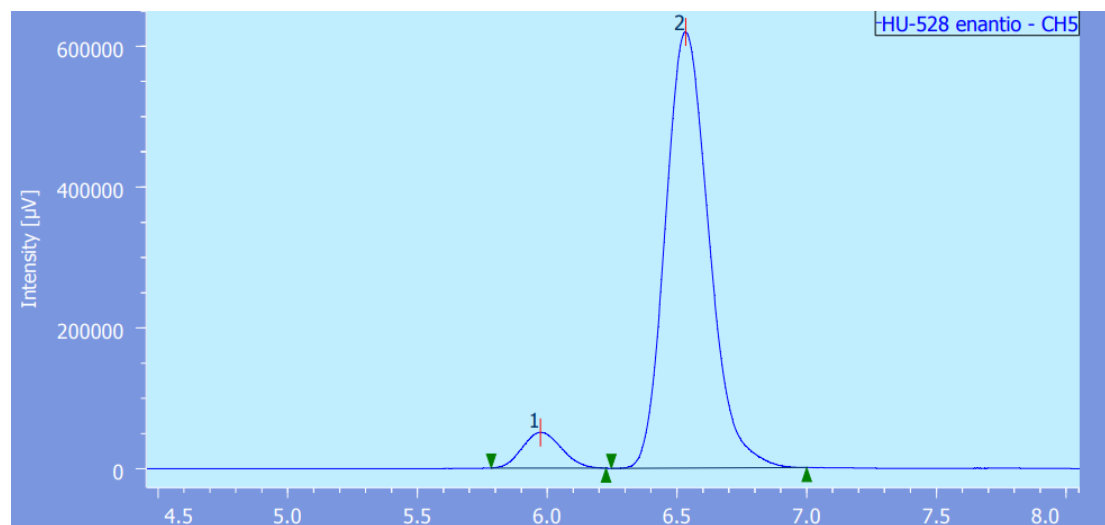

## Decision

| # | Peak Name | CH | tR [min] | Area [ $\mu$ V-sec] | Height [ $\mu$ V] | Area%  | Height% | Quantity | NTP  | Resolution | Symmetry Factor | Warning |
|---|-----------|----|----------|---------------------|-------------------|--------|---------|----------|------|------------|-----------------|---------|
| 1 | Unknown   | 5  | 5.973    | 533037              | 50659             | 6.863  | 7.565   | N/A      | 7107 | 1.907      | 1.124           |         |
| 2 | Unknown   | 5  | 6.533    | 7234146             | 618960            | 93.137 | 92.435  | N/A      | 7322 | N/A        | 1.198           |         |

***tert*-Butyl (*R*)-2-(benzo[*b*]thiophen-5-yl)-3-cyclohexylpropanoate (30)**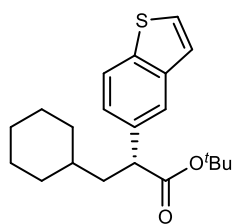

Prepared by **GP-B**. White solid, 44.8 mg, 65% yield. m.p. = 119-120 °C;  $^1\text{H}$  NMR (400 MHz,  $\text{CDCl}_3$ )  $\delta$  7.81 (d,  $J$  = 8.4 Hz, 1H), 7.76 (d,  $J$  = 1.6 Hz, 1H), 7.42 (d,  $J$  = 5.4 Hz, 1H), 7.35 – 7.28 (m, 2H), 3.70 (t,  $J$  = 7.8 Hz, 1H), 1.99 (ddd,  $J$  = 13.7, 8.2, 7.1 Hz, 1H), 1.83 – 1.57 (m, 6H), 1.40 (s, 9H), 1.24 – 1.09 (m, 4H), 1.01 – 0.85 (m, 2H);  $^{13}\text{C}$  NMR (101 MHz,  $\text{CDCl}_3$ )  $\delta$  173.7, 139.8, 138.3, 136.3, 126.5, 124.5, 123.9, 122.7, 122.3, 80.4, 49.7, 41.4, 35.4,

33.3, 33.1, 28.0, 26.5, 26.2, 26.1. IR (film):  $\nu$  ( $\text{cm}^{-1}$ ) 3101, 2963, 2926, 2848, 1716, 1601, 1446, 1421, 1392, 1365, 1348, 1309, 1274, 1257, 1226, 1212, 1151, 1138, 1124, 1090, 1052, 976, 894, 837, 825, 813, 760, 714, 703, 616, 484; HR-MS (ESI)  $m/z$  calcd for  $\text{C}_{21}\text{H}_{28}\text{NaO}_2\text{S}^+$  [ $\text{M}+\text{Na}^+$ ] 367.17022, found 367.17078;  $[\alpha]_{\text{D}}^{24.1} = -21.4$  ( $c = 0.1$ ,  $\text{CHCl}_3$ ); HPLC conditions: Chiral-NR column, hexane/2-propanol = 99/1, flow rate = 1.0 mL/min,  $\lambda = 230$  nm,  $t_{\text{R}} = 27.4$  min (minor),  $t_{\text{R}} = 32.6$  min (major), 96:4 er.

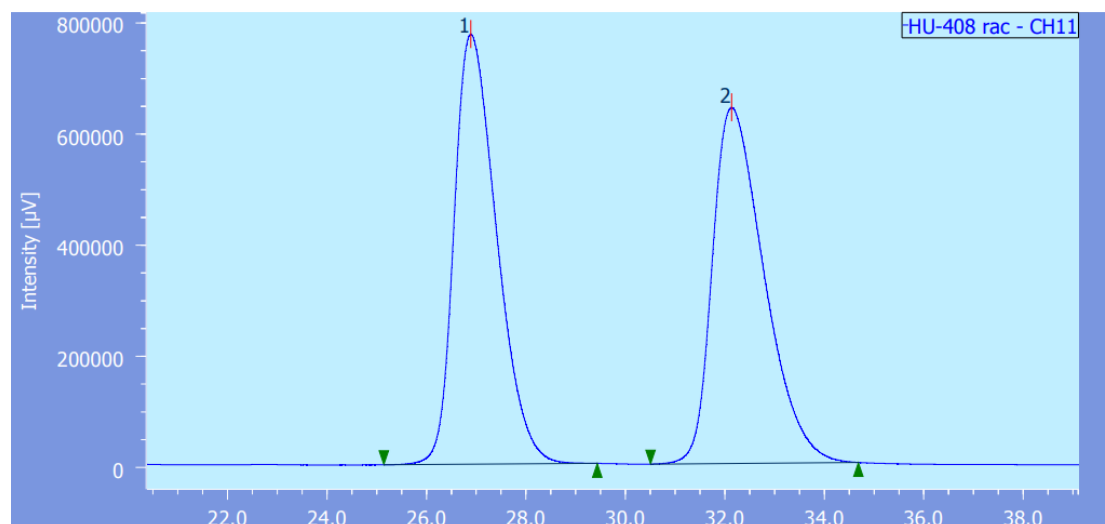

## Decision

| # | Peak Name | CH | tR [min] | Area [ $\mu$ V-sec] | Height [ $\mu$ V] | Area%  | Height% | Quantity | NTP  | Resolution | Symmetry Factor | Warning |
|---|-----------|----|----------|---------------------|-------------------|--------|---------|----------|------|------------|-----------------|---------|
| 1 | Unknown   | 11 | 26.887   | 46010827            | 773829            | 49.858 | 54.706  | N/A      | 4754 | 3.048      | 1.389           |         |
| 2 | Unknown   | 11 | 32.133   | 46273129            | 640707            | 50.142 | 45.294  | N/A      | 4614 | N/A        | 1.497           |         |

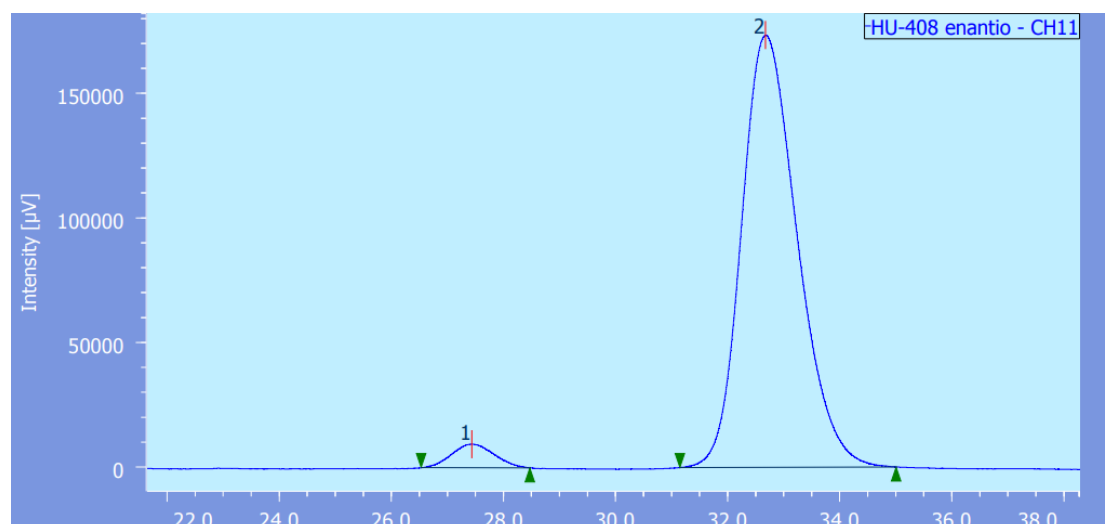

## Decision

| # | Peak Name | CH | tR [min] | Area [ $\mu\text{V}\cdot\text{sec}$ ] | Height [ $\mu\text{V}$ ] | Area%  | Height% | Quantity | NTP  | Resolution | Symmetry Factor | Warning |
|---|-----------|----|----------|---------------------------------------|--------------------------|--------|---------|----------|------|------------|-----------------|---------|
| 1 | Unknown   | 11 | 27.437   | 502218                                | 9489                     | 4.027  | 5.190   | N/A      | 5857 | 3.243      | 1.071           |         |
| 2 | Unknown   | 11 | 32.673   | 11968824                              | 173348                   | 95.973 | 94.810  | N/A      | 5245 | N/A        | 1.240           |         |

***tert*-Butyl (*R*)-2-(benzofuran-5-yl)-3-cyclohexylpropanoate (31)**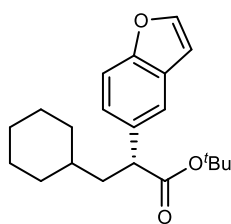

Prepared by **GP-B** (two 40 W 390 nm Kessile lamps were used). White solid, 33.6 mg, 51% yield. m.p. = 89-90 °C;  $^1\text{H}$  NMR (400 MHz,  $\text{CDCl}_3$ )  $\delta$  7.60 (d,  $J = 2.2$  Hz, 1H), 7.53 (d,  $J = 1.7$  Hz, 1H), 7.43 (d,  $J = 8.5$  Hz, 1H), 7.25 (dd,  $J = 8.6, 1.8$  Hz, 1H), 6.74 (dd,  $J = 2.2, 0.9$  Hz, 1H), 3.80 – 3.49 (m, 1H), 1.97 (ddd,  $J = 13.7, 8.3, 7.1$  Hz, 1H), 1.80 – 1.61 (m, 6H), 1.39 (s, 9H), 1.23 – 1.11 (m, 4H), 0.98 – 0.86 (m, 2H);  $^{13}\text{C}$  NMR (101 MHz,  $\text{CDCl}_3$ )  $\delta$  173.9, 154.1, 145.1, 134.7, 127.5, 124.3, 120.2, 111.1, 106.6, 80.3, 49.7, 41.6, 35.4, 33.3, 33.1, 28.0, 26.5, 26.2, 26.1. IR (film):  $\nu$  ( $\text{cm}^{-1}$ ) 2981, 2920, 2847, 1721, 1592, 1538, 1466, 1447, 1362, 1345, 1312, 1272, 1257, 1247, 1213, 1190, 1148, 1131, 1109, 1090, 1027, 976, 896, 842, 822, 770, 760, 742, 728, 696, 644, 610, 501, 455, 433; HR-MS (ESI)  $m/z$  calcd for  $\text{C}_{21}\text{H}_{28}\text{NaO}_3^+$  [ $\text{M}+\text{Na}^+$ ] 351.19307, found 351.19325;  $[\alpha]_{\text{D}}^{22.5} = -35.7$  ( $c = 0.1$ ,  $\text{CHCl}_3$ ); HPLC conditions: NR column, hexane/2-propanol = 99/1, flow rate = 1.0 mL/min,  $\lambda = 240$  nm,  $t_{\text{R}} = 17.4$  min (minor),  $t_{\text{R}} = 19.7$  min (major), 95:5 er.

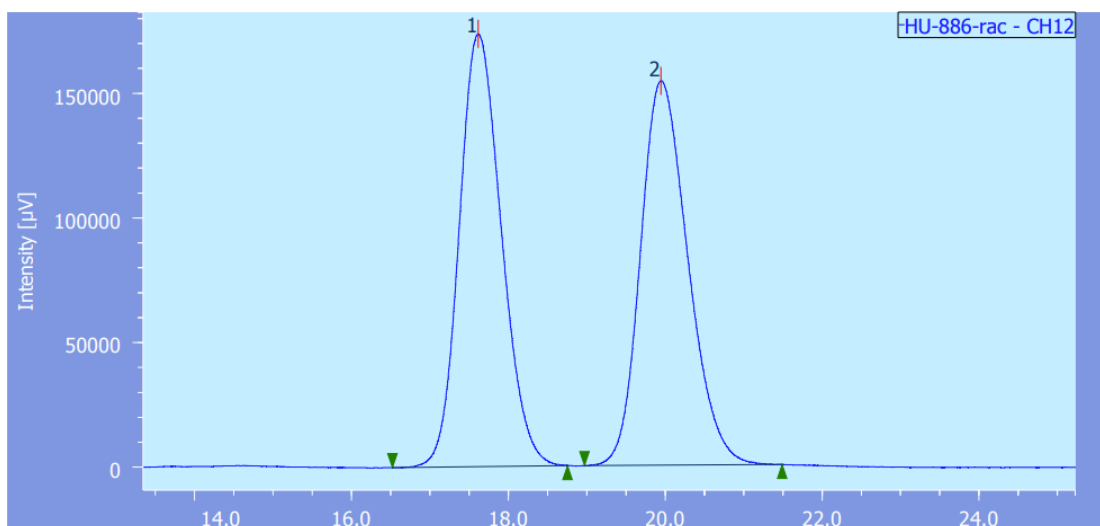

## Decision

| # | Peak Name | CH | tR [min] | Area [ $\mu\text{V}\cdot\text{sec}$ ] | Height [ $\mu\text{V}$ ] | Area%  | Height% | Quantity | NTP  | Resolution | Symmetry Factor | Warning |
|---|-----------|----|----------|---------------------------------------|--------------------------|--------|---------|----------|------|------------|-----------------|---------|
| 1 | Unknown   | 12 | 17.617   | 6473882                               | 173531                   | 49.986 | 52.952  | N/A      | 5144 | 2.239      | 1.159           |         |
| 2 | Unknown   | 12 | 19.943   | 6477528                               | 154180                   | 50.014 | 47.048  | N/A      | 5247 | N/A        | 1.229           |         |

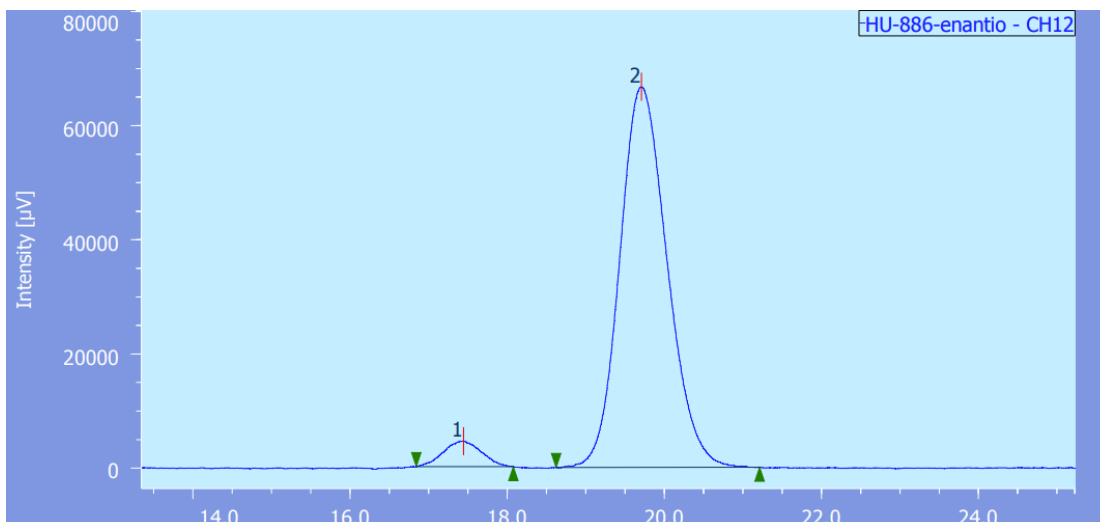

Decision

| # | Peak Name | CH | tR [min] | Area [µV·sec] | Height [µV] | Area%  | Height% | Quantity | NTP  | Resolution | Symmetry Factor | Warning |
|---|-----------|----|----------|---------------|-------------|--------|---------|----------|------|------------|-----------------|---------|
| 1 | Unknown   | 12 | 17.443   | 151709        | 4481        | 5.151  | 6.300   | N/A      | 5532 | 2.229      | 0.996           |         |
| 2 | Unknown   | 12 | 19.707   | 2793717       | 66655       | 94.849 | 93.700  | N/A      | 5153 | N/A        | 1.151           |         |

***tert*-Butyl (*R*)-3-cyclohexyl-2-(dibenzo[*b,d*]thiophen-2-yl)propanoate (32)**

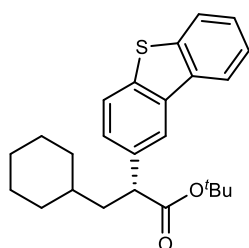

Prepared by **GP-B**. White solid, 52.5 mg, 65% yield. m.p. = 63–64 °C; <sup>1</sup>H NMR (400 MHz, CDCl<sub>3</sub>) δ 8.22 – 8.15 (m, 1H), 8.10 (d, *J* = 1.5 Hz, 1H), 7.88 – 7.82 (m, 1H), 7.79 (d, *J* = 8.3 Hz, 1H), 7.49 – 7.41 (m, 3H), 3.77 (t, *J* = 7.8 Hz, 1H), 2.10 – 1.99 (m, 1H), 1.85 – 1.58 (m, 6H), 1.41 (s, 9H), 1.30 – 1.10 (m, 4H), 1.05 – 0.89 (m, 2H); <sup>13</sup>C NMR (101 MHz, CDCl<sub>3</sub>) δ 173.6, 139.8, 137.9, 136.6, 135.7, 135.4, 126.8, 126.6, 124.3, 122.8, 122.7, 121.6, 120.8, 80.6, 49.9, 41.5, 35.4, 33.3, 33.1, 28.0, 26.5, 26.2, 26.1. IR (film): ν (cm<sup>-1</sup>) 2974, 2923, 2847, 1720, 1468, 1446, 1432, 1365, 1347, 1316, 1255, 1221, 1140, 1080, 1024, 972, 883, 839, 766, 754, 734, 620, 512, 420; HR-MS (ESI) *m/z* calcd for C<sub>25</sub>H<sub>30</sub>NaO<sub>2</sub>S<sup>+</sup> [M+Na<sup>+</sup>] 417.18587, found 417.18596; [α]<sub>D</sub><sup>24.2</sup> = -16.8 (c = 0.1, CHCl<sub>3</sub>); HPLC conditions (er was determined by reducing the product to the corresponding alcohol with LiAlH<sub>4</sub>): AD-H column, hexane/2-propanol = 90/10, flow rate = 1.0 mL/min, λ = 254 nm, t<sub>R</sub> = 10.8 min (major), t<sub>R</sub> = 13.5 min (minor), 95:5 er.

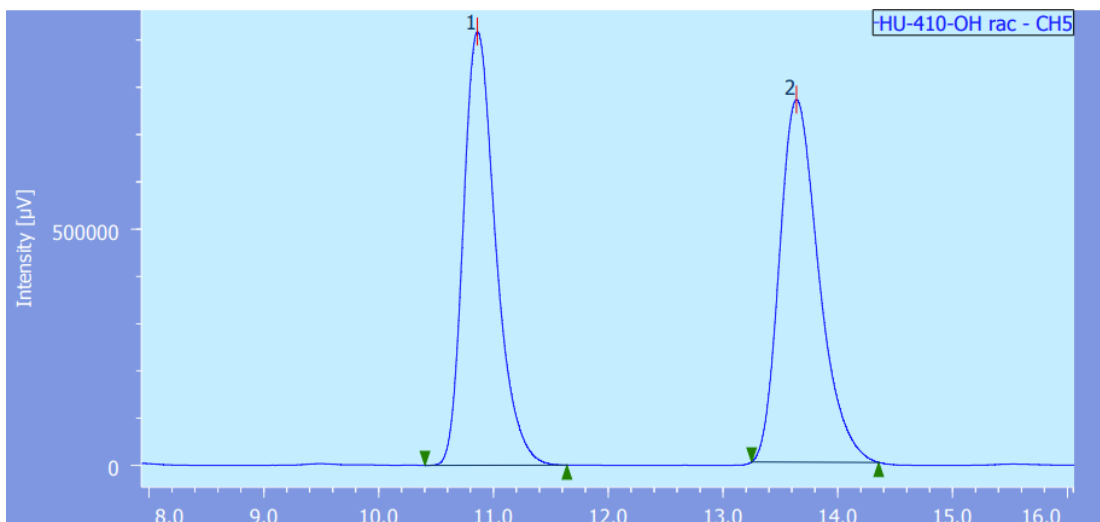

## Decision

| # | Peak Name | CH | tR [min] | Area [ $\mu\text{V}\cdot\text{sec}$ ] | Height [ $\mu\text{V}$ ] | Area%  | Height% | Quantity | NTP  | Resolution | Symmetry Factor | Warning |
|---|-----------|----|----------|---------------------------------------|--------------------------|--------|---------|----------|------|------------|-----------------|---------|
| 1 | Unknown   | 5  | 10.860   | 17952653                              | 916714                   | 49.544 | 54.463  | N/A      | 7450 | 4.964      | 1.319           |         |
| 2 | Unknown   | 5  | 13.637   | 18282854                              | 766485                   | 50.456 | 45.537  | N/A      | 7781 | N/A        | 1.326           |         |

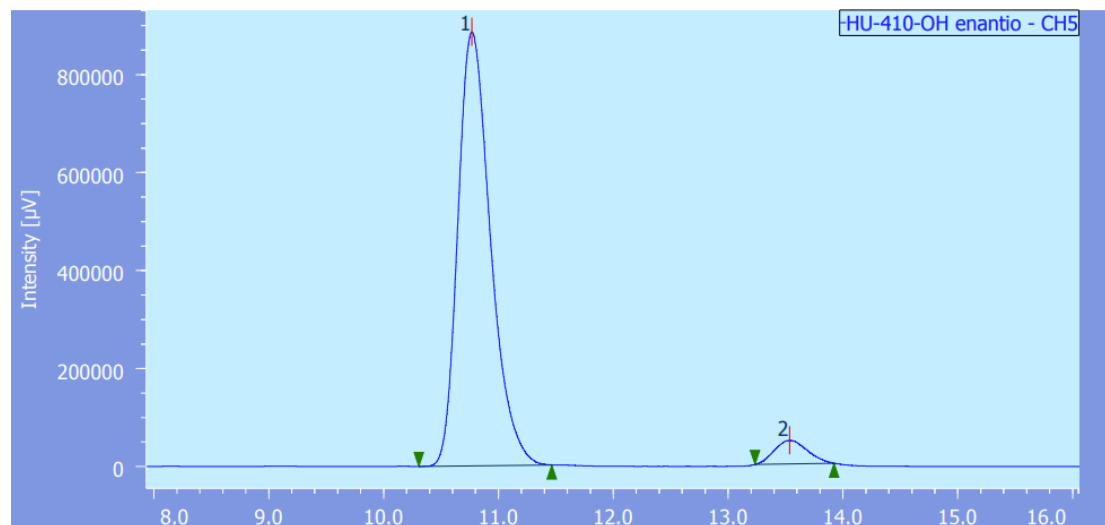

## Decision

| # | Peak Name | CH | tR [min] | Area [ $\mu\text{V}\cdot\text{sec}$ ] | Height [ $\mu\text{V}$ ] | Area%  | Height% | Quantity | NTP  | Resolution | Symmetry Factor | Warning |
|---|-----------|----|----------|---------------------------------------|--------------------------|--------|---------|----------|------|------------|-----------------|---------|
| 1 | Unknown   | 5  | 10.767   | 17463719                              | 885306                   | 94.785 | 94.842  | N/A      | 7115 | 5.259      | 1.336           |         |
| 2 | Unknown   | 5  | 13.533   | 960881                                | 48151                    | 5.215  | 5.158   | N/A      | 9887 | N/A        | 1.140           |         |

***tert*-Butyl (*R*)-3-cyclohexyl-2-(dibenzo[*b,d*]furan-2-yl)propanoate (33)**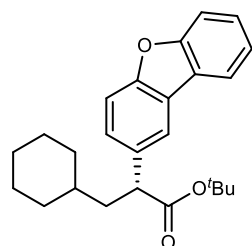

Prepared by **GP-B** (two 40 W 390 nm Kessile lamps were used). White solid, 40.1 mg, 53% yield. m.p. = 102-103 °C;  $^1\text{H}$  NMR (400 MHz,  $\text{CDCl}_3$ )  $\delta$  7.96 (ddd,  $J = 7.7, 1.3, 0.6$  Hz, 1H), 7.90 (d,  $J = 1.8$  Hz, 1H), 7.58 – 7.53 (m, 1H), 7.50 (d,  $J = 8.5$  Hz, 1H), 7.47 – 7.42 (m, 1H), 7.41 (dd,  $J = 8.5, 1.9$  Hz, 1H), 7.37 – 7.31 (m, 1H), 3.74 (t,  $J = 7.8$  Hz, 1H), 2.03 (ddd,  $J = 13.7, 8.3, 7.1$  Hz, 1H), 1.85 – 1.58 (m, 6H), 1.40 (s, 9H), 1.25 – 1.10 (m, 4H), 1.01 – 0.90 (m, 2H);  $^{13}\text{C}$  NMR (101

MHz,  $\text{CDCl}_3$ )  $\delta$  173.8, 156.5, 155.3, 134.7, 127.14, 127.07, 124.3, 124.2, 122.6, 120.7, 119.8, 111.6, 111.4, 80.5, 49.8, 41.6, 35.4, 33.3, 33.1, 28.0, 26.5, 26.18, 26.15. IR (film):  $\nu$  ( $\text{cm}^{-1}$ ) 2934, 2916, 2905, 2846, 2360, 1720, 1477, 1447, 1392, 1335, 1310, 1270, 1262, 1246, 1221, 1198, 1166, 1149, 1137, 1119, 1104, 1092, 1023, 972, 905, 884, 839, 826, 768, 753, 735, 620, 564, 461, 420; HR-MS (ESI)  $m/z$  calcd for  $\text{C}_{25}\text{H}_{30}\text{NaO}_3^+$  [ $\text{M}+\text{Na}^+$ ] 401.20872, found 401.20875;  $[\alpha]_{\text{D}}^{22.6} = -28.7$  ( $c = 0.1$ ,  $\text{CHCl}_3$ ); HPLC conditions: AD-H column (er was determined by reducing the product to the corresponding alcohol with  $\text{LiAlH}_4$ ), hexane/2-propanol = 90/10, flow rate = 1.0 mL/min,  $\lambda = 220$  nm,  $t_{\text{R}} = 9.9$  min (major),  $t_{\text{R}} = 11.1$  min (minor), 93:7 er.

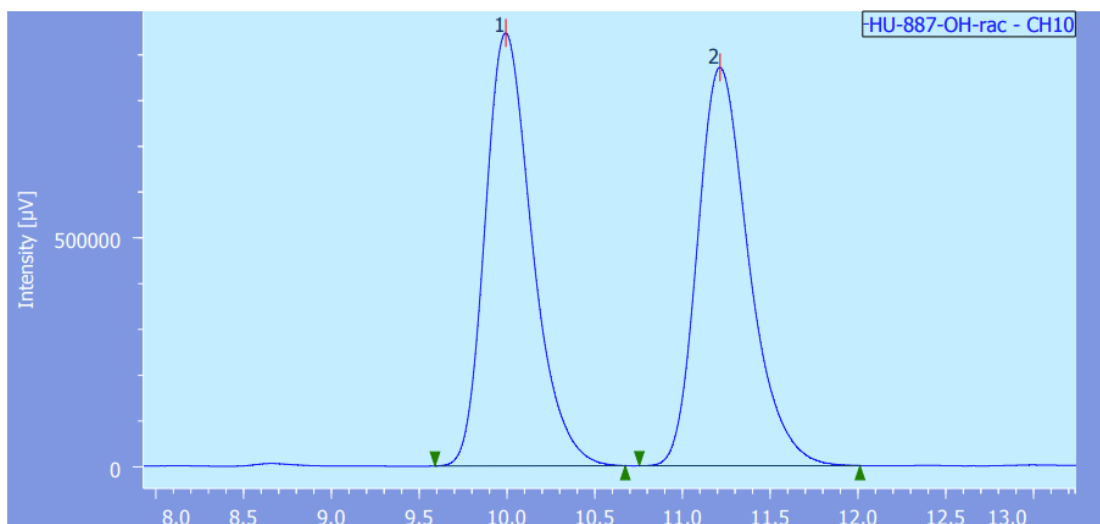

Decision

| # | Peak Name | CH | tR [min] | Area [μV·sec] | Height [μV] | Area%  | Height% | Quantity | NTP  | Resolution | Symmetry Factor | Warning |
|---|-----------|----|----------|---------------|-------------|--------|---------|----------|------|------------|-----------------|---------|
| 1 | Unknown   | 10 | 9.993    | 17626211      | 944998      | 49.863 | 52.065  | N/A      | 6898 | 2.434      | 1.292           |         |
| 2 | Unknown   | 10 | 11.213   | 17722721      | 870031      | 50.137 | 47.935  | N/A      | 7335 | N/A        | 1.292           |         |

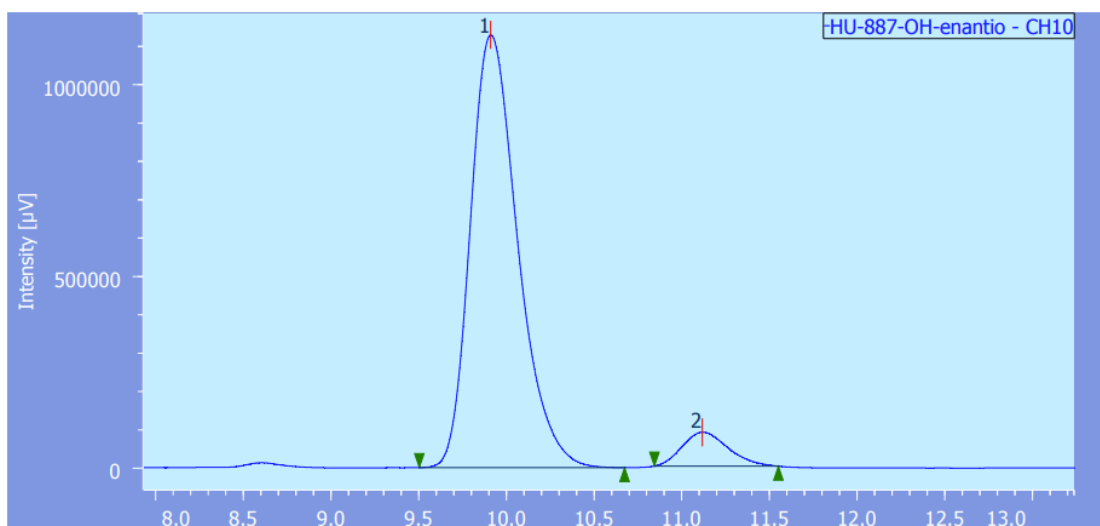

Decision

| # | Peak Name | CH | tR [min] | Area [μV·sec] | Height [μV] | Area%  | Height% | Quantity | NTP  | Resolution | Symmetry Factor | Warning |
|---|-----------|----|----------|---------------|-------------|--------|---------|----------|------|------------|-----------------|---------|
| 1 | Unknown   | 10 | 9.910    | 21159125      | 1127637     | 92.886 | 92.723  | N/A      | 6664 | 2.491      | 1.313           |         |
| 2 | Unknown   | 10 | 11.117   | 1620496       | 88494       | 7.114  | 7.277   | N/A      | 8384 | N/A        | 1.249           |         |

### *tert*-Butyl (*R*)-2-(benzo[d]thiazol-5-yl)-3-cyclohexylpropanoate (**34**)

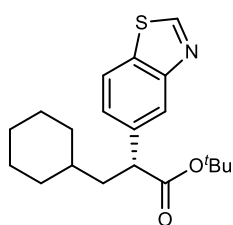

Prepared by **GP-B**. White solid, 50.0 mg, 72% yield. m.p. = 82-83 °C; <sup>1</sup>H NMR (400 MHz, CDCl<sub>3</sub>) δ 8.98 (s, 1H), 8.07 (d, *J* = 1.6 Hz, 1H), 7.89 (d, *J* = 8.3 Hz, 1H), 7.43 (dd, *J* = 8.3, 1.7 Hz, 1H), 3.75 (t, *J* = 7.8 Hz, 1H), 2.05 – 1.93 (m, 1H), 1.80 – 1.57 (m, 6H), 1.39 (s, 9H), 1.21 – 1.07 (m, 4H), 1.00 – 0.86 (m, 2H); <sup>13</sup>C NMR (101 MHz, CDCl<sub>3</sub>) δ 173.3, 154.2, 153.4, 138.7, 132.1, 125.7, 122.9, 121.7, 80.7, 49.8, 41.3, 35.3, 33.3, 33.0, 28.0, 26.5,

26.14, 26.10. IR (film): ν (cm<sup>-1</sup>) 3069, 2966, 2924, 2903, 2849, 1715, 1547, 1476, 1441, 1392, 1366, 1347, 1313, 1255, 1225, 1147, 1131, 1063, 936, 886, 859, 837, 828, 819, 674, 632, 510, 426; HR-MS (ESI) *m/z* calcd for C<sub>20</sub>H<sub>28</sub>NO<sub>2</sub>S<sup>+</sup> [M+H<sup>+</sup>] 346.18353, found 346.18341; [α]<sub>D</sub><sup>24.1</sup> = -19.9 (c = 0.1, CHCl<sub>3</sub>); HPLC conditions: Chiral-NR column, hexane/2-propanol = 99/1, flow rate = 1.0 mL/min, λ = 230 nm, t<sub>R</sub> = 23.9 min (minor), t<sub>R</sub> = 37.1 min (major), 95:5 er.

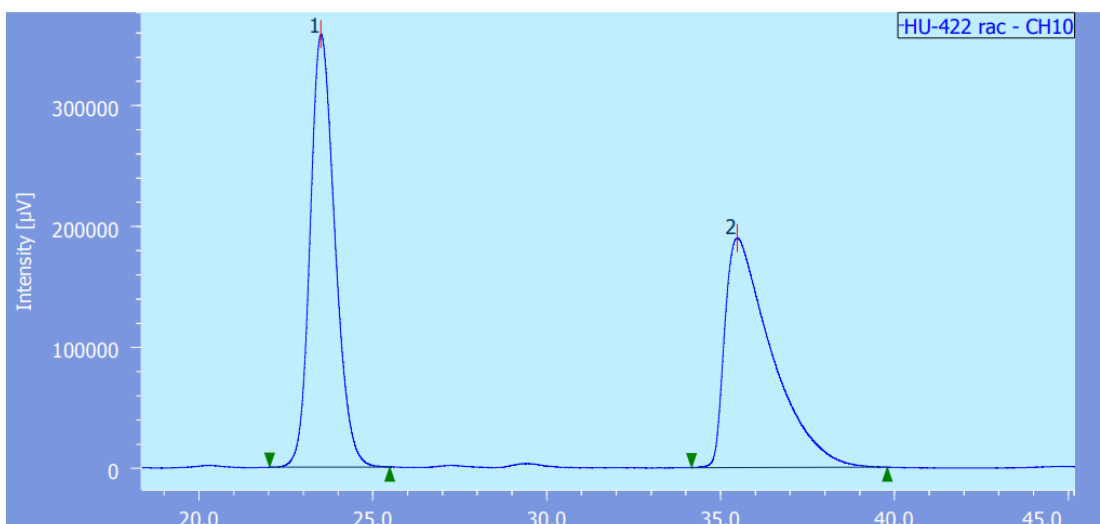

Decision

| # | Peak Name | CH | tR [min] | Area [µV·sec] | Height [µV] | Area%  | Height% | Quantity | NTP  | Resolution | Symmetry Factor | Warning |
|---|-----------|----|----------|---------------|-------------|--------|---------|----------|------|------------|-----------------|---------|
| 1 | Unknown   | 10 | 23.507   | 17710065      | 357598      | 49.956 | 65.359  | N/A      | 5331 | 6.552      | 1.201           |         |
| 2 | Unknown   | 10 | 35.470   | 17741246      | 189528      | 50.044 | 34.641  | N/A      | 3572 | N/A        | 2.511           |         |

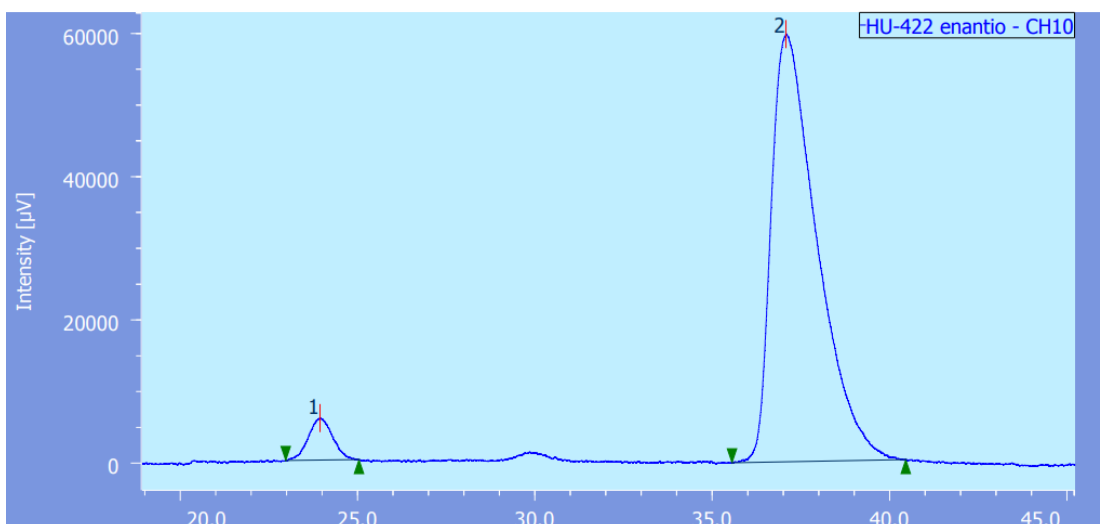

Decision

| # | Peak Name | CH | tR [min] | Area [µV·sec] | Height [µV] | Area%  | Height% | Quantity | NTP  | Resolution | Symmetry Factor | Warning |
|---|-----------|----|----------|---------------|-------------|--------|---------|----------|------|------------|-----------------|---------|
| 1 | Unknown   | 10 | 23.937   | 279491        | 5878        | 4.969  | 8.970   | N/A      | 6063 | 7.420      | 1.019           |         |
| 2 | Unknown   | 10 | 37.073   | 5345187       | 59656       | 95.031 | 91.030  | N/A      | 4083 | N/A        | 1.868           |         |

### *tert*-Butyl (*R*)-2-(2-chloropyridin-4-yl)-3-cyclohexylpropanoate (**35**)

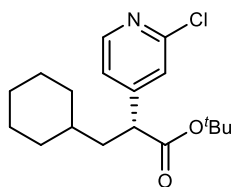

Prepared by **GP-B**. Colorless oil, 40.8 mg, 63% yield. <sup>1</sup>H NMR (400 MHz, CDCl<sub>3</sub>) δ 8.24 (d, *J* = 5.1 Hz, 1H), 7.21 (s, 1H), 7.10 (dd, *J* = 5.2, 1.5 Hz, 1H), 3.48 (dd, *J* = 8.3, 7.3 Hz, 1H), 1.85 (ddd, *J* = 13.8, 8.5, 7.0 Hz, 1H), 1.69 – 1.44 (m, 6H), 1.34 (s, 9H), 1.15 – 1.02 (m, 4H), 0.91 – 0.75 (m, 2H); <sup>13</sup>C NMR (101 MHz, CDCl<sub>3</sub>) δ 171.5, 152.2, 151.7, 149.6, 123.7, 121.9, 81.6, 49.2, 40.7, 35.4, 33.01, 32.97, 27.8, 26.3, 26.01, 26.00. IR (film): ν (cm<sup>-1</sup>) 2976, 2924, 2851, 2360, 2343, 1727, 1590, 1547, 1464, 1449, 1390, 1367, 1252, 1224, 1146, 1088, 990, 885, 840, 823, 754, 573, 502, 455, 418; HR-MS (ESI) *m/z* calcd for C<sub>18</sub>H<sub>27</sub>ClNO<sub>2</sub><sup>+</sup> [M+H<sup>+</sup>] 324.17248, found 324.17283; [α]<sub>D</sub><sup>24.2</sup> = -9.8 (c = 0.1, CHCl<sub>3</sub>); HPLC conditions: IC column, hexane/2-propanol = 95/5, flow rate = 1.0 mL/min, λ = 276 nm, t<sub>R</sub> = 15.2 min (minor), t<sub>R</sub> = 25.0 min (major), 96:4 er.



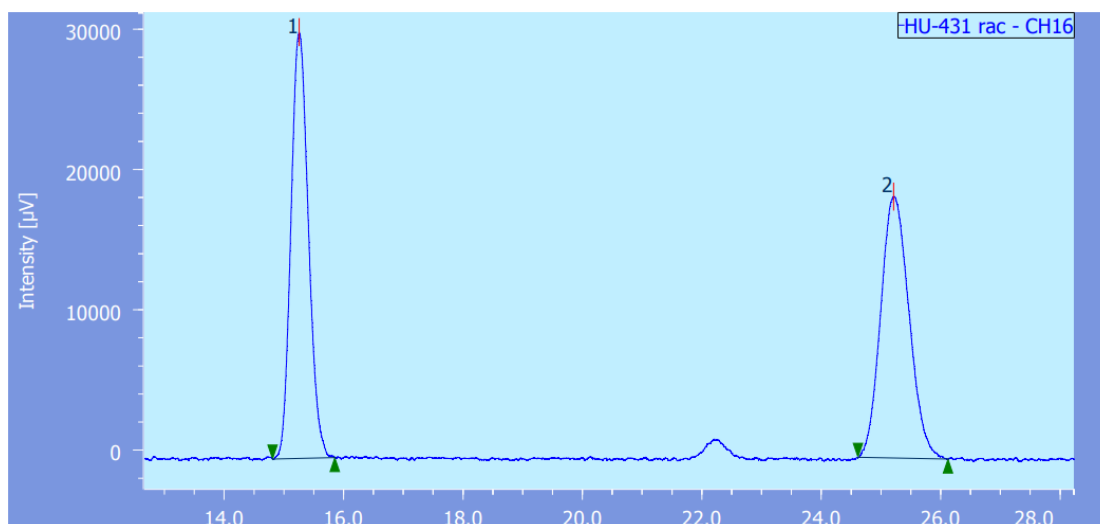

Decision

| # | Peak Name | CH | tR [min] | Area [µV·sec] | Height [µV] | Area%  | Height% | Quantity | NTP   | Resolution | Symmetry Factor | Warning |
|---|-----------|----|----------|---------------|-------------|--------|---------|----------|-------|------------|-----------------|---------|
| 1 | Unknown   | 16 | 15.257   | 615008        | 30354       | 49.997 | 61.982  | N/A      | 12908 | 14.068     | 1.143           |         |
| 2 | Unknown   | 16 | 25.210   | 615075        | 18619       | 50.003 | 38.018  | N/A      | 13082 | N/A        | 1.132           |         |

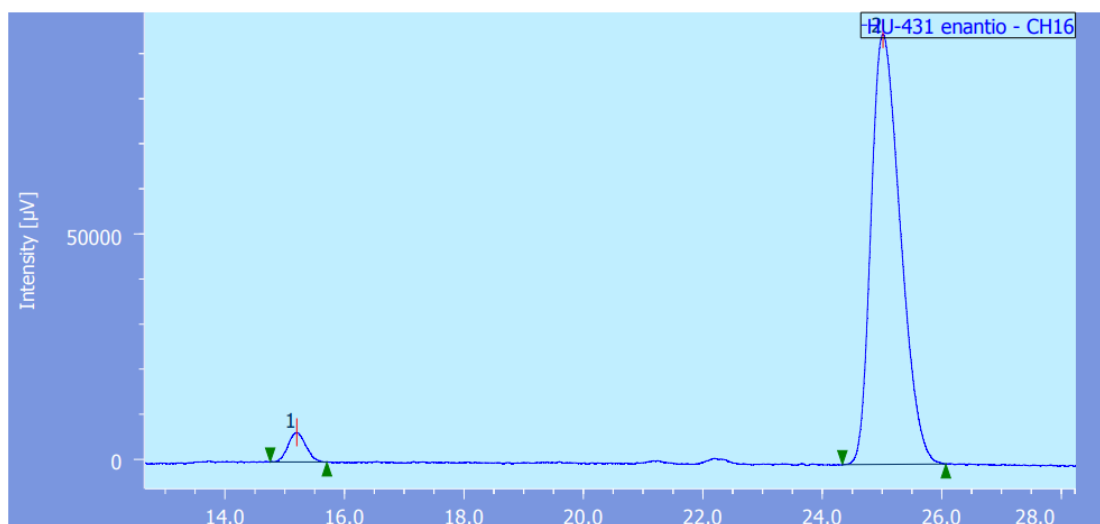

Decision

| # | Peak Name | CH | tR [min] | Area [µV·sec] | Height [µV] | Area%  | Height% | Quantity | NTP   | Resolution | Symmetry Factor | Warning |
|---|-----------|----|----------|---------------|-------------|--------|---------|----------|-------|------------|-----------------|---------|
| 1 | Unknown   | 16 | 15.200   | 135375        | 6566        | 4.002  | 6.444   | N/A      | 12331 | 13.484     | 1.093           |         |
| 2 | Unknown   | 16 | 25.013   | 3247556       | 95331       | 95.998 | 93.556  | N/A      | 12038 | N/A        | 1.338           |         |

### *tert*-Butyl (*R*)-3-cyclohexyl-2-(2-methylpyrimidin-5-yl)propanoate (**36**)

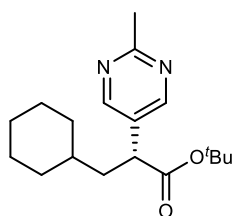

Prepared by **GP-A**. White solid, 43.8 mg, 72% yield. m.p. = 66-67 °C; <sup>1</sup>H NMR (400 MHz, CDCl<sub>3</sub>) δ 8.56 (s, 2H), 3.51 (t, *J* = 7.9 Hz, 1H), 2.71 (s, 3H), 1.93 (dt, *J* = 13.8, 7.7 Hz, 1H), 1.76 – 1.53 (m, 6H), 1.39 (s, 9H), 1.18 – 1.07 (m, 4H), 0.97 – 0.83 (m, 2H); <sup>13</sup>C NMR (101 MHz, CDCl<sub>3</sub>) δ 172.1, 166.8, 156.4, 129.9, 81.6, 45.2, 40.7, 35.2, 33.1, 32.8, 27.9, 26.3, 26.0, 26.0, 25.6. IR (film): ν (cm<sup>-1</sup>) 2980, 2919, 2849, 1718, 1589, 1555, 1445, 1412, 1395, 1368, 1347, 1328, 1272, 1248, 1227, 1147, 1125, 1048, 970, 902, 896, 875, 840, 754, 723, 652, 515; HR-MS (ESI) *m/z* calcd for C<sub>18</sub>H<sub>29</sub>N<sub>2</sub>O<sub>2</sub><sup>+</sup> [M+H<sup>+</sup>] 305.22235, found 305.22188; [α]<sub>D</sub><sup>24.2</sup> = -6.9 (c = 0.1, CHCl<sub>3</sub>); HPLC conditions: Chiral-NR column, hexane/2-propanol = 95/5, flow rate = 1.0 mL/min, λ = 230 nm, t<sub>R</sub> = 13.2 min (major), t<sub>R</sub> = 18.2 min (minor), 95:5 er.

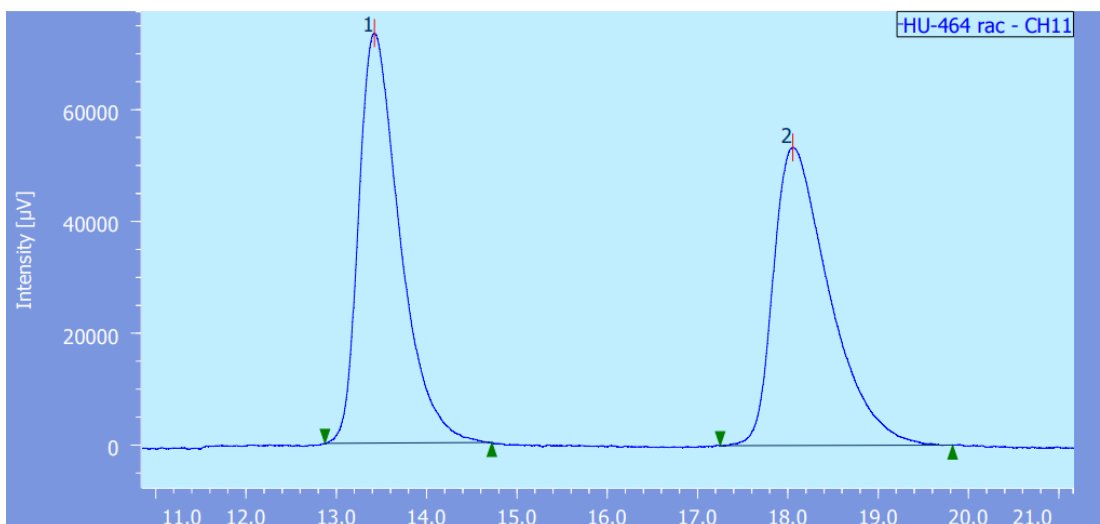

Decision

| # | Peak Name | CH | tR [min] | Area [µV·sec] | Height [µV] | Area%  | Height% | Quantity | NTP  | Resolution | Symmetry Factor | Warning |
|---|-----------|----|----------|---------------|-------------|--------|---------|----------|------|------------|-----------------|---------|
| 1 | Unknown   | 11 | 13.420   | 2327138       | 73307       | 50.295 | 57.899  | N/A      | 4425 | 4.861      | 1.564           |         |
| 2 | Unknown   | 11 | 18.053   | 2299807       | 53305       | 49.705 | 42.101  | N/A      | 4275 | N/A        | 1.703           |         |

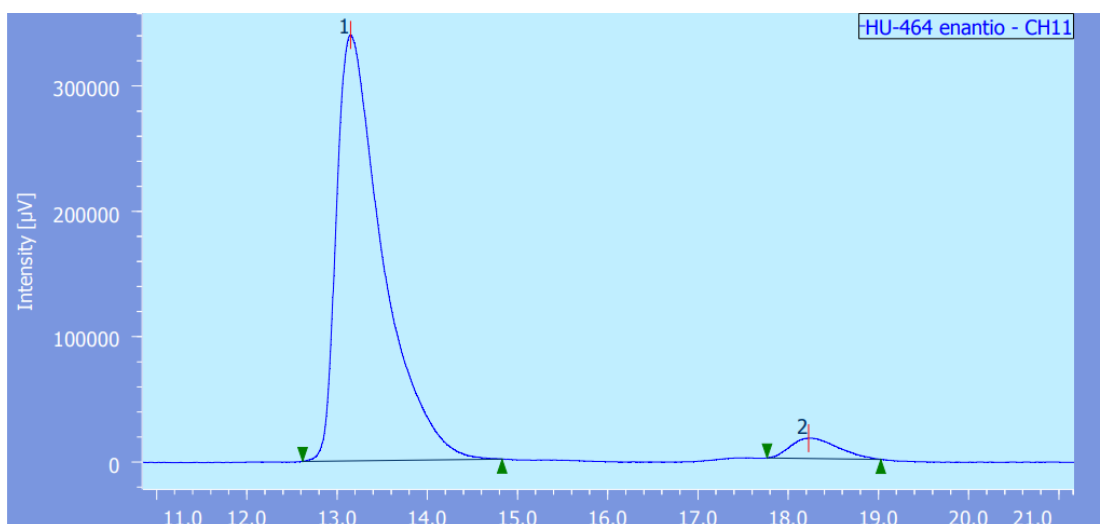

Decision

| # | Peak Name | CH | tR [min] | Area [µV·sec] | Height [µV] | Area%  | Height% | Quantity | NTP  | Resolution | Symmetry Factor | Warning |
|---|-----------|----|----------|---------------|-------------|--------|---------|----------|------|------------|-----------------|---------|
| 1 | Unknown   | 11 | 13.150   | 12053039      | 339526      | 95.290 | 95.421  | N/A      | 3659 | 5.449      | 2.140           |         |
| 2 | Unknown   | 11 | 18.223   | 595766        | 16292       | 4.710  | 4.579   | N/A      | 5341 | N/A        | 1.385           |         |

### *tert*-Butyl (*R*)-3-cyclohexyl-2-(quinolin-6-yl)propanoate (**37**)

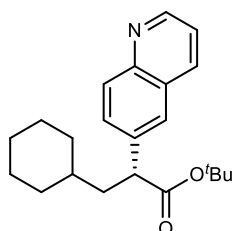

Prepared by **GP-A**. White solid, 44.2 mg, 65% yield. m.p. = 86-87 °C; <sup>1</sup>H NMR (400 MHz, CDCl<sub>3</sub>) δ 8.87 (dd, *J* = 4.2, 1.7 Hz, 1H), 8.13 (dd, *J* = 8.4, 1.0 Hz, 1H), 8.06 (d, *J* = 8.5 Hz, 1H), 7.75 – 7.67 (m, 2H), 7.38 (dd, *J* = 8.3, 4.2 Hz, 1H), 3.77 (t, *J* = 7.8 Hz, 1H), 2.02 (ddd, *J* = 13.8, 8.1, 7.2 Hz, 1H), 1.82 – 1.55 (m, 6H), 1.38 (s, 9H), 1.23 – 1.08 (m, 4H), 1.00 – 0.86 (m, 2H); <sup>13</sup>C NMR (101 MHz, CDCl<sub>3</sub>) δ 173.2, 150.0, 147.4, 138.5, 136.0, 129.9, 129.4, 128.2, 126.3, 121.1, 80.8, 49.8, 41.1, 35.4, 33.2, 33.0, 27.9, 26.4, 26.11, 26.09. IR (film): ν (cm<sup>-1</sup>) 2966, 2930, 2913, 2846, 1717, 1498, 1446, 1391, 1365, 1256, 1217, 1141, 1126, 1117, 895, 850, 838, 803, 777, 612, 481; HR-MS (ESI) *m/z* calcd for C<sub>22</sub>H<sub>30</sub>NO<sub>2</sub><sup>+</sup> [M+H<sup>+</sup>] 340.22711, found 340.22715; [α]<sub>D</sub><sup>24.2</sup> = -25.5 (c = 0.1, CHCl<sub>3</sub>); HPLC conditions: Chiral-NR column, hexane/2-propanol = 90/10, flow rate = 1.0 mL/min, λ = 230 nm, t<sub>R</sub> = 20.0 min (major),

$t_R = 22.8$  min (minor), 96:4 er.

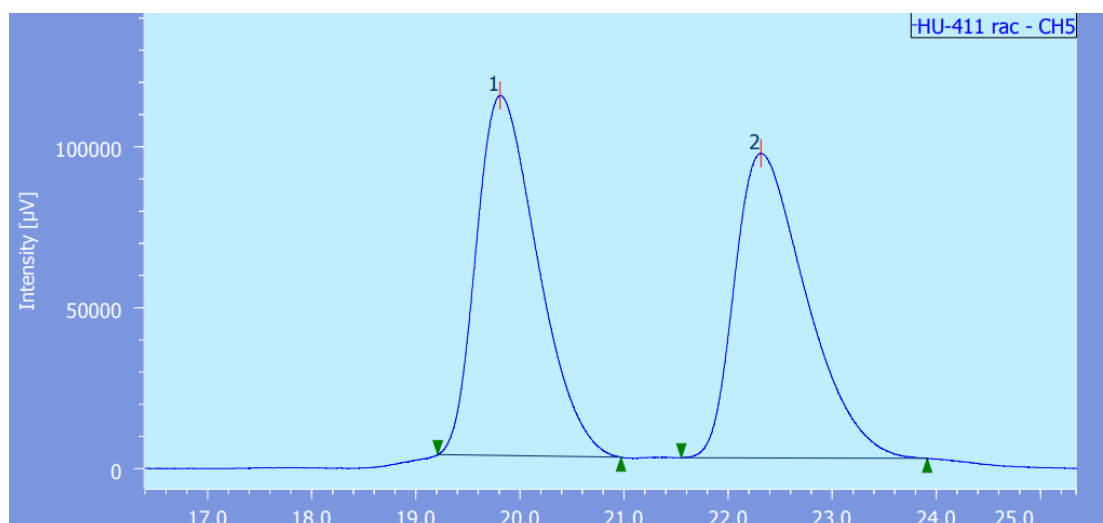

Decision

| # | Peak Name | CH | tR [min] | Area [µV·sec] | Height [µV] | Area%  | Height% | Quantity | NTP  | Resolution | Symmetry Factor | Warning |
|---|-----------|----|----------|---------------|-------------|--------|---------|----------|------|------------|-----------------|---------|
| 1 | Unknown   | 5  | 19.810   | 4595889       | 111773      | 50.337 | 54.161  | N/A      | 5239 | 2.129      | 1.416           |         |
| 2 | Unknown   | 5  | 22.313   | 4534372       | 94599       | 49.663 | 45.839  | N/A      | 4990 | N/A        | 1.559           |         |

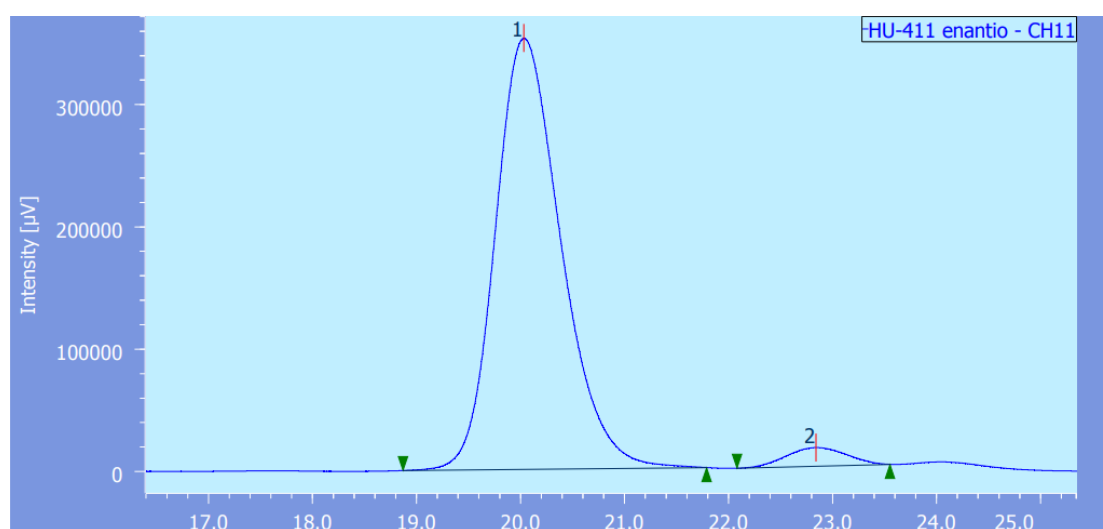

Decision

| # | Peak Name | CH | tR [min] | Area [µV·sec] | Height [µV] | Area%  | Height% | Quantity | NTP  | Resolution | Symmetry Factor | Warning |
|---|-----------|----|----------|---------------|-------------|--------|---------|----------|------|------------|-----------------|---------|
| 1 | Unknown   | 11 | 20.030   | 15479370      | 352428      | 96.151 | 95.853  | N/A      | 4975 | 2.495      | 1.246           |         |
| 2 | Unknown   | 11 | 22.840   | 619646        | 15249       | 3.849  | 4.147   | N/A      | 6627 | N/A        | 1.011           |         |

### *tert*-Butyl (*R*)-3-cyclohexyl-2-(quinolin-3-yl)propanoate (**38**)

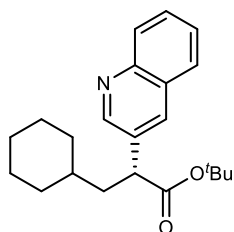

Prepared by GP-A. White solid, 42.2 mg, 62% yield. m.p. = 84–85 °C;  $^1\text{H}$  NMR (400 MHz,  $\text{CDCl}_3$ )  $\delta$  8.87 (d,  $J = 2.2$  Hz, 1H), 8.15 – 8.05 (m, 2H), 7.81 (d,  $J = 8.2$  Hz, 1H), 7.74 – 7.64 (m, 1H), 7.58 – 7.48 (m, 1H), 3.79 (t,  $J = 7.8$  Hz, 1H), 2.05 (dt,  $J = 13.9, 7.7$  Hz, 1H), 1.82 – 1.56 (m, 6H), 1.40 (s, 9H), 1.26 – 1.09 (m, 4H), 1.01 – 0.88 (m, 2H);  $^{13}\text{C}$  NMR (101 MHz,  $\text{CDCl}_3$ )  $\delta$  172.8, 151.1, 147.2, 134.3, 132.9, 129.2, 129.0,

128.0, 127.7, 126.7, 81.2, 47.6, 41.0, 35.4, 33.2, 33.0, 27.9, 26.4, 26.1, 26.0. IR (film):  $\nu$  ( $\text{cm}^{-1}$ ) 2976, 2931, 2913, 2844, 1721, 1569, 1493, 1447, 1392, 1367, 1344, 1317, 1261, 1214, 1147, 1130, 959, 905, 855, 843, 790, 754, 615, 483, 412; HR-MS (ESI)  $m/z$  calcd for  $\text{C}_{22}\text{H}_{30}\text{NO}_2^+$  [ $\text{M}+\text{H}^+$ ] 340.22711, found 340.22705;  $[\alpha]_D^{24.2} = -13.4$  ( $c = 0.1$ ,  $\text{CHCl}_3$ ); HPLC conditions: Chiral-NR column, hexane/2-

propanol = 90/10, flow rate = 1.0 mL/min,  $\lambda$  = 230 nm,  $t_R$  = 14.8 min (major),  $t_R$  = 16.8 min (minor), 95:5 er.

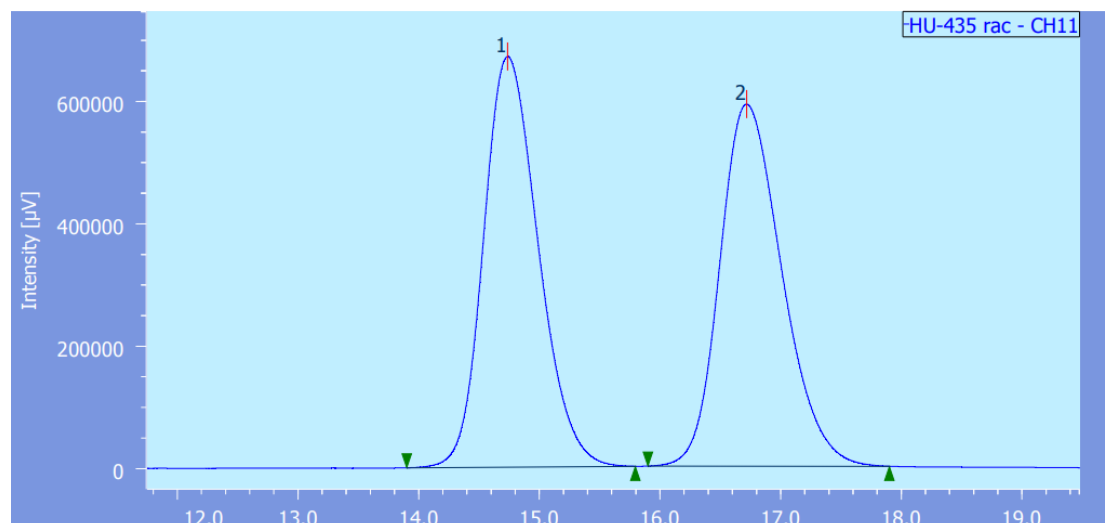

Decision

| # | Peak Name | CH | tR [min] | Area [ $\mu\text{V}\cdot\text{sec}$ ] | Height [ $\mu\text{V}$ ] | Area%  | Height% | Quantity | NTP  | Resolution | Symmetry Factor | Warning |
|---|-----------|----|----------|---------------------------------------|--------------------------|--------|---------|----------|------|------------|-----------------|---------|
| 1 | Unknown   | 11 | 14.737   | 21135417                              | 670649                   | 49.958 | 53.142  | N/A      | 5083 | 2.250      | 1.203           |         |
| 2 | Unknown   | 11 | 16.717   | 21170729                              | 591347                   | 50.042 | 46.858  | N/A      | 5081 | N/A        | 1.240           |         |

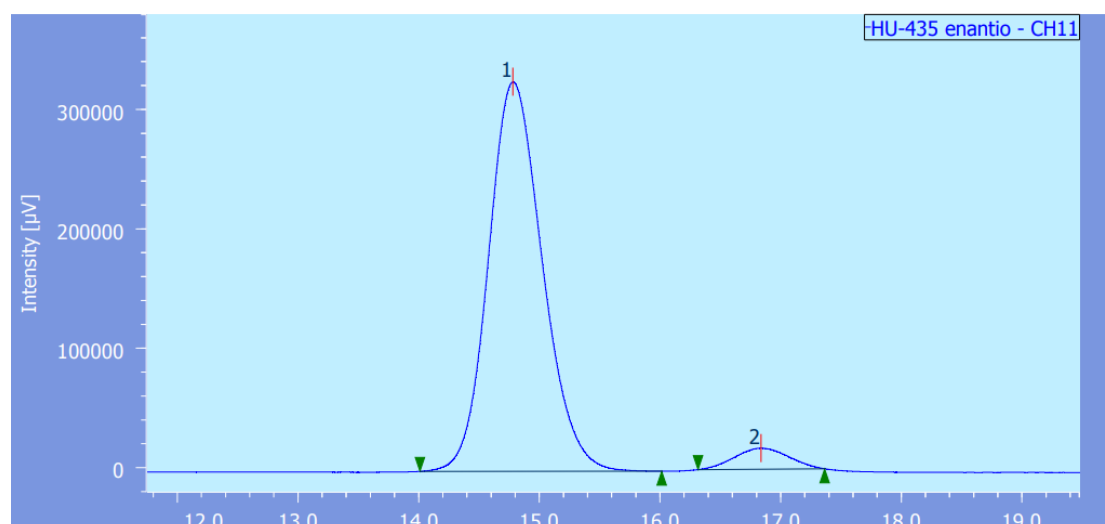

Decision

| # | Peak Name | CH | tR [min] | Area [ $\mu\text{V}\cdot\text{sec}$ ] | Height [ $\mu\text{V}$ ] | Area%  | Height% | Quantity | NTP  | Resolution | Symmetry Factor | Warning |
|---|-----------|----|----------|---------------------------------------|--------------------------|--------|---------|----------|------|------------|-----------------|---------|
| 1 | Unknown   | 11 | 14.780   | 10116198                              | 325982                   | 94.830 | 94.876  | N/A      | 5347 | 2.465      | 1.154           |         |
| 2 | Unknown   | 11 | 16.837   | 551570                                | 17606                    | 5.170  | 5.124   | N/A      | 6064 | N/A        | 1.016           |         |

### *tert*-Butyl (*R*)-3-cyclohexyl-2-(1*H*-inden-2-yl)propanoate (**39**)

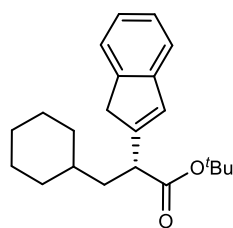

Prepared by **GP-B**. White solid, 37.9 mg, 58% yield. m.p. = 66-67 °C;  $^1\text{H}$  NMR (400 MHz,  $\text{CDCl}_3$ )  $\delta$  7.42 (d,  $J$  = 7.4 Hz, 1H), 7.32 (d,  $J$  = 7.4 Hz, 1H), 7.27 – 7.22 (m, 1H), 7.15 (td,  $J$  = 7.4, 1.2 Hz, 1H), 6.68 (s, 1H), 3.59 (t,  $J$  = 7.7 Hz, 1H), 3.50 – 3.35 (m, 2H), 1.85 (ddd,  $J$  = 13.7, 8.0, 7.2 Hz, 1H), 1.80 – 1.57 (m, 6H), 1.45 (s, 9H), 1.31 – 1.14 (m, 4H), 1.01 – 0.86 (m, 2H);  $^{13}\text{C}$  NMR (101 MHz,  $\text{CDCl}_3$ )  $\delta$  173.0, 147.2, 144.8, 143.2, 128.4, 126.2, 124.1, 123.5, 120.5, 80.6, 46.3, 39.7, 39.4, 35.4, 33.2, 33.1, 28.0, 26.5, 26.19, 26.15. IR (film):  $\nu$  ( $\text{cm}^{-1}$ ) 2978, 2920, 2846, 1720, 1607, 1461, 1446, 1388, 1364, 1345, 1308, 1268, 1257, 1245, 1212, 1148, 1137, 1121, 1088, 971, 879, 838, 749, 717, 559, 505, 416; HR-MS (ESI)  $m/z$  calcd for

$C_{22}H_{30}NaO_2^+$  [ $M+Na^+$ ] 349.21380, found 349.21378;  $[\alpha]_D^{24.2} = 17.3$  ( $c = 0.1$ ,  $CHCl_3$ ); HPLC conditions (er was determined by reducing the product to the corresponding alcohol with  $LiAlH_4$ ): AD-H column, hexane/2-propanol = 90/10, flow rate = 1.0 mL/min,  $\lambda = 254$  nm,  $t_R = 6.6$  min (major),  $t_R = 7.8$  min (minor), 93:7 er.

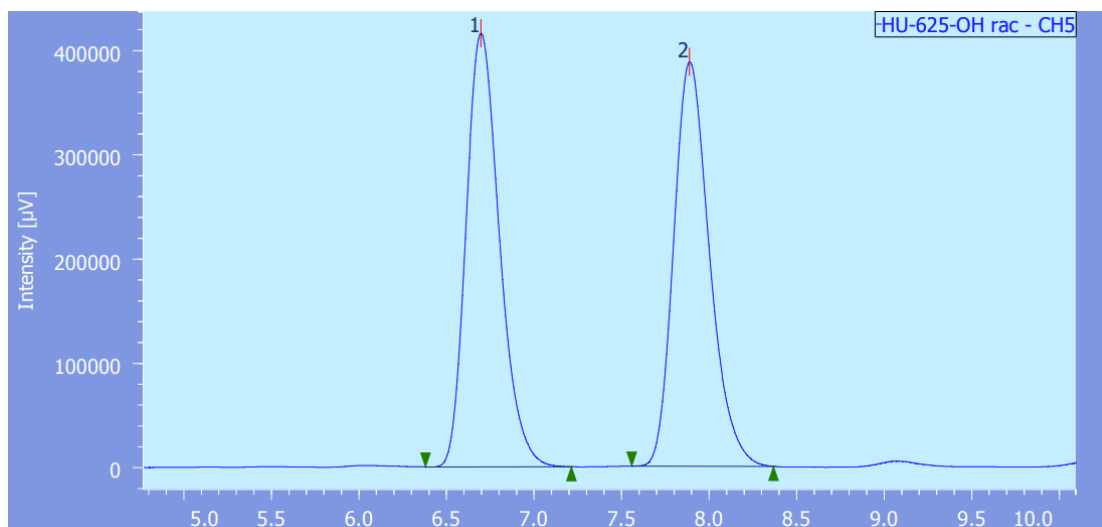

Decision

| # | Peak Name | CH | tR [min] | Area [µV·sec] | Height [µV] | Area%  | Height% | Quantity | NTP  | Resolution | Symmetry Factor | Warning |
|---|-----------|----|----------|---------------|-------------|--------|---------|----------|------|------------|-----------------|---------|
| 1 | Unknown   | 5  | 6.697    | 5524149       | 415555      | 50.113 | 51.735  | N/A      | 5958 | 3.339      | 1.255           |         |
| 2 | Unknown   | 5  | 7.887    | 5499255       | 387686      | 49.887 | 48.265  | N/A      | 7360 | N/A        | 1.268           |         |

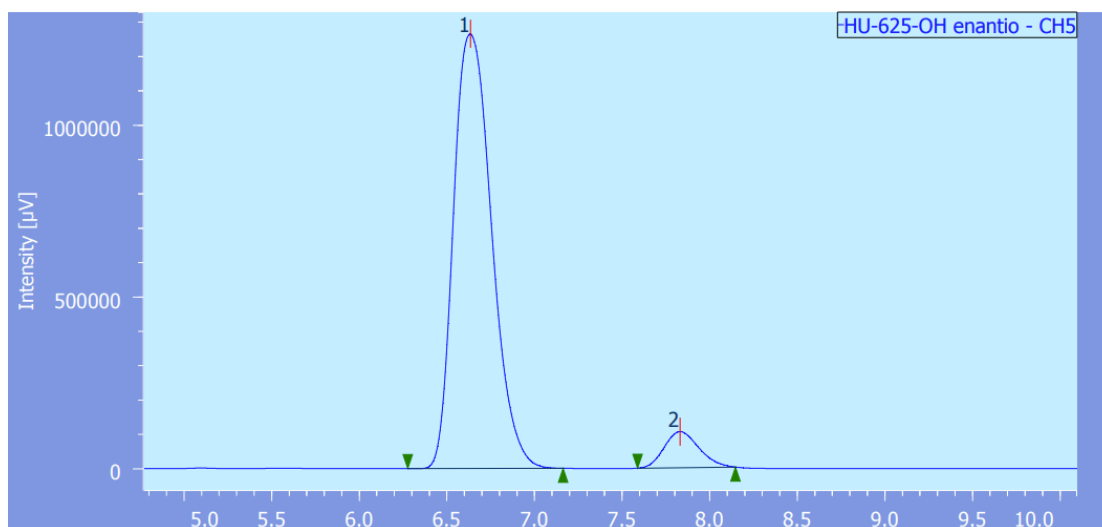

Decision

| # | Peak Name | CH | tR [min] | Area [µV·sec] | Height [µV] | Area%  | Height% | Quantity | NTP  | Resolution | Symmetry Factor | Warning |
|---|-----------|----|----------|---------------|-------------|--------|---------|----------|------|------------|-----------------|---------|
| 1 | Unknown   | 5  | 6.633    | 19197810      | 1264562     | 92.982 | 92.330  | N/A      | 4308 | 3.115      | 1.272           |         |
| 2 | Unknown   | 5  | 7.830    | 1449038       | 105043      | 7.018  | 7.670   | N/A      | 7317 | N/A        | 1.185           |         |

#### *tert*-Butyl (*R, E*)-2-(cyclohexylmethyl)-4-phenylbut-3-enoate (**40**)

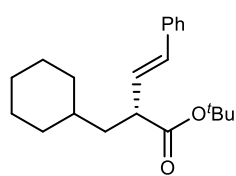

Prepared by **GP-B**. White solid, 36.0 mg, 57% yield. m.p. = 62-63 °C;  $^1H$  NMR (400 MHz,  $CDCl_3$ )  $\delta$  7.40 – 7.35 (m, 2H), 7.33 – 7.27 (m, 2H), 7.25 – 7.19 (m, 1H), 6.44 (d,  $J = 15.9$  Hz, 1H), 6.16 (dd,  $J = 15.9, 8.9$  Hz, 1H), 3.17 (dd,  $J = 16.3, 7.9$  Hz, 1H), 1.80 – 1.61 (m, 7H), 1.46 (s, 9H), 1.28 – 1.14 (m, 4H), 0.97 – 0.85 (m, 2H);  $^{13}C$  NMR (101 MHz,  $CDCl_3$ )  $\delta$  173.7, 137.2, 131.3, 128.8, 128.5, 127.3, 126.3, 80.5, 48.0, 40.4, 35.2, 33.3, 33.0, 28.1, 26.5, 26.22, 26.16. IR (film):  $\nu$  ( $cm^{-1}$ ) 2982, 2921, 2903, 2846, 1718, 1476, 1462, 1446, 1388, 1366, 1344, 1256, 1232,

1205, 1146, 1125, 982, 974, 887, 853, 843, 774, 743, 702, 691, 506, 484; HR-MS (ESI) m/z calcd for  $C_{21}H_{30}NaO_2^+$  [M+Na<sup>+</sup>] 337.21380, found 337.21404;  $[\alpha]_D^{24.2} = -38.7$  (c = 0.1, CHCl<sub>3</sub>); HPLC conditions: IB column, hexane/2-propanol = 99.8/0.2, flow rate = 0.5 mL/min,  $\lambda = 254$  nm,  $t_R = 16.3$  min (major),  $t_R = 17.8$  min (minor), 85:15 er.

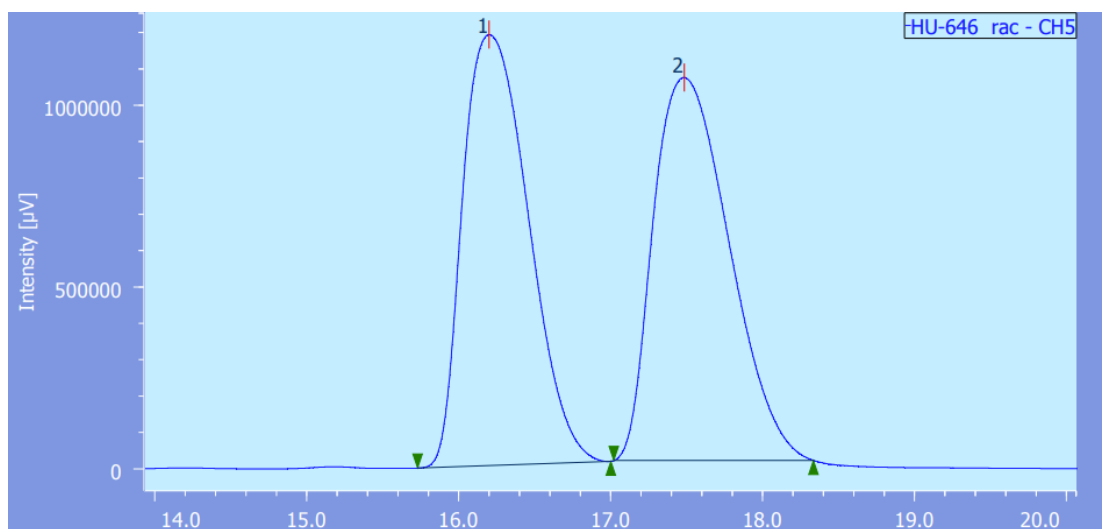

Decision

| # | Peak Name | CH | tR [min] | Area [μV·sec] | Height [μV] | Area%  | Height% | Quantity | NTP  | Resolution | Symmetry Factor | Warning |
|---|-----------|----|----------|---------------|-------------|--------|---------|----------|------|------------|-----------------|---------|
| 1 | Unknown   | 5  | 16.200   | 35700384      | 1184868     | 49.349 | 52.943  | N/A      | 6122 | 1.442      | 1.385           |         |
| 2 | Unknown   | 5  | 17.483   | 36641708      | 1053157     | 50.651 | 47.057  | N/A      | 5352 | N/A        | 1.394           |         |

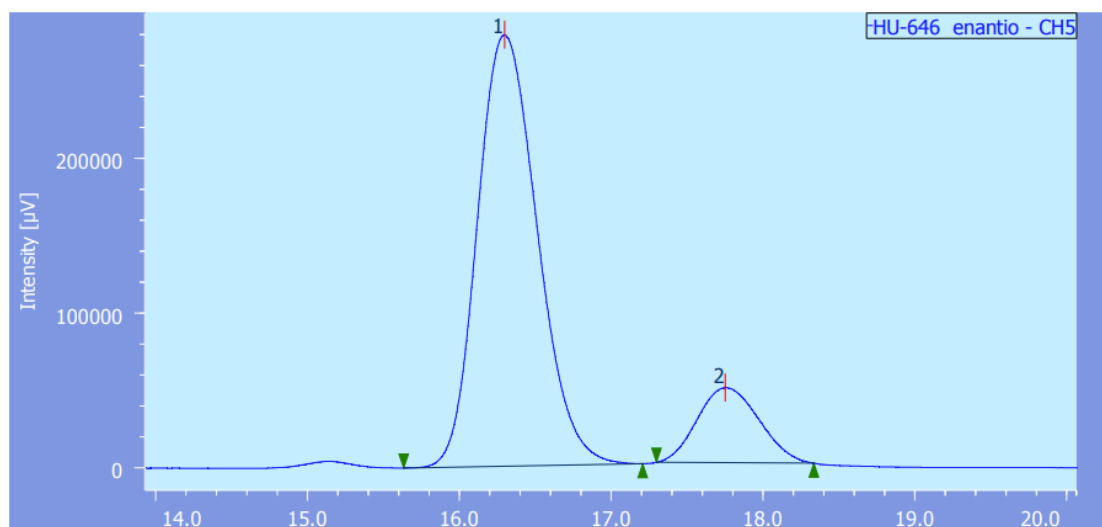

Decision

| # | Peak Name | CH | tR [min] | Area [μV·sec] | Height [μV] | Area%  | Height% | Quantity | NTP  | Resolution | Symmetry Factor | Warning |
|---|-----------|----|----------|---------------|-------------|--------|---------|----------|------|------------|-----------------|---------|
| 1 | Unknown   | 5  | 16.297   | 7629311       | 278622      | 84.780 | 85.161  | N/A      | 8031 | 1.944      | 1.193           |         |
| 2 | Unknown   | 5  | 17.750   | 1369643       | 48550       | 15.220 | 14.839  | N/A      | 8464 | N/A        | 1.129           |         |

**(3aR, 5R, 6S, 6aR)-5-((R)-2, 2-Dimethyl-1,3-dioxolan-4-yl)-2, 2-dimethyltetrahydrofuro[2, 3-d][1,3]dioxol-6-yl 4-((R)-1-(tert-butoxy)-3-cyclohexyl-1-oxopropan-2-yl)benzoate (41)**

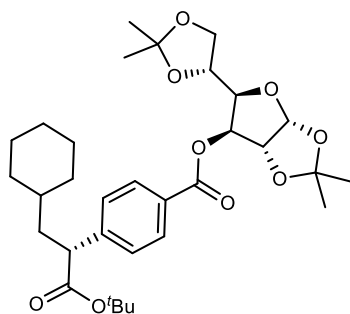

Prepared by **GP-A**. White solid, 83.6 mg, 73% yield. m.p. = 78–79 °C; <sup>1</sup>H NMR (400 MHz, CDCl<sub>3</sub>) δ 7.99 – 7.93 (m, 2H), 7.41 – 7.35 (m, 2H), 5.93 (d, *J* = 3.7 Hz, 1H), 5.48 (d, *J* = 2.8 Hz, 1H), 4.61 (d, *J* = 3.7 Hz, 1H), 4.40 – 4.30 (m, 2H), 4.15 – 4.05 (m, 2H), 3.64 (t, *J* = 7.8 Hz, 1H), 1.99 – 1.88 (m, 1H), 1.76 – 1.57 (m, 6H), 1.55 (s, 3H), 1.41 (s, 3H), 1.38 (s, 9H), 1.31 (s, 3H), 1.27 (s, 3H), 1.19 – 1.05 (m, 4H), 0.90 (dd, *J* = 21.9, 10.4 Hz, 2H); <sup>13</sup>C NMR (101 MHz, CDCl<sub>3</sub>) δ 172.7, 165.1, 146.0, 129.9, 128.1, 112.3, 109.4, 105.1, 83.4, 80.9, 79.9, 76.6, 72.6, 67.2, 50.0, 40.9, 35.4,

33.2, 33.0, 27.9, 26.8, 26.7, 26.4, 26.2, 26.11, 26.07, 25.2. IR (film): ν (cm<sup>-1</sup>) 2980, 2924, 2852, 2358, 2341, 1718, 1609, 1449, 1369, 1305, 1268, 1219, 1147, 1095, 1074, 1018, 890, 853, 843, 757, 735, 703, 634, 512; HR-MS (ESI) *m/z* calcd for C<sub>32</sub>H<sub>46</sub>NaO<sub>9</sub><sup>+</sup> [*M*+Na<sup>+</sup>] 597.30340, found 597.30331; [α]<sub>D</sub><sup>24.2</sup> = -24.3 (c = 0.1, CHCl<sub>3</sub>); d.r.>20:1.

**(8R, 9S, 13S, 14S)-13-Methyl-17-oxo-7, 8, 9, 11, 12, 13, 14, 15, 16, 17-decahydro-6H-cyclopenta[*a*]phenanthren-3-yl 4-((R)-1-(tert-butoxy)-3-cyclohexyl-1-oxopropan-2-yl)benzoate (42)**

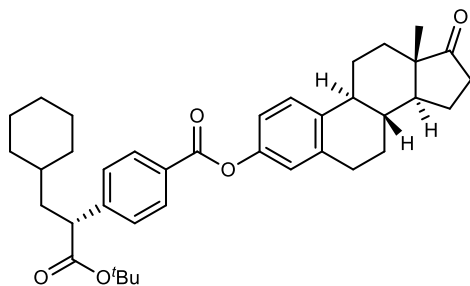

Prepared by **GP-A**. White solid, 79.8 mg, 68% yield. m.p. = 76–77 °C; <sup>1</sup>H NMR (400 MHz, CDCl<sub>3</sub>) δ 8.16 – 8.10 (m, 2H), 7.47 – 7.40 (m, 2H), 7.35 – 7.30 (m, 1H), 7.00 – 6.91 (m, 2H), 3.67 (t, *J* = 7.8 Hz, 1H), 2.97 – 2.89 (m, 2H), 2.51 (dd, *J* = 18.8, 8.6 Hz, 1H), 2.46 – 2.39 (m, 1H), 2.32 (td, *J* = 10.7, 3.7 Hz, 1H), 2.20 – 2.12 (m, 1H), 2.11 – 2.02 (m, 2H), 2.01 – 1.94 (m, 2H), 1.78 – 1.58 (m, 8H), 1.57 – 1.43 (m, 4H), 1.40 (s, 9H),

1.21 – 1.09 (m, 4H), 0.98 – 0.87 (m, 5H); <sup>13</sup>C NMR (101 MHz, CDCl<sub>3</sub>) δ 220.8, 172.7, 165.3, 148.8, 146.1, 138.0, 137.4, 130.3, 128.2, 128.1, 126.4, 121.7, 118.8, 80.9, 50.4, 50.1, 47.9, 44.2, 40.9, 38.0, 35.8, 35.4, 33.3, 33.0, 31.6, 29.4, 27.9, 26.4, 26.3, 26.13, 26.10, 25.8, 21.6, 13.8. IR (film): ν (cm<sup>-1</sup>) 3312, 2975, 2924, 2852, 1732, 1608, 1494, 1450, 1367, 1260, 1223, 1209, 1177, 1144, 1069, 1017, 1007, 840, 815, 755, 732, 698; HR-MS (ESI) *m/z* calcd for C<sub>38</sub>H<sub>48</sub>NaO<sub>5</sub><sup>+</sup> [*M*+Na<sup>+</sup>] 607.33940, found 607.33929; [α]<sub>D</sub><sup>24.3</sup> = 55.5 (c = 0.1, CHCl<sub>3</sub>); d.r.>20:1.

**(1S, 2R, 5S)-2-Isopropyl-5-methylcyclohexyl 4-((R)-1-(tert-butoxy)-3-cyclohexyl-1-oxopropan-2-yl)benzoate (43)**

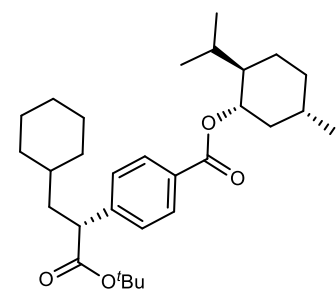

Prepared by **GP-A**. Colorless oil, 65.6 mg, 70% yield. <sup>1</sup>H NMR (400 MHz, CDCl<sub>3</sub>) δ 8.02 – 7.93 (m, 2H), 7.40 – 7.32 (m, 2H), 4.92 (td, *J* = 10.9, 4.4 Hz, 1H), 3.63 (t, *J* = 7.8 Hz, 1H), 2.17 – 2.07 (m, 1H), 2.02 – 1.88 (m, 2H), 1.79 – 1.49 (m, 10H), 1.38 (s, 9H), 1.20 – 1.05 (m, 6H), 0.98 – 0.85 (m, 9H), 0.81 (d, *J* = 8.2 Hz, 3H); <sup>13</sup>C NMR (101 MHz, CDCl<sub>3</sub>) δ 172.9, 166.0, 145.1, 129.7, 129.5, 127.9, 80.8, 74.7, 49.9, 47.2, 41.00, 40.97, 35.3, 34.3, 33.2, 33.0, 31.4, 27.9, 26.44, 26.40, 26.11, 26.07, 23.6, 22.0, 20.8, 16.4. IR (film): ν

(cm<sup>-1</sup>) 2954, 2924, 2868, 2851, 1714, 1610, 1450, 1367, 1273, 1178, 1144, 1129, 1110, 1020, 982, 962, 915, 857, 842, 756, 733, 704, 474, 466; HR-MS (ESI) *m/z* calcd for C<sub>30</sub>H<sub>46</sub>NaO<sub>4</sub><sup>+</sup> [*M*+Na<sup>+</sup>]

493.32883, found 493.32920;  $[\alpha]_D^{24.2} = -47.3$  ( $c = 0.1$ ,  $\text{CHCl}_3$ ); d.r.>20:1.

**(3*S*, 8*R*, 9*S*, 10*S*, 13*R*, 14*S*, 17*R*)-10, 13-Dimethyl-17-((*R*)-6-methylheptan-2-yl)hexadecahydro-1*H*-cyclopenta[*a*]phenanthren-3-yl 4-((*R*)-1-(*tert*-butoxy)-3-cyclohexyl-1-oxopropan-2-yl)benzoate (44)**

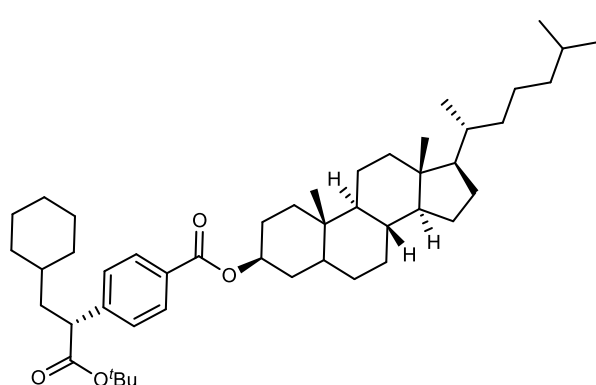

Prepared by **GP-A**. Colorless oil, 57.5 mg, 41% yield.  $^1\text{H NMR}$  (400 MHz,  $\text{CDCl}_3$ )  $\delta$  8.00 – 7.94 (m, 2H), 7.39 – 7.31 (m, 2H), 4.99 – 4.87 (m, 1H), 3.62 (t,  $J = 7.8$  Hz, 1H), 2.01 – 1.90 (m, 3H), 1.86 – 1.77 (m, 2H), 1.76 – 1.64 (m, 7H), 1.63 – 1.58 (m, 3H), 1.55 – 1.47 (m, 3H), 1.37 (s, 9H), 1.35 – 1.20 (m, 10H), 1.17 – 1.07 (m, 9H), 1.05 – 0.97 (m, 3H), 0.94 – 0.82 (m, 15H), 0.67 (d,  $J = 8.8$  Hz, 4H);  $^{13}\text{C NMR}$  (101 MHz,

$\text{CDCl}_3$ )  $\delta$  172.9, 166.0, 145.0, 129.7, 129.6, 127.8, 80.7, 74.3, 56.4, 56.3, 54.2, 50.0, 44.7, 42.6, 40.9, 40.0, 39.5, 36.8, 36.2, 35.8, 35.51, 35.49, 35.4, 34.1, 33.3, 33.0, 32.0, 28.6, 28.2, 28.0, 27.9, 27.6, 26.4, 26.13, 26.09, 24.2, 23.8, 22.8, 22.6, 21.2, 18.7, 12.3, 12.1. IR (film):  $\nu$  ( $\text{cm}^{-1}$ ) 2924, 2850, 1721, 1708, 1610, 1465, 1446, 1378, 1365, 1276, 1255, 1221, 1184, 1146, 1110, 1021, 1006, 852, 840, 757, 708, 414; HR-MS (ESI)  $m/z$  calcd for  $\text{C}_{47}\text{H}_{74}\text{NaO}_4^+$   $[\text{M}+\text{Na}^+]$  725.54793, found 725.54807;  $[\alpha]_D^{24.2} = 6.5$  ( $c = 0.1$ ,  $\text{CHCl}_3$ ); d.r.>20:1.

**(*R*)-2,5,7,8-Tetramethyl-2-((4*R*, 8*R*)-4, 8, 12-trimethyltridecyl)chroman-6-yl 4-((*R*)-1-(*tert*-butoxy)-3-cyclohexyl-1-oxopropan-2-yl)benzoate (45)**

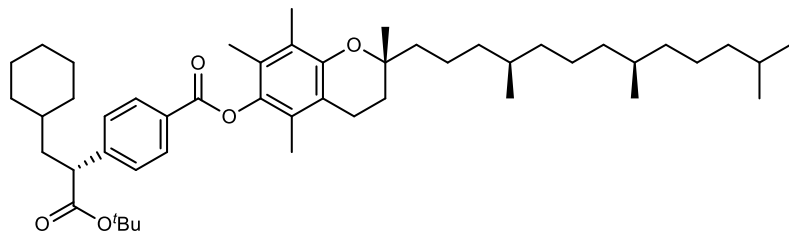

Prepared by **GP-A**. Colorless oil, 63.4 mg, 42% yield.  $^1\text{H NMR}$  (400 MHz,  $\text{CDCl}_3$ )  $\delta$  8.23 – 8.16 (m, 2H), 7.51 – 7.41 (m, 2H), 3.70 (t,  $J = 7.8$  Hz, 1H), 2.63 (t,  $J = 6.7$  Hz, 2H),

2.13 (s, 3H), 2.07 (s, 3H), 2.03 (s, 3H), 2.01 – 1.93 (m, 1H), 1.89 – 1.60 (m, 9H), 1.60 – 1.50 (m, 3H), 1.45 – 1.36 (m, 12H), 1.33 – 1.23 (m, 10H), 1.23 – 1.03 (m, 11H), 1.01 – 0.91 (m, 2H), 0.90 – 0.83 (m, 12H);  $^{13}\text{C NMR}$  (101 MHz,  $\text{CDCl}_3$ )  $\delta$  172.8, 165.0, 149.4, 145.9, 140.6, 130.3, 128.2, 128.1, 126.9, 125.1, 123.1, 117.4, 80.9, 75.0, 50.0, 41.1, 40.4, 39.6, 39.4, 37.4, 37.3, 35.4, 33.2, 33.0, 32.8, 32.7, 31.2, 31.0, 27.9, 26.5, 26.14, 26.10, 24.8, 24.4, 24.2, 23.7, 22.7, 22.6, 21.0, 20.6, 19.7, 19.6, 13.1, 12.2, 11.8. IR (film):  $\nu$  ( $\text{cm}^{-1}$ ) 2924, 2852, 1731, 1611, 1451, 1414, 1377, 1367, 1273, 1235, 1178, 1146, 1090, 1018, 913, 855, 842, 756, 733, 702; HR-MS (ESI)  $m/z$  calcd for  $\text{C}_{49}\text{H}_{76}\text{NaO}_5^+$   $[\text{M}+\text{Na}^+]$  767.55850, found 767.55824;  $[\alpha]_D^{24.2} = -6.0$  ( $c = 0.1$ ,  $\text{CHCl}_3$ ); d.r.>20:1.

***tert*-Butyl (*R*)-2-(4-cyanophenyl)-3-cyclopentylpropanoate (46)**

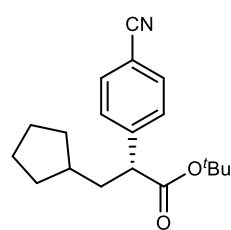

Prepared by **GP-A**. White solid, 42.6 mg, 71% yield. m.p. = 65-66 °C;  $^1\text{H NMR}$  (400 MHz,  $\text{CDCl}_3$ )  $\delta$  7.63 – 7.57 (m, 2H), 7.44 – 7.38 (m, 2H), 3.54 (t,  $J = 7.7$  Hz, 1H), 2.04 (dt,  $J = 13.5, 7.7$  Hz, 1H), 1.79 – 1.68 (m, 3H), 1.65 – 1.56 (dt,  $J = 11.3, 7.7$  Hz, 3H), 1.51 – 1.43 (m, 2H), 1.39 (s, 9H), 1.17 – 1.03 (m, 2H);  $^{13}\text{C NMR}$  (101 MHz,  $\text{CDCl}_3$ )  $\delta$  172.3, 145.4, 132.2, 128.8, 118.8, 110.8, 81.2, 52.1, 39.7, 37.9, 32.7, 32.3, 27.9, 25.05, 25.01. IR (film):



$\nu$  ( $\text{cm}^{-1}$ ) 2976, 2944, 2917, 2860, 2229, 1721, 1605, 1505, 1447, 1440, 1390, 1366, 1350, 1290, 1249, 1210, 1149, 1136, 1089, 1022, 859, 839, 783, 757, 554, 482; HR-MS (ESI)  $m/z$  calcd for  $\text{C}_{19}\text{H}_{25}\text{NNaO}_2^+$  [ $\text{M}+\text{Na}^+$ ] 322.17775, found 322.17736;  $[\alpha]_{\text{D}}^{24.1} = -17.8$  ( $c = 0.1$ ,  $\text{CHCl}_3$ ); HPLC conditions: Chiral-NR column, hexane/2-propanol = 98/2, flow rate = 1.0 mL/min,  $\lambda = 230$  nm,  $t_{\text{R}} = 15.1$  min (minor),  $t_{\text{R}} = 19.4$  min (major), 97:3 er.

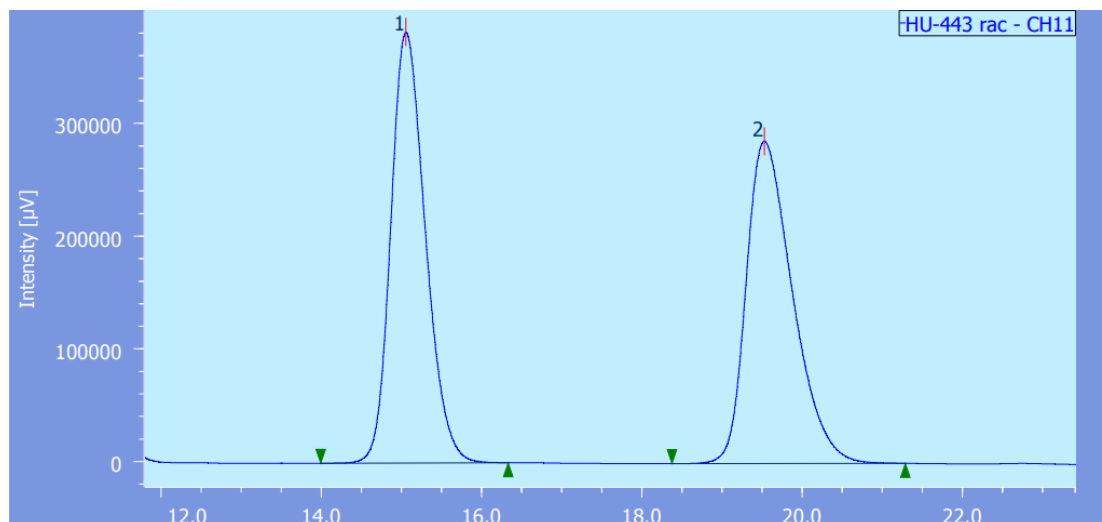

Decision

| # | Peak Name | CH | tR [min] | Area [ $\mu\text{V}\cdot\text{sec}$ ] | Height [ $\mu\text{V}$ ] | Area%  | Height% | Quantity | NTP  | Resolution | Symmetry Factor | Warning |
|---|-----------|----|----------|---------------------------------------|--------------------------|--------|---------|----------|------|------------|-----------------|---------|
| 1 | Unknown   | 11 | 15.053   | 11472480                              | 382009                   | 49.960 | 57.218  | N/A      | 5902 | 4.898      | 1.223           |         |
| 2 | Unknown   | 11 | 19.527   | 11490771                              | 285625                   | 50.040 | 42.782  | N/A      | 5557 | N/A        | 1.418           |         |

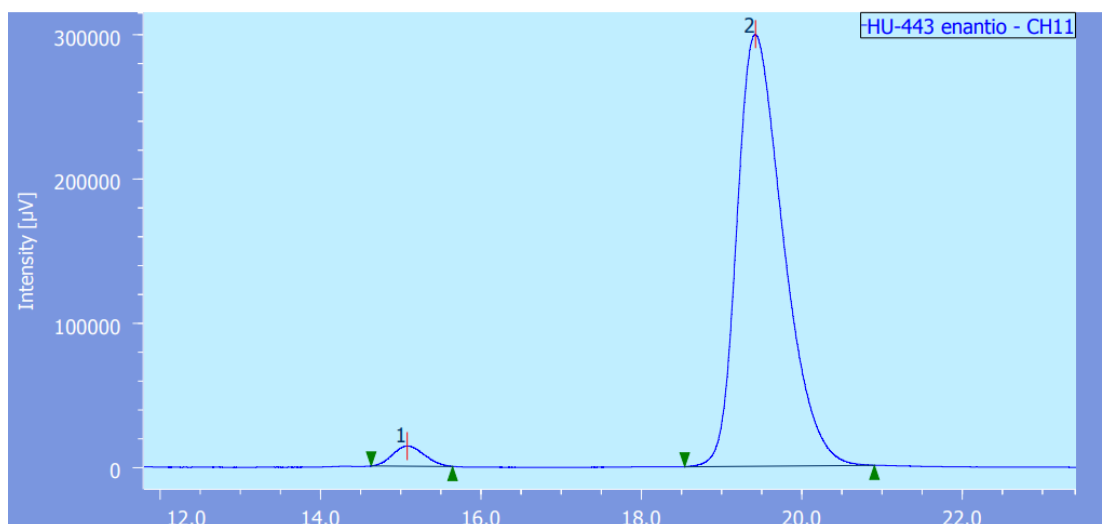

Decision

| # | Peak Name | CH | tR [min] | Area [ $\mu\text{V}\cdot\text{sec}$ ] | Height [ $\mu\text{V}$ ] | Area%  | Height% | Quantity | NTP  | Resolution | Symmetry Factor | Warning |
|---|-----------|----|----------|---------------------------------------|--------------------------|--------|---------|----------|------|------------|-----------------|---------|
| 1 | Unknown   | 11 | 15.080   | 387593                                | 13976                    | 3.134  | 4.463   | N/A      | 6411 | 4.841      | 1.115           |         |
| 2 | Unknown   | 11 | 19.420   | 11981193                              | 299155                   | 96.866 | 95.537  | N/A      | 5531 | N/A        | 1.407           |         |

### *tert*-Butyl (*R*)-2-(4-cyanophenyl)-3-cycloheptylpropanoate (47)

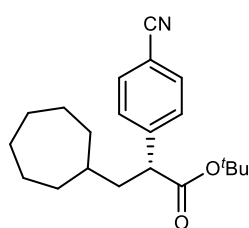

Prepared by GP-A. White solid, 48.3 mg, 74% yield. m.p. = 75-76 °C;  $^1\text{H}$  NMR (400 MHz,  $\text{CDCl}_3$ )  $\delta$  7.63 – 7.56 (m, 2H), 7.44 – 7.38 (m, 2H), 3.59 (t,  $J = 7.8$  Hz, 1H), 1.96 (ddd,  $J = 13.7, 8.2, 7.0$  Hz, 1H), 1.73 – 1.65 (m, 2H), 1.65 – 1.56 (m, 3H), 1.55 – 1.42 (m, 4H), 1.39 (s, 9H), 1.37 – 1.27 (m, 3H), 1.24 – 1.13 (m, 2H);  $^{13}\text{C}$  NMR (101 MHz,  $\text{CDCl}_3$ )  $\delta$  172.4, 145.4, 132.2, 128.8, 118.8, 110.8, 81.2, 50.6, 41.5, 36.8, 34.3, 34.2, 28.44, 28.41,

27.9, 26.2, 26.1. IR (film):  $\nu$  (cm<sup>-1</sup>) 2978, 2916, 2853, 2231, 1720, 1605, 1505, 1462, 1365, 1355, 1343, 1226, 1209, 1160, 1138, 1022, 863, 837, 762, 575, 550, 482; HR-MS (ESI)  $m/z$  calcd for C<sub>21</sub>H<sub>29</sub>NNaO<sub>2</sub><sup>+</sup> [M+Na<sup>+</sup>] 350.20905, found 350.20917; [ $\alpha$ ]<sub>D</sub><sup>24.0</sup> = -19.8 (c = 0.1, CHCl<sub>3</sub>); HPLC conditions: Chiral-NR column, hexane/2-propanol = 98/2, flow rate = 1.0 mL/min,  $\lambda$  = 250 nm,  $t_R$  = 15.1 min (minor),  $t_R$  = 19.1 min (major), 96:4 er.

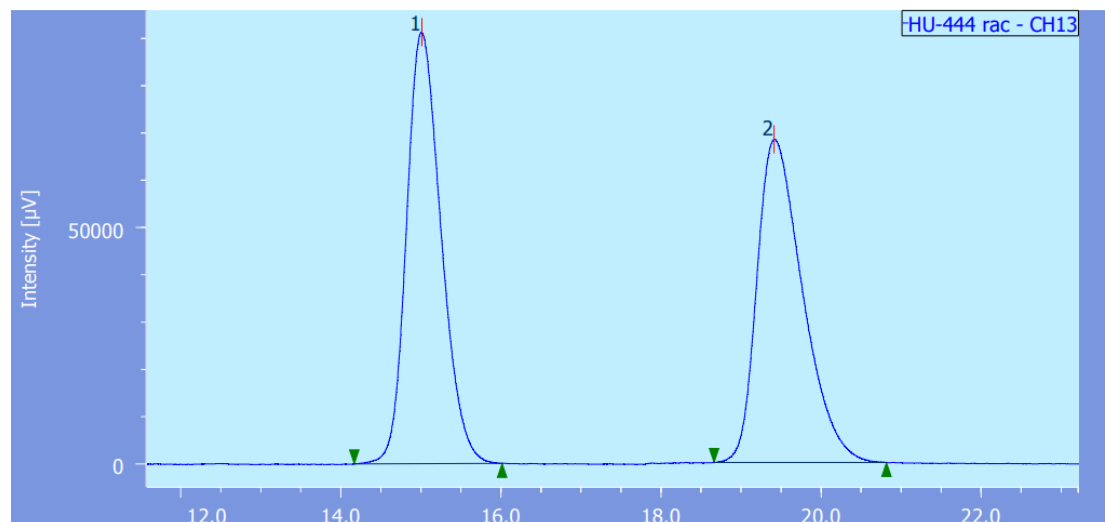

Decision

| # | Peak Name | CH | tR [min] | Area [ $\mu$ V-sec] | Height [ $\mu$ V] | Area%  | Height% | Quantity | NTP  | Resolution | Symmetry Factor | Warning |
|---|-----------|----|----------|---------------------|-------------------|--------|---------|----------|------|------------|-----------------|---------|
| 1 | Unknown   | 13 | 15.010   | 2739027             | 91179             | 50.249 | 57.187  | N/A      | 5856 | 4.843      | 1.217           |         |
| 2 | Unknown   | 13 | 19.410   | 2711880             | 68262             | 49.751 | 42.813  | N/A      | 5602 | N/A        | 1.475           |         |

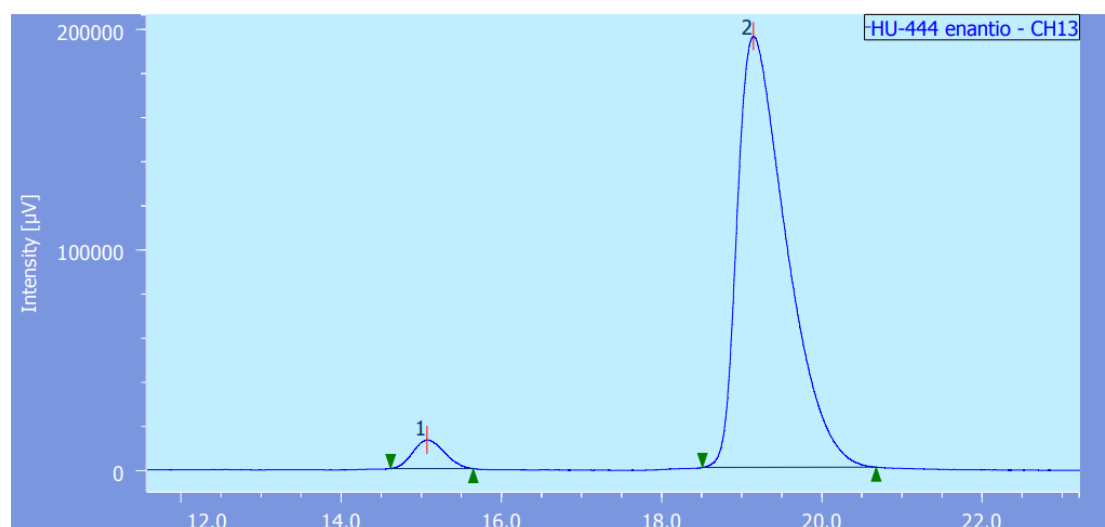

Decision

| # | Peak Name | CH | tR [min] | Area [ $\mu$ V-sec] | Height [ $\mu$ V] | Area%  | Height% | Quantity | NTP  | Resolution | Symmetry Factor | Warning |
|---|-----------|----|----------|---------------------|-------------------|--------|---------|----------|------|------------|-----------------|---------|
| 1 | Unknown   | 13 | 15.070   | 357196              | 12962             | 4.123  | 6.221   | N/A      | 6554 | 4.401      | 1.138           |         |
| 2 | Unknown   | 13 | 19.143   | 8305441             | 195409            | 95.877 | 93.779  | N/A      | 4747 | N/A        | 1.804           |         |

### *tert*-Butyl (*R*)-2-(4-cyanophenyl)-3-cyclooctylpropanoate (48)

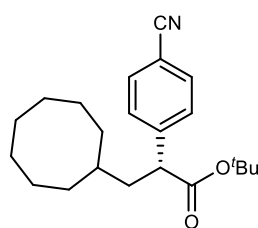

Prepared by GP-A. White solid, 48.5 mg, 71% yield. m.p. = 57-58 °C; <sup>1</sup>H NMR (400 MHz, CDCl<sub>3</sub>)  $\delta$  7.63 – 7.56 (m, 2H), 7.44 – 7.38 (m, 2H), 3.60 (dd,  $J$  = 8.4, 7.1 Hz, 1H), 1.95 (ddd,  $J$  = 13.7, 8.5, 6.6 Hz, 1H), 1.70 – 1.45 (m, 10H), 1.43 – 1.34 (m, 13H), 1.31 – 1.22 (m, 2H); <sup>13</sup>C NMR (101 MHz, CDCl<sub>3</sub>)  $\delta$  172.3, 145.5, 132.2, 128.7, 118.8, 110.8, 81.2, 50.6, 41.6, 34.7, 32.1, 32.0, 27.9, 27.2, 27.1, 26.2, 25.3, 25.2. IR (film):  $\nu$  (cm<sup>-1</sup>) 2974,

2913, 2849, 2231, 1715, 1606, 1506, 1472, 1460, 1446, 1364, 1313, 1226, 1219, 1146, 1027, 840, 757, 568, 546, 484; HR-MS (ESI)  $m/z$  calcd for  $C_{22}H_{31}NaNO_2^+$   $[M+Na^+]$  364.22470, found 364.22423;  $[\alpha]_D^{24.0} = -22.0$  ( $c = 0.1$ ,  $CHCl_3$ ); HPLC conditions: Chiral-NR column, hexane/2-propanol = 98/2, flow rate = 1.0 mL/min,  $\lambda = 240$  nm,  $t_R = 15.0$  min (minor),  $t_R = 19.5$  min (major), 95:5 er.

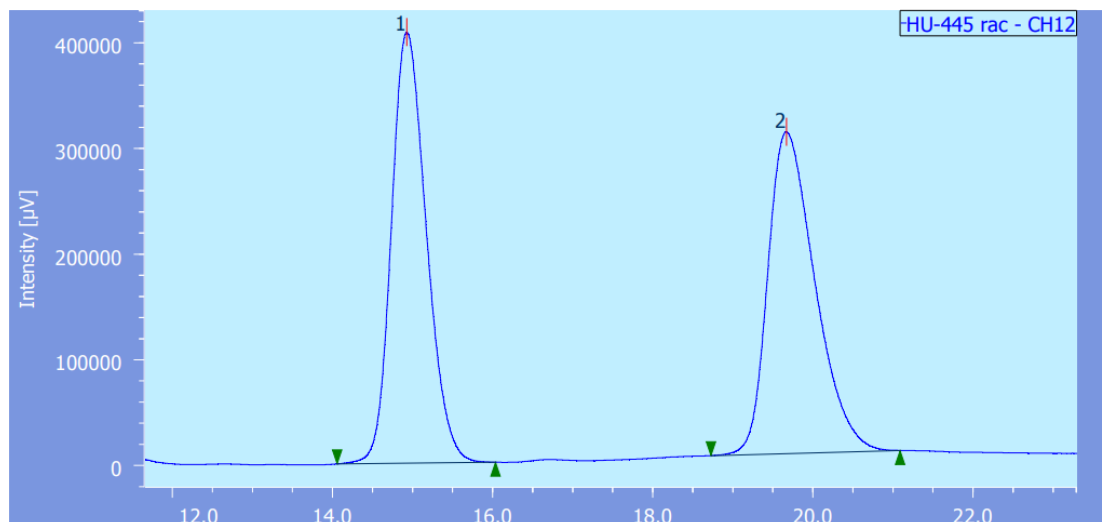

Decision

| # | Peak Name | CH | tR [min] | Area [ $\mu V \cdot sec$ ] | Height [ $\mu V$ ] | Area%  | Height% | Quantity | NTP  | Resolution | Symmetry Factor | Warning |
|---|-----------|----|----------|----------------------------|--------------------|--------|---------|----------|------|------------|-----------------|---------|
| 1 | Unknown   | 12 | 14.927   | 12369931                   | 407684             | 49.849 | 57.259  | N/A      | 5645 | 5.101      | 1.207           |         |
| 2 | Unknown   | 12 | 19.667   | 12444684                   | 304313             | 50.151 | 42.741  | N/A      | 5416 | N/A        | 1.406           |         |

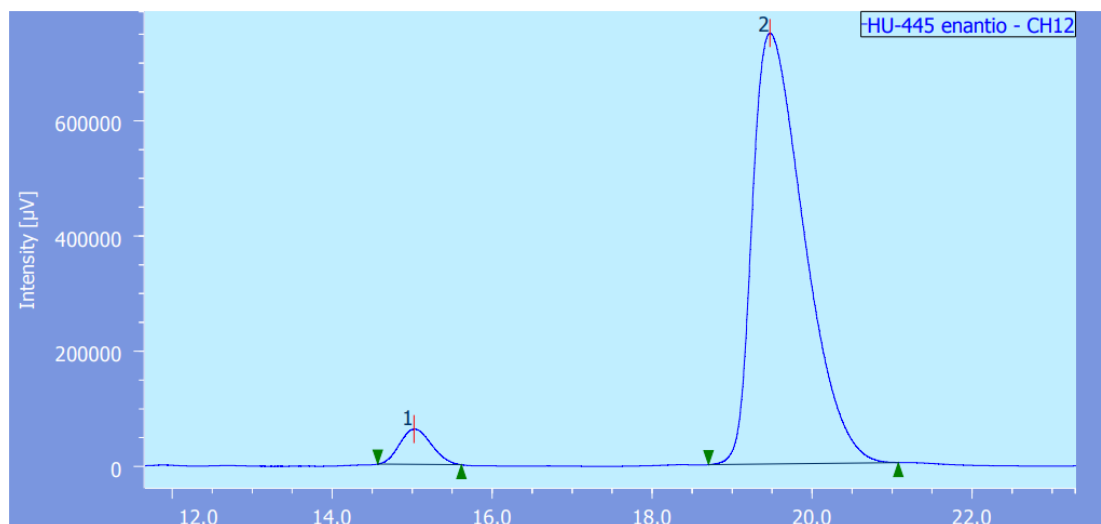

Decision

| # | Peak Name | CH | tR [min] | Area [ $\mu V \cdot sec$ ] | Height [ $\mu V$ ] | Area%  | Height% | Quantity | NTP  | Resolution | Symmetry Factor | Warning |
|---|-----------|----|----------|----------------------------|--------------------|--------|---------|----------|------|------------|-----------------|---------|
| 1 | Unknown   | 12 | 15.023   | 1705864                    | 61447              | 4.848  | 7.598   | N/A      | 6414 | 4.606      | 1.137           |         |
| 2 | Unknown   | 12 | 19.470   | 33478543                   | 747254             | 95.152 | 92.402  | N/A      | 4314 | N/A        | 1.694           |         |

***tert*-Butyl (*R*)-2-(4-cyanophenyl)-3-cyclododecylpropanoate (49)**

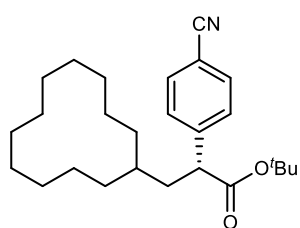

Prepared by **GP-B**. Colorless oil, 52.5 mg, 66% yield.  $^1H$  NMR (400 MHz,  $CDCl_3$ )  $\delta$  7.60 (d,  $J = 8.3$  Hz, 2H), 7.42 (d,  $J = 8.3$  Hz, 2H), 3.61 (t,  $J = 7.8$  Hz, 1H), 1.96 (ddd,  $J = 13.7, 8.3, 5.7$  Hz, 1H), 1.62 – 1.53 (m, 1H), 1.39 (s, 9H), 1.35 – 1.15 (m, 23H);  $^{13}C$  NMR (101 MHz,  $CDCl_3$ )  $\delta$  172.3, 145.5, 132.2, 128.8, 118.8, 110.8, 81.2, 50.6, 38.8, 31.5, 29.1, 29.0, 27.9, 24.6, 24.4, 23.8, 23.3, 23.23, 23.21, 21.6, 21.5.

IR (film):  $\nu$  (cm<sup>-1</sup>) 2930, 2860, 2360, 2340, 2228, 2176, 2159, 2033, 2025, 2016, 1976, 1727, 1607, 1505, 1470, 1455, 1446, 1367, 1252, 1143, 842, 733; HR-MS (ESI)  $m/z$  calcd for C<sub>26</sub>H<sub>39</sub>NaNO<sub>2</sub><sup>+</sup> [M+Na<sup>+</sup>] 420.28730, found 420.28719; [ $\alpha$ ]<sub>D</sub><sup>23.2</sup> = -14.1 (c = 0.1, CHCl<sub>3</sub>); HPLC conditions: Chiral-NR column, hexane/2-propanol = 98/2, flow rate = 1.0 mL/min,  $\lambda$  = 230 nm,  $t_R$  = 14.8 min (minor),  $t_R$  = 18.9 min (major), 96:4 er.

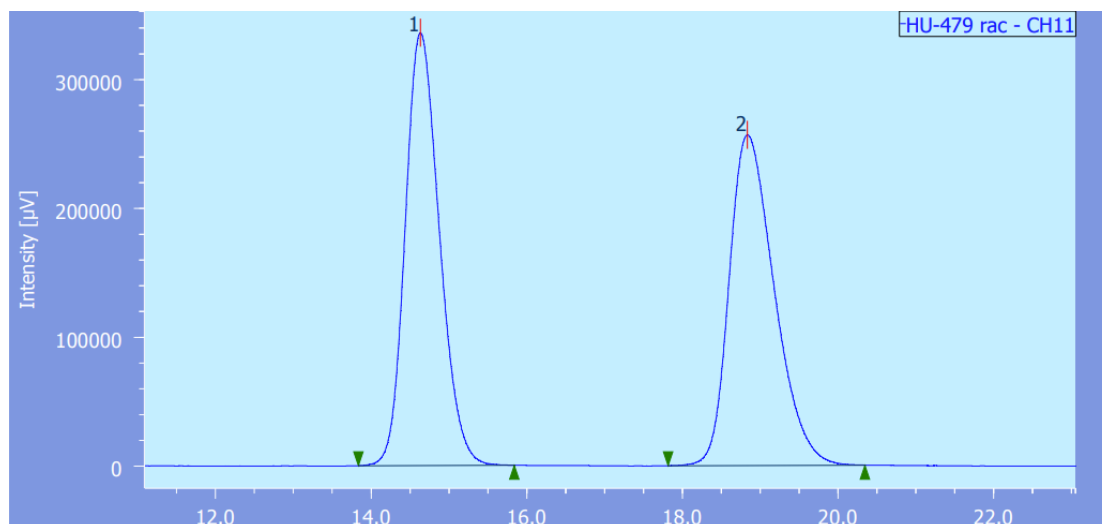

Decision

| # | Peak Name | CH | tR [min] | Area [µV·sec] | Height [µV] | Area%  | Height% | Quantity | NTP  | Resolution | Symmetry Factor | Warning |
|---|-----------|----|----------|---------------|-------------|--------|---------|----------|------|------------|-----------------|---------|
| 1 | Unknown   | 11 | 14.633   | 10246878      | 335665      | 49.807 | 56.686  | N/A      | 5343 | 4.540      | 1.192           |         |
| 2 | Unknown   | 11 | 18.833   | 10326471      | 256485      | 50.193 | 43.314  | N/A      | 5104 | N/A        | 1.348           |         |

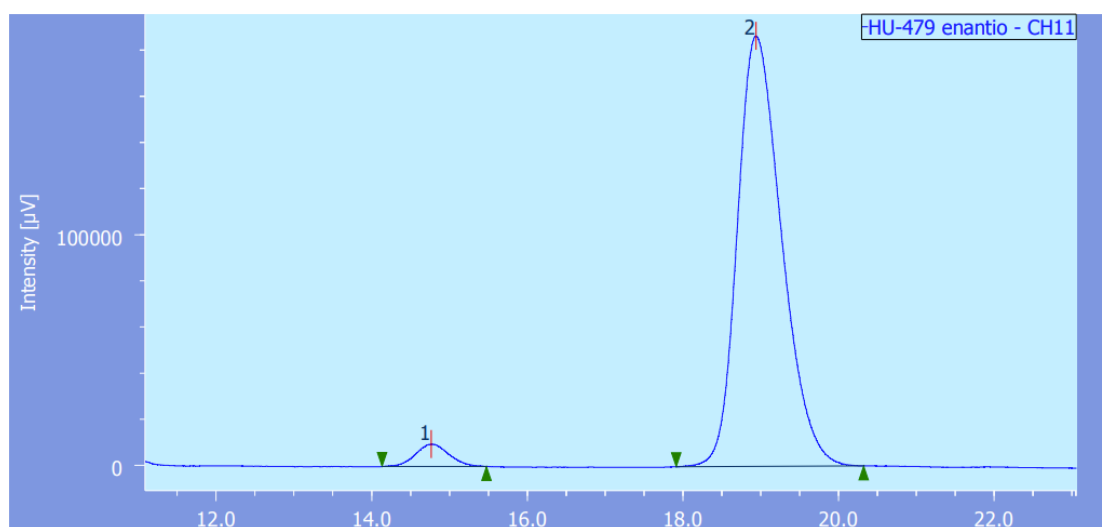

Decision

| # | Peak Name | CH | tR [min] | Area [µV·sec] | Height [µV] | Area%  | Height% | Quantity | NTP  | Resolution | Symmetry Factor | Warning |
|---|-----------|----|----------|---------------|-------------|--------|---------|----------|------|------------|-----------------|---------|
| 1 | Unknown   | 11 | 14.763   | 292048        | 9685        | 3.817  | 4.937   | N/A      | 5605 | 4.594      | 1.081           |         |
| 2 | Unknown   | 11 | 18.937   | 7359539       | 186484      | 96.183 | 95.063  | N/A      | 5377 | N/A        | 1.283           |         |

***tert*-Butyl (*R*)-2-(4-cyanophenyl)-4,4,5-trimethylhexanoate (50)**

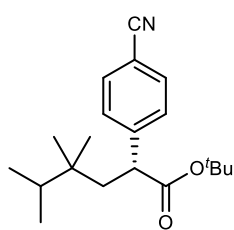

Prepared by **GP-A**. White solid, 32.0 mg, 51% yield. m.p. = 70-71 °C; <sup>1</sup>H NMR (400 MHz, CDCl<sub>3</sub>)  $\delta$  7.61 – 7.56 (m, 2H), 7.45 – 7.38 (m, 2H), 3.57 (dd,  $J$  = 8.9, 3.5 Hz, 1H), 2.27 (dd,  $J$  = 14.1, 8.9 Hz, 1H), 1.54 – 1.44 (m, 2H), 1.36 (s, 9H), 0.87 – 0.76 (m, 12H); <sup>13</sup>C NMR (101 MHz, CDCl<sub>3</sub>)  $\delta$  172.8, 147.2, 132.3, 128.5, 118.8, 110.7, 81.1, 48.8, 43.1, 36.0, 35.9, 27.8, 24.3, 23.7, 17.41, 17.38. IR (film):  $\nu$  (cm<sup>-1</sup>) 2966, 2931, 2870, 2226, 1722,

1602, 1468, 1455, 1390, 1364, 1329, 1270, 1243, 1214, 1144, 1115, 875, 842, 827, 756, 573, 547; HR-MS (ESI)  $m/z$  calcd for  $C_{20}H_{29}NNaO_2^+$  [ $M+Na^+$ ] 338.20905, found 338.20856;  $[\alpha]_D^{24.1} = -23.0$  ( $c = 0.1$ ,  $CHCl_3$ ); HPLC conditions: Chiral-NR column, hexane/2-propanol = 98/2, flow rate = 1.0 mL/min,  $\lambda = 230$  nm,  $t_R = 11.0$  min (minor),  $t_R = 13.9$  min (major), 97:3 er.

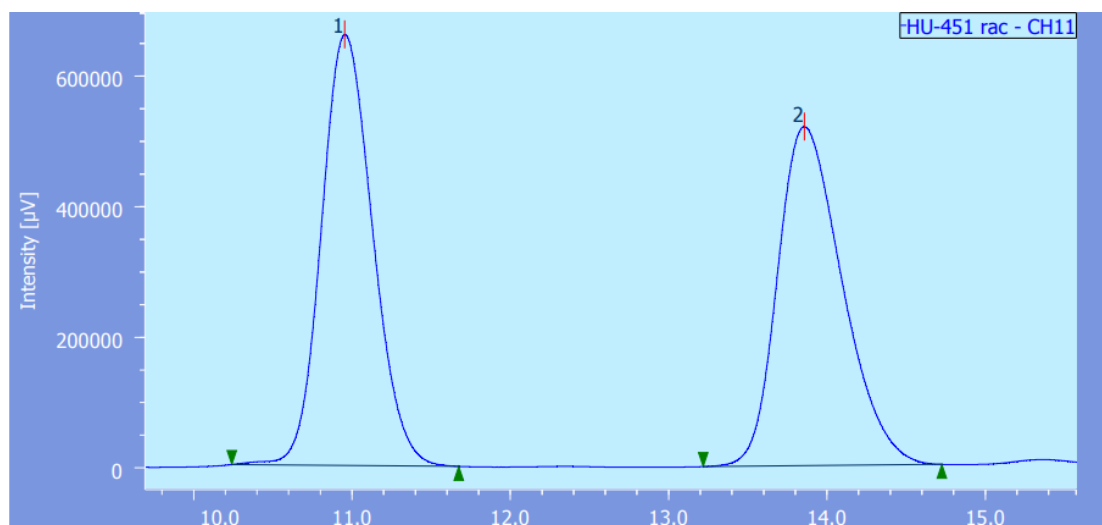

Decision

| # | Peak Name | CH | tR [min] | Area [ $\mu V \cdot sec$ ] | Height [ $\mu V$ ] | Area%  | Height% | Quantity | NTP  | Resolution | Symmetry Factor | Warning |
|---|-----------|----|----------|----------------------------|--------------------|--------|---------|----------|------|------------|-----------------|---------|
| 1 | Unknown   | 11 | 10.953   | 14859792                   | 659434             | 50.205 | 55.973  | N/A      | 5485 | 4.343      | 1.144           |         |
| 2 | Unknown   | 11 | 13.857   | 14738160                   | 518699             | 49.795 | 44.027  | N/A      | 5477 | N/A        | 1.308           |         |

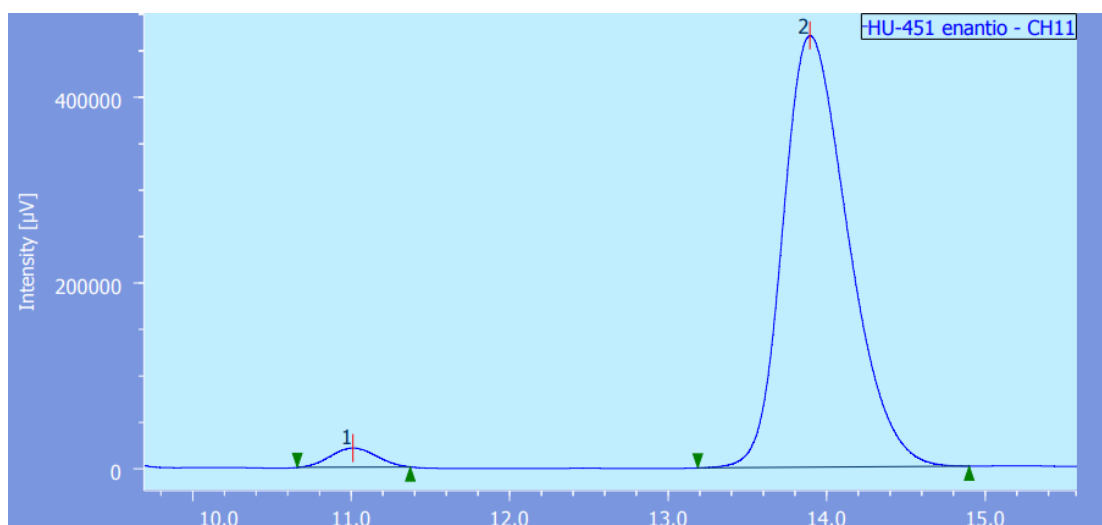

Decision

| # | Peak Name | CH | tR [min] | Area [ $\mu V \cdot sec$ ] | Height [ $\mu V$ ] | Area%  | Height% | Quantity | NTP  | Resolution | Symmetry Factor | Warning |
|---|-----------|----|----------|----------------------------|--------------------|--------|---------|----------|------|------------|-----------------|---------|
| 1 | Unknown   | 11 | 11.010   | 421295                     | 20738              | 3.072  | 4.273   | N/A      | 6299 | 4.429      | 1.035           |         |
| 2 | Unknown   | 11 | 13.893   | 13292272                   | 464614             | 96.928 | 95.727  | N/A      | 5483 | N/A        | 1.306           |         |

#### *tert*-Butyl (*R*)-6-chloro-2-(4-cyanophenyl)-4,4-dimethylhexanoate (**51**)

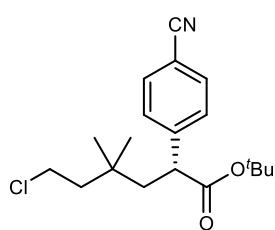

Prepared by GP-A. White solid, 39.1 mg, 58% yield. m.p. = 45-46 °C;  $^1H$  NMR (400 MHz,  $CDCl_3$ )  $\delta$  7.62 – 7.56 (m, 2H), 7.44 – 7.37 (m, 2H), 3.56 (dd,  $J = 9.1, 3.4$  Hz, 1H), 3.54 – 3.40 (m, 2H), 2.30 (dd,  $J = 14.2, 9.1$  Hz, 1H), 1.81 – 1.68 (m, 2H), 1.47 (dd,  $J = 14.2, 3.4$  Hz, 1H), 1.36 (s, 9H), 0.91 (s, 6H);  $^{13}C$  NMR (101 MHz,  $CDCl_3$ )  $\delta$  172.3, 146.4, 132.4, 128.4, 118.7, 111.0, 81.5, 48.8, 45.0, 44.9, 40.7, 34.0, 27.7, 27.0, 26.7.

IR (film):  $\nu$  ( $cm^{-1}$ ) 2978, 2955, 2924, 2874, 2229, 1726, 1604, 1501, 1470, 1456, 1392, 1367, 1340,

1254, 1211, 1143, 1021, 869, 839, 783, 729, 718, 567, 550; HR-MS (ESI)  $m/z$  calcd for  $C_{19}H_{26}CINNaO_2^+$  [ $M+Na^+$ ] 358.15443, found 358.15388;  $[\alpha]_D^{24.1} = -28.2$  ( $c = 0.1$ ,  $CHCl_3$ ); HPLC conditions: Chiral-NR column, hexane/2-propanol = 98/2, flow rate = 1.0 mL/min,  $\lambda = 250$  nm,  $t_R = 16.6$  min (minor),  $t_R = 19.5$  min (major), 95:5 er.

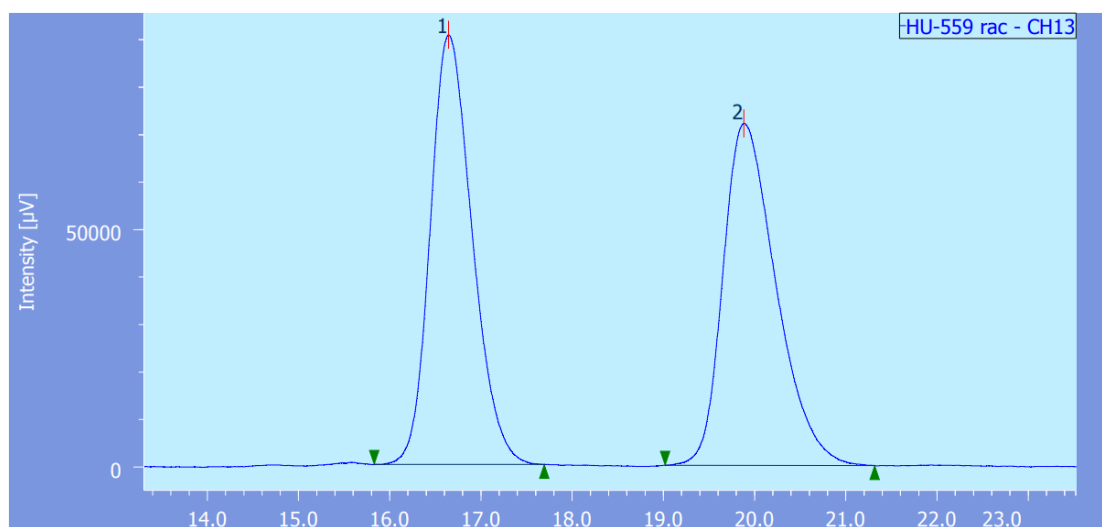

Decision

| # | Peak Name | CH | tR [min] | Area [µV·sec] | Height [µV] | Area%  | Height% | Quantity | NTP  | Resolution | Symmetry Factor | Warning |
|---|-----------|----|----------|---------------|-------------|--------|---------|----------|------|------------|-----------------|---------|
| 1 | Unknown   | 13 | 16.643   | 2897603       | 90462       | 49.864 | 55.674  | N/A      | 6314 | 3.434      | 1.214           |         |
| 2 | Unknown   | 13 | 19.880   | 2913450       | 72024       | 50.136 | 44.326  | N/A      | 5710 | N/A        | 1.395           |         |

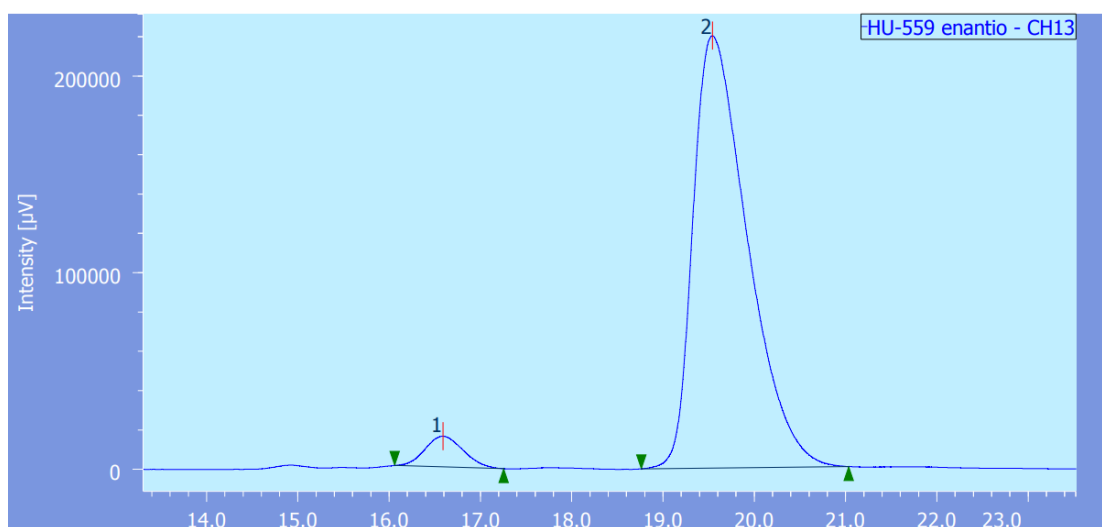

Decision

| # | Peak Name | CH | tR [min] | Area [µV·sec] | Height [µV] | Area%  | Height% | Quantity | NTP  | Resolution | Symmetry Factor | Warning |
|---|-----------|----|----------|---------------|-------------|--------|---------|----------|------|------------|-----------------|---------|
| 1 | Unknown   | 13 | 16.590   | 454858        | 15582       | 4.757  | 6.621   | N/A      | 7207 | 3.168      | 1.096           |         |
| 2 | Unknown   | 13 | 19.540   | 9107504       | 219747      | 95.243 | 93.379  | N/A      | 5182 | N/A        | 1.616           |         |

***tert*-Butyl (*R*)-6-bromo-2-(4-cyanophenyl)-4,4-dimethylhexanoate (**52**)**

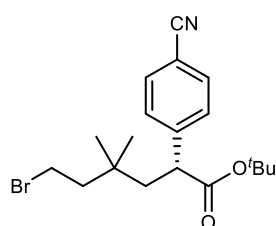

Prepared by **GP-B**. White solid, 35.9 mg, 47% yield. m.p. = 67–68 °C;  $^1H$  NMR (400 MHz,  $CDCl_3$ )  $\delta$  7.64 – 7.57 (m, 2H), 7.44 – 7.37 (m, 2H), 3.56 (dd,  $J = 9.0, 3.5$  Hz, 1H), 3.34 (dddd,  $J = 15.4, 10.4, 9.5, 6.5$  Hz, 2H), 2.30 (dd,  $J = 14.2, 9.0$  Hz, 1H), 1.92 – 1.77 (m, 2H), 1.46 (dd,  $J = 10.9, 3.5$  Hz, 1H), 1.37 (s, 9H), 0.91 (s, 6H);  $^{13}C$  NMR (101 MHz,  $CDCl_3$ )  $\delta$  172.3, 146.4, 132.4, 128.4, 118.7, 111.0, 81.5, 48.8, 45.5, 44.8, 35.0, 28.6, 27.8, 26.8, 26.6. IR (film):  $\nu$  ( $cm^{-1}$ ) 2978, 2955, 2928, 2872, 2230, 1725, 1605, 1501, 1467,

1391, 1366, 1271, 1229, 1144, 1021, 871, 840, 772, 652, 568; HR-MS (ESI)  $m/z$  calcd for  $C_{19}H_{26}BrNNaO_2^+$  [ $M+Na^+$ ] 402.10391, found 402.10400;  $[\alpha]_D^{24.2} = -29.6$  ( $c = 0.1$ ,  $CHCl_3$ ); HPLC conditions: Chiral-NR column, hexane/2-propanol = 98/2, flow rate = 1.0 mL/min,  $\lambda = 250$  nm,  $t_R = 17.2$  min (minor),  $t_R = 20.5$  min (major), 94:6 er.

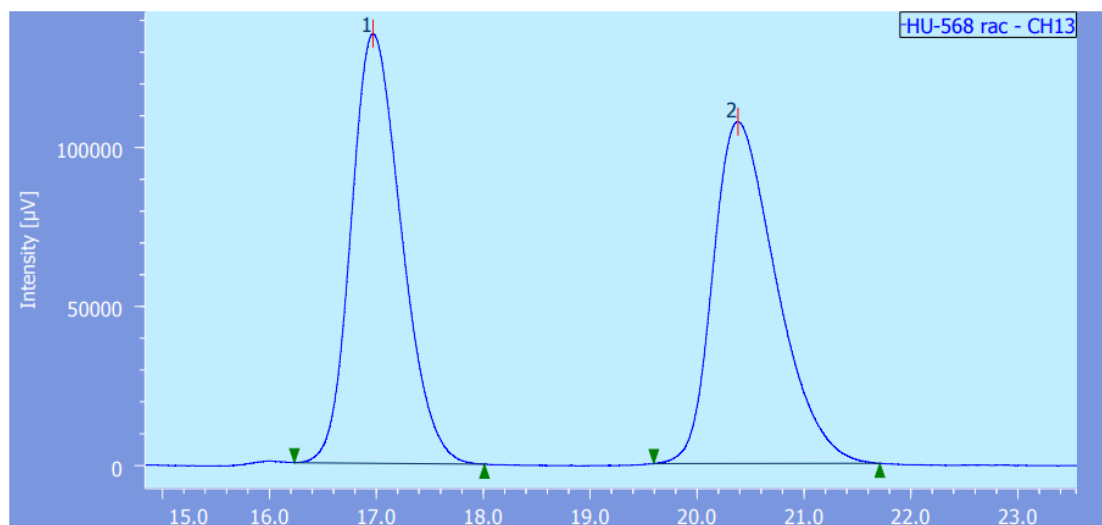

Decision

| # | Peak Name | CH | tR [min] | Area [ $\mu V \cdot sec$ ] | Height [ $\mu V$ ] | Area%  | Height% | Quantity | NTP  | Resolution | Symmetry Factor | Warning |
|---|-----------|----|----------|----------------------------|--------------------|--------|---------|----------|------|------------|-----------------|---------|
| 1 | Unknown   | 13 | 16.970   | 4422487                    | 135027             | 49.918 | 55.675  | N/A      | 6210 | 3.521      | 1.214           |         |
| 2 | Unknown   | 13 | 20.380   | 4437034                    | 107500             | 50.082 | 44.325  | N/A      | 5692 | N/A        | 1.416           |         |

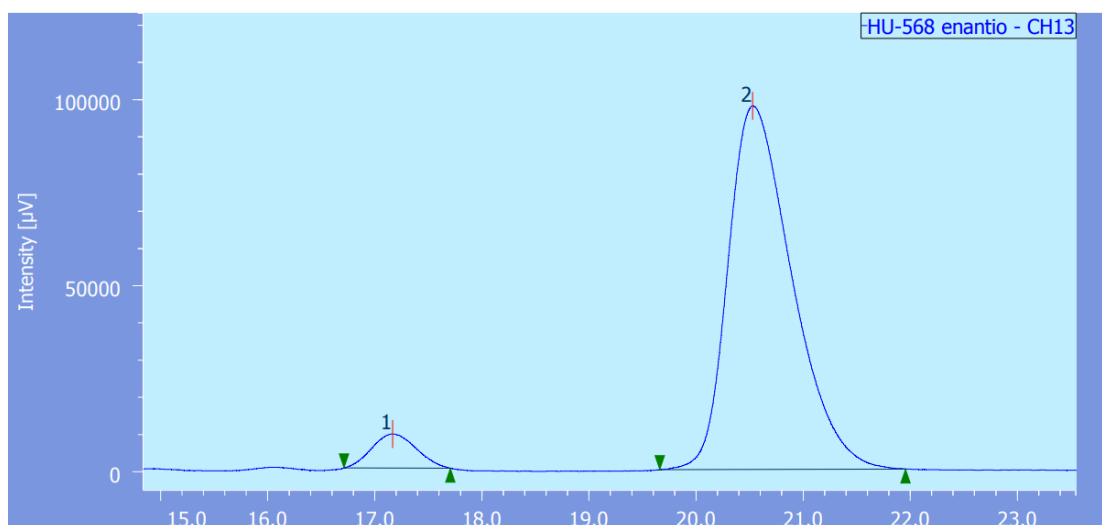

Decision

| # | Peak Name | CH | tR [min] | Area [ $\mu V \cdot sec$ ] | Height [ $\mu V$ ] | Area%  | Height% | Quantity | NTP  | Resolution | Symmetry Factor | Warning |
|---|-----------|----|----------|----------------------------|--------------------|--------|---------|----------|------|------------|-----------------|---------|
| 1 | Unknown   | 13 | 17.167   | 265401                     | 9181               | 6.152  | 8.592   | N/A      | 7495 | 3.594      | 1.086           |         |
| 2 | Unknown   | 13 | 20.527   | 4048602                    | 97681              | 93.848 | 91.408  | N/A      | 5760 | N/A        | 1.426           |         |

### *tert*-Butyl (*R*)-6-cyano-2-(4-cyanophenyl)-4,4-dimethylhexanoate (**53**)

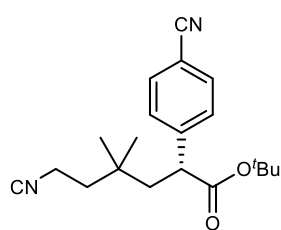

Prepared by GP-A. Colorless oil, 54.2 mg, 83% yield.  $^1H$  NMR (400 MHz,  $CDCl_3$ )  $\delta$  7.62 – 7.57 (m, 2H), 7.41 – 7.37 (m, 2H), 3.54 (dd,  $J = 9.3, 3.3$  Hz, 1H), 2.37 – 2.18 (m, 3H), 1.68 – 1.57 (m, 2H), 1.51 – 1.46 (m, 1H), 1.36 (s, 9H), 0.92 (s, 3H), 0.90 (s, 3H);  $^{13}C$  NMR (101 MHz,  $CDCl_3$ )  $\delta$  172.2, 146.1, 132.5, 128.3, 120.1, 118.6, 111.0, 81.7, 48.6, 44.2, 37.3, 33.5, 27.7, 26.4, 26.1, 12.3. IR (film):  $\nu$  ( $cm^{-1}$ ) 2968, 2934, 2874, 2245, 2227, 1724, 1606, 1504, 1474, 1456, 1392, 1368, 1276, 1249, 1216, 1144, 1020, 840,

755, 564; HR-MS (ESI)  $m/z$  calcd for  $C_{19}H_{26}N_2NaO_2^+$   $[M+Na^+]$  349.18865, found 349.18860;  $[\alpha]_D^{24.1} = -28.5$  ( $c = 0.1$ ,  $CHCl_3$ ); HPLC conditions: Chiral-NR column, hexane/2-propanol = 90/10, flow rate = 1.0 mL/min,  $\lambda = 230$  nm,  $t_R = 43.4$  min (minor),  $t_R = 46.6$  min (major), 95:5 er.

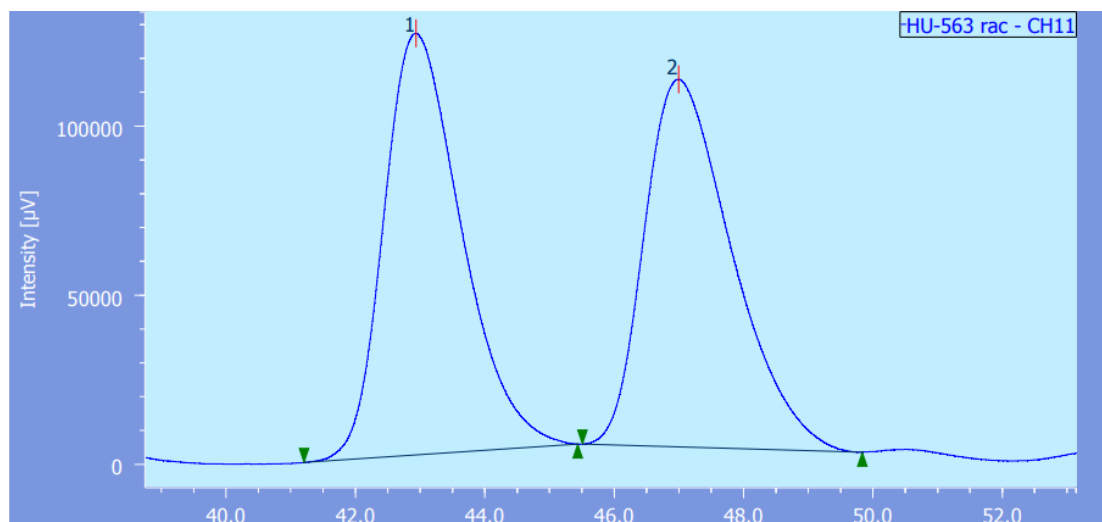

Decision

| # | Peak Name | CH | tR [min] | Area [ $\mu V \cdot sec$ ] | Height [ $\mu V$ ] | Area%  | Height% | Quantity | NTP  | Resolution | Symmetry Factor | Warning |
|---|-----------|----|----------|----------------------------|--------------------|--------|---------|----------|------|------------|-----------------|---------|
| 1 | Unknown   | 11 | 42.937   | 10400341                   | 124531             | 50.412 | 53.421  | N/A      | 6184 | 1.740      | 1.338           |         |
| 2 | Unknown   | 11 | 46.993   | 10230165                   | 108581             | 49.588 | 46.579  | N/A      | 5695 | N/A        | 1.437           |         |

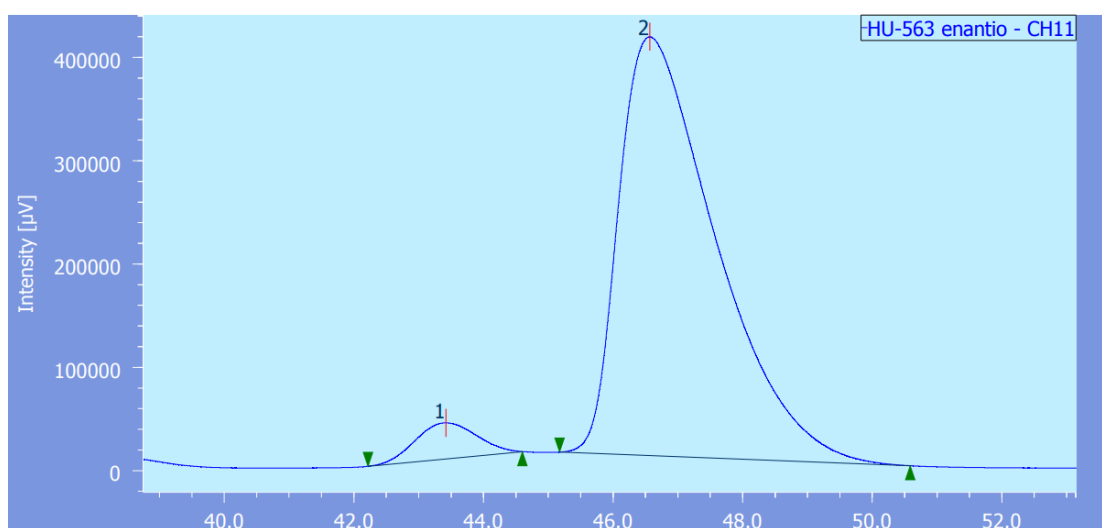

Decision

| # | Peak Name | CH | tR [min] | Area [ $\mu V \cdot sec$ ] | Height [ $\mu V$ ] | Area%  | Height% | Quantity | NTP  | Resolution | Symmetry Factor | Warning |
|---|-----------|----|----------|----------------------------|--------------------|--------|---------|----------|------|------------|-----------------|---------|
| 1 | Unknown   | 11 | 43.420   | 2300190                    | 34863              | 5.167  | 7.921   | N/A      | 9247 | 1.393      | 1.040           |         |
| 2 | Unknown   | 11 | 46.567   | 42219990                   | 405286             | 94.833 | 92.079  | N/A      | 4681 | N/A        | 1.885           |         |

#### *tert*-Butyl (*R*)-2-(4-cyanophenyl)-4,4-dimethyl-7-oxooctanoate (**54**)

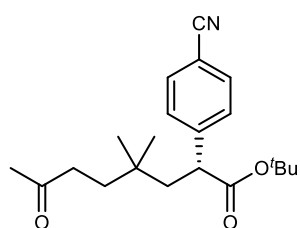

Prepared by **GP-A**. White solid, 52.5 mg, 76% yield. m.p. = 155-156 °C;  $^1H$  NMR (400 MHz,  $CDCl_3$ )  $\delta$  7.60 – 7.55 (m, 2H), 7.41 – 7.36 (m, 2H), 3.55 (dd,  $J = 9.0, 3.4$  Hz, 1H), 2.46 – 2.21 (m, 3H), 2.11 (s, 3H), 1.53 – 1.44 (m, 3H), 1.34 (s, 9H), 0.87 – 0.83 (m, 6H);  $^{13}C$  NMR (101 MHz,  $CDCl_3$ )  $\delta$  208.8, 172.5, 146.7, 132.4, 128.4, 118.7, 110.8, 81.3, 48.8, 44.7, 38.6, 35.1, 33.0, 30.0, 27.7, 26.9, 26.6. IR (film):  $\nu$  ( $cm^{-1}$ ) 2961, 2935, 2871, 2228, 1717, 1605, 1502, 1471, 1391, 1368, 1276, 1256, 1143, 1020, 841, 786, 757, 563; HR-MS (ESI)  $m/z$  calcd for  $C_{21}H_{29}NNaO_3^+$   $[M+Na^+]$  366.20396, found 366.20395;



$[\alpha]_D^{24.1} = -25.2$  ( $c = 0.1$ ,  $\text{CHCl}_3$ ); HPLC conditions: Chiral-NR column, hexane/2-propanol = 90/10, flow rate = 0.5 mL/min,  $\lambda = 250$  nm,  $t_R = 63.9$  min (minor),  $t_R = 71.4$  min (major), 95:5 er.

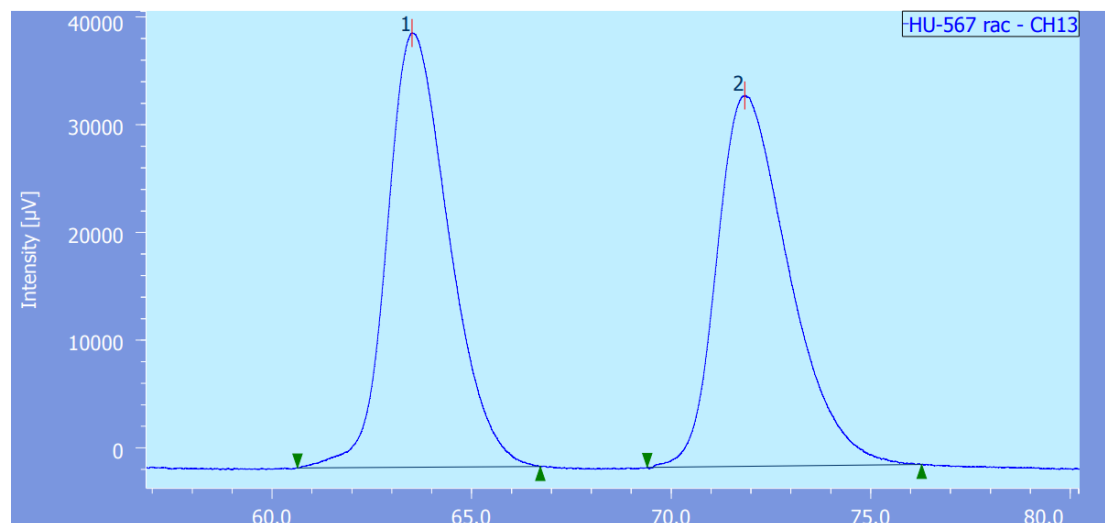

Decision

| # | Peak Name | CH | tR [min] | Area [ $\mu\text{V}\cdot\text{sec}$ ] | Height [ $\mu\text{V}$ ] | Area%  | Height% | Quantity | NTP  | Resolution | Symmetry Factor | Warning |
|---|-----------|----|----------|---------------------------------------|--------------------------|--------|---------|----------|------|------------|-----------------|---------|
| 1 | Unknown   | 13 | 63.503   | 4361739                               | 40299                    | 50.136 | 53.933  | N/A      | 8277 | 2.761      | 1.256           |         |
| 2 | Unknown   | 13 | 71.840   | 4338041                               | 34421                    | 49.864 | 46.067  | N/A      | 7757 | N/A        | 1.432           |         |

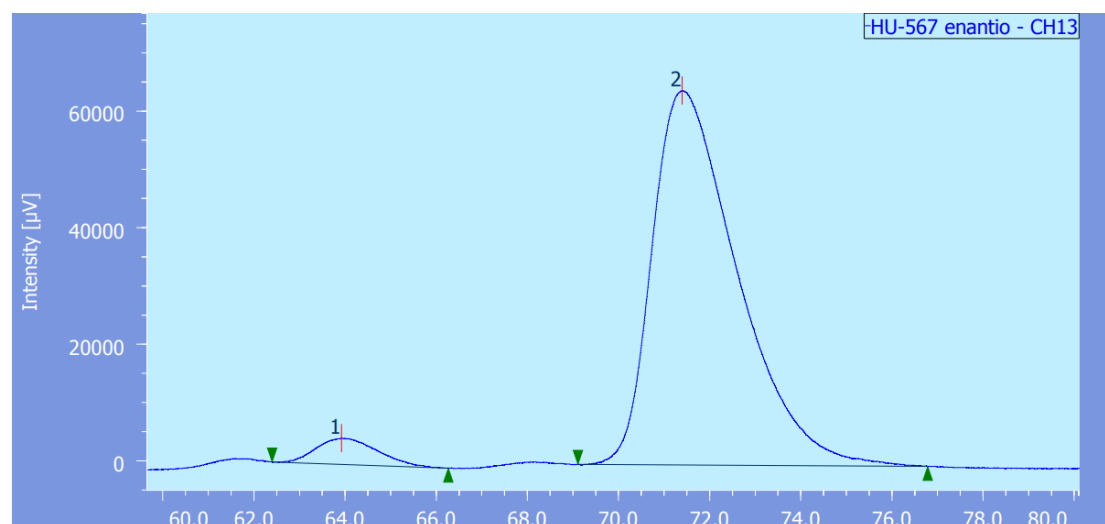

Decision

| # | Peak Name | CH | tR [min] | Area [ $\mu\text{V}\cdot\text{sec}$ ] | Height [ $\mu\text{V}$ ] | Area%  | Height% | Quantity | NTP   | Resolution | Symmetry Factor | Warning |
|---|-----------|----|----------|---------------------------------------|--------------------------|--------|---------|----------|-------|------------|-----------------|---------|
| 1 | Unknown   | 13 | 63.920   | 420305                                | 4479                     | 4.798  | 6.521   | N/A      | 10115 | 2.540      | 1.282           |         |
| 2 | Unknown   | 13 | 71.393   | 8338994                               | 64208                    | 95.202 | 93.479  | N/A      | 7230  | N/A        | 1.626           |         |

### 1-(*tert*-Butyl) 7-methyl (*R*)-2-(4-cyanophenyl)-4,4-dimethylheptanedioate (55)

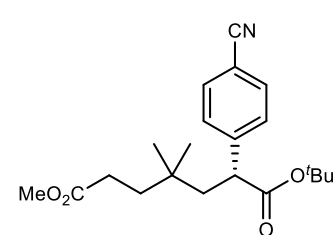

Prepared by **GP-B**. Colorless oil, 34.0 mg, 47% yield.  $^1\text{H}$  NMR (400 MHz,  $\text{CDCl}_3$ )  $\delta$  7.60 – 7.56 (m, 2H), 7.42 – 7.38 (m, 2H), 3.64 (s, 3H), 3.57 (dd,  $J = 9.0, 3.5$  Hz, 1H), 2.32 – 2.15 (m, 3H), 1.60 – 1.54 (m, 2H), 1.48 – 1.44 (m, 1H), 1.35 (s, 9H), 0.88 – 0.83 (m, 6H);  $^{13}\text{C}$  NMR (101 MHz,  $\text{CDCl}_3$ )  $\delta$  174.4, 172.4, 146.6, 132.4, 128.5, 118.7, 110.8, 81.3, 51.6, 48.8, 44.7, 36.5, 33.2, 29.2, 27.7, 26.7, 26.5. IR (film):  $\nu$  ( $\text{cm}^{-1}$ ) 2957, 2935, 2871, 2229, 1727, 1606, 1504, 1473, 1456, 1436, 1392, 1368, 1255, 1198, 1143, 1020, 984, 963, 841, 784, 757, 699, 564; HR-MS (ESI)  $m/z$  calcd for  $\text{C}_{21}\text{H}_{29}\text{NNaO}_4^+$  [ $\text{M}+\text{Na}^+$ ] 382.19888, found 382.19871;  $[\alpha]_D^{23.8} = -12.5$  ( $c = 0.1$ ,  $\text{CHCl}_3$ ); HPLC conditions: Chiral-

NR column, hexane/2-propanol = 95/5, flow rate = 1.0 mL/min,  $\lambda$  = 246 nm,  $t_R$  = 28.1 min (minor),  $t_R$  = 32.4 min (major), 97:3 er.

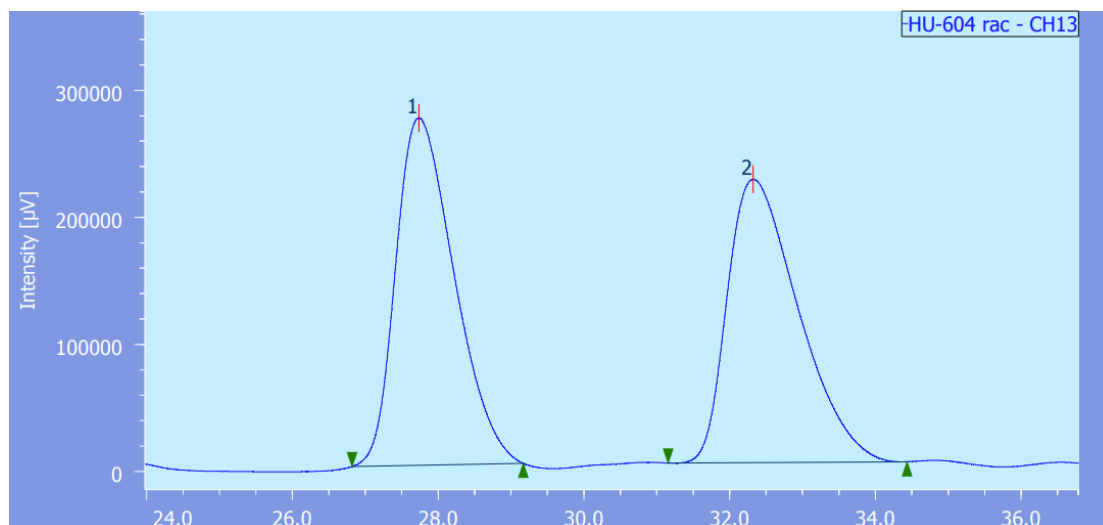

Decision

| # | Peak Name | CH | tR [min] | Area [µV-sec] | Height [µV] | Area%  | Height% | Quantity | NTP  | Resolution | Symmetry Factor | Warning |
|---|-----------|----|----------|---------------|-------------|--------|---------|----------|------|------------|-----------------|---------|
| 1 | Unknown   | 13 | 27.733   | 15240129      | 273387      | 50.227 | 55.066  | N/A      | 5558 | 2.791      | 1.378           |         |
| 2 | Unknown   | 13 | 32.320   | 15102400      | 223083      | 49.773 | 44.934  | N/A      | 5118 | N/A        | 1.558           |         |

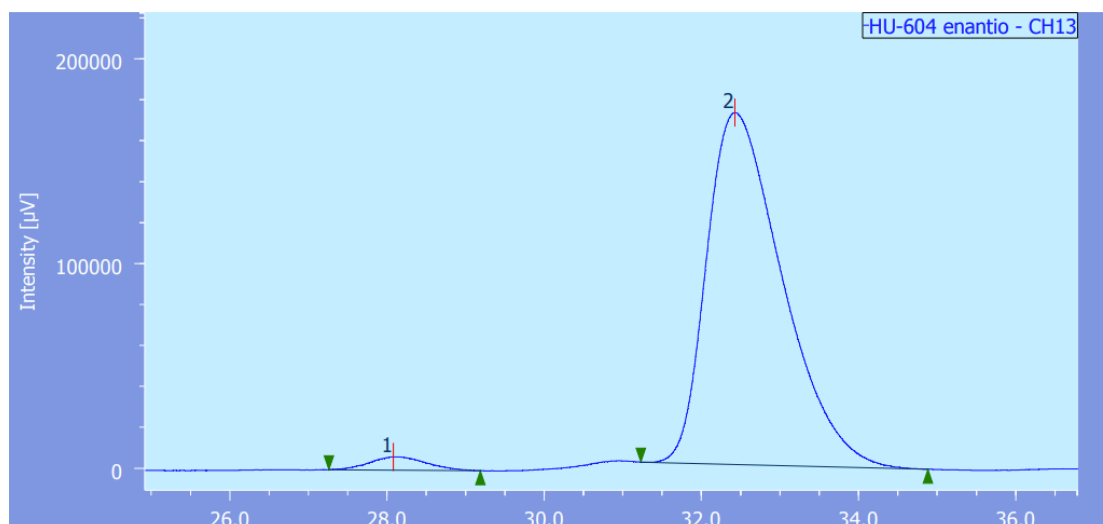

Decision

| # | Peak Name | CH | tR [min] | Area [µV-sec] | Height [µV] | Area%  | Height% | Quantity | NTP  | Resolution | Symmetry Factor | Warning |
|---|-----------|----|----------|---------------|-------------|--------|---------|----------|------|------------|-----------------|---------|
| 1 | Unknown   | 13 | 28.080   | 325391        | 6444        | 2.746  | 3.616   | N/A      | 6841 | 2.787      | 1.149           |         |
| 2 | Unknown   | 13 | 32.423   | 11524922      | 171783      | 97.254 | 96.384  | N/A      | 5384 | N/A        | 1.524           |         |

***tert*-Butyl (*R*)-2-(4-cyanophenyl)-5-hydroxy-4,4,5-trimethylhexanoate (**56**)**

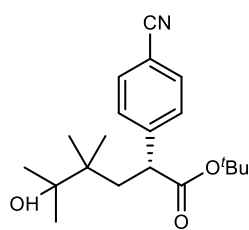

Prepared by **GP-A**. White solid, 53.8 mg, 81% yield. m.p. = 99-100 °C;  $^1\text{H}$  NMR (400 MHz,  $\text{CDCl}_3$ )  $\delta$  7.61 – 7.56 (m, 2H), 7.44 – 7.38 (m, 2H), 3.69 (dd,  $J$  = 9.2, 3.2 Hz, 1H), 2.48 (dd,  $J$  = 14.1, 9.2 Hz, 1H), 1.56 (dd,  $J$  = 14.1, 3.2 Hz, 1H), 1.36 (s, 9H), 1.21 (s, 3H), 1.18 (s, 3H), 0.91 (s, 3H), 0.90 (s, 3H);  $^{13}\text{C}$  NMR (101 MHz,  $\text{CDCl}_3$ )  $\delta$  172.8, 147.2, 132.4, 128.5, 118.8, 110.7, 81.1, 75.4, 49.4, 40.5, 40.4, 27.8, 25.5, 22.2, 21.4. IR (film):  $\nu$  ( $\text{cm}^{-1}$ ) 3533, 2980, 2955, 2929, 2857, 2237, 1726, 1605, 1502, 1463, 1377, 1366, 1347, 1274, 1214, 1174, 1144, 1114, 1103, 946, 879, 835, 756, 573, 556, 477; HR-MS (ESI)  $m/z$  calcd for  $\text{C}_{20}\text{H}_{29}\text{NNaO}_3^+$  [ $\text{M}+\text{H}^+$ ] 354.20396, found 354.20409;  $[\alpha]_D^{24.1}$  = -23.1 ( $c$  = 0.1,  $\text{CHCl}_3$ ); HPLC

conditions: IC column, hexane/2-propanol = 90/10, flow rate = 1.0 mL/min,  $\lambda = 250$  nm,  $t_R = 11.8$  min (major),  $t_R = 14.1$  min (minor), 96:4 er.

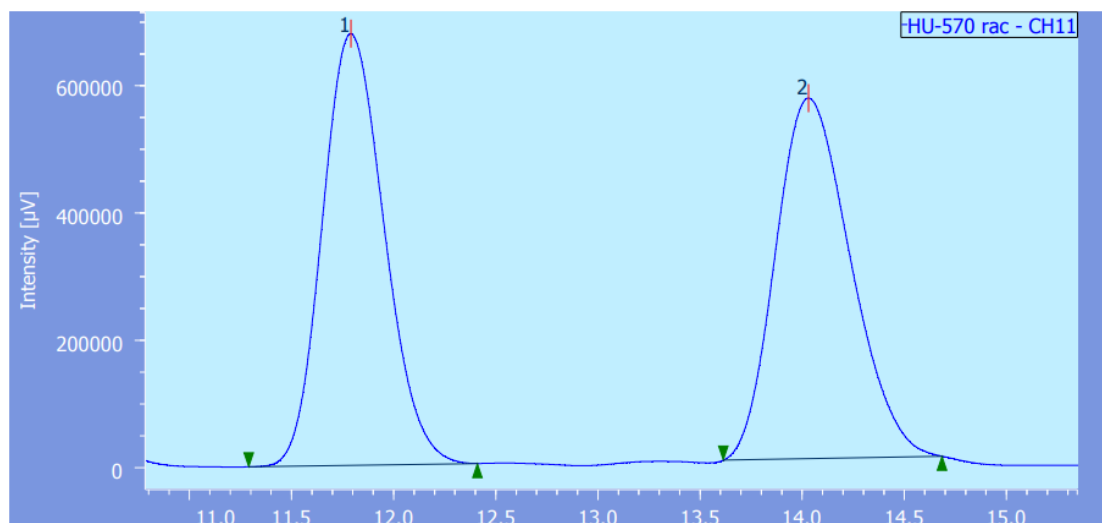

Decision

| # | Peak Name | CH | tR [min] | Area [µV·sec] | Height [µV] | Area%  | Height% | Quantity | NTP  | Resolution | Symmetry Factor | Warning |
|---|-----------|----|----------|---------------|-------------|--------|---------|----------|------|------------|-----------------|---------|
| 1 | Unknown   | 11 | 11.790   | 14282773      | 677839      | 49.706 | 54.484  | N/A      | 7075 | 3.609      | 1.155           |         |
| 2 | Unknown   | 11 | 14.030   | 14451907      | 566275      | 50.294 | 45.516  | N/A      | 6733 | N/A        | 1.216           |         |

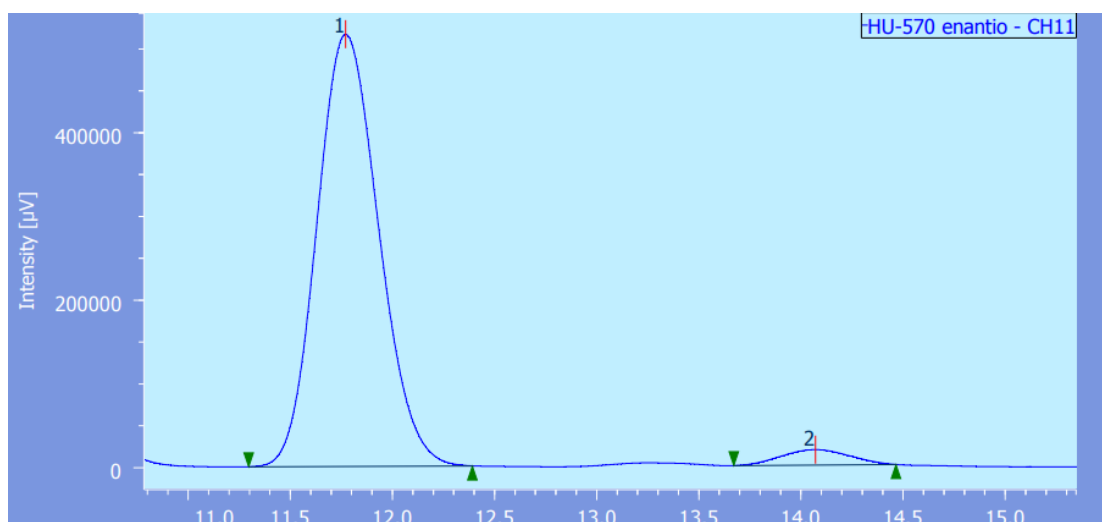

Decision

| # | Peak Name | CH | tR [min] | Area [µV·sec] | Height [µV] | Area%  | Height% | Quantity | NTP  | Resolution | Symmetry Factor | Warning |
|---|-----------|----|----------|---------------|-------------|--------|---------|----------|------|------------|-----------------|---------|
| 1 | Unknown   | 11 | 11.770   | 10840852      | 515725      | 96.175 | 96.555  | N/A      | 7096 | 3.815      | 1.138           |         |
| 2 | Unknown   | 11 | 14.070   | 431179        | 18401       | 3.825  | 3.445   | N/A      | 7496 | N/A        | 1.018           |         |

### *tert*-Butyl (*R*)-2-(4-cyanophenyl)-4-isopropoxy-4-methylpentanoate (**57**)

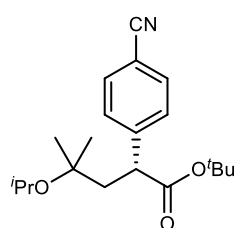

Prepared by **GP-A**. Colorless oil, 47.8 mg, 72% yield.  $^1\text{H}$  NMR (400 MHz,  $\text{CDCl}_3$ )  $\delta$  7.60 – 7.54 (m, 2H), 7.43 – 7.37 (m, 2H), 3.77 (dd,  $J = 8.6, 3.5$  Hz, 1H), 3.72 (dt,  $J = 12.3, 6.2$  Hz, 1H), 2.44 (dd,  $J = 14.2, 8.7$  Hz, 1H), 1.71 (dd,  $J = 14.2, 3.5$  Hz, 1H), 1.34 (s, 9H), 1.14 (s, 3H), 1.10 (s, 3H), 1.07 (d,  $J = 6.1$  Hz, 3H), 1.04 (d,  $J = 6.1$  Hz, 3H);  $^{13}\text{C}$  NMR (101 MHz,  $\text{CDCl}_3$ )  $\delta$  172.6, 146.8, 132.2, 128.7, 118.8, 110.6, 80.9, 74.4, 63.3, 48.4, 44.5, 27.7, 26.3, 26.0, 25.0, 24.9. IR (film):  $\nu$  ( $\text{cm}^{-1}$ ) 2973, 2931, 2872, 2229, 1727, 1607, 1503, 1457, 1382, 1367, 1274, 1244, 1172, 1141, 1114, 1006, 844, 822, 568, 552; HR-MS (ESI)  $m/z$  calcd for  $\text{C}_{20}\text{H}_{29}\text{NNaO}_3^+$  [ $\text{M}+\text{Na}^+$ ] 354.20396, found 354.20414;  $[\alpha]_D^{24.1} = -35.4$  ( $c = 0.1, \text{CHCl}_3$ ); HPLC

conditions: Chiral-NR column, hexane/2-propanol = 98/2, flow rate = 1.0 mL/min,  $\lambda = 254$  nm,  $t_R = 11.6$  min (minor),  $t_R = 13.5$  min (major), 96:4 er.

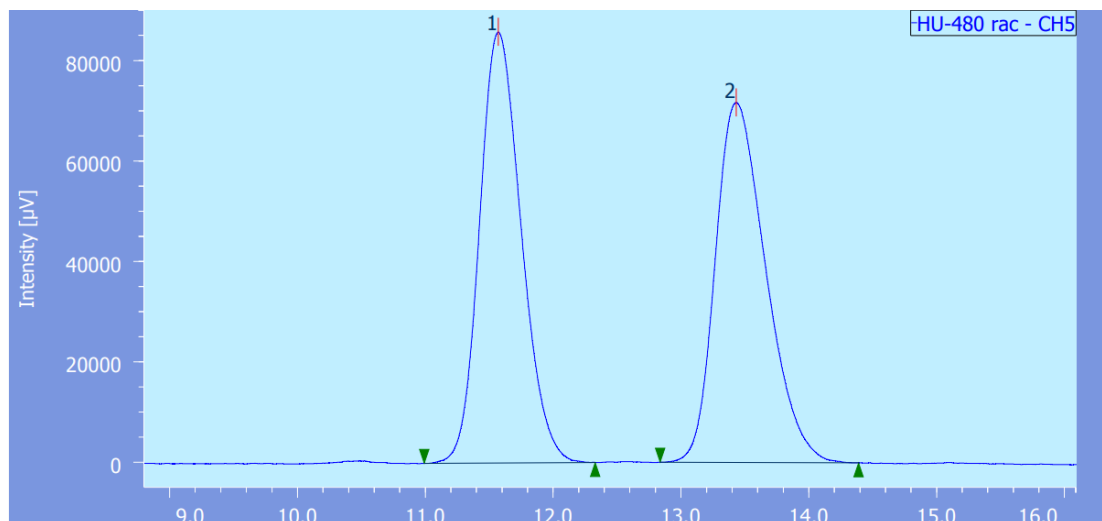

Decision

| # | Peak Name | CH | tR [min] | Area [µV-sec] | Height [µV] | Area%  | Height% | Quantity | NTP  | Resolution | Symmetry Factor | Warning |
|---|-----------|----|----------|---------------|-------------|--------|---------|----------|------|------------|-----------------|---------|
| 1 | Unknown   | 5  | 11.570   | 1943987       | 85784       | 49.712 | 54.480  | N/A      | 6039 | 2.830      | 1.176           |         |
| 2 | Unknown   | 5  | 13.430   | 1966478       | 71675       | 50.288 | 45.520  | N/A      | 5527 | N/A        | 1.321           |         |

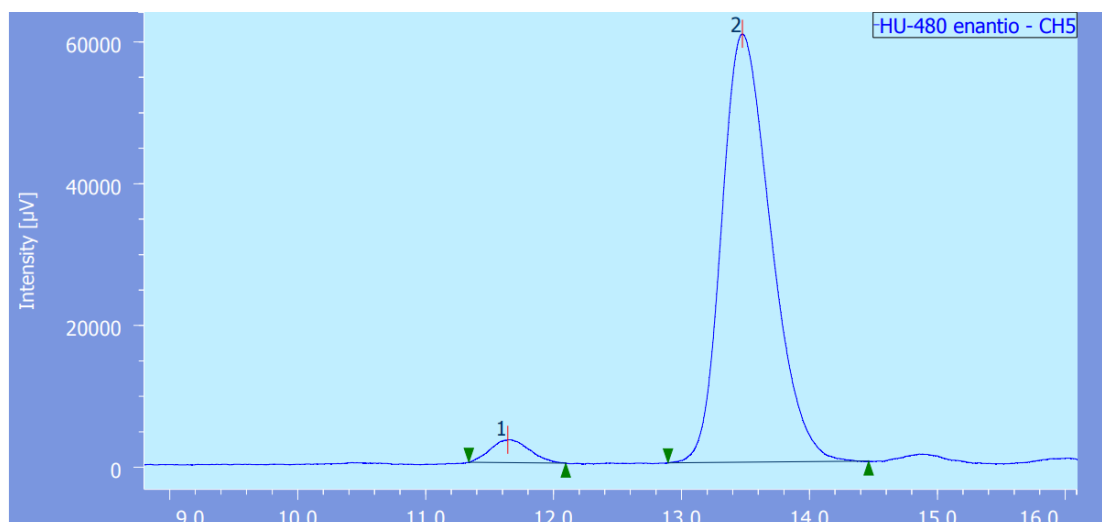

Decision

| # | Peak Name | CH | tR [min] | Area [µV-sec] | Height [µV] | Area%  | Height% | Quantity | NTP  | Resolution | Symmetry Factor | Warning |
|---|-----------|----|----------|---------------|-------------|--------|---------|----------|------|------------|-----------------|---------|
| 1 | Unknown   | 5  | 11.640   | 69191         | 3232        | 4.109  | 5.080   | N/A      | 6321 | 2.857      | 1.169           |         |
| 2 | Unknown   | 5  | 13.473   | 1614860       | 60389       | 95.891 | 94.920  | N/A      | 5909 | N/A        | 1.290           |         |

***tert*-Butyl (2*R*)-2-([1,1'-biphenyl]-4-yl)-3-(1,4-dioxan-2-yl)propanoate (58)**

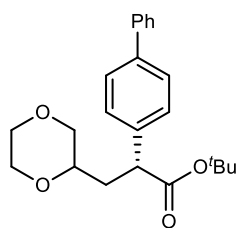

Prepared by **GP-A**. Colorless oil, 48.1 mg, 65% yield.  $^1\text{H}$  NMR (400 MHz,  $\text{CDCl}_3$ )  $\delta$  7.62 – 7.51 (m, 4H), 7.47 – 7.39 (m, 2H), 7.38 – 7.31 (m, 3H), 3.83 – 3.24 (m, 8H), 2.22 – 2.04 (m, 1H), 1.84 – 1.66 (m, 1H), 1.44 – 1.37 (m, 9H);  $^{13}\text{C}$  NMR (101 MHz,  $\text{CDCl}_3$ )  $\delta$  173.0, 172.6, 140.74, 140.71, 140.0, 139.9, 138.7, 138.0, 128.7, 128.4, 128.0, 127.29, 127.26, 127.2, 127.01, 126.99, 81.0, 80.7, 73.5, 72.8, 71.18, 71.15, 66.8, 66.6, 66.49, 66.47, 47.7, 47.5, 35.6, 34.9, 28.0, 27.9. IR (film):  $\nu$  ( $\text{cm}^{-1}$ ) 2963, 2913, 2850, 1723, 1487, 1450, 1366, 1260, 1241, 1146, 1121, 1079, 1008, 910, 873, 844, 760, 733, 697, 624; HR-MS (ESI)  $m/z$  calcd for  $\text{C}_{23}\text{H}_{28}\text{NaO}_4^+$  [ $\text{M}+\text{Na}^+$ ] 391.18798, found 391.18791;  $[\alpha]_D^{24.1} = -51.7$  ( $c = 0.1$ ,  $\text{CHCl}_3$ ); HPLC

conditions: Chiral-NR column, hexane/2-propanol = 99/1, flow rate = 0.5 mL/min,  $\lambda = 254$  nm,  $t_R = 58.0$  min (minor),  $t_R = 85.9$  min (major), 93:7 er;  $t_R = 83.1$  min (minor),  $t_R = 99.5$  min (major), 95:5 er.

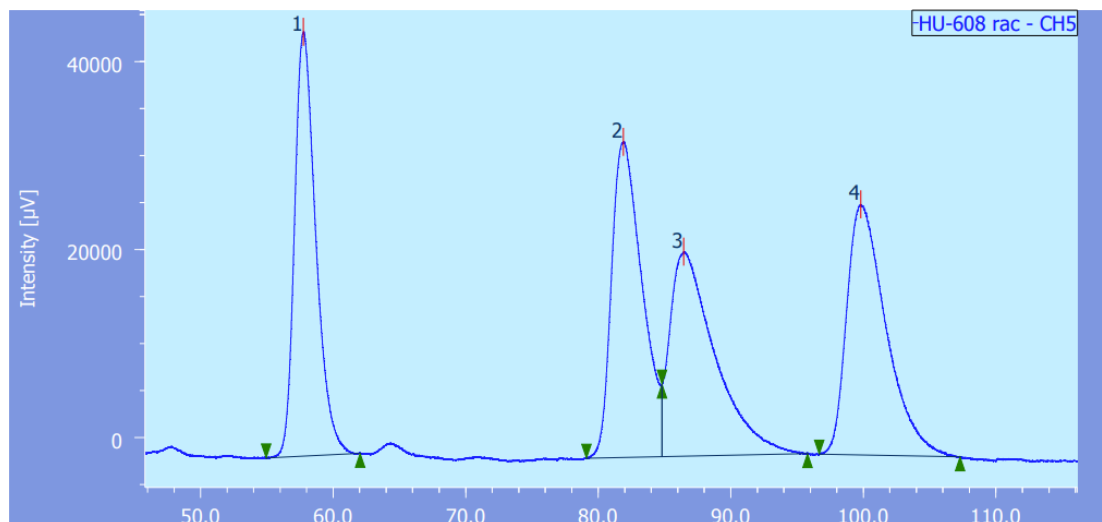

Decision

| # | Peak Name | CH | tR [min] | Area [µV·sec] | Height [µV] | Area%  | Height% | Quantity | NTP  | Resolution | Symmetry Factor | Warning |
|---|-----------|----|----------|---------------|-------------|--------|---------|----------|------|------------|-----------------|---------|
| 1 | Unknown   | 5  | 57.743   | 5017846       | 45104       | 23.866 | 35.492  | N/A      | 6524 | 6.744      | 1.362           |         |
| 2 | Unknown   | 5  | 81.880   | 5383022       | 33553       | 25.603 | 26.402  | N/A      | 5754 | 0.881      | N/A             |         |
| 3 | Unknown   | 5  | 86.427   | 5135575       | 21759       | 24.426 | 17.122  | N/A      | 3286 | 2.366      | N/A             |         |
| 4 | Unknown   | 5  | 99.790   | 5488714       | 26667       | 26.105 | 20.984  | N/A      | 5684 | N/A        | 1.630           |         |

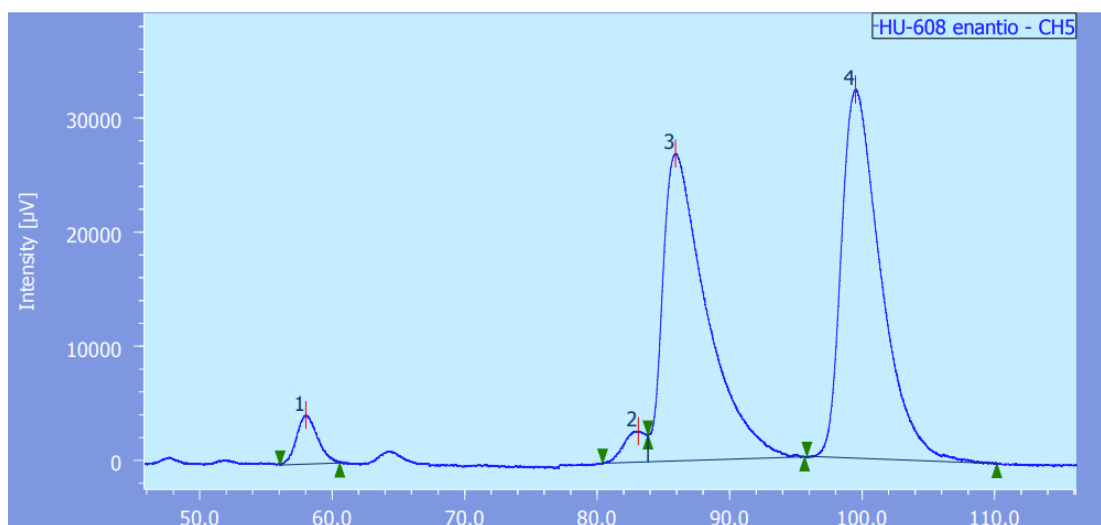

Decision

| # | Peak Name | CH | tR [min] | Area [µV·sec] | Height [µV] | Area%  | Height% | Quantity | NTP  | Resolution | Symmetry Factor | Warning |
|---|-----------|----|----------|---------------|-------------|--------|---------|----------|------|------------|-----------------|---------|
| 1 | Unknown   | 5  | 58.010   | 475436        | 4308        | 3.489  | 6.506   | N/A      | 6447 | N/A        | 1.155           |         |
| 2 | Unknown   | 5  | 83.100   | 320978        | 2713        | 2.355  | 4.097   | N/A      | N/A  | N/A        | N/A             |         |
| 3 | Unknown   | 5  | 85.897   | 6172603       | 26912       | 45.294 | 40.644  | N/A      | 3698 | 2.497      | N/A             |         |
| 4 | Unknown   | 5  | 99.477   | 6658839       | 32282       | 48.862 | 48.753  | N/A      | 5732 | N/A        | 1.667           |         |

***tert*-Butyl (*R*)-2-(4-cyanophenyl)-4-ethyl-4-hydroxyhexanoate (**59**)**

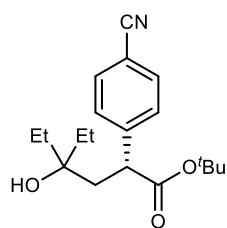

Prepared by **GP-C**. White solid, 51.3 mg, 81% yield. m.p. = 100-101 °C;  $^1\text{H}$  NMR (400 MHz,  $\text{CDCl}_3$ )  $\delta$  7.63 – 7.56 (m, 2H), 7.44 – 7.38 (m, 2H), 3.75 (dd,  $J = 9.9, 3.1$  Hz, 1H), 2.43 (dd,  $J = 14.5, 9.9$  Hz, 1H), 1.63 (dd,  $J = 14.5, 3.1$  Hz, 1H), 1.54 – 1.45 (m, 4H), 1.36 (s, 9H), 0.87 (t,  $J = 7.5$  Hz, 3H), 0.81 (t,  $J = 7.5$  Hz, 3H);  $^{13}\text{C}$  NMR (101 MHz,  $\text{CDCl}_3$ )  $\delta$  173.0, 146.5, 132.4, 128.5, 118.7, 110.8, 81.4, 74.4, 47.9, 41.9, 31.6, 30.0, 27.8, 8.1, 7.6. IR (film):  $\nu$

( $\text{cm}^{-1}$ ) 3532, 2969, 2932, 2880, 2227, 1719, 1604, 1456, 1365, 1344, 1243, 1233, 1149, 1143, 979, 879, 842, 562, 481; HR-MS (ESI)  $m/z$  calcd for  $\text{C}_{19}\text{H}_{27}\text{NNaO}_3^+$  [ $\text{M}+\text{Na}^+$ ] 340.18831, found 340.18826;  $[\alpha]_{\text{D}}^{24.0} = -21.2$  ( $c = 0.1$ ,  $\text{CHCl}_3$ ); HPLC conditions: IC column, hexane/2-propanol = 95/5, flow rate = 0.5 mL/min,  $\lambda = 230$  nm,  $t_{\text{R}} = 22.2$  min (minor),  $t_{\text{R}} = 23.6$  min (major), 95:5 er.

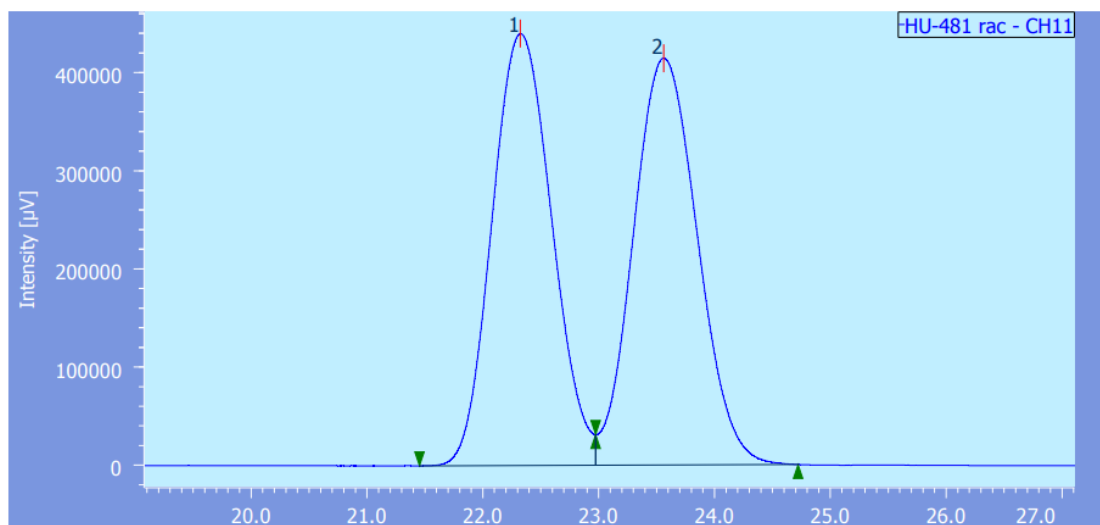

Decision

| # | Peak Name | CH | tR [min] | Area [ $\mu\text{V}\cdot\text{sec}$ ] | Height [ $\mu\text{V}$ ] | Area%  | Height% | Quantity | NTP  | Resolution | Symmetry Factor | Warning |
|---|-----------|----|----------|---------------------------------------|--------------------------|--------|---------|----------|------|------------|-----------------|---------|
| 1 | Unknown   | 11 | 22.323   | 15796131                              | 439770                   | 49.722 | 51.489  | N/A      | 8478 | 1.238      | N/A             |         |
| 2 | Unknown   | 11 | 23.560   | 15972909                              | 414326                   | 50.278 | 48.511  | N/A      | 8328 | N/A        | N/A             |         |

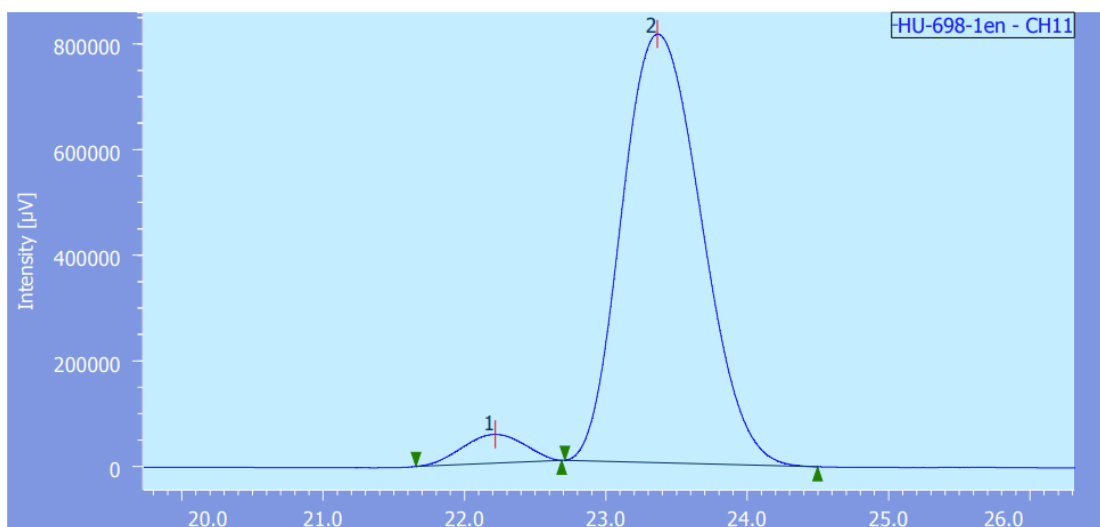

Decision

| # | Peak Name | CH | tR [min] | Area [ $\mu\text{V}\cdot\text{sec}$ ] | Height [ $\mu\text{V}$ ] | Area%  | Height% | Quantity | NTP   | Resolution | Symmetry Factor | Warning |
|---|-----------|----|----------|---------------------------------------|--------------------------|--------|---------|----------|-------|------------|-----------------|---------|
| 1 | Unknown   | 11 | 22.217   | 1675693                               | 54454                    | 5.021  | 6.293   | N/A      | 10624 | 1.194      | 0.934           |         |
| 2 | Unknown   | 11 | 23.363   | 31697319                              | 810848                   | 94.979 | 93.707  | N/A      | 7713  | N/A        | 1.188           |         |

### *tert*-Butyl (*R*)-2-(4-cyanophenyl)-3-(1-methoxycyclopentyl)propanoate (**60**)

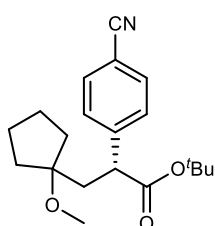

Prepared by GP-C. White solid, 36.2 mg, 55% yield. m.p. = 66-67 °C;  $^1\text{H}$  NMR (400 MHz,  $\text{CDCl}_3$ )  $\delta$  7.62 – 7.57 (m, 2H), 7.46 – 7.41 (m, 2H), 3.73 (dd,  $J = 8.0, 4.3$  Hz, 1H), 3.02 (s, 3H), 2.55 (dd,  $J = 14.7, 8.1$  Hz, 1H), 1.87 – 1.78 (m, 2H), 1.77 – 1.62 (m, 3H), 1.61 – 1.52 (m, 2H), 1.45 – 1.42 (m, 1H), 1.36 (s, 9H), 1.27 – 1.21 (m, 1H);  $^{13}\text{C}$  NMR (101 MHz,  $\text{CDCl}_3$ )  $\delta$  172.4, 146.6, 132.3, 128.7, 118.8, 110.8, 86.2, 81.1, 49.3, 48.7, 38.7, 35.7, 35.7, 27.8, 23.31, 23.29. IR (film):  $\nu$  ( $\text{cm}^{-1}$ ) 2967, 2934, 2872, 2826, 2226, 1719, 1604, 1502, 1456, 1367, 1357, 1223,

1142, 1075, 1019, 857, 839, 760, 562; HR-MS (ESI)  $m/z$  calcd for  $C_{20}H_{27}NNaO_3^+$   $[M+Na]^+$  352.18831, found 352.18839;  $[\alpha]_D^{24.1} = -27.2$  ( $c = 0.1$ ,  $CHCl_3$ ); HPLC conditions: Chiral-NR column, hexane/2-propanol = 98/2, flow rate = 1.0 mL/min,  $\lambda = 240$  nm,  $t_R = 14.3$  min (minor),  $t_R = 16.8$  min (major), 95:5 er.

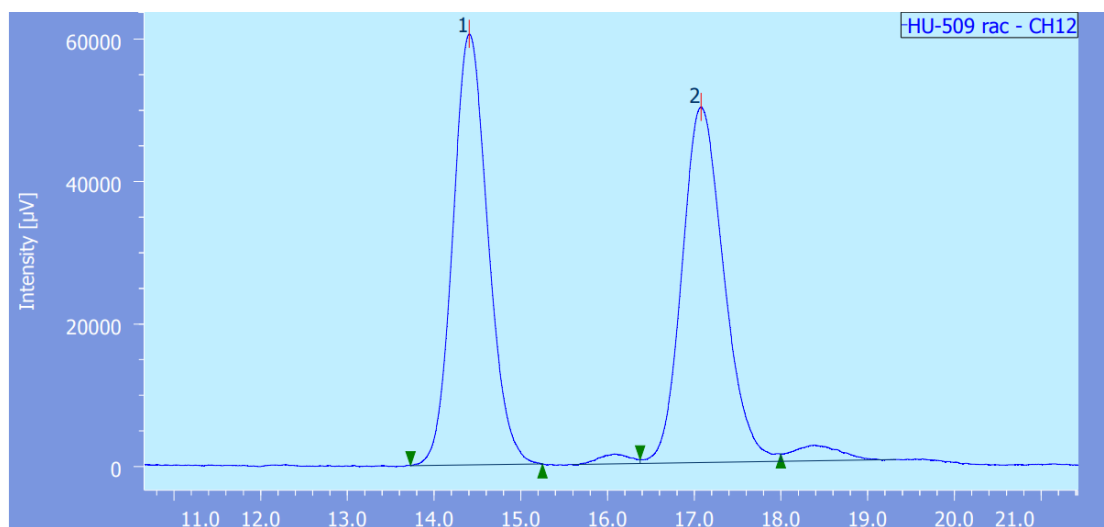

Decision

| # | Peak Name | CH | tR [min] | Area [µV·sec] | Height [µV] | Area%  | Height% | Quantity | NTP  | Resolution | Symmetry Factor | Warning |
|---|-----------|----|----------|---------------|-------------|--------|---------|----------|------|------------|-----------------|---------|
| 1 | Unknown   | 12 | 14.403   | 1699636       | 60454       | 50.381 | 54.800  | N/A      | 6174 | 3.340      | 1.126           |         |
| 2 | Unknown   | 12 | 17.077   | 1673902       | 49863       | 49.619 | 45.200  | N/A      | 6139 | N/A        | 1.173           |         |

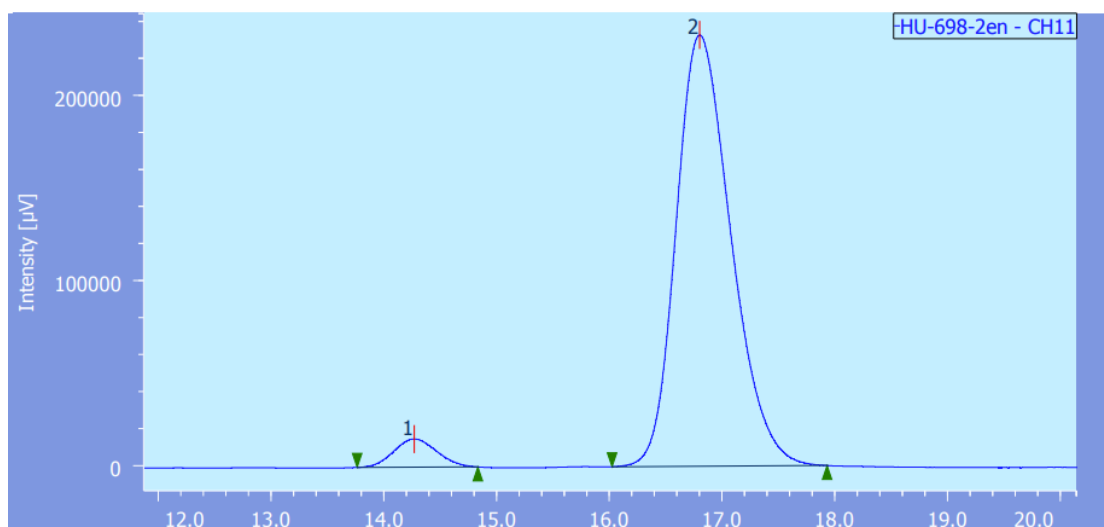

Decision

| # | Peak Name | CH | tR [min] | Area [µV·sec] | Height [µV] | Area%  | Height% | Quantity | NTP  | Resolution | Symmetry Factor | Warning |
|---|-----------|----|----------|---------------|-------------|--------|---------|----------|------|------------|-----------------|---------|
| 1 | Unknown   | 11 | 14.270   | 407352        | 15249       | 4.921  | 6.146   | N/A      | 6338 | 3.166      | 1.084           |         |
| 2 | Unknown   | 11 | 16.800   | 7869866       | 232874      | 95.079 | 93.854  | N/A      | 5759 | N/A        | 1.263           |         |

### 2-Methyl-4-phenylbutan-2-yl (*R*)-2-(4-cyanophenyl)-3-cyclohexylpropanoate (**61**)

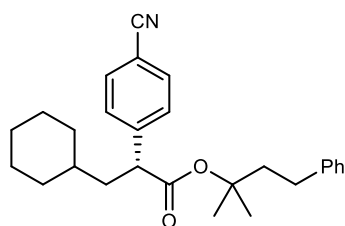

Prepared by **GP-A**. Colorless oil, 58.0 mg, 72% yield.  $^1H$  NMR (400 MHz,  $CDCl_3$ )  $\delta$  7.63 – 7.55 (m, 2H), 7.45 – 7.38 (m, 2H), 7.26 – 7.21 (m, 2H), 7.18 – 7.13 (m, 1H), 7.09 – 7.03 (m, 2H), 3.64 (t,  $J = 7.8$  Hz, 1H), 2.52 – 2.37 (m, 2H), 2.02 – 1.90 (m, 3H), 1.74 – 1.57 (m, 6H), 1.42 (s, 3H), 1.41 (s, 3H), 1.18 – 1.07 (m, 4H), 0.97 – 0.84 (m, 2H);  $^{13}C$  NMR (101 MHz,  $CDCl_3$ )  $\delta$  172.2, 145.4, 141.7, 132.3, 128.7, 128.4, 128.2, 125.8, 118.7, 110.9, 82.9, 50.0, 42.6, 40.7, 35.4, 33.2, 33.0,

30.1, 26.3, 26.04, 26.02, 25.9, 25.8. IR (film):  $\nu$  (cm<sup>-1</sup>) 2975, 2922, 2852, 2228, 1725, 1605, 1498, 1449, 1384, 1368, 1273, 1248, 1203, 1179, 1160, 1154, 1118, 1074, 1021, 968, 848, 838, 765, 744, 698, 576, 552; HR-MS (ESI)  $m/z$  calcd for C<sub>27</sub>H<sub>33</sub>NNaO<sub>2</sub><sup>+</sup> [M+Na<sup>+</sup>] 426.24035, found 426.24032;  $[\alpha]_D^{24.3} = -28.8$  ( $c = 0.1$ , CHCl<sub>3</sub>); HPLC conditions: Chiral-NR column, hexane/2-propanol = 98/2, flow rate = 1.0 mL/min,  $\lambda = 230$  nm,  $t_R = 22.9$  min (minor),  $t_R = 27.3$  min (major), 94:6 er.

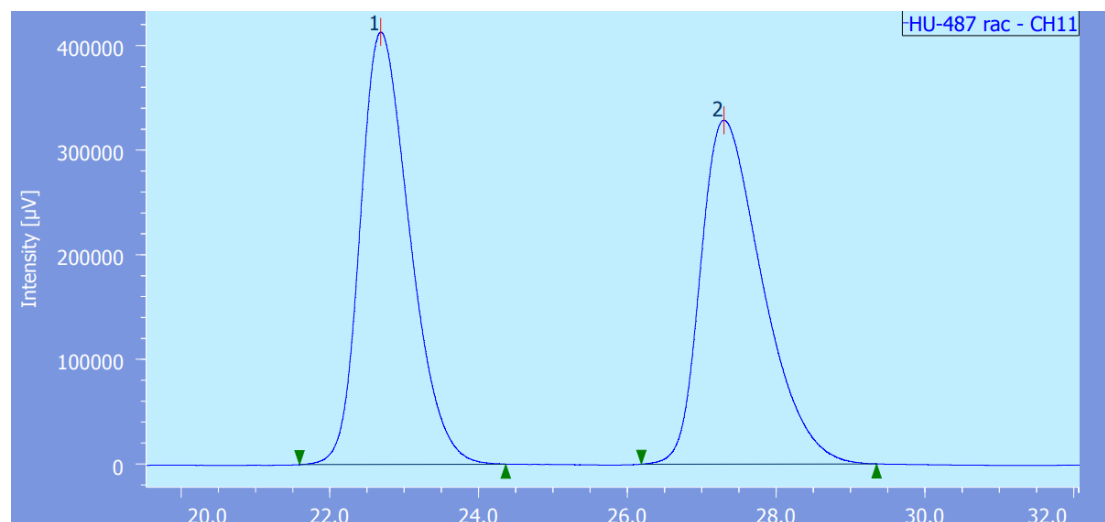

Decision

| # | Peak Name | CH | tR [min] | Area [μV·sec] | Height [μV] | Area%  | Height% | Quantity | NTP  | Resolution | Symmetry Factor | Warning |
|---|-----------|----|----------|---------------|-------------|--------|---------|----------|------|------------|-----------------|---------|
| 1 | Unknown   | 11 | 22.683   | 19144760      | 413241      | 50.144 | 55.704  | N/A      | 5617 | 3.399      | 1.303           |         |
| 2 | Unknown   | 11 | 27.297   | 19034496      | 328604      | 49.856 | 44.296  | N/A      | 5219 | N/A        | 1.493           |         |

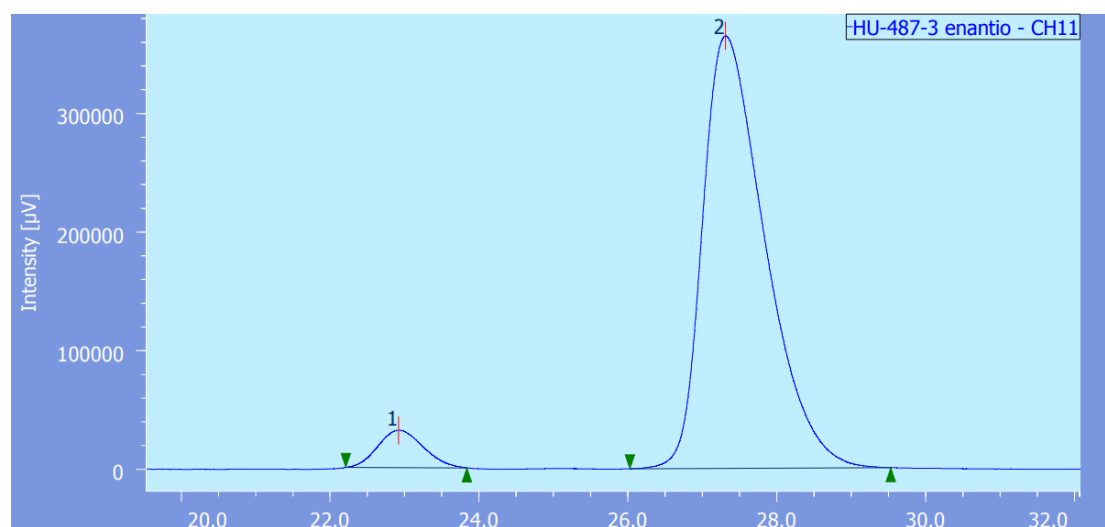

Decision

| # | Peak Name | CH | tR [min] | Area [μV·sec] | Height [μV] | Area%  | Height% | Quantity | NTP  | Resolution | Symmetry Factor | Warning |
|---|-----------|----|----------|---------------|-------------|--------|---------|----------|------|------------|-----------------|---------|
| 1 | Unknown   | 11 | 22.917   | 1341953       | 31574       | 5.944  | 7.972   | N/A      | 6436 | 3.312      | 1.139           |         |
| 2 | Unknown   | 11 | 27.310   | 21234055      | 364490      | 94.056 | 92.028  | N/A      | 5181 | N/A        | 1.527           |         |

### 2,3,3-Trimethylbutan-2-yl (*R*)-2-(4-cyanophenyl)-3-cyclohexylpropanoate (**62**)

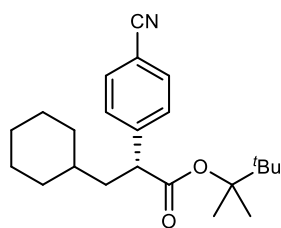

Prepared by **GP-A**. Colorless oil, 51.2 mg, 72% yield. <sup>1</sup>H NMR (400 MHz, CDCl<sub>3</sub>)  $\delta$  7.64 – 7.56 (m, 2H), 7.44 – 7.35 (m, 2H), 3.65 (t,  $J = 7.8$  Hz, 1H), 1.97 (ddd,  $J = 13.9, 7.9, 7.4$  Hz, 1H), 1.76 – 1.57 (m, 6H), 1.45 (s, 3H), 1.37 (s, 3H), 1.19 – 1.08 (m, 4H), 0.98 – 0.89 (m, 2H), 0.86 (s, 9H); <sup>13</sup>C NMR (101 MHz, CDCl<sub>3</sub>)  $\delta$  172.2, 145.6, 132.3, 128.8, 118.8, 110.8, 88.0, 50.4, 40.4, 38.3, 35.3, 33.2, 33.0, 26.4, 26.1, 25.0,



20.4, 20.2. IR (film):  $\nu$  ( $\text{cm}^{-1}$ ) 2978, 2922, 2848, 2229, 1717, 1606, 1505, 1464, 1447, 1377, 1368, 1275, 1261, 1212, 1178, 1169, 1124, 938, 847, 835, 784, 578, 552; HR-MS (ESI)  $m/z$  calcd for  $\text{C}_{23}\text{H}_{33}\text{NNaO}_2^+$  [ $\text{M}+\text{Na}^+$ ] 378.24035, found 378.24056;  $[\alpha]_{\text{D}}^{24.2} = -31.0$  ( $c = 0.1$ ,  $\text{CHCl}_3$ ); HPLC conditions: Chiral-NR column, hexane/2-propanol = 98/2, flow rate = 1.0 mL/min,  $\lambda = 230$  nm,  $t_{\text{R}} = 15.2$  min (minor),  $t_{\text{R}} = 18.4$  min (major), 96:4 er.

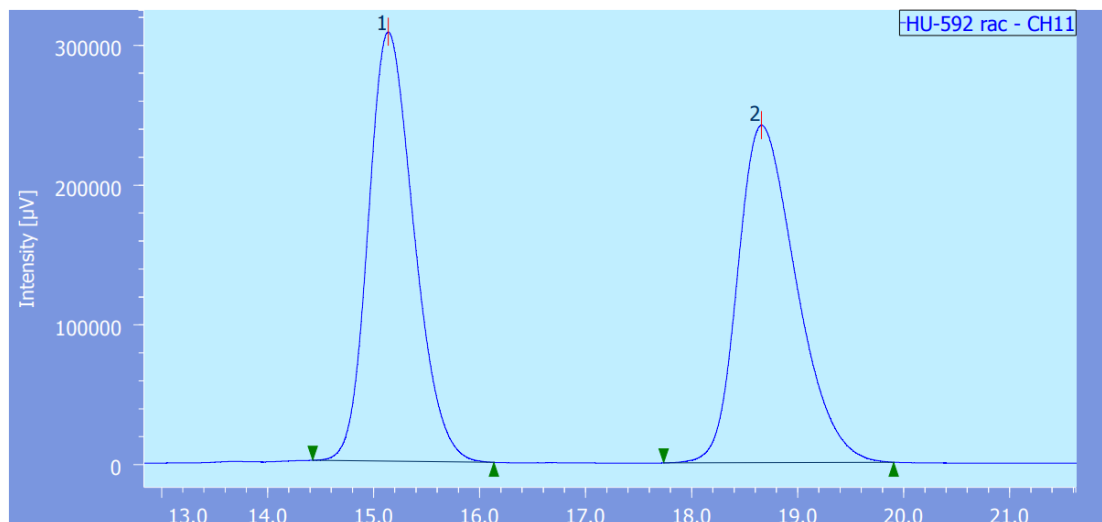

Decision

| # | Peak Name | CH | tR [min] | Area [ $\mu\text{V}\cdot\text{sec}$ ] | Height [ $\mu\text{V}$ ] | Area%  | Height% | Quantity | NTP  | Resolution | Symmetry Factor | Warning |
|---|-----------|----|----------|---------------------------------------|--------------------------|--------|---------|----------|------|------------|-----------------|---------|
| 1 | Unknown   | 11 | 15.137   | 9198695                               | 307012                   | 49.791 | 55.997  | N/A      | 5935 | 3.937      | 1.223           |         |
| 2 | Unknown   | 11 | 18.657   | 9275758                               | 241257                   | 50.209 | 44.003  | N/A      | 5493 | N/A        | 1.343           |         |

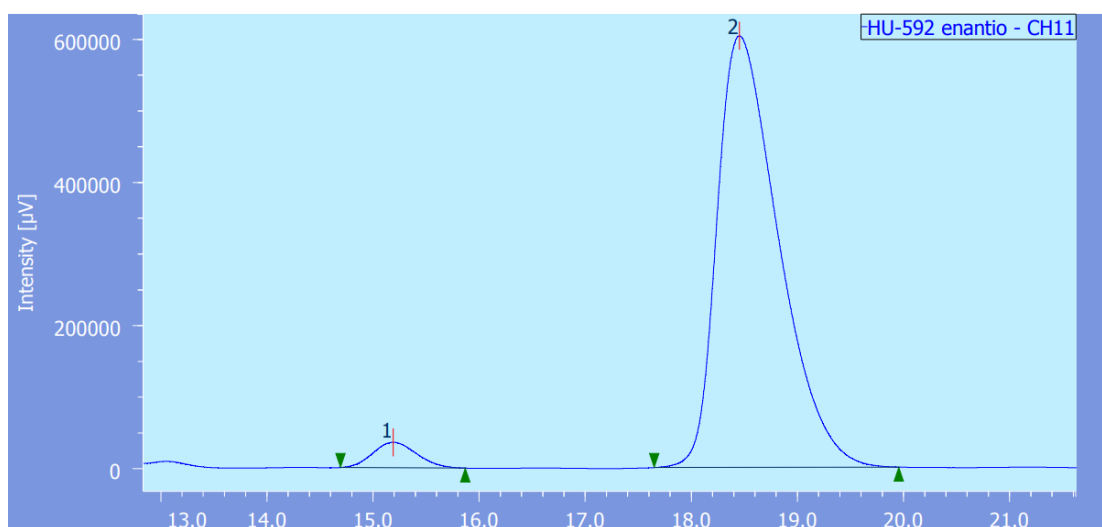

Decision

| # | Peak Name | CH | tR [min] | Area [ $\mu\text{V}\cdot\text{sec}$ ] | Height [ $\mu\text{V}$ ] | Area%  | Height% | Quantity | NTP  | Resolution | Symmetry Factor | Warning |
|---|-----------|----|----------|---------------------------------------|--------------------------|--------|---------|----------|------|------------|-----------------|---------|
| 1 | Unknown   | 11 | 15.190   | 1032599                               | 35687                    | 4.076  | 5.589   | N/A      | 6133 | 3.572      | 1.126           |         |
| 2 | Unknown   | 11 | 18.453   | 24300440                              | 602797                   | 95.924 | 94.411  | N/A      | 4886 | N/A        | 1.553           |         |

### 1-Methylcyclohexyl (*R*)-2-(4-cyanophenyl)-3-cyclohexylpropanoate (63)

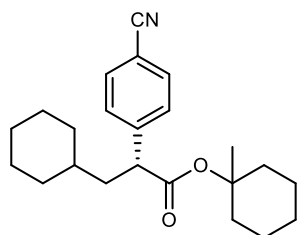

Prepared by **GP-A**. White solid, 45.4 mg, 64% yield. m.p. = 62–63 °C;  $^1\text{H}$  NMR (400 MHz,  $\text{CDCl}_3$ )  $\delta$  7.64 – 7.56 (m, 2H), 7.46 – 7.39 (m, 2H), 3.67 (t,  $J = 7.8$  Hz, 1H), 2.12 – 2.03 (m, 2H), 1.97 (ddd,  $J = 13.8$ , 8.1, 7.2 Hz, 1H), 1.76 – 1.56 (m, 6H), 1.46 – 1.40 (m, 2H), 1.38 (s, 3H), 1.36 – 1.23 (m, 4H), 1.21 – 1.08 (m, 6H), 0.98 – 0.84 (m, 2H);  $^{13}\text{C}$  NMR (101 MHz,  $\text{CDCl}_3$ )  $\delta$  172.1, 145.5, 132.2, 128.8, 118.8, 110.8,

82.7, 50.2, 40.5, 36.8, 36.2, 35.3, 33.2, 33.0, 26.4, 26.04 (two peaks), 25.4, 25.1, 21.9, 21.8. IR (film):  $\nu$  (cm<sup>-1</sup>) 2971, 2918, 2850, 2232, 1712, 1607, 1504, 1447, 1367, 1359, 1274, 1216, 1187, 1144, 1026, 960, 930, 895, 865, 835, 805, 746, 576, 551, 490; HR-MS (ESI)  $m/z$  calcd for C<sub>23</sub>H<sub>31</sub>NNaO<sub>2</sub><sup>+</sup> [M+Na<sup>+</sup>] 376.22470, found 376.22492;  $[\alpha]_D^{24.2} = -23.8$  ( $c = 0.1$ , CHCl<sub>3</sub>); HPLC conditions: Chiral-NR column, hexane/2-propanol = 98/2, flow rate = 1.0 mL/min,  $\lambda = 230$  nm,  $t_R = 16.3$  min (minor),  $t_R = 18.5$  min (major), 96:4 er.

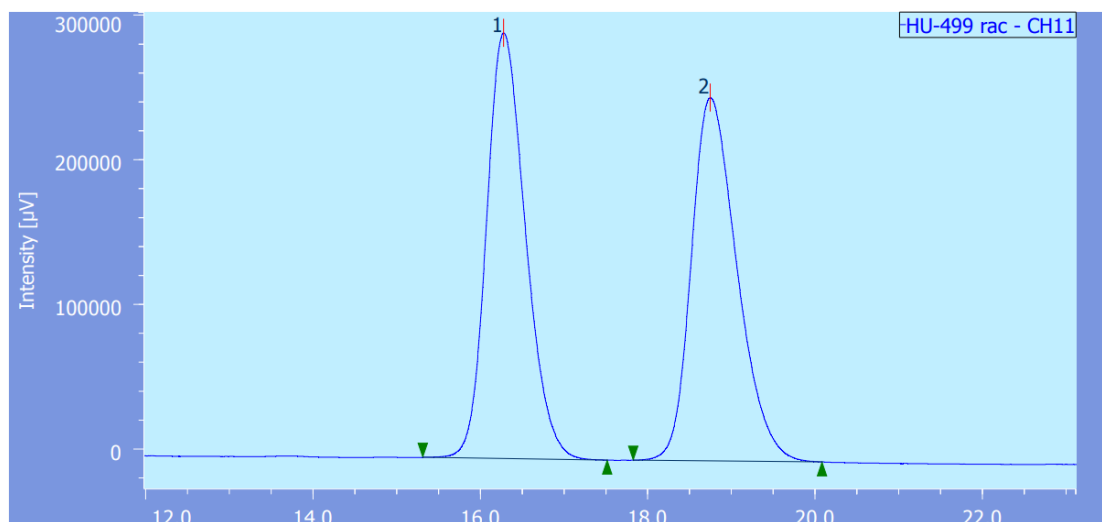

Decision

| # | Peak Name | CH | tR [min] | Area [ $\mu$ V·sec] | Height [ $\mu$ V] | Area%  | Height% | Quantity | NTP  | Resolution | Symmetry Factor | Warning |
|---|-----------|----|----------|---------------------|-------------------|--------|---------|----------|------|------------|-----------------|---------|
| 1 | Unknown   | 11 | 16.277   | 9518707             | 294157            | 49.977 | 53.948  | N/A      | 5927 | 2.697      | 1.207           |         |
| 2 | Unknown   | 11 | 18.747   | 9527633             | 251099            | 50.023 | 46.052  | N/A      | 5727 | N/A        | 1.299           |         |

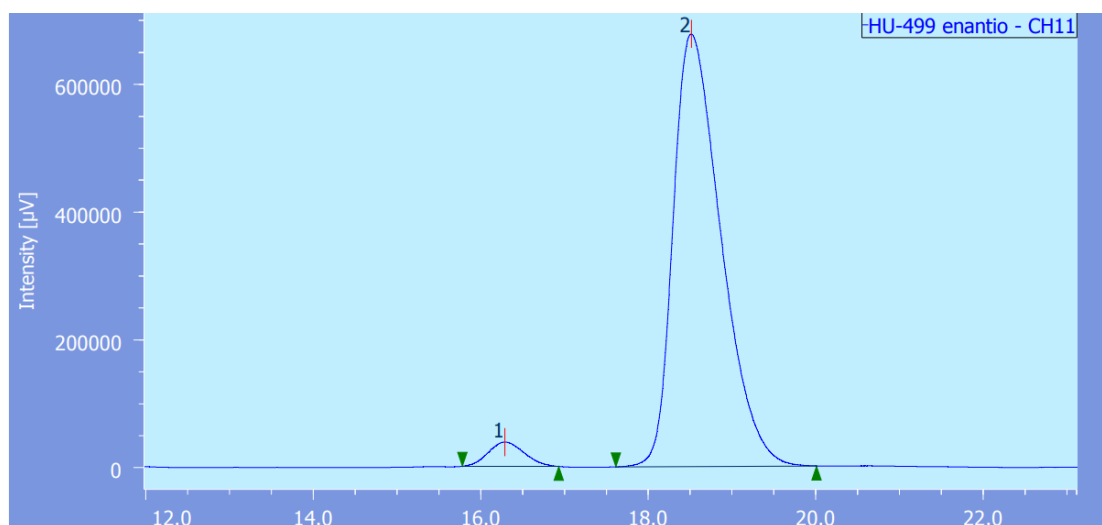

Decision

| # | Peak Name | CH | tR [min] | Area [ $\mu$ V·sec] | Height [ $\mu$ V] | Area%  | Height% | Quantity | NTP  | Resolution | Symmetry Factor | Warning |
|---|-----------|----|----------|---------------------|-------------------|--------|---------|----------|------|------------|-----------------|---------|
| 1 | Unknown   | 11 | 16.287   | 1140903             | 38071             | 4.075  | 5.325   | N/A      | 6539 | 2.418      | 1.122           |         |
| 2 | Unknown   | 11 | 18.513   | 26857467            | 676873            | 95.925 | 94.675  | N/A      | 5063 | N/A        | 1.473           |         |

### Pentan-3-yl (*R*)-2-(4-cyanophenyl)-3-cyclohexylpropanoate (**64**)

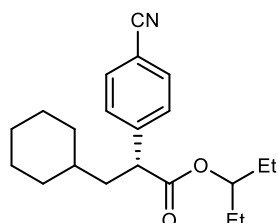

Prepared by GP-B. Colorless oil, 46.1 mg, 70% yield. <sup>1</sup>H NMR (400 MHz, CDCl<sub>3</sub>)  $\delta$  7.64 – 7.55 (m, 2H), 7.48 – 7.40 (m, 2H), 4.76 – 4.66 (m, 1H), 3.74 (dd,  $J = 8.3, 7.3$  Hz, 1H), 2.00 (ddd,  $J = 13.9, 8.5, 6.8$  Hz, 1H), 1.76 – 1.61 (m, 6H), 1.57 – 1.50 (m, 2H), 1.50 – 1.38 (m, 2H), 1.21 – 1.07 (m, 4H), 0.98 – 0.86 (m, 2H), 0.83 (t,  $J = 7.5$  Hz, 3H), 0.66 (t,  $J$

= 7.4 Hz, 3H);  $^{13}\text{C}$  NMR (101 MHz,  $\text{CDCl}_3$ )  $\delta$  173.0, 145.2, 132.3, 128.8, 118.8, 111.0, 49.4, 40.8, 35.4, 33.1, 33.1, 26.4, 26.4, 26.3, 26.0, 9.5, 9.3. IR (film):  $\nu$  ( $\text{cm}^{-1}$ ) 2968, 2924, 2851, 2228, 1727, 1608, 1503, 1461, 1449, 1384, 1273, 1261, 1215, 1165, 1113, 1102, 1034, 974, 921, 891, 848, 837, 578, 552, 504; HR-MS (ESI)  $m/z$  calcd for  $\text{C}_{21}\text{H}_{29}\text{NNaO}_2^+$   $[\text{M}+\text{Na}^+]$  350.20905, found 350.20859;  $[\alpha]_{\text{D}}^{24.1} = -32.7$  ( $c = 0.1$ ,  $\text{CHCl}_3$ ); HPLC conditions: Chiral-NR column, hexane/2-propanol = 98/2, flow rate = 1.0 mL/min,  $\lambda = 230$  nm,  $t_{\text{R}} = 17.9$  min (minor),  $t_{\text{R}} = 22.5$  min (major), 95:5 er.

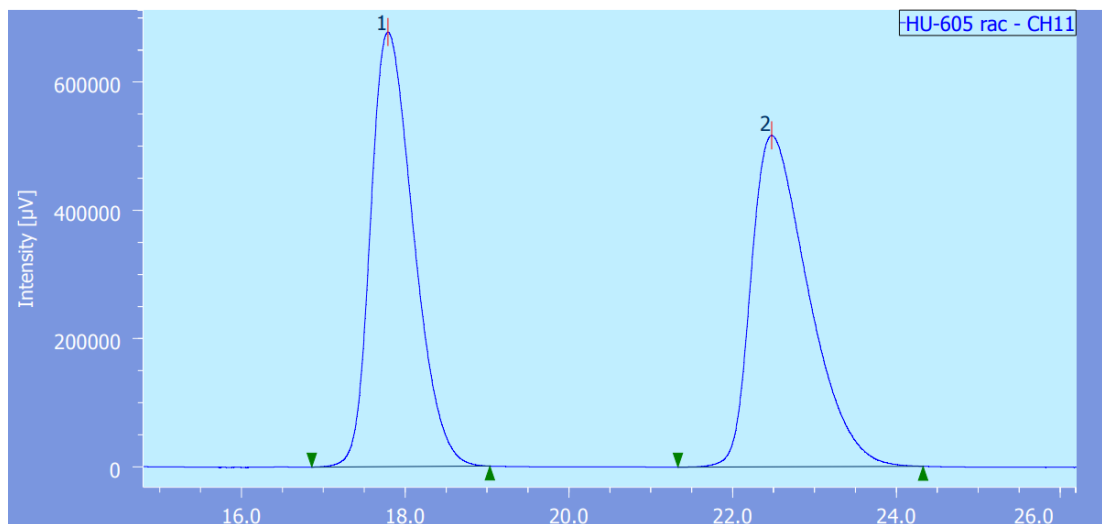

Decision

| # | Peak Name | CH | tR [min] | Area [ $\mu\text{V}\cdot\text{sec}$ ] | Height [ $\mu\text{V}$ ] | Area%  | Height% | Quantity | NTP  | Resolution | Symmetry Factor | Warning |
|---|-----------|----|----------|---------------------------------------|--------------------------|--------|---------|----------|------|------------|-----------------|---------|
| 1 | Unknown   | 11 | 17.790   | 24691685                              | 677372                   | 49.590 | 56.741  | N/A      | 5480 | 4.203      | 1.340           |         |
| 2 | Unknown   | 11 | 22.473   | 25100132                              | 516430                   | 50.410 | 43.259  | N/A      | 4986 | N/A        | 1.601           |         |

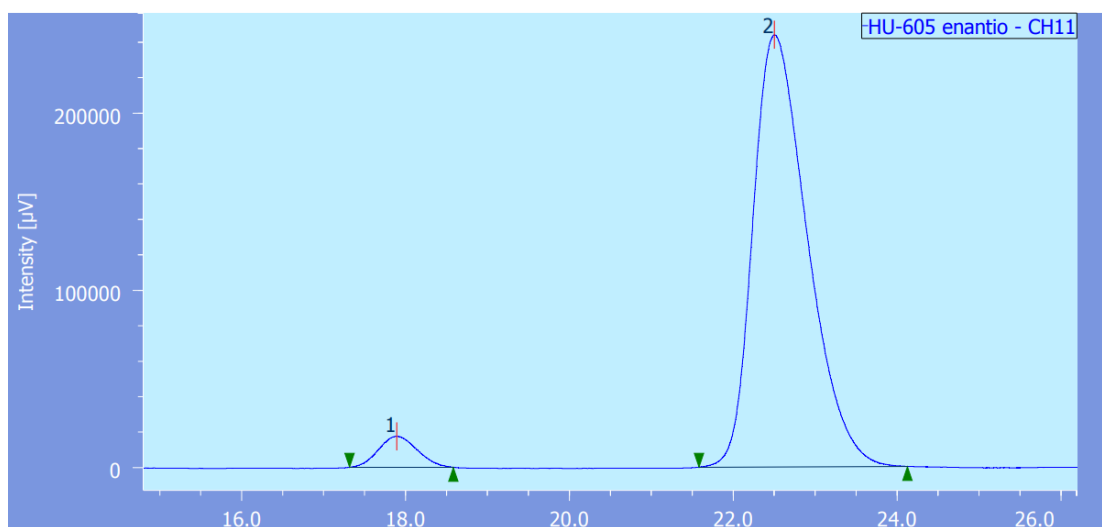

Decision

| # | Peak Name | CH | tR [min] | Area [ $\mu\text{V}\cdot\text{sec}$ ] | Height [ $\mu\text{V}$ ] | Area%  | Height% | Quantity | NTP  | Resolution | Symmetry Factor | Warning |
|---|-----------|----|----------|---------------------------------------|--------------------------|--------|---------|----------|------|------------|-----------------|---------|
| 1 | Unknown   | 11 | 17.893   | 579837                                | 17506                    | 4.906  | 6.702   | N/A      | 6442 | 4.393      | 1.095           |         |
| 2 | Unknown   | 11 | 22.500   | 11239798                              | 243703                   | 95.094 | 93.298  | N/A      | 5523 | N/A        | 1.398           |         |

### 2,4-Dimethylpentan-3-yl (*R*)-2-(4-cyanophenyl)-3-cyclohexylpropanoate (**65**)

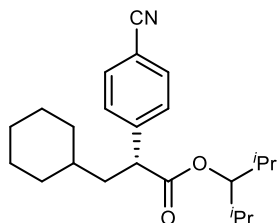

Prepared by GP-A. White solid, 50.6 mg, 71% yield. m.p. = 77-78 °C;  $^1\text{H}$  NMR (400 MHz,  $\text{CDCl}_3$ )  $\delta$  7.63 – 7.56 (m, 2H), 7.49 – 7.40 (m, 2H), 4.53 (t,  $J = 6.1$  Hz, 1H), 3.77 (t,  $J = 7.8$  Hz, 1H), 2.07 – 1.96 (m, 1H), 1.88 – 1.76 (m, 2H), 1.75 – 1.61 (m, 5H), 1.19 – 1.07 (m, 4H), 0.96 – 0.84 (m, 3H), 0.82 (d,  $J = 6.8$  Hz, 3H), 0.78 (d,  $J = 6.7$  Hz, 3H), 0.65 (d,

$J = 6.8$  Hz, 3H), 0.62 (d,  $J = 6.7$  Hz, 3H);  $^{13}\text{C}$  NMR (101 MHz,  $\text{CDCl}_3$ )  $\delta$  173.0, 145.2, 132.3, 129.0, 118.8, 111.0, 83.3, 49.4, 40.5, 35.2, 33.09, 33.08, 29.4, 29.3, 26.4, 26.0, 19.45, 19.37, 17.2, 16.8. IR (film):  $\nu$  ( $\text{cm}^{-1}$ ) 2963, 2919, 2851, 2227, 1720, 1604, 1501, 1467, 1450, 1443, 1387, 1370, 1342, 1293, 1261, 1217, 1182, 1170, 1128, 1096, 976, 938, 902, 891, 848, 837, 780, 737, 690, 574, 549, 487; HR-MS (ESI)  $m/z$  calcd for  $\text{C}_{23}\text{H}_{33}\text{NNaO}_2^+$  [ $\text{M}+\text{Na}^+$ ] 378.24035, found 378.24027;  $[\alpha]_{\text{D}}^{24.1} = -29.7$  ( $c = 0.1$ ,  $\text{CHCl}_3$ ); HPLC conditions: Chiral-NR column, hexane/2-propanol = 99.5/0.5, flow rate = 0.5 mL/min,  $\lambda = 230$  nm,  $t_{\text{R}} = 47.9$  min (minor),  $t_{\text{R}} = 50.5$  min (major), 96:4 er.

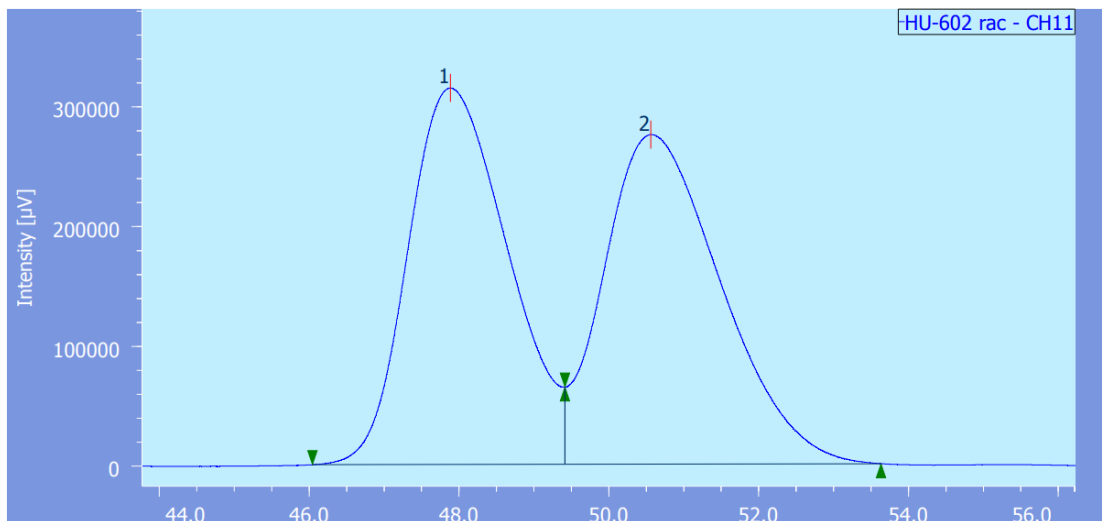

Decision

| # | Peak Name | CH | tR [min] | Area [ $\mu\text{V}\cdot\text{sec}$ ] | Height [ $\mu\text{V}$ ] | Area%  | Height% | Quantity | NTP  | Resolution | Symmetry Factor | Warning |
|---|-----------|----|----------|---------------------------------------|--------------------------|--------|---------|----------|------|------------|-----------------|---------|
| 1 | Unknown   | 11 | 47.883   | 29088523                              | 314222                   | 49.276 | 53.327  | N/A      | 5789 | 0.987      | N/A             |         |
| 2 | Unknown   | 11 | 50.557   | 29943187                              | 275014                   | 50.724 | 46.673  | N/A      | 4811 | N/A        | N/A             |         |

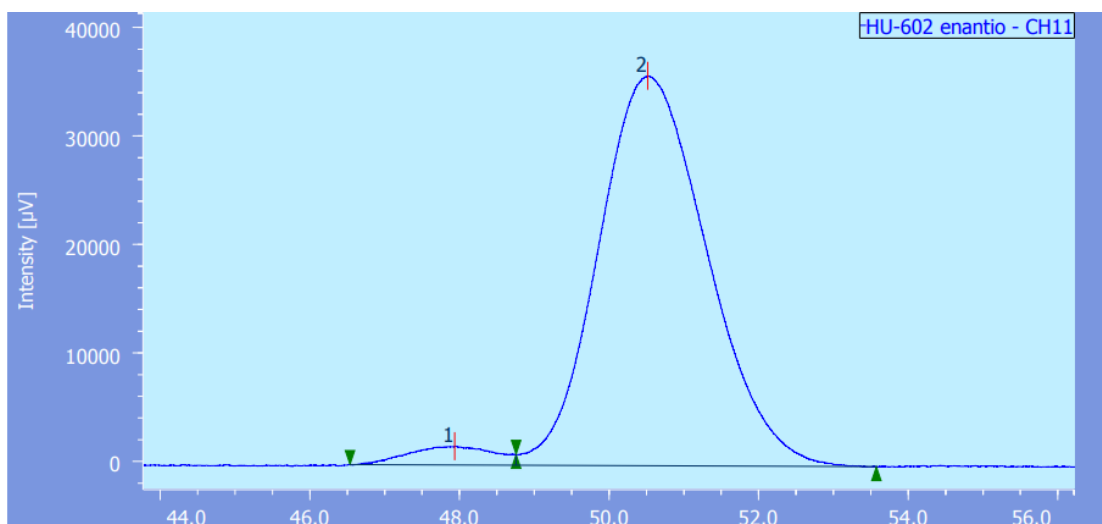

Decision

| # | Peak Name | CH | tR [min] | Area [ $\mu\text{V}\cdot\text{sec}$ ] | Height [ $\mu\text{V}$ ] | Area%  | Height% | Quantity | NTP  | Resolution | Symmetry Factor | Warning |
|---|-----------|----|----------|---------------------------------------|--------------------------|--------|---------|----------|------|------------|-----------------|---------|
| 1 | Unknown   | 11 | 47.933   | 139436                                | 1731                     | 3.712  | 4.598   | N/A      | N/A  | N/A        | N/A             |         |
| 2 | Unknown   | 11 | 50.517   | 3616813                               | 35916                    | 96.288 | 95.402  | N/A      | 5714 | N/A        | 1.139           |         |

**Methyl (*R*)-2-(4-cyanophenyl)-3-cyclohexylpropanoate (66)**

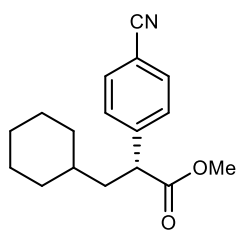

Prepared by **GP-B**. White solid, 42.5 mg, 78% yield. m.p. = 47-48 °C; <sup>1</sup>H NMR (400 MHz, CDCl<sub>3</sub>) δ 7.63 – 7.58 (m, 2H), 7.44 – 7.39 (m, 2H), 3.74 (t, *J* = 7.8 Hz, 1H), 3.66 (s, 3H), 1.97 (ddd, *J* = 13.8, 7.8, 7.4 Hz, 1H), 1.72 – 1.60 (m, 6H), 1.20 – 1.04 (m, 4H), 0.96 – 0.84 (m, 2H); <sup>13</sup>C NMR (101 MHz, CDCl<sub>3</sub>) δ 173.6, 144.7, 132.4, 128.8, 118.7, 111.1, 52.2, 48.8, 40.9, 35.2, 33.2, 32.8, 26.3, 26.00, 25.95. IR (film): ν (cm<sup>-1</sup>) 2917, 2846, 2230, 1730, 1604, 1503, 1449, 1435, 1349, 1278, 1215, 1188, 1156, 1129, 1088, 983, 847, 836, 827, 780, 739, 693, 576, 551; HR-MS (ESI) *m/z* calcd for C<sub>17</sub>H<sub>21</sub>NNaO<sub>2</sub><sup>+</sup> [M+Na<sup>+</sup>] 294.14645, found 294.14632; [α]<sub>D</sub><sup>24.1</sup> = -55.3 (c = 0.1, CHCl<sub>3</sub>); HPLC conditions: Chiral-NR column, hexane/2-propanol = 95/5, flow rate = 1.0 mL/min, λ = 230 nm, t<sub>R</sub> = 17.5 min (minor), t<sub>R</sub> = 22.4 min (major), 92:8 er.

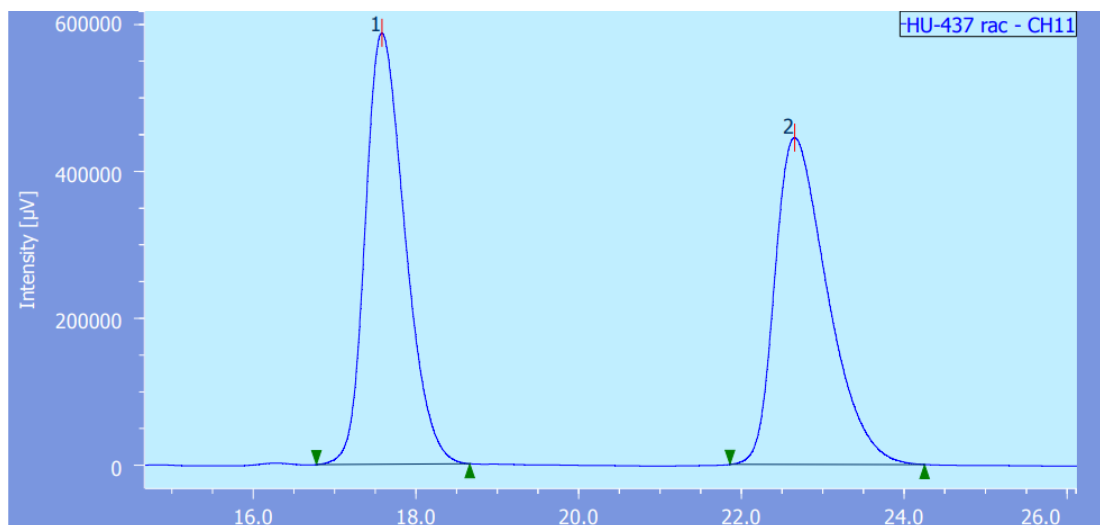

Decision

| # | Peak Name | CH | tR [min] | Area [µV·sec] | Height [µV] | Area%  | Height% | Quantity | NTP  | Resolution | Symmetry Factor | Warning |
|---|-----------|----|----------|---------------|-------------|--------|---------|----------|------|------------|-----------------|---------|
| 1 | Unknown   | 11 | 17.580   | 19899397      | 586832      | 49.879 | 56.880  | N/A      | 6283 | 4.933      | 1.289           |         |
| 2 | Unknown   | 11 | 22.650   | 19995787      | 444865      | 50.121 | 43.120  | N/A      | 5958 | N/A        | 1.517           |         |

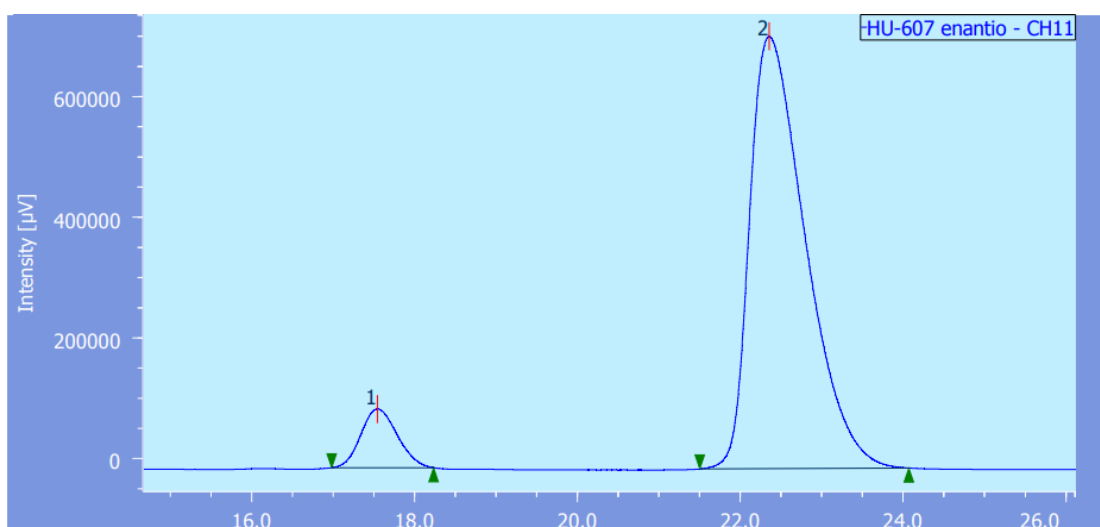

Decision

| # | Peak Name | CH | tR [min] | Area [µV·sec] | Height [µV] | Area%  | Height% | Quantity | NTP  | Resolution | Symmetry Factor | Warning |
|---|-----------|----|----------|---------------|-------------|--------|---------|----------|------|------------|-----------------|---------|
| 1 | Unknown   | 11 | 17.543   | 3036790       | 97338       | 8.185  | 11.963  | N/A      | 7079 | 4.631      | 1.139           |         |
| 2 | Unknown   | 11 | 22.353   | 34066758      | 716329      | 91.815 | 88.037  | N/A      | 5127 | N/A        | 1.642           |         |

**Diethyl (R)-(1-(4-cyanophenyl)-4-hydroxy-3,3,4-trimethylpentyl)phosphonate (67)**

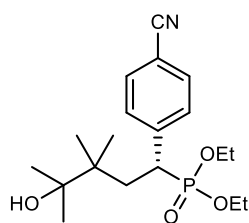

Prepared by **GP-A**. Colorless oil, 31.8 mg, 43% yield.  $^1\text{H NMR}$  (400 MHz,  $\text{CDCl}_3$ )  $\delta$  7.63 – 7.55 (m, 2H), 7.51 – 7.43 (m, 2H), 4.14 – 3.99 (m, 2H), 3.94 – 3.84 (m, 1H), 3.80 – 3.68 (m, 1H), 3.51 (ddd,  $J = 25.3, 9.4, 1.2$  Hz, 1H), 2.38 (ddd,  $J = 17.8, 14.7, 1.4$  Hz, 1H), 2.05 – 1.94 (m, 1H), 1.63 (br s, 1H), 1.27 (t,  $J = 7.1$  Hz, 3H), 1.23 (s, 3H), 1.14 (s, 3H), 1.10 (t,  $J = 7.1$  Hz, 3H), 0.85 (s, 3H), 0.60 (s, 3H);  $^{13}\text{C NMR}$  (101 MHz,  $\text{CDCl}_3$ )  $\delta$  144.9 (d,  $J = 8.1$  Hz), 132.0 (d,  $J = 3.1$  Hz), 130.3 (d,  $J = 6.9$  Hz), 118.8 (d,  $J = 3.3$  Hz), 110.6 (d,  $J = 3.8$  Hz), 75.48, 62.7 (d,  $J = 7.3$  Hz), 62.2 (d,  $J = 7.3$  Hz), 41.8 (d,  $J = 97.7$  Hz), 41.0 (d,  $J = 24.9$  Hz), 37.1 (d,  $J = 3.3$  Hz), 25.7, 25.4, 24.2, 21.6, 16.3 (d,  $J = 6.1$  Hz), 16.2 (d,  $J = 5.8$  Hz);  $^{31}\text{P NMR}$  (162 MHz,  $\text{CDCl}_3$ )  $\delta$  28.55. IR (film):  $\nu$  ( $\text{cm}^{-1}$ ) 3412, 2977, 2910, 2876, 2227, 1606, 1504, 1474, 1444, 1391, 1377, 1368, 1237, 1163, 1052, 1020, 960, 949, 858, 787, 749, 578; HR-MS (ESI)  $m/z$  calcd for  $\text{C}_{19}\text{H}_{31}\text{NO}_4\text{P}^+$  [ $\text{M}+\text{H}^+$ ] 368.19852, found 368.19854;  $[\alpha]_{\text{D}}^{23.7} = 6.2$  ( $c = 0.1$ ,  $\text{CHCl}_3$ ); HPLC conditions: IC column, hexane/2-propanol = 70/30, flow rate = 1.0 mL/min,  $\lambda = 230$  nm,  $t_{\text{R}} = 12.4$  min (minor),  $t_{\text{R}} = 13.6$  min (major), 98:2 er.

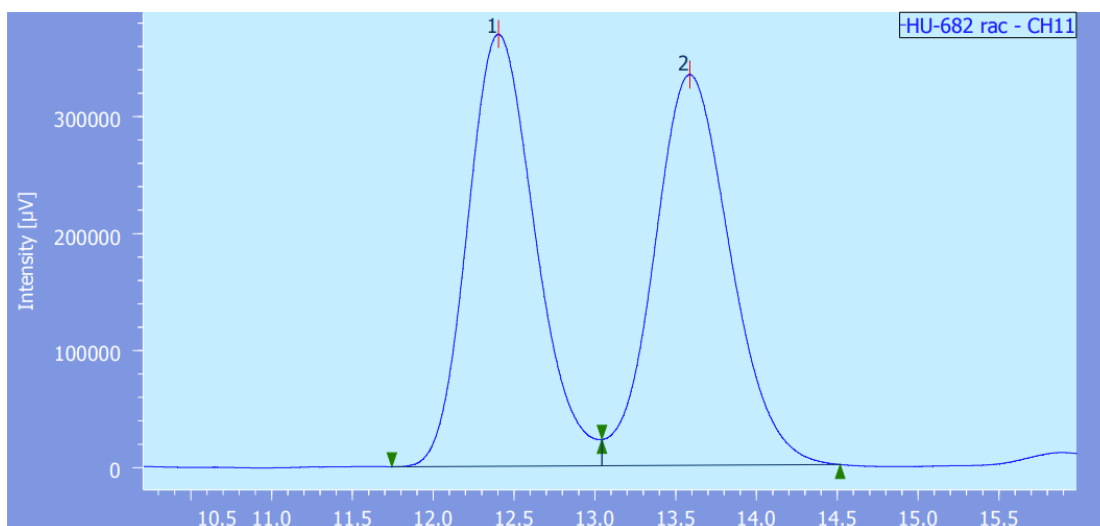

Decision

| # | Peak Name | CH | tR [min] | Area [ $\mu\text{V}\cdot\text{sec}$ ] | Height [ $\mu\text{V}$ ] | Area%  | Height% | Quantity | NTP  | Resolution | Symmetry Factor | Warning |
|---|-----------|----|----------|---------------------------------------|--------------------------|--------|---------|----------|------|------------|-----------------|---------|
| 1 | Unknown   | 11 | 12.403   | 10756243                              | 369117                   | 49.523 | 52.519  | N/A      | 4222 | 1.465      | N/A             |         |
| 2 | Unknown   | 11 | 13.587   | 10963380                              | 333714                   | 50.477 | 47.481  | N/A      | 4032 | N/A        | N/A             |         |

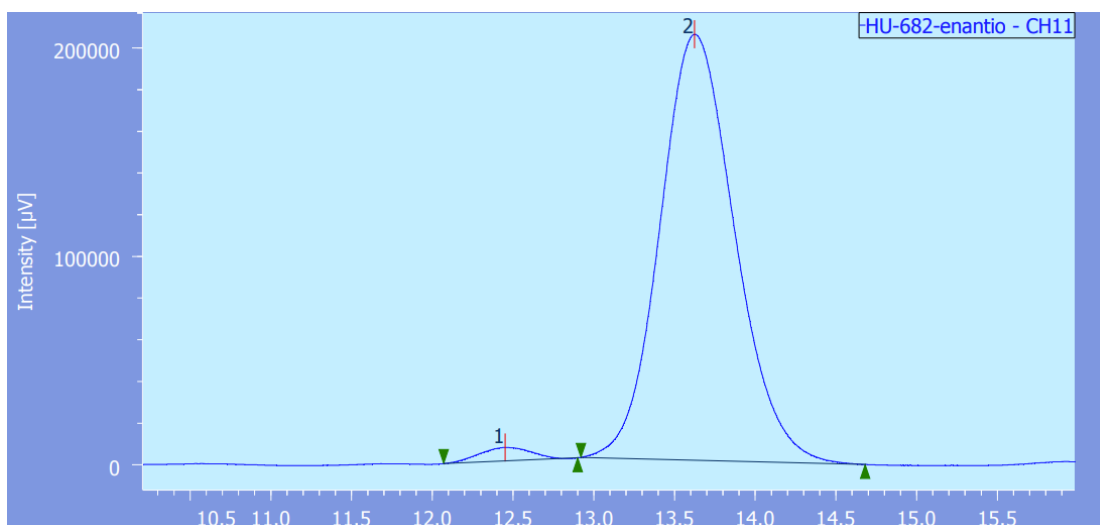

## Decision

| # | Peak Name | CH | tR [min] | Area [ $\mu$ V·sec] | Height [ $\mu$ V] | Area%  | Height% | Quantity | NTP  | Resolution | Symmetry Factor | Warning |
|---|-----------|----|----------|---------------------|-------------------|--------|---------|----------|------|------------|-----------------|---------|
| 1 | Unknown   | 11 | 12.450   | 145207              | 6475              | 2.157  | 3.073   | N/A      | 6235 | 1.598      | 0.977           |         |
| 2 | Unknown   | 11 | 13.623   | 6586974             | 204251            | 97.843 | 96.927  | N/A      | 4190 | N/A        | 1.127           |         |

Diethyl (*R*)-1-(4-cyanophenyl)-3-hydroxy-3-methylbutylphosphonate (68)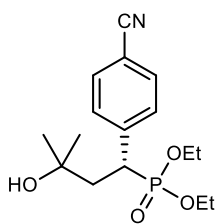

Prepared by GP-C. Colorless oil, 38.8 mg, 60% yield.  $^1\text{H}$  NMR (400 MHz,  $\text{CDCl}_3$ )  $\delta$  7.60 (d,  $J = 8.0$  Hz, 2H), 7.45 (dd,  $J = 8.4, 2.2$  Hz, 2H), 4.12 – 3.83 (m, 4H), 3.45 (ddd,  $J = 24.1, 8.1, 4.2$  Hz, 1H), 2.37 (dt,  $J = 15.2, 4.0$  Hz, 1H), 2.24 (br s, 1H), 2.09 (ddd,  $J = 14.7, 11.3, 8.2$  Hz, 1H), 1.26 (t,  $J = 7.1$  Hz, 3H), 1.21 (s, 3H), 1.17 (t,  $J = 7.1$  Hz, 3H), 1.05 (s, 3H);  $^{13}\text{C}$  NMR (101 MHz,  $\text{CDCl}_3$ )  $\delta$  144.1 (d,  $J = 8.0$  Hz), 132.2 (d,  $J = 2.8$  Hz), 130.1 (d,  $J = 6.6$  Hz), 118.7 (d,  $J = 2.0$  Hz), 110.8 (d,  $J = 3.5$  Hz), 70.4 (d,  $J = 11.4$  Hz), 62.9 (d,  $J = 7.3$  Hz), 62.4 (d,  $J = 7.3$  Hz), 43.2 (d,  $J = 3.4$  Hz), 40.8 (d,  $J = 136.8$  Hz), 30.9, 28.8, 16.30 (d,  $J = 11.8$  Hz), 16.29;  $^{31}\text{P}$  NMR (162 MHz,  $\text{CDCl}_3$ )  $\delta$  28.08. IR (film):  $\nu$  ( $\text{cm}^{-1}$ ) 3411, 2975, 2930, 2909, 2228, 1605, 1505, 1391, 1236, 1155, 1052, 1020, 960, 911, 860, 788, 578; HR-MS (ESI)  $m/z$  calcd for  $\text{C}_{16}\text{H}_{25}\text{NO}_4\text{P}^+$  [ $\text{M}+\text{H}^+$ ] 326.15157, found 326.15192;  $[\alpha]_{\text{D}}^{24.2} = -8.2$  ( $c = 0.1$ ,  $\text{CHCl}_3$ ); HPLC conditions: IC column, hexane/2-propanol = 70/30, flow rate = 1.0 mL/min,  $\lambda = 230$  nm,  $t_{\text{R}} = 14.3$  min (minor),  $t_{\text{R}} = 17.8$  min (major), 96:4 er.

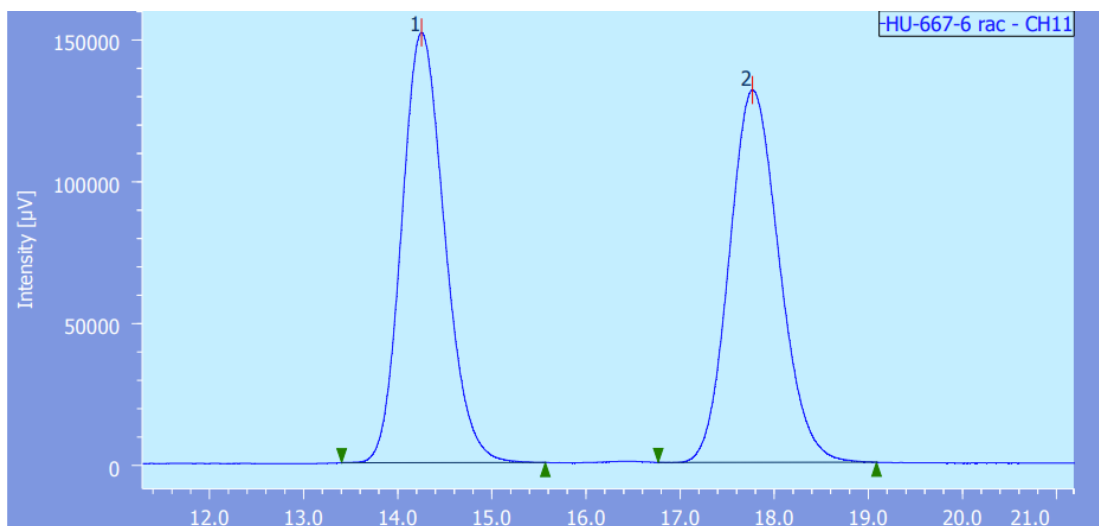

## Decision

| # | Peak Name | CH | tR [min] | Area [ $\mu$ V·sec] | Height [ $\mu$ V] | Area%  | Height% | Quantity | NTP  | Resolution | Symmetry Factor | Warning |
|---|-----------|----|----------|---------------------|-------------------|--------|---------|----------|------|------------|-----------------|---------|
| 1 | Unknown   | 11 | 14.253   | 4811209             | 151513            | 49.828 | 53.591  | N/A      | 4693 | 3.904      | 1.161           |         |
| 2 | Unknown   | 11 | 17.767   | 4844445             | 131208            | 50.172 | 46.409  | N/A      | 5343 | N/A        | 1.140           |         |

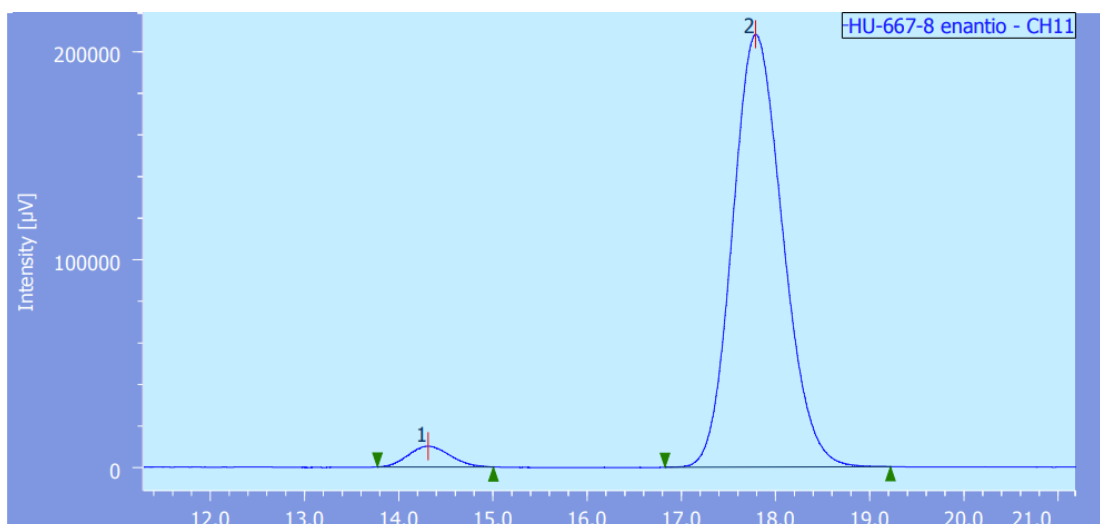

Decision

| # | Peak Name | CH | tR [min] | Area [µV·sec] | Height [µV] | Area%  | Height% | Quantity | NTP  | Resolution | Symmetry Factor | Warning |
|---|-----------|----|----------|---------------|-------------|--------|---------|----------|------|------------|-----------------|---------|
| 1 | Unknown   | 11 | 14.310   | 310826        | 10034       | 3.880  | 4.604   | N/A      | 4750 | 3.858      | 1.115           |         |
| 2 | Unknown   | 11 | 17.787   | 7700649       | 207893      | 96.120 | 95.396  | N/A      | 5308 | N/A        | 1.150           |         |

**(R)-4-(1-Cyclohexyl-3-oxopentan-2-yl)benzotrile (69)**

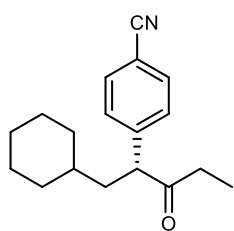

Prepared by **GP-B**. Colorless oil, 38.5 mg, 71% yield. <sup>1</sup>H NMR (400 MHz, CDCl<sub>3</sub>) δ 7.64 – 7.56 (m, 2H), 7.37 – 7.31 (m, 2H), 3.86 (t, *J* = 7.5 Hz, 1H), 2.44 – 2.36 (m, 2H), 1.92 (dt, *J* = 14.4, 7.3 Hz, 1H), 1.73 – 1.54 (m, 6H), 1.16 – 1.06 (m, 3H), 1.05 – 1.00 (m, 1H), 0.97 (t, *J* = 7.2 Hz, 3H), 0.92 – 0.80 (m, 2H); <sup>13</sup>C NMR (101 MHz, CDCl<sub>3</sub>) δ 209.9, 144.9, 132.5, 129.0, 118.6, 111.0, 55.7, 40.0, 35.6, 35.1, 33.6, 32.8, 26.3, 26.02, 25.96, 7.7. IR

(film): ν (cm<sup>-1</sup>) 2976, 2923, 2849, 2227, 1715, 1606, 1504, 1449, 1410, 1351, 1107, 1020, 847, 827, 578, 550; HR-MS (ESI) *m/z* calcd for C<sub>18</sub>H<sub>23</sub>NNaO<sup>+</sup> [M+Na<sup>+</sup>] 292.16719, found 292.16692; [α]<sub>D</sub><sup>24.1</sup> = -140.7 (c = 0.1, CHCl<sub>3</sub>); HPLC conditions: IC column, hexane/2-propanol = 95/5, flow rate = 1.0 mL/min, λ = 230 nm, t<sub>R</sub> = 14.9 min (minor), t<sub>R</sub> = 17.1 min (major), 81:19 er.

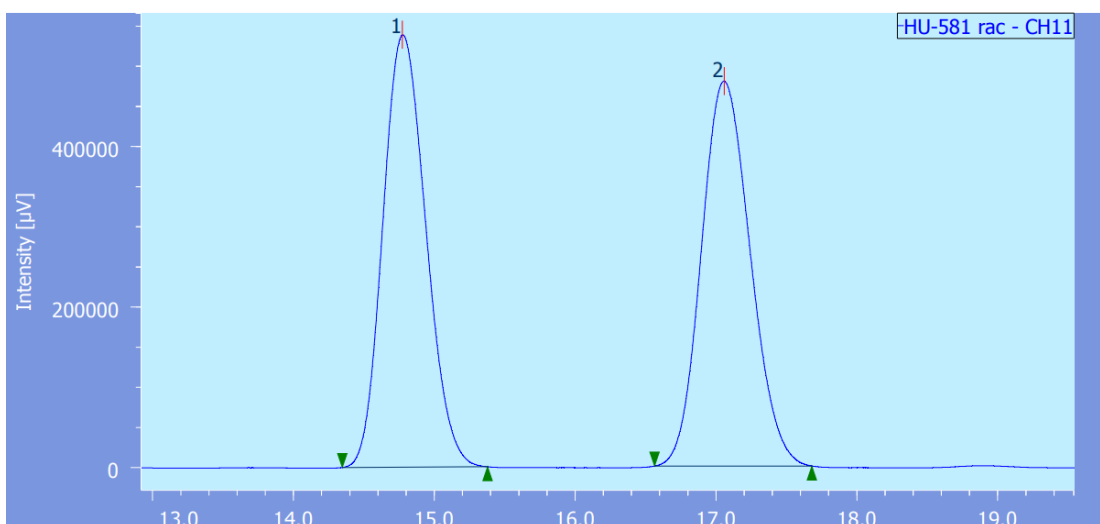

Decision

| # | Peak Name | CH | tR [min] | Area [µV·sec] | Height [µV] | Area%  | Height% | Quantity | NTP   | Resolution | Symmetry Factor | Warning |
|---|-----------|----|----------|---------------|-------------|--------|---------|----------|-------|------------|-----------------|---------|
| 1 | Unknown   | 11 | 14.773   | 11410108      | 538396      | 49.666 | 52.899  | N/A      | 10872 | 3.785      | 1.157           |         |
| 2 | Unknown   | 11 | 17.057   | 11563792      | 479381      | 50.334 | 47.101  | N/A      | 11257 | N/A        | 1.126           |         |



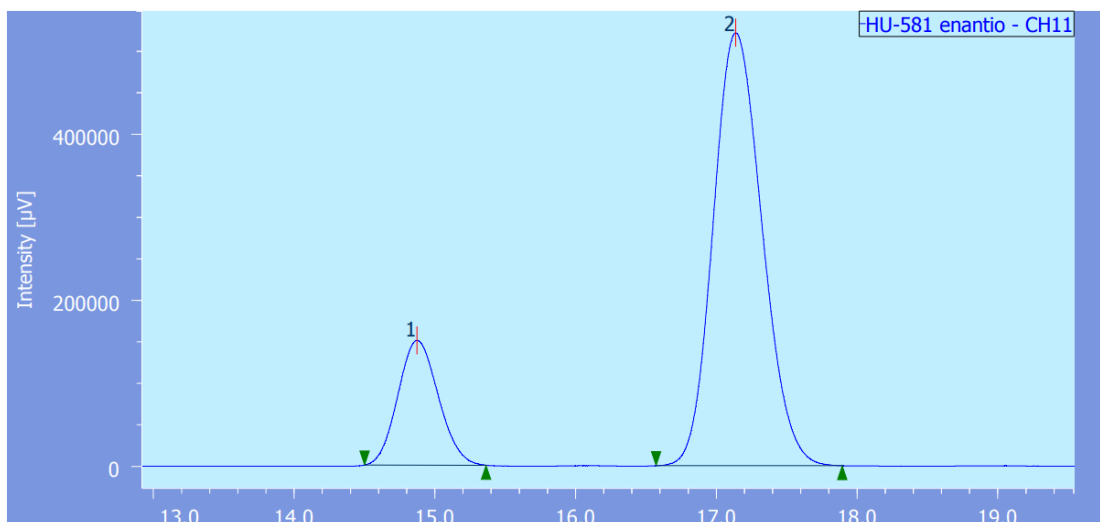

Decision

| # | Peak Name | CH | tR [min] | Area [µV·sec] | Height [µV] | Area%  | Height% | Quantity | NTP   | Resolution | Symmetry Factor | Warning |
|---|-----------|----|----------|---------------|-------------|--------|---------|----------|-------|------------|-----------------|---------|
| 1 | Unknown   | 11 | 14.873   | 2997434       | 150078      | 19.214 | 22.356  | N/A      | 12469 | 3.862      | 1.103           |         |
| 2 | Unknown   | 11 | 17.137   | 12602424      | 521242      | 80.786 | 77.644  | N/A      | 11384 | N/A        | 1.143           |         |

**(R)-N-(tert-Butyl)-2-(4-cyanophenyl)-3-cyclohexylpropanamide (70)**

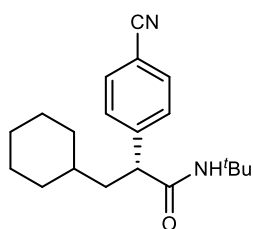

Prepared by GP-A. White solid, 38.0 mg, 61% yield. m.p. = 80-81 °C; <sup>1</sup>H NMR (400 MHz, CDCl<sub>3</sub>) δ 7.61 – 7.55 (m, 2H), 7.46 – 7.40 (m, 2H), 5.36 (s, 1H), 3.37 (t, *J* = 7.7 Hz, 1H), 2.00 – 1.88 (m, 1H), 1.74 – 1.52 (m, 6H), 1.27 (s, 9H), 1.18 – 1.05 (m, 4H), 0.96 – 0.82 (m, 2H); <sup>13</sup>C NMR (101 MHz, CDCl<sub>3</sub>) δ 171.4, 146.4, 132.3, 128.5, 118.8, 110.6, 51.4, 51.2, 41.3, 35.2, 33.3, 32.9, 28.6, 26.3, 26.05, 25.97. IR (film): ν (cm<sup>-1</sup>) 3335, 2972, 2924, 2903, 2845, 2226, 1641, 1538, 1449, 1362, 1224, 969, 904, 851, 838, 688, 651, 637, 578, 552, 493; HR-MS (ESI) *m/z* calcd for C<sub>20</sub>H<sub>29</sub>N<sub>2</sub>O<sup>+</sup> [M+H<sup>+</sup>] 313.22744, found 313.22742; [α]<sub>D</sub><sup>24.1</sup> = 5.8 (c = 0.1, CHCl<sub>3</sub>); HPLC conditions: IC column, hexane/2-propanol = 90/10, flow rate = 1.0 mL/min, λ = 240 nm, t<sub>R</sub> = 12.8 min (major), t<sub>R</sub> = 15.3 min (minor), 63:37 er.

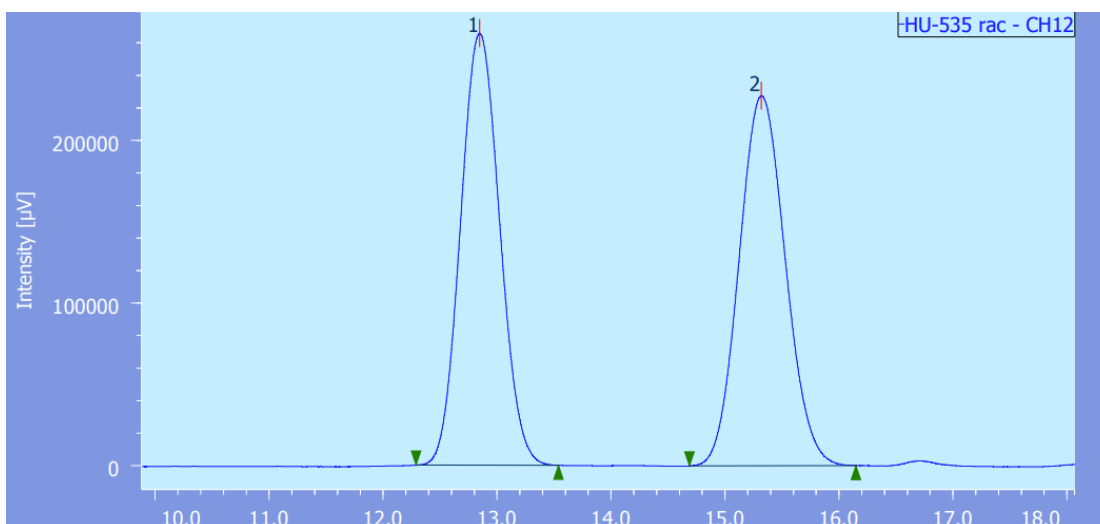

Decision

| # | Peak Name | CH | tR [min] | Area [µV·sec] | Height [µV] | Area%  | Height% | Quantity | NTP  | Resolution | Symmetry Factor | Warning |
|---|-----------|----|----------|---------------|-------------|--------|---------|----------|------|------------|-----------------|---------|
| 1 | Unknown   | 12 | 12.847   | 6342205       | 265478      | 49.719 | 53.853  | N/A      | 6464 | 3.565      | 1.073           |         |
| 2 | Unknown   | 12 | 15.317   | 6413992       | 227488      | 50.281 | 46.147  | N/A      | 6666 | N/A        | 1.090           |         |

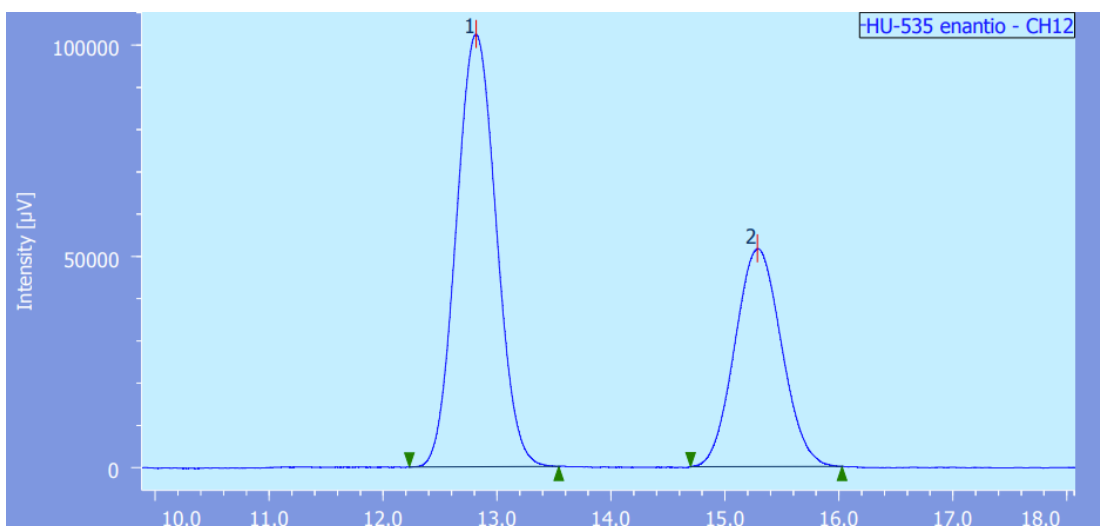

Decision

| # | Peak Name | CH | tR [min] | Area [µV-sec] | Height [µV] | Area%  | Height% | Quantity | NTP  | Resolution | Symmetry Factor | Warning |
|---|-----------|----|----------|---------------|-------------|--------|---------|----------|------|------------|-----------------|---------|
| 1 | Unknown   | 12 | 12.817   | 2493016       | 102362      | 62.929 | 66.486  | N/A      | 6190 | 3.503      | 1.052           |         |
| 2 | Unknown   | 12 | 15.283   | 1468646       | 51599       | 37.071 | 33.514  | N/A      | 6462 | N/A        | 1.073           |         |

**(S)-4-(2-Cyclohexyl-1-phenylethyl)-1,1'-biphenyl (71)**

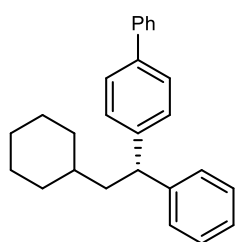

Prepared by **GP-B** (two 40 W 390 nm Kessile lamps were used). White solid, 23.3 mg, 34% yield. m.p. = 75-76 °C; <sup>1</sup>H NMR (400 MHz, CDCl<sub>3</sub>) δ 7.61 – 7.55 (m, 2H), 7.54 – 7.49 (m, 2H), 7.45 – 7.39 (m, 2H), 7.35 – 7.27 (m, 7H), 7.22 – 7.17 (m, 1H), 4.13 (t, *J* = 8.0 Hz, 1H), 2.05 – 1.93 (m, 2H), 1.86 – 1.76 (m, 2H), 1.72 – 1.60 (m, 3H), 1.25 – 1.12 (m, 4H), 1.04 – 0.93 (m, 2H); <sup>13</sup>C NMR (101 MHz, CDCl<sub>3</sub>) δ 145.3, 144.6, 141.0, 138.8, 128.7, 128.4, 128.2, 127.9, 127.1, 126.99, 126.96, 126.0, 47.6, 43.6, 34.9, 33.45, 33.39,

26.6, 26.1. IR (film): ν (cm<sup>-1</sup>) 3057, 3025, 2919, 2907, 2850, 2838, 1600, 1485, 1446, 1408, 1262, 1167, 1111, 1071, 1033, 1008, 965, 907, 890, 846, 829, 773, 756, 729, 714, 695, 596, 578, 494, 478; HR-MS (EI) *m/z* calcd for [C<sub>26</sub>H<sub>28</sub>]<sup>+</sup> [M]<sup>+</sup> 340.21910, found 340.21891; [α]<sub>D</sub><sup>22.3</sup> = 11.9 (c = 0.1, CHCl<sub>3</sub>); HPLC conditions: AD-H column, hexane/2-propanol = 98/2, flow rate = 0.2 mL/min, λ = 254 nm, t<sub>R</sub> = 23.5 min (minor), t<sub>R</sub> = 25.8 min (major), 98:2 er.

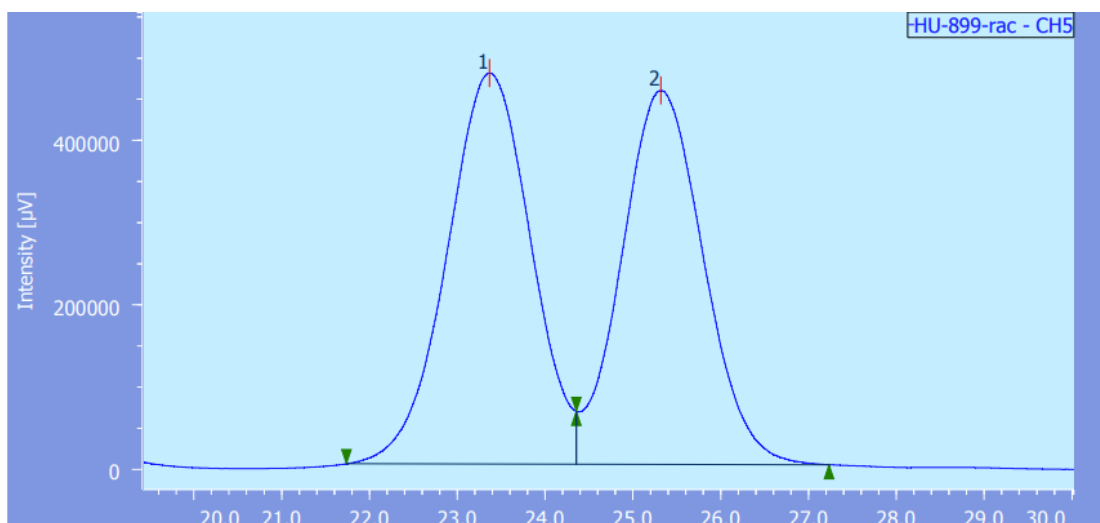

## Decision

| # | Peak Name | CH | tR [min] | Area [ $\mu\text{V}\cdot\text{sec}$ ] | Height [ $\mu\text{V}$ ] | Area%  | Height% | Quantity | NTP  | Resolution | Symmetry Factor | Warning |
|---|-----------|----|----------|---------------------------------------|--------------------------|--------|---------|----------|------|------------|-----------------|---------|
| 1 | Unknown   | 5  | 23.367   | 31449400                              | 474936                   | 51.510 | 51.114  | N/A      | 2834 | 1.125      | N/A             |         |
| 2 | Unknown   | 5  | 25.317   | 29605646                              | 454229                   | 48.490 | 48.886  | N/A      | 3464 | N/A        | N/A             |         |

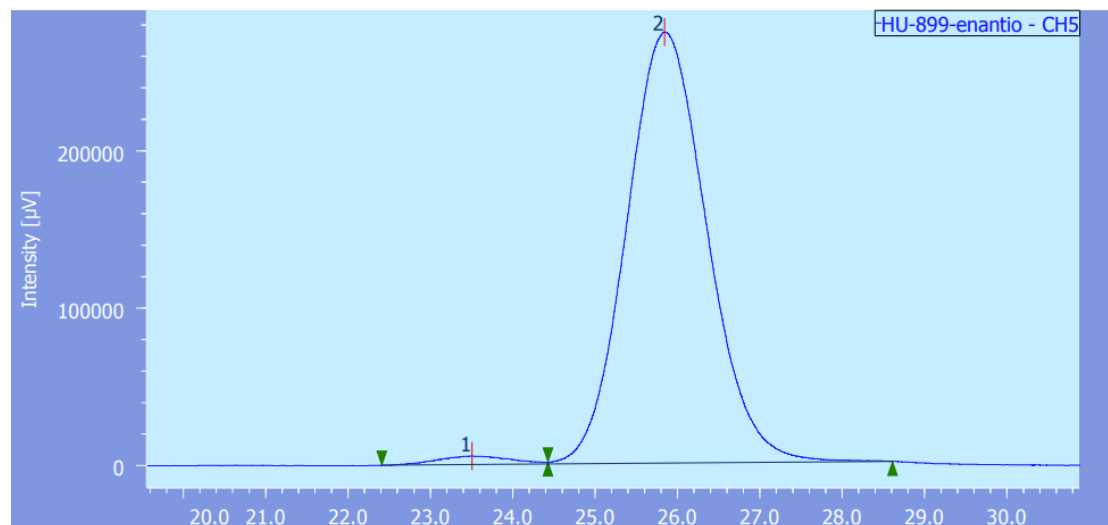

## Decision

| # | Peak Name | CH | tR [min] | Area [ $\mu\text{V}\cdot\text{sec}$ ] | Height [ $\mu\text{V}$ ] | Area%  | Height% | Quantity | NTP  | Resolution | Symmetry Factor | Warning |
|---|-----------|----|----------|---------------------------------------|--------------------------|--------|---------|----------|------|------------|-----------------|---------|
| 1 | Unknown   | 5  | 23.503   | 336142                                | 5343                     | 1.778  | 1.915   | N/A      | 3043 | 1.344      | N/A             |         |
| 2 | Unknown   | 5  | 25.840   | 18571070                              | 273724                   | 98.222 | 98.085  | N/A      | 3366 | N/A        | 1.107           |         |

**(S)-4-(1-(4-(*tert*-Butyl)phenyl)-2-cyclohexylethyl)-1,1'-biphenyl (72)**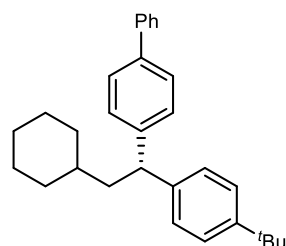

Prepared by **GP-B** (two 40 W 390 nm Kessile lamps were used). White solid, 30.8 mg, 39% yield. m.p. = 80-81 °C;  $^1\text{H}$  NMR (400 MHz,  $\text{CDCl}_3$ )  $\delta$  7.61 – 7.55 (m, 2H), 7.54 – 7.49 (m, 2H), 7.46 – 7.38 (m, 2H), 7.36 – 7.28 (m, 5H), 7.24 – 7.18 (m, 2H), 4.09 (t,  $J = 7.9$  Hz, 1H), 2.03 – 1.89 (m, 2H), 1.87 – 1.74 (m, 2H), 1.72 – 1.59 (m, 3H), 1.31 (s, 9H), 1.25 – 1.11 (m, 4H), 1.04 – 0.91 (m, 2H);  $^{13}\text{C}$  NMR (101 MHz,  $\text{CDCl}_3$ )  $\delta$  148.6, 144.8, 142.4, 141.0, 138.7, 128.6, 128.3, 127.4, 127.1, 127.0, 125.3, 47.2, 43.7, 34.8, 34.3, 33.6, 33.2, 31.4, 26.6, 26.1. IR (film):  $\nu$  ( $\text{cm}^{-1}$ ) 3027, 2963, 2920, 2849, 2360, 2333, 1510, 1487, 1446, 1408, 1360, 1269, 1133, 1111, 1017, 1007, 848, 841, 830, 819, 763, 748, 727, 693, 606, 583, 565, 546, 483, 455, 431; HR-MS (EI)  $m/z$  calcd for  $[\text{C}_{30}\text{H}_{36}]^+ [\text{M}]^+$  396.28170, found 396.28174;  $[\alpha]_{\text{D}}^{22.7} = -9.3$  ( $c = 0.1$ ,  $\text{CHCl}_3$ ); HPLC conditions (Reverse Phase HPLC): Chiralpak IA column,  $\text{H}_2\text{O}/\text{MeCN} = 25/75$ , flow rate = 0.2 mL/min,  $\lambda = 254$  nm,  $t_{\text{R}} = 147.5$  min (major),  $t_{\text{R}} = 154.3$  min (minor), 97:3 er (Note: approximate er value is provided).

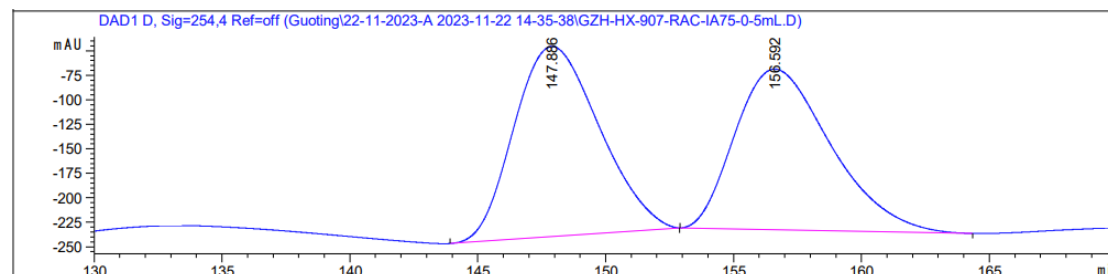

| Peak # | RetTime [min] | Type | Width [min] | Area [mAU*s] | Height [mAU] | Area %  |
|--------|---------------|------|-------------|--------------|--------------|---------|
| 1      | 147.886       | BB   | 3.5428      | 4.49460e4    | 194.00752    | 51.3385 |
| 2      | 156.592       | BB   | 3.7864      | 4.26023e4    | 163.90739    | 48.6615 |

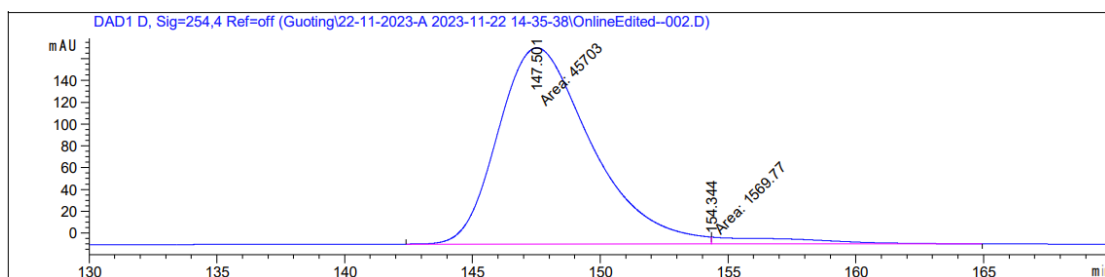

| Peak # | RetTime [min] | Type | Width [min] | Area [mAU*s] | Height [mAU] | Area %  |
|--------|---------------|------|-------------|--------------|--------------|---------|
| 1      | 147.501       | MF   | 4.2340      | 4.57030e4    | 179.90648    | 96.6793 |
| 2      | 154.344       | FM   | 4.1888      | 1569.76709   | 6.24594      | 3.3207  |

**(R)-4-(2-Cyclohexyl-1-(4-fluorophenyl)ethyl)-1,1'-biphenyl (73)**

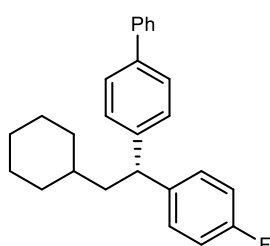

Prepared by **GP-B** (two 40 W 390 nm Kessile lamps were used). White solid, 25.8 mg, 36% yield. m.p. = 77-78 °C; <sup>1</sup>H NMR (400 MHz, CDCl<sub>3</sub>) δ 7.60 – 7.55 (m, 2H), 7.54 – 7.50 (m, 2H), 7.45 – 7.40 (m, 2H), 7.35 – 7.27 (m, 3H), 7.25 – 7.20 (m, 2H), 7.02 – 6.95 (m, 2H), 4.10 (t, *J* = 8.0 Hz, 1H), 1.98 – 1.89 (m, 2H), 1.83 – 1.75 (m, 2H), 1.72 – 1.60 (m, 3H), 1.23 – 1.10 (m, 4H), 1.04 – 0.92 (m, 2H); <sup>19</sup>F NMR (377 MHz, CDCl<sub>3</sub>) δ -117.34; <sup>13</sup>C NMR (101 MHz, CDCl<sub>3</sub>) δ 161.2 (d, *J* = 244.8 Hz), 144.4,

141.0 (d, *J* = 3.1 Hz), 140.9, 139.0, 129.25, 129.17, 128.7, 128.1, 127.2, 127.1, 127.0, 115.2 (d, *J* = 21.1 Hz), 46.9, 43.7, 34.8, 33.5, 33.3, 26.6, 26.1. IR (film): ν (cm<sup>-1</sup>) 3066, 3026, 2918, 2907, 2847, 2838, 1738, 1601, 1507, 1485, 1445, 1224, 1159, 1075, 1008, 824, 767, 742, 694, 578, 566, 522, 502, 416; HR-MS (EI) *m/z* calcd for [C<sub>26</sub>H<sub>27</sub>F]<sup>+</sup> [M]<sup>+</sup> 358.20968, found 358.20949; [α]<sub>D</sub><sup>22.8</sup> = 4.4 (c = 0.1, CHCl<sub>3</sub>); HPLC conditions: NR column, hexane/2-propanol = 98/2, flow rate = 0.2 mL/min, λ = 254 nm, t<sub>R</sub> = 26.2 min (minor), t<sub>R</sub> = 28.5 min (major), 97:3 er.

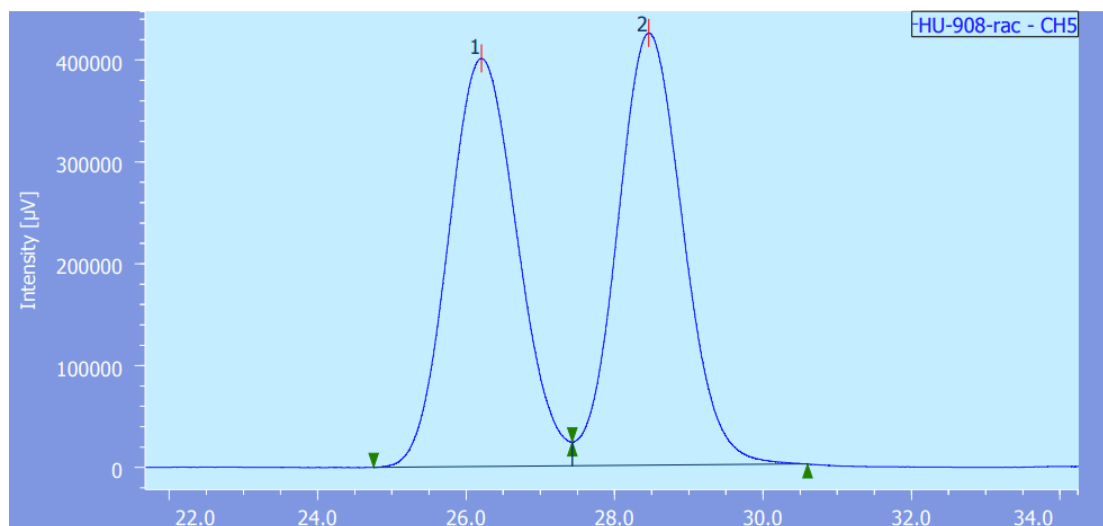

**Decision**

| # | Peak Name | CH | tR [min] | Area [µV-sec] | Height [µV] | Area%  | Height% | Quantity | NTP  | Resolution | Symmetry Factor | Warning |
|---|-----------|----|----------|---------------|-------------|--------|---------|----------|------|------------|-----------------|---------|
| 1 | Unknown   | 5  | 26.203   | 25788888      | 400307      | 49.718 | 48.567  | N/A      | 3693 | 1.353      |                 | N/A     |
| 2 | Unknown   | 5  | 28.460   | 26081776      | 423927      | 50.282 | 51.433  | N/A      | 4945 | N/A        |                 | N/A     |

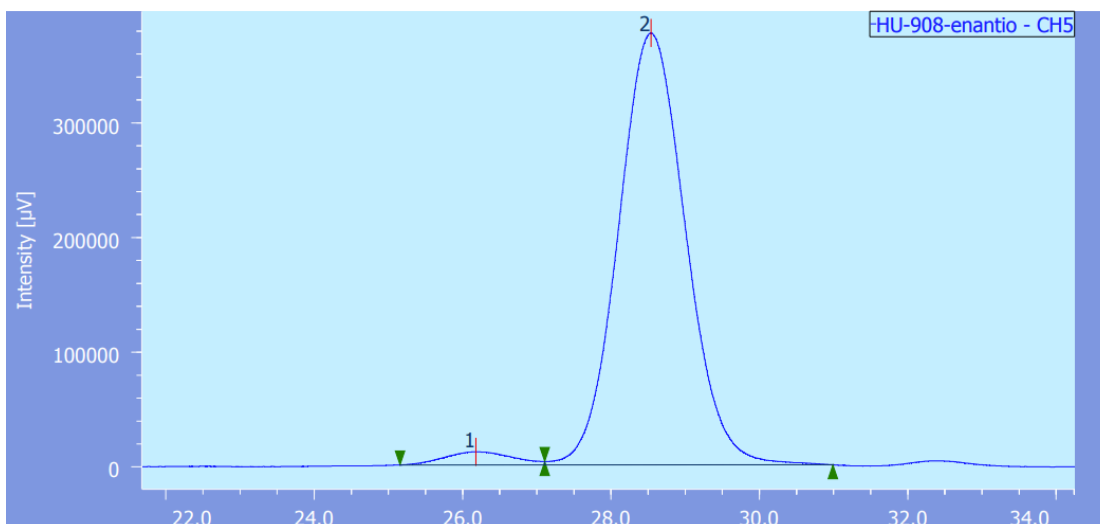

Decision

| # | Peak Name | CH | tR [min] | Area [µV·sec] | Height [µV] | Area%  | Height% | Quantity | NTP  | Resolution | Symmetry Factor | Warning |
|---|-----------|----|----------|---------------|-------------|--------|---------|----------|------|------------|-----------------|---------|
| 1 | Unknown   | 5  | 26.177   | 727379        | 11455       | 2.981  | 2.954   | N/A      | 3539 | 1.389      | N/A             |         |
| 2 | Unknown   | 5  | 28.537   | 23670320      | 376305      | 97.019 | 97.046  | N/A      | 4800 | N/A        | 1.071           |         |

**(R)-4-(1-(4-Chlorophenyl)-2-cyclohexylethyl)-1,1'-biphenyl (74)**

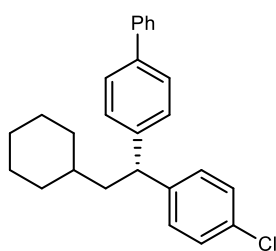

Prepared by **GP-B** (two 40 W 390 nm Kessile lamps were used). Colorless oil, 26.5 mg, 35% yield. <sup>1</sup>H NMR (400 MHz, CDCl<sub>3</sub>) δ 7.51 – 7.46 (m, 2H), 7.45 – 7.40 (m, 2H), 7.36 – 7.30 (m, 2H), 7.26 – 7.16 (m, 5H), 7.14 – 7.09 (m, 2H), 4.00 (t, *J* = 7.9 Hz, 1H), 1.84 (t, *J* = 7.3 Hz, 2H), 1.74 – 1.65 (m, 2H), 1.63 – 1.51 (m, 3H), 1.13 – 1.01 (m, 4H), 0.94 – 0.83 (m, 2H); <sup>13</sup>C NMR (101 MHz, CDCl<sub>3</sub>) δ 144.0, 143.8, 140.8, 139.0, 131.7, 129.2, 128.7, 128.6, 128.1, 127.2, 127.1, 127.0, 47.0, 43.5,

34.8, 33.5, 33.3, 26.6, 26.1. IR (film): ν (cm<sup>-1</sup>) 3026, 2919, 2849, 2361, 1599, 1488, 1448, 1408, 1092, 1012, 942, 909, 892, 845, 820, 762, 740, 696, 577, 527, 508, 496; HR-MS (EI) *m/z* calcd for [C<sub>26</sub>H<sub>27</sub>Cl]<sup>+</sup> [M]<sup>+</sup> 374.18013, found 374.17976; [α]<sub>D</sub><sup>22.8</sup> = -4.8 (c = 0.1, CHCl<sub>3</sub>); HPLC conditions (Reverse Phase HPLC): Chiralpak IA column, H<sub>2</sub>O/MeCN = 25/75, flow rate = 0.2 mL/min, λ = 254 nm, t<sub>R</sub> = 184.0 min (minor), t<sub>R</sub> = 196.4 min (major), 97:3 er.

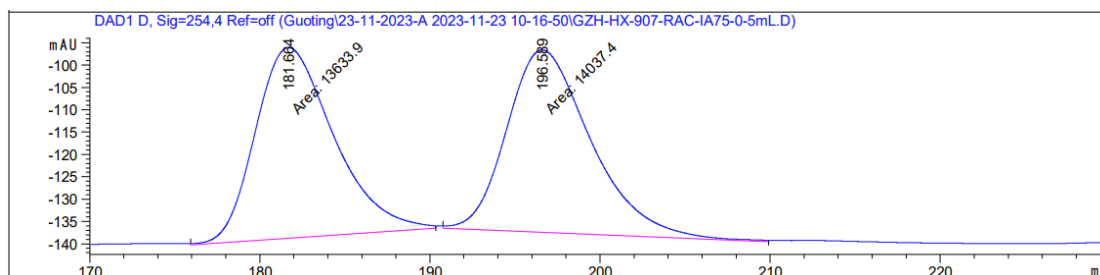

| Peak # | RetTime [min] | Type | Width [min] | Area [mAU*s] | Height [mAU] | Area %  |
|--------|---------------|------|-------------|--------------|--------------|---------|
| 1      | 181.664       | MM   | 5.3249      | 1.36339e4    | 42.67295     | 49.2708 |
| 2      | 196.589       | MM   | 5.7300      | 1.40374e4    | 40.83017     | 50.7292 |

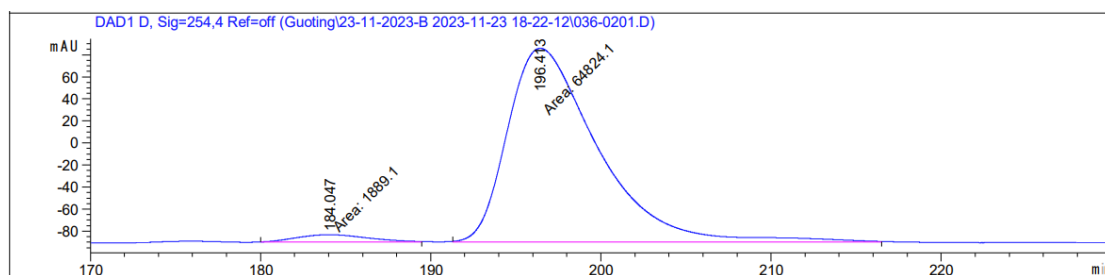

| Peak # | RetTime [min] | Type | Width [min] | Area [mAU*s] | Height [mAU] | Area %  |
|--------|---------------|------|-------------|--------------|--------------|---------|
| 1      | 184.047       | MM   | 4.8023      | 1889.09729   | 6.55622      | 2.8317  |
| 2      | 196.413       | MM   | 6.1470      | 6.48241e4    | 175.75975    | 97.1683 |

**(R)-4-(2-Cyclohexyl-1-(4-(trifluoromethyl)phenyl)ethyl)-1,1'-biphenyl (75)**

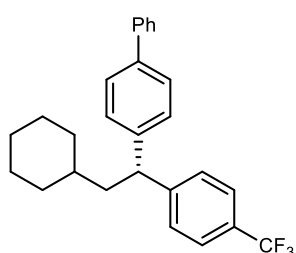

Prepared by **GP-B** (two 40 W 390 nm Kessile lamps were used). Colorless oil, 34.3 mg, 42% yield. <sup>1</sup>H NMR (400 MHz, CDCl<sub>3</sub>) δ 7.60 – 7.51 (m, 6H), 7.46 – 7.37 (m, 4H), 7.36 – 7.28 (m, 3H), 4.18 (t, *J* = 7.9 Hz, 1H), 2.05 – 1.91 (m, 2H), 1.84 – 1.76 (m, 2H), 1.74 – 1.60 (m, 3H), 1.25 – 1.10 (m, 4H), 1.05 – 0.93 (m, 2H); <sup>19</sup>F NMR (377 MHz, CDCl<sub>3</sub>) δ -62.28; <sup>13</sup>C NMR (101 MHz, CDCl<sub>3</sub>) δ 149.5, 143.4, 140.8, 139.3, 128.7, 128.6 (q, *J* = 5.2 Hz),

128.20, 128.18, 127.3, 127.2, 127.0, 125.4 (q, *J* = 3.7 Hz), 125.3 (q, *J* = 136.5 Hz), 47.6, 43.4, 34.8, 33.4, 33.4, 26.6, 26.1. IR (film): ν (cm<sup>-1</sup>) 3054, 3032, 2923, 2852, 2358, 1615, 1488, 1448, 1418, 1322, 1159, 1118, 1111, 1066, 1016, 1009, 848, 835, 824, 771, 754, 726, 696, 613, 590, 519, 495, 420; HR-MS (EI) *m/z* calcd for [C<sub>27</sub>H<sub>27</sub>F<sub>3</sub>]<sup>+</sup> [M]<sup>+</sup> 408.20649, found 408.20646; [α]<sub>D</sub><sup>22.7</sup> = 7.5 (c = 0.1, CHCl<sub>3</sub>); HPLC conditions (Reverse Phase HPLC): Chiralpak IA column, H<sub>2</sub>O/MeCN = 25/75, flow rate = 0.2 mL/min, λ = 254 nm, t<sub>R</sub> = 127.7 min (minor), t<sub>R</sub> = 141.2 min (major), 97:3 er.

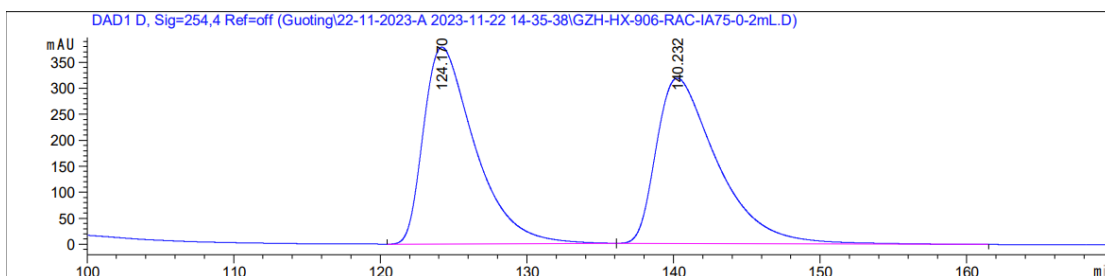

| Peak # | RetTime [min] | Type | Width [min] | Area [mAU*s] | Height [mAU] | Area %  |
|--------|---------------|------|-------------|--------------|--------------|---------|
| 1      | 124.170       | BB   | 3.4979      | 9.21235e4    | 378.72668    | 50.0277 |
| 2      | 140.232       | BB   | 4.1475      | 9.20215e4    | 318.05643    | 49.9723 |

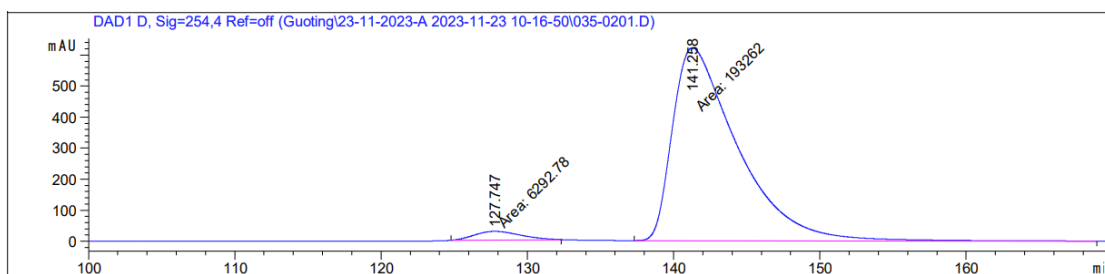

| Peak # | RetTime [min] | Type | Width [min] | Area [mAU*s] | Height [mAU] | Area %  |
|--------|---------------|------|-------------|--------------|--------------|---------|
| 1      | 127.747       | MM   | 3.6772      | 6292.77783   | 28.52137     | 3.1534  |
| 2      | 141.258       | MM   | 5.1767      | 1.93262e5    | 622.22205    | 96.8466 |

## Experimental Procedures and Characterization Data for Synthetic Applications.

### 4-((*S*)-2-((*tert*-Butoxycarbonyl)amino)-3-methoxy-3-oxopropyl)phenyl (*R*)-3-cyclohexyl-2-(4-(methylsulfonyl)phenyl)propanoate (76)

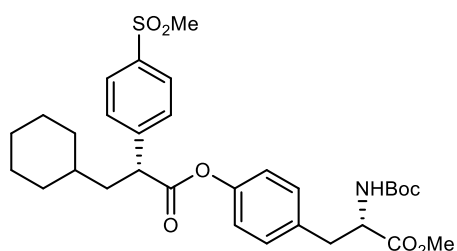

An oven-dried vial was charged with *tert*-butyl (*R*)-3-cyclohexyl-2-(4-(methylsulfonyl)phenyl)propanoate (0.13 mmol, 1.3 equiv) and CH<sub>2</sub>Cl<sub>2</sub> (4 mL). TFA (1 mmol, 10 equiv) was added dropwise to the mixture at 0 °C. The reaction was stirred at 25 °C until TLC shows complete consumption of starting material. After reaction was complete, the solvent was evaporated

under reduced pressure. The crude acid was dissolved in anhydrous CH<sub>2</sub>Cl<sub>2</sub> (3 mL), then Boc-Tyr-OMe (0.1 mmol, 1.0 equiv), DCC (0.12 mmol, 1.2 equiv), and DMAP (0.01 mmol, 0.1 equiv) were added under N<sub>2</sub> atmosphere. The resulting reaction mixture was stirred for 2 h at 25 °C. After this time, 2 M NaOH (aq) was added, and the aqueous phase was extracted with CH<sub>2</sub>Cl<sub>2</sub> twice. The combined organic layers were dried (anhydrous MgSO<sub>4</sub>), filtered, and the solvent was evaporated under reduced pressure. After purification by chromatography on silica gel (hexanes/EtOAc = 1:1), the title compound was obtained as white solid in 66% yield (38.8 mg). m.p. = 91-92 °C; <sup>1</sup>H NMR (400 MHz, CDCl<sub>3</sub>) δ 7.99 – 7.89 (m, 2H), 7.65 – 7.55 (m, 2H), 7.10 (d, *J* = 8.5 Hz, 2H), 6.97 – 6.87 (m, 2H), 4.96 (d, *J* = 7.9 Hz, 1H), 4.55 (dd, *J* = 12.8, 5.8 Hz, 1H), 4.01 (t, *J* = 7.8 Hz, 1H), 3.69 (s, 3H), 3.14 – 2.94 (m, 5H), 2.18 – 2.07 (m, 1H), 1.82 – 1.61 (m, 6H), 1.40 (s, 9H), 1.28 – 1.14 (m, 4H), 1.05 – 0.90 (m, 2H); <sup>13</sup>C NMR (101 MHz, CDCl<sub>3</sub>) δ 172.1, 171.7, 155.0, 149.5, 145.2, 139.6, 133.9, 130.3, 129.1, 127.9, 121.2, 80.0, 54.3, 52.2, 48.9, 44.5, 41.0, 37.6, 35.4, 33.2, 32.9, 28.2, 26.3, 26.04, 25.99. IR (film): ν (cm<sup>-1</sup>) 3349, 2924, 2852, 2358, 1737, 1656, 1515, 1440, 1301, 1210, 1146, 1090, 958, 839, 772, 742, 571, 537; HR-MS (ESI) *m/z* calcd for C<sub>31</sub>H<sub>41</sub>NNaO<sub>8</sub>S<sup>+</sup> [*M*+Na<sup>+</sup>] 610.24488, found 610.24451; [α]<sub>D</sub><sup>24.1</sup> = -13.8 (c = 0.1, CHCl<sub>3</sub>); dr > 20:1.

### Methyl ((*R*)-3-cyclohexyl-2-(4-(methylsulfonyl)phenyl)propanoyl)-D-tryptophanate (77)

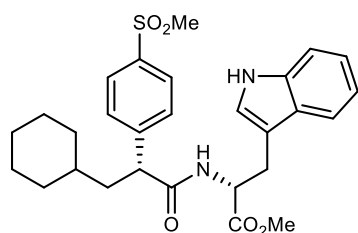

An oven-dried vial was charged with *tert*-butyl (*R*)-3-cyclohexyl-2-(4-(methylsulfonyl)phenyl)propanoate (0.11 mmol, 1.4 equiv) and CH<sub>2</sub>Cl<sub>2</sub> (4 mL). TFA (1 mmol, 10 equiv) was added dropwise to the mixture at 0 °C. The reaction was stirred at 25 °C until TLC shows complete consumption of starting material. After reaction was complete, the solvent was evaporated under reduced pressure. The crude acid was

dissolved in anhydrous DMF (1 mL), then D-tryptophan methyl ester hydrochloride (0.077 mmol, 1.0 equiv), HATU (0.115 mmol, 1.5 equiv), and DIPEA (0.23 mmol, 3.0 equiv) were added under a N<sub>2</sub> atmosphere. The resulting reaction mixture was stirred for 12 h at 25 °C. After this time, a saturated aqueous NH<sub>4</sub>Cl solution was added, and the aqueous phase was extracted with EtOAc twice. The combined organic layers were washed with brine, dried (anhydrous MgSO<sub>4</sub>), filtered, and the solvent was evaporated under reduced pressure. After purification by chromatography on silica gel (hexanes/EtOAc = 3:7), the title compound was obtained as white solid in 82% yield (32.4

mg). m.p. = 97-98 °C; <sup>1</sup>H NMR (400 MHz, CDCl<sub>3</sub>) δ 8.24 (s, 1H), 7.84 – 7.77 (m, 2H), 7.47 (d, *J* = 7.8 Hz, 1H), 7.41 – 7.34 (m, 3H), 7.23 – 7.17 (m, 1H), 7.15 – 7.07 (m, 1H), 6.66 (d, *J* = 2.4 Hz, 1H), 5.85 (d, *J* = 7.8 Hz, 1H), 4.82 (dt, *J* = 7.8, 5.5 Hz, 1H), 3.66 (s, 3H), 3.52 (dd, *J* = 8.4, 7.1 Hz, 1H), 3.32 – 3.18 (m, 2H), 3.06 (s, 3H), 2.01 – 1.88 (m, 1H), 1.73 – 1.57 (m, 6H), 1.17 – 1.00 (m, 4H), 0.97 – 0.81 (m, 2H); <sup>13</sup>C NMR (101 MHz, CDCl<sub>3</sub>) δ 172.1, 172.0, 146.0, 139.1, 136.1, 129.0, 127.6, 127.3, 122.6, 122.3, 119.7, 118.4, 111.5, 109.4, 52.6, 52.4, 50.2, 44.2, 40.3, 34.9, 33.5, 32.6, 27.3, 26.3, 26.0, 25.9. IR (film): ν (cm<sup>-1</sup>) 3370, 2978, 2918, 2848, 1749, 1708, 1597, 1506, 1448, 1364, 1307, 1197, 1165, 1148, 1124, 1055, 1016, 957, 781, 768, 541, 526; HR-MS (ESI) *m/z* calcd for C<sub>28</sub>H<sub>35</sub>N<sub>2</sub>O<sub>5</sub>S<sup>+</sup> [M+H<sup>+</sup>] 511.22612, found 511.22612; [α]<sub>D</sub><sup>24.1</sup> = -6.2 (c = 0.1, CHCl<sub>3</sub>); dr > 20:1.

**(R)-3-Cyclohexyl-2-(4-(methylsulfonyl)phenyl)propan-1-ol (78)**

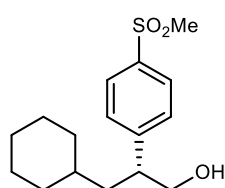

An oven-dried vial was charged with *tert*-butyl (*R*)-3-cyclohexyl-2-(4-(methylsulfonyl)phenyl)propanoate (0.6 mmol, 1.0 equiv), THF (5 mL) was added under a N<sub>2</sub> atmosphere. Then lithium aluminum hydride (LiAlH<sub>4</sub>, 1 M in THF, 0.72 mmol, 1.2 equiv) was added dropwise to the mixture at 0 °C. The reaction was stirred at 0 °C until TLC shows complete consumption of starting material. The reaction was quenched by the dropwise addition of 0.5 mL H<sub>2</sub>O and 5 mL of 1M NaOH solution. The resulting mixture was stirred at 25 °C for 2 h and extracted with EtOAc (3\*10 mL). The organic layer was dried (anhydrous MgSO<sub>4</sub>) and concentrated under reduced pressure. After purification by chromatography on silica gel (hexanes/EtOAc = 1:1), the title compound was obtained as a colorless oil in 78% yield (138.8 mg). <sup>1</sup>H NMR (400 MHz, CDCl<sub>3</sub>) δ 7.90 – 7.85 (m, 2H), 7.44 – 7.38 (m, 2H), 3.73 (ddd, *J* = 18.5, 10.8, 6.6 Hz, 2H), 3.09 – 2.96 (m, 4H), 1.78 – 1.50 (m, 8H), 1.16 – 0.98 (m, 4H), 0.96 – 0.77 (m, 2H). <sup>13</sup>C NMR (101 MHz, CDCl<sub>3</sub>) δ 150.0, 138.6, 129.0, 127.6, 67.5, 45.5, 44.5, 39.5, 34.6, 34.1, 32.6, 26.4, 26.1, 26.0. IR (film): ν (cm<sup>-1</sup>) 3516, 2921, 2849, 2360, 1737, 1596, 1446, 1411, 1301, 1294, 1146, 1090, 1053, 956, 833, 778, 754, 727, 590, 560, 538, 528; HR-MS (ESI) *m/z* calcd for C<sub>16</sub>H<sub>24</sub>NaO<sub>3</sub>S<sup>+</sup> [M+Na<sup>+</sup>] 319.13384, found 319.13396; [α]<sub>D</sub><sup>24.0</sup> = -32.4 (c = 0.1, CHCl<sub>3</sub>); HPLC conditions: AD-H column, hexane/2-propanol = 90/10, flow rate = 0.5 mL/min, λ = 230 nm, t<sub>R</sub> = 59.1 min (major), t<sub>R</sub> = 65.6 min (minor), 97:3 er.

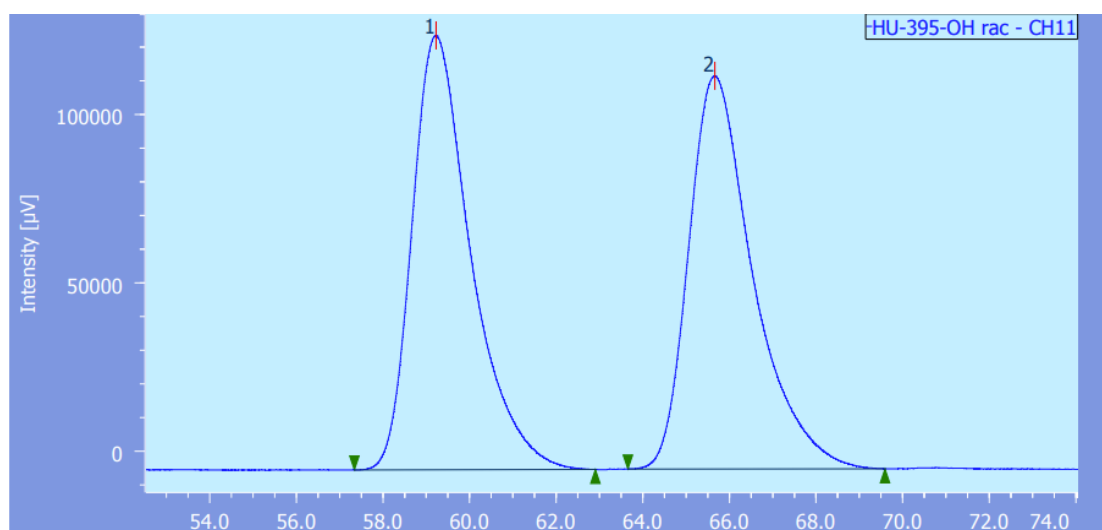

Decision

| # | Peak Name | CH | tR [min] | Area [μV·sec] | Height [μV] | Area%  | Height% | Quantity | NTP   | Resolution | Symmetry Factor | Warning |
|---|-----------|----|----------|---------------|-------------|--------|---------|----------|-------|------------|-----------------|---------|
| 1 | Unknown   | 11 | 59.227   | 12155424      | 128835      | 50.273 | 52.486  | N/A      | 9951  | 2.599      | 1.442           |         |
| 2 | Unknown   | 11 | 65.657   | 12023514      | 116630      | 49.727 | 47.514  | N/A      | 10304 | N/A        | 1.468           |         |



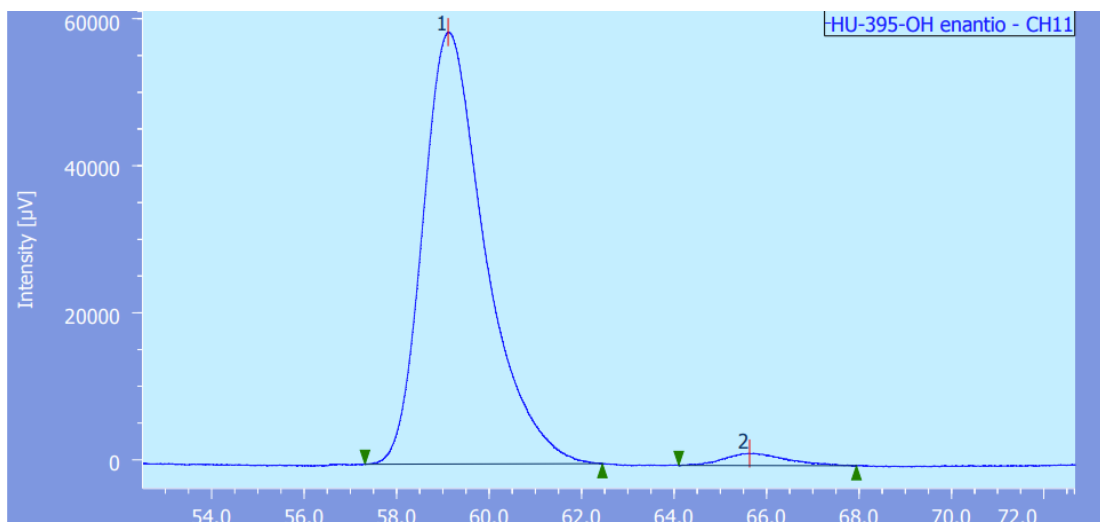

#### Decision

| # | Peak Name | CH | tR [min] | Area [µV·sec] | Height [µV] | Area%  | Height% | Quantity | NTP   | Resolution | Symmetry Factor | Warning |
|---|-----------|----|----------|---------------|-------------|--------|---------|----------|-------|------------|-----------------|---------|
| 1 | Unknown   | 11 | 59.110   | 5494820       | 58702       | 97.224 | 97.244  | N/A      | 10085 | 2.729      | 1.428           |         |
| 2 | Unknown   | 11 | 65.633   | 156890        | 1664        | 2.776  | 2.756   | N/A      | 11580 | N/A        | 1.174           |         |

#### (*R*)-1-(1-Bromo-3-cyclohexylpropan-2-yl)-4-(methylsulfonyl)benzene (79)

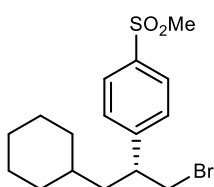

An oven-dried vial was charged with (*R*)-3-cyclohexyl-2-(4-(methylsulfonyl)phenyl)propan-1-ol (0.1 mmol, 1.0 equiv), PPh<sub>3</sub> (0.12 mmol, 1.2 equiv), and CBr<sub>4</sub> (0.11 mmol, 1.1 equiv). CH<sub>2</sub>Cl<sub>2</sub> (2 mL) was added at 0 °C under a N<sub>2</sub> atmosphere. The reaction mixture was stirred at 0 °C for 2 h. The solvent was evaporated under reduced pressure, and the residual was purified by chromatography on silica gel (hexanes/EtOAc = 5:1). The title compound was obtained as a white solid in 96% yield (34.4 mg). m.p. = 80-81 °C; <sup>1</sup>H NMR (400 MHz, CDCl<sub>3</sub>) δ 7.90 (d, *J* = 8.3 Hz, 2H), 7.39 (d, *J* = 8.4 Hz, 2H), 3.52 (ddd, *J* = 18.0, 10.1, 6.9 Hz, 2H), 3.24 – 3.14 (m, 1H), 3.08 (s, 3H), 1.78 – 1.52 (m, 7H), 1.18 – 0.97 (m, 4H), 0.97 – 0.81 (m, 2H); <sup>13</sup>C NMR (101 MHz, CDCl<sub>3</sub>) δ 149.2, 139.1, 128.7, 127.6, 45.0, 44.5, 42.1, 38.1, 34.8, 33.9, 32.5, 26.3, 26.0, 25.9. IR (film): ν (cm<sup>-1</sup>) 2923, 2850, 1737, 1596, 1444, 1412, 1305, 1287, 1268, 1226, 1146, 1124, 1093, 965, 959, 943, 836, 793, 777, 757, 735, 610, 570, 556, 526, 503; HR-MS (ESI) *m/z* calcd for C<sub>16</sub>H<sub>24</sub>BrO<sub>2</sub>S<sup>+</sup> [M+H<sup>+</sup>] 359.06749, found 359.06739; [α]<sub>D</sub><sup>24.0</sup> = -9.0 (c = 0.1, CHCl<sub>3</sub>); HPLC conditions: OJ-H column, hexane/2-propanol = 95/5, flow rate = 1.0 mL/min, λ = 225 nm, t<sub>R</sub> = 60.0 min (major), t<sub>R</sub> = 7.5 min (minor), 97:3 er.

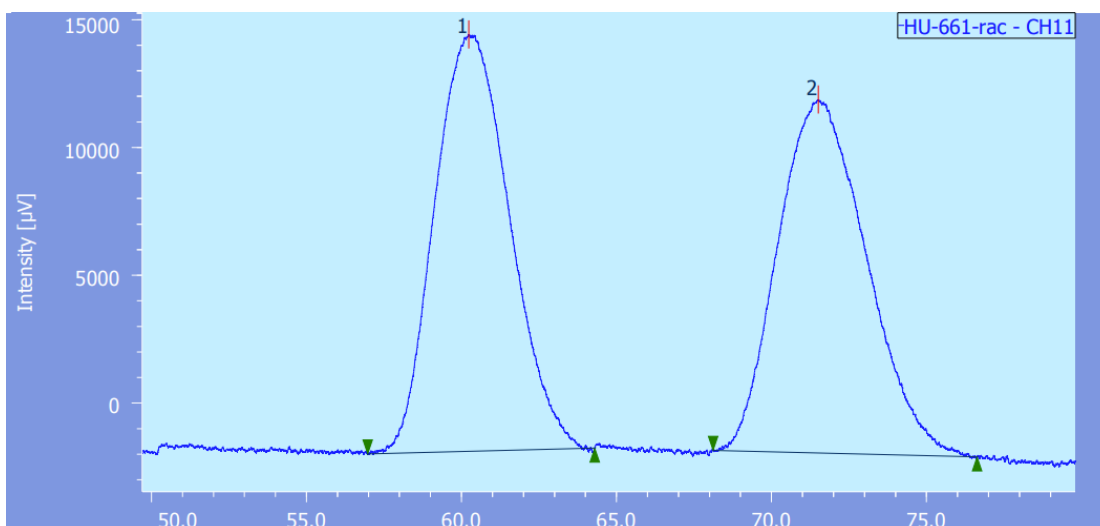

Decision

| # | Peak Name | CH | tR [min] | Area [µV·sec] | Height [µV] | Area%  | Height% | Quantity | NTP  | Resolution | Symmetry Factor | Warning |
|---|-----------|----|----------|---------------|-------------|--------|---------|----------|------|------------|-----------------|---------|
| 1 | Unknown   | 11 | 60.230   | 2745822       | 16297       | 50.041 | 54.119  | N/A      | 2764 | 2.252      | 1.179           |         |
| 2 | Unknown   | 11 | 71.500   | 2741340       | 13817       | 49.959 | 45.881  | N/A      | 2749 | N/A        | 1.196           |         |

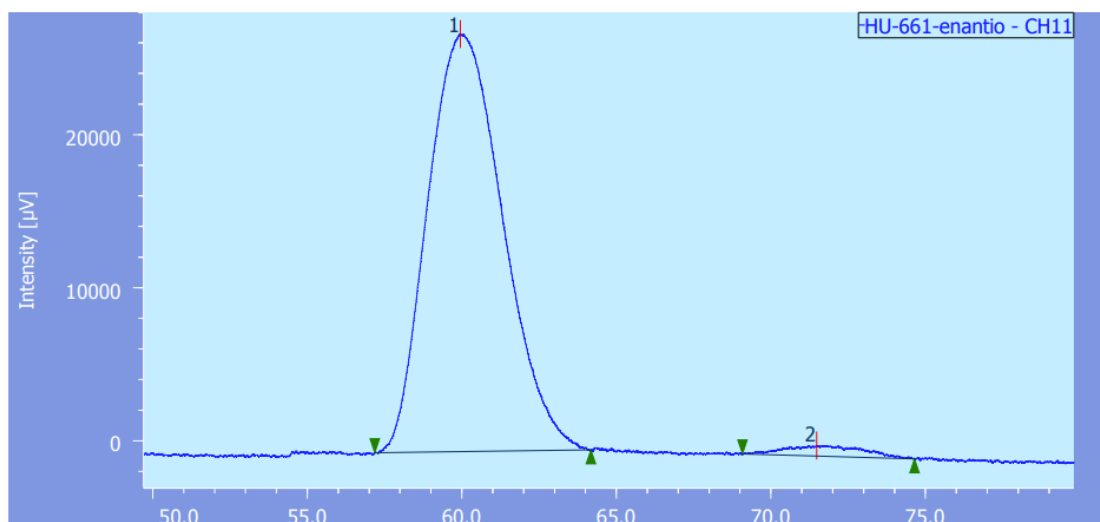

Decision

| # | Peak Name | CH | tR [min] | Area [µV·sec] | Height [µV] | Area%  | Height% | Quantity | NTP  | Resolution | Symmetry Factor | Warning |
|---|-----------|----|----------|---------------|-------------|--------|---------|----------|------|------------|-----------------|---------|
| 1 | Unknown   | 11 | 59.950   | 4617445       | 27262       | 97.385 | 97.509  | N/A      | 2732 | 2.250      | 1.238           |         |
| 2 | Unknown   | 11 | 71.477   | 123991        | 696         | 2.615  | 2.491   | N/A      | 2531 | N/A        | 1.165           |         |

**(R)-2-(3-Cyclohexyl-2-(4-(methylsulfonyl)phenyl)propyl)isoindoline-1,3-dione (80)**

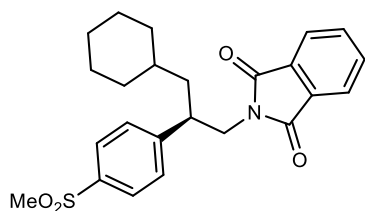

An oven-dried vial was charged with (*R*)-3-cyclohexyl-2-(4-(methylsulfonyl)phenyl)propan-1-ol (0.1 mmol, 1.0 equiv), PPh<sub>3</sub> (0.15 mmol, 1.5 equiv), isoindoline-1,3-dione (0.15 mmol, 1.5 equiv), and THF (2 mL). DIAD (0.15 mmol, 1.5 equiv) was added slowly at 0 °C under a N<sub>2</sub> atmosphere. The reaction mixture was stirred at 25 °C for 20 h. The solvent was evaporated under reduced pressure and the residual was purified by chromatography on silica gel (hexanes/EtOAc = 2:1). The title compound was obtained as a white solid in 88% yield (37.3 mg). m.p. = 140-141°C; <sup>1</sup>H NMR (400 MHz, CDCl<sub>3</sub>) δ 7.80 (d, *J* = 8.3 Hz, 2H), 7.78 – 7.72 (m, 2H), 7.71 – 7.64 (m, 2H), 7.40 (d, *J* = 8.3 Hz, 2H), 3.83 (ddd, *J* = 20.4, 13.6, 8.0 Hz, 2H), 3.55 – 3.40 (m, 1H), 3.00 (s, 3H), 1.78 – 1.48 (m, 7H), 1.16 – 0.97 (m, 4H), 0.95 – 0.76 (m, 2H); <sup>13</sup>C NMR (101

MHz, CDCl<sub>3</sub>) δ 168.0, 148.8, 138.8, 134.0, 131.6, 129.0, 127.5, 123.2, 44.4, 43.6, 41.3, 41.1, 34.7, 34.0, 32.4, 26.4, 26.1, 25.9. IR (film): ν (cm<sup>-1</sup>) 2922, 2853, 1766, 1710, 1430, 1388, 1369, 1303, 1153, 1089, 1081, 973, 956, 830, 754, 719, 709, 693, 563, 548, 528, 497; HR-MS (ESI) m/z calcd for C<sub>24</sub>H<sub>27</sub>NNaO<sub>4</sub>S<sup>+</sup> [M+Na<sup>+</sup>] 448.15530, found 448.15538; [α]<sub>D</sub><sup>24.0</sup> = 71.2 (c = 0.1, CHCl<sub>3</sub>); HPLC conditions: AD-H column, hexane/2-propanol = 85/15, flow rate = 1.0 mL/min, λ = 230 nm, t<sub>R</sub> = 28.0 min (major), t<sub>R</sub> = 30.8 min (minor), 97:3 er.

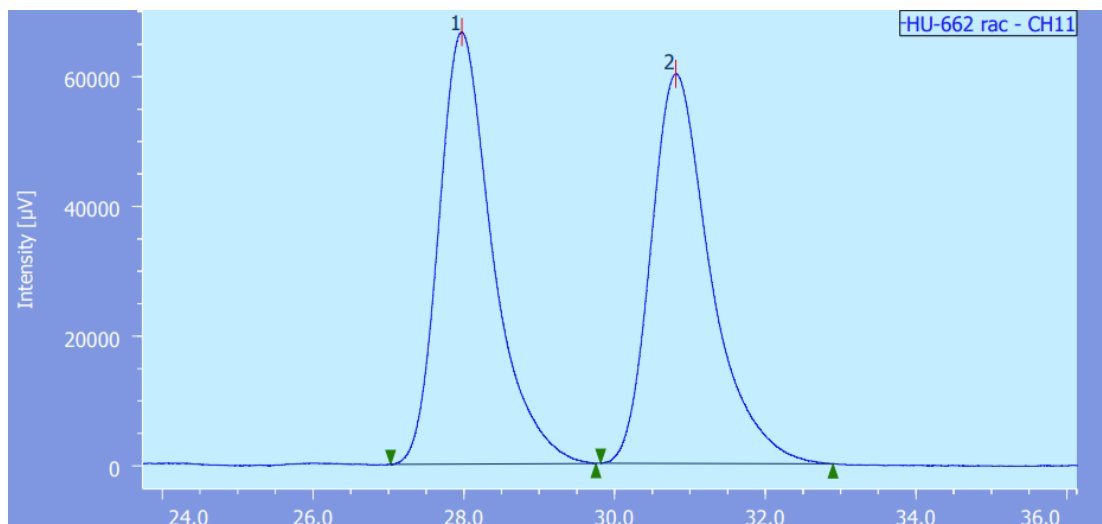

Decision

| # | Peak Name | CH | tR [min] | Area [μV·sec] | Height [μV] | Area%  | Height% | Quantity | NTP  | Resolution | Symmetry Factor | Warning |
|---|-----------|----|----------|---------------|-------------|--------|---------|----------|------|------------|-----------------|---------|
| 1 | Unknown   | 11 | 27.973   | 3310966       | 66581       | 50.059 | 52.590  | N/A      | 8101 | 2.172      | 1.384           |         |
| 2 | Unknown   | 11 | 30.810   | 3303182       | 60023       | 49.941 | 47.410  | N/A      | 8030 | N/A        | 1.423           |         |

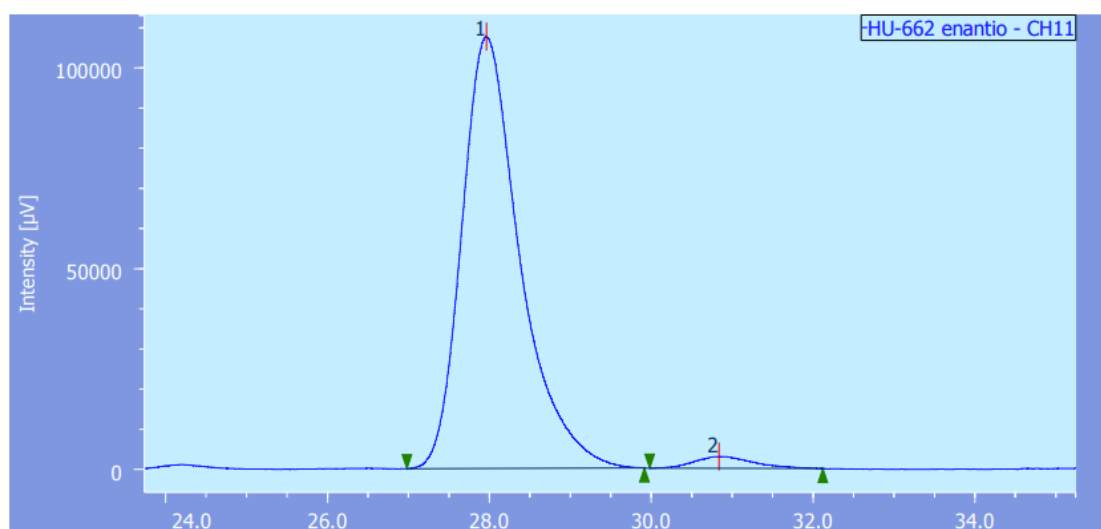

Decision

| # | Peak Name | CH | tR [min] | Area [μV·sec] | Height [μV] | Area%  | Height% | Quantity | NTP  | Resolution | Symmetry Factor | Warning |
|---|-----------|----|----------|---------------|-------------|--------|---------|----------|------|------------|-----------------|---------|
| 1 | Unknown   | 11 | 27.963   | 5365986       | 107465      | 97.292 | 97.346  | N/A      | 8081 | 2.235      | 1.401           |         |
| 2 | Unknown   | 11 | 30.837   | 149342        | 2930        | 2.708  | 2.654   | N/A      | 8548 | N/A        | 1.253           |         |

**(R)-2-((3-Cyclohexyl-2-(4-(methylsulfonyl)phenyl)propyl)thio)benzo[d]thiazole (81)**

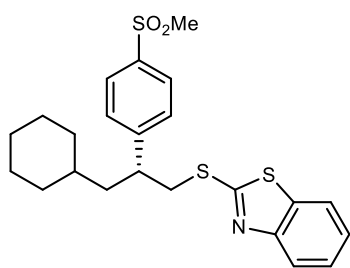

An oven-dried vial was charged with (*R*)-3-cyclohexyl-2-(4-(methylsulfonyl)phenyl)propan-1-ol (0.1 mmol, 1.0 equiv), PPh<sub>3</sub> (0.12 mmol, 1.2 equiv), 2(3H)-benzothiazolethione (0.11 mmol, 1.1 equiv), and THF (2 mL). DEAD (0.12 mmol, 1.2 equiv) was added slowly at 0 °C under a N<sub>2</sub> atmosphere. The reaction mixture was stirred at 25 °C for 4 h. The solvent was evaporated under reduced pressure, and the residual was purified by chromatography on silica gel (hexanes: EtOAc = 3:1), the title compound was obtained as a colorless oil in 99% yield (44.2 mg). <sup>1</sup>H NMR (400 MHz, CDCl<sub>3</sub>) δ 7.88 – 7.82 (m, 3H), 7.76 – 7.70 (m, 1H), 7.46 – 7.38 (m, 3H), 7.33 – 7.27 (m, 1H), 3.72 (dd, *J* = 13.2, 5.7 Hz, 1H), 3.51 (dd, *J* = 13.2, 8.7 Hz, 1H), 3.38 – 3.27 (m, 1H), 2.97 (s, 3H), 1.81 – 1.57 (m, 7H), 1.21 – 1.03 (m, 4H), 0.98 – 0.83 (m, 2H); <sup>13</sup>C NMR (101 MHz, CDCl<sub>3</sub>) δ 166.5, 152.7, 149.9, 138.8, 135.0, 128.9, 127.6, 126.2, 124.4, 121.3, 121.0, 44.4, 43.1, 42.7, 39.9, 34.8, 33.8, 32.6, 26.4, 26.07, 25.95. IR (film): ν (cm<sup>-1</sup>) 2921, 2849, 1597, 1458, 1427, 1411, 1308, 1292, 1239, 1146, 1090, 993, 954, 836, 780, 754, 726, 575, 556, 532, 503; HR-MS (ESI) *m/z* calcd for C<sub>23</sub>H<sub>28</sub>NO<sub>2</sub>S<sub>3</sub><sup>+</sup> [M+H<sup>+</sup>] 446.12767, found 446.12805; [α]<sub>D</sub><sup>24.0</sup> = 74.8 (c = 0.1, CHCl<sub>3</sub>); HPLC conditions: IB column, hexane/2-propanol = 85/15, flow rate = 1.0 mL/min, λ = 230 nm, t<sub>R</sub> = 16.9 min (major), t<sub>R</sub> = 20.2 min (minor), 97:3 er.

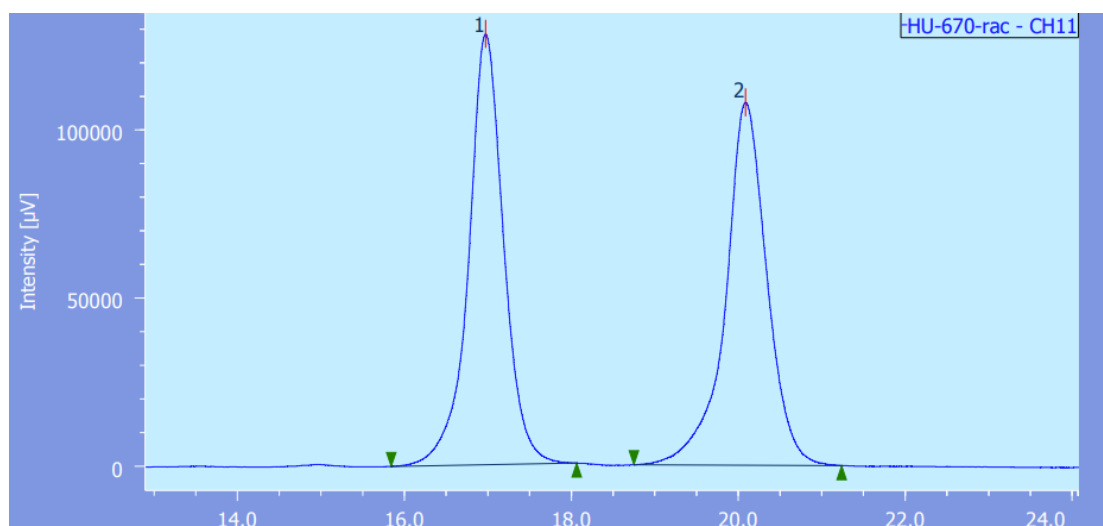

Decision

| # | Peak Name | CH | tR [min] | Area [μV·sec] | Height [μV] | Area%  | Height% | Quantity | NTP  | Resolution | Symmetry Factor | Warning |
|---|-----------|----|----------|---------------|-------------|--------|---------|----------|------|------------|-----------------|---------|
| 1 | Unknown   | 11 | 16.970   | 3748086       | 127984      | 50.106 | 54.270  | N/A      | 9070 | 4.062      | 0.971           |         |
| 2 | Unknown   | 11 | 20.083   | 3732171       | 107843      | 49.894 | 45.730  | N/A      | 9502 | N/A        | 0.924           |         |

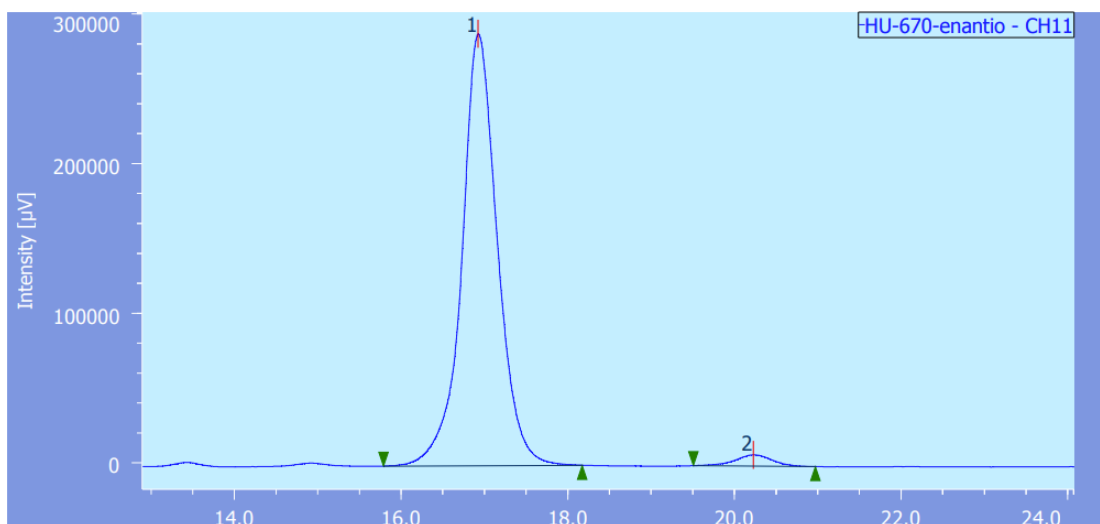

Decision

| # | Peak Name | CH | tR [min] | Area [µV·sec] | Height [µV] | Area%  | Height% | Quantity | NTP   | Resolution | Symmetry Factor | Warning |
|---|-----------|----|----------|---------------|-------------|--------|---------|----------|-------|------------|-----------------|---------|
| 1 | Unknown   | 11 | 16.923   | 8564961       | 288459      | 97.333 | 97.465  | N/A      | 8727  | 4.357      | 1.016           |         |
| 2 | Unknown   | 11 | 20.227   | 234661        | 7502        | 2.667  | 2.535   | N/A      | 10334 | N/A        | 0.933           |         |

***tert*-Butyl (*R*)-2-(3-chloro-4-(methylsulfonyl)phenyl)-3-cyclopentylpropanoate (**82**)**

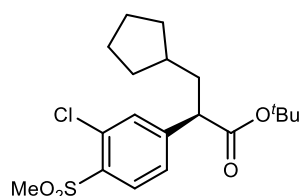

Prepared by **GP-B**. Colorless oil, 50.3 mg, 65% yield. <sup>1</sup>H NMR (400 MHz, CDCl<sub>3</sub>) δ 8.07 (d, *J* = 8.2 Hz, 1H), 7.51 (d, *J* = 1.7 Hz, 1H), 7.40 (dd, *J* = 8.2, 1.7 Hz, 1H), 3.54 (t, *J* = 7.7 Hz, 1H), 3.26 (s, 3H), 2.04 (dt, *J* = 13.4, 7.8 Hz, 1H), 1.78 – 1.69 (m, 3H), 1.65 – 1.56 (m, 3H), 1.50 – 1.45 (m, 2H), 1.40 (s, 9H), 1.16 – 1.02 (m, 2H); <sup>13</sup>C NMR (101 MHz, CDCl<sub>3</sub>) δ 171.8, 147.8, 136.4, 132.5, 131.3, 130.8, 127.1, 81.6, 51.6, 42.8, 39.9, 37.8, 32.7, 32.3, 27.9, 25.1, 25.0. IR (film): ν (cm<sup>-1</sup>) 3008, 2977, 2950, 2868, 1713, 1590, 1454, 1392, 1367, 1317, 1246, 1137, 1115, 1039, 965, 839, 763, 599, 533, 508; HR-MS (ESI) *m/z* calcd for C<sub>19</sub>H<sub>27</sub>ClNaO<sub>4</sub>S<sup>+</sup> [M+Na<sup>+</sup>] 409.12108, found 409.12109; [α]<sub>D</sub><sup>24.0</sup> = -18.2 (c = 0.1, CHCl<sub>3</sub>); HPLC conditions: IB column, hexane/2-propanol = 99/1, flow rate = 0.5 mL/min, λ = 230 nm, t<sub>R</sub> = 38.3 min (major), t<sub>R</sub> = 41.8 min (minor), 97:3 er.

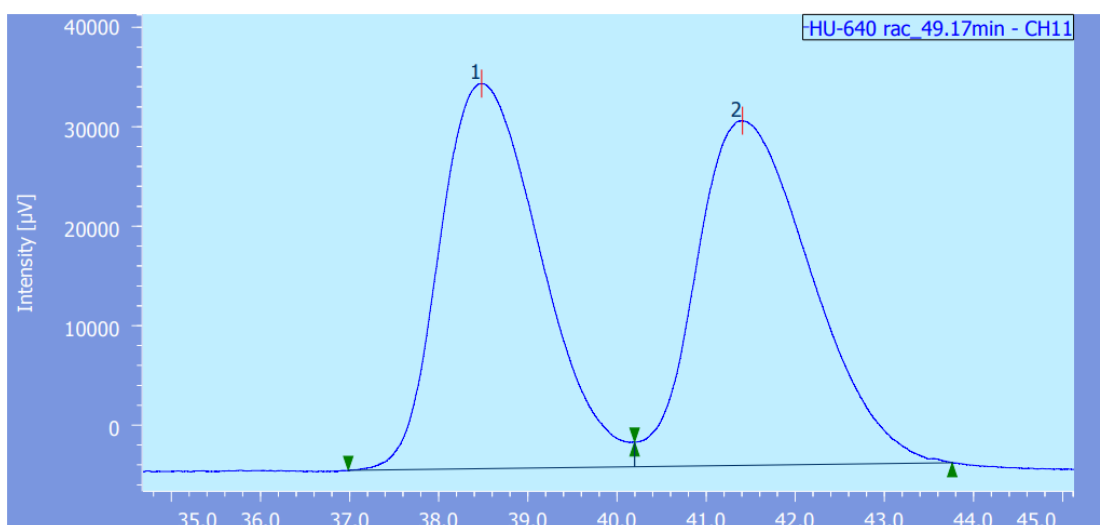

Decision

| # | Peak Name | CH | tR [min] | Area [µV·sec] | Height [µV] | Area%  | Height% | Quantity | NTP  | Resolution | Symmetry Factor | Warning |
|---|-----------|----|----------|---------------|-------------|--------|---------|----------|------|------------|-----------------|---------|
| 1 | Unknown   | 11 | 38.480   | 3053491       | 38680       | 49.514 | 52.770  | N/A      | 5302 | 1.300      | N/A             |         |
| 2 | Unknown   | 11 | 41.407   | 3113448       | 34618       | 50.486 | 47.230  | N/A      | 4765 | N/A        | N/A             |         |

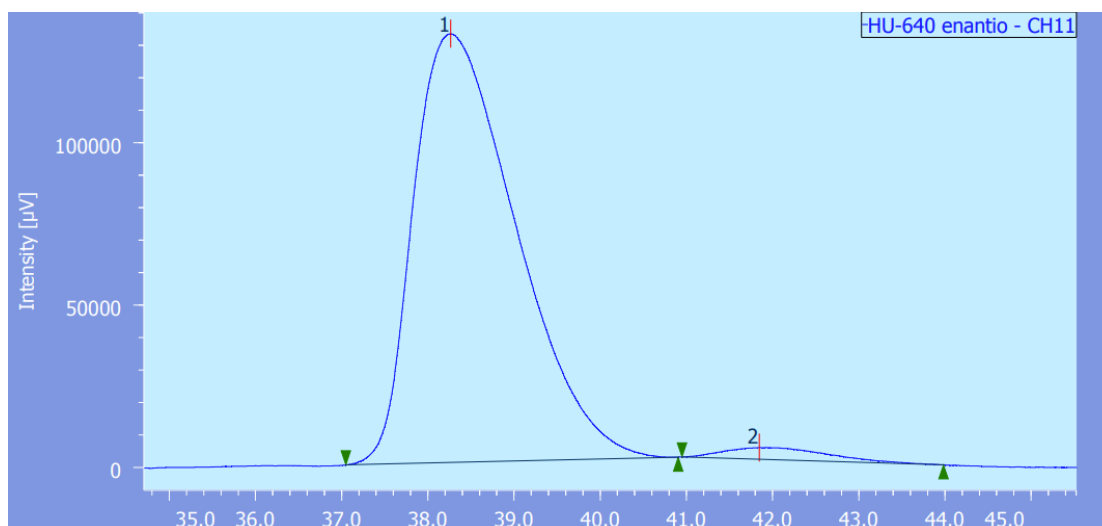

Decision

| # | Peak Name | CH | tR [min] | Area [µV·sec] | Height [µV] | Area%  | Height% | Quantity | NTP  | Resolution | Symmetry Factor | Warning |
|---|-----------|----|----------|---------------|-------------|--------|---------|----------|------|------------|-----------------|---------|
| 1 | Unknown   | 11 | 38.263   | 10927037      | 131976      | 97.221 | 97.350  | N/A      | 4721 | 1.564      | 1.585           |         |
| 2 | Unknown   | 11 | 41.843   | 312305        | 3592        | 2.779  | 2.650   | N/A      | 5015 | N/A        | 1.604           |         |

**(R)-2-(3-Chloro-4-(methylsulfonyl)phenyl)-3-cyclopentyl-N-(pyrazin-2-yl)propanamide (83)**

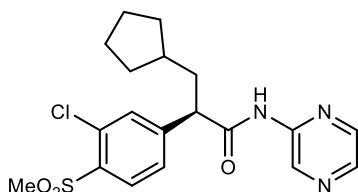

An oven-dried vial was charged with *tert*-butyl (*R*)-2-(3-chloro-4-(methylsulfonyl)phenyl)-3-cyclopentylpropanoate (0.1 mmol, 1.0 equiv) and CH<sub>2</sub>Cl<sub>2</sub> (4 mL). TFA (1 mmol, 10 equiv) was added dropwise to the mixture at 0 °C, and the reaction was stirred at 25 °C until TLC shows complete consumption of starting material. After the reaction was complete, the solvent was evaporated under reduced pressure. The crude acid was then dissolved in anhydrous CH<sub>2</sub>Cl<sub>2</sub> (2 mL), oxalyl chloride (0.11 mmol, 1.1 equiv) and one drop of DMF was added at 0 °C. The reaction was stirred at 0 °C for 10 min then at room temperature for 1 h to obtain a solution of the acid chloride. A solution of 2-aminopyrazine (0.22 mmol, 2.2 equiv) and pyridine (0.22 mmol, 2.2 equiv) in anhydrous THF (2 mL) was added. The reaction was stirred at 25 °C until TLC shows complete consumption of starting material. After purification by chromatography on silica gel (hexanes/EtOAc = 2:1), the title compound was obtained as a white solid in 72% yield (29.3 mg). m.p. = 86–87 °C; <sup>1</sup>H NMR (400 MHz, CDCl<sub>3</sub>) δ 9.52 (s, 1H), 8.35 (d, *J* = 2.4 Hz, 1H), 8.27 (s, 1H), 8.23 – 8.18 (m, 1H), 8.10 (d, *J* = 8.2 Hz, 1H), 7.61 (d, *J* = 1.6 Hz, 1H), 7.50 (dd, *J* = 8.2, 1.6 Hz, 1H), 3.71 (t, *J* = 7.4 Hz, 1H), 3.27 (s, 3H), 2.22 (dt, *J* = 13.6, 7.6 Hz, 1H), 1.94 – 1.84 (m, 1H), 1.82 – 1.72 (m, 2H), 1.71 – 1.64 (m, 1H), 1.64 – 1.56 (m, 2H), 1.53 – 1.44 (m, 2H), 1.19 – 1.09 (m, 2H); <sup>13</sup>C NMR (101 MHz, CDCl<sub>3</sub>) δ 170.4, 147.8, 146.9, 142.0, 140.5, 137.0, 136.9, 133.0, 131.3, 131.2, 127.0, 52.7, 42.8, 40.0, 37.7, 32.7, 32.3, 25.0. IR (film): ν (cm<sup>-1</sup>) 3292, 2949, 2927, 2860, 1696, 1590, 1538, 1513, 1409, 1310, 1292, 1266, 1179, 1148, 1115, 1038, 1010, 956, 843, 761, 596, 507, 418; HR-MS (ESI) *m/z* calcd for C<sub>19</sub>H<sub>23</sub>ClN<sub>3</sub>O<sub>3</sub>S<sup>+</sup> [M+H<sup>+</sup>] 408.11432, found 408.11428; [α]<sub>D</sub><sup>24.0</sup> = -33.6 (c = 0.1, CHCl<sub>3</sub>); HPLC conditions: AD-H column, hexane/2-propanol = 85/15, flow rate = 1.0 mL/min, λ = 230 nm, t<sub>R</sub> = 21.6 min (minor), t<sub>R</sub> = 23.8 min (major), 97:3 er.

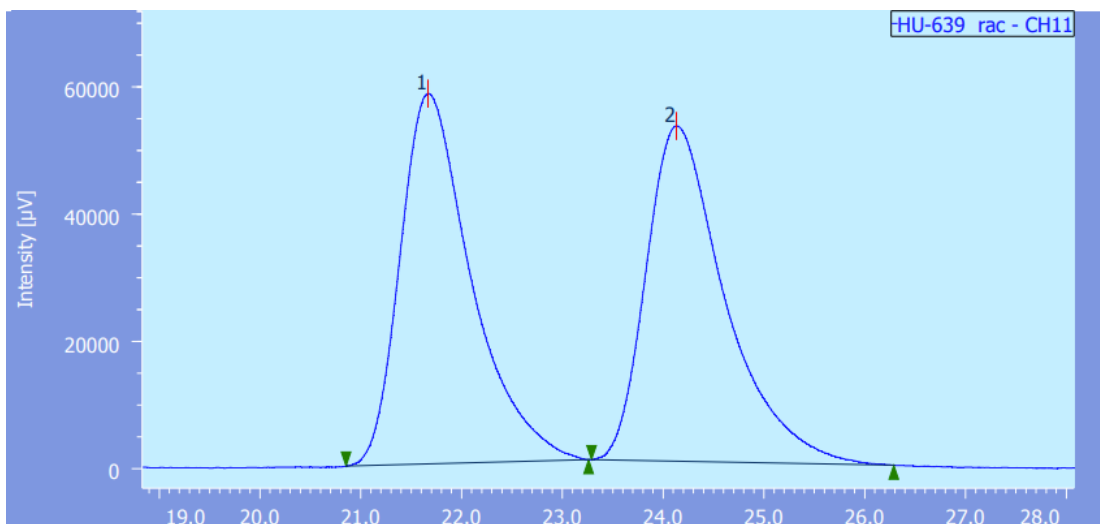

Decision

| # | Peak Name | CH | tR [min] | Area [μV·sec] | Height [μV] | Area%  | Height% | Quantity | NTP  | Resolution | Symmetry Factor | Warning |
|---|-----------|----|----------|---------------|-------------|--------|---------|----------|------|------------|-----------------|---------|
| 1 | Unknown   | 11 | 21.667   | 2852546       | 58170       | 49.910 | 52.504  | N/A      | 4909 | 1.902      | 1.511           |         |
| 2 | Unknown   | 11 | 24.130   | 2862853       | 52622       | 50.090 | 47.496  | N/A      | 5039 | N/A        | 1.574           |         |

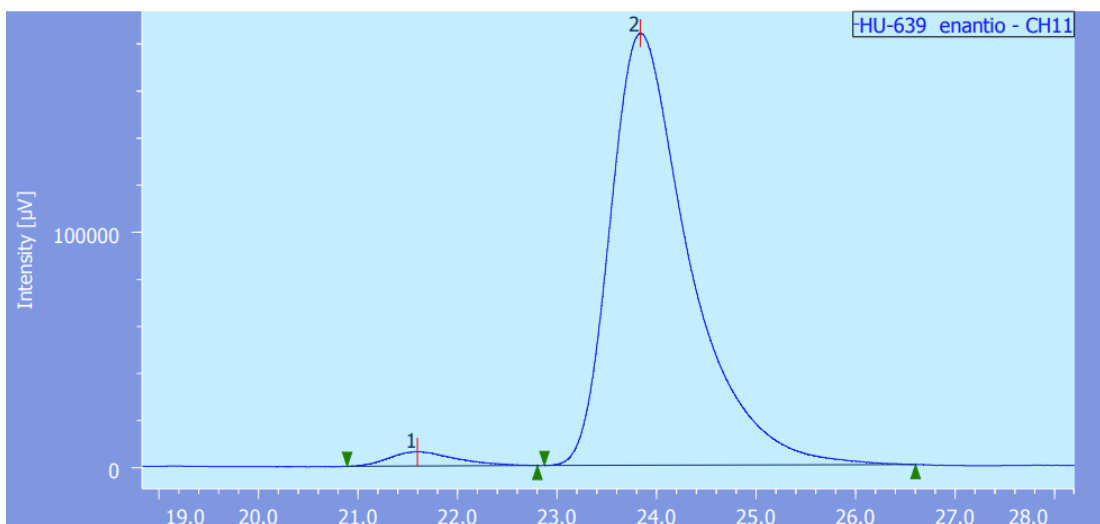

Decision

| # | Peak Name | CH | tR [min] | Area [μV·sec] | Height [μV] | Area%  | Height% | Quantity | NTP  | Resolution | Symmetry Factor | Warning |
|---|-----------|----|----------|---------------|-------------|--------|---------|----------|------|------------|-----------------|---------|
| 1 | Unknown   | 11 | 21.597   | 287424        | 6128        | 2.756  | 3.232   | N/A      | 5060 | 1.745      | 1.348           |         |
| 2 | Unknown   | 11 | 23.837   | 10141524      | 183491      | 97.244 | 96.768  | N/A      | 4918 | N/A        | 1.613           |         |

### *tert*-Butyl (*R*)-3-cyclopentyl-2-(4-(methylsulfonyl)phenyl)propanoate (**84**)

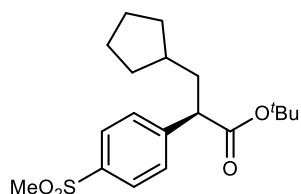

Prepared by **GP-B**. White solid, 48 mg, 68% yield. m.p. = 80-81 °C; <sup>1</sup>H NMR (400 MHz, CDCl<sub>3</sub>) δ 7.91 – 7.86 (m, 2H), 7.55 – 7.48 (m, 2H), 3.58 (t, *J* = 7.7 Hz, 1H), 3.05 (s, 3H), 2.06 (dt, *J* = 13.5, 7.7 Hz, 1H), 1.80 – 1.68 (m, 3H), 1.65 – 1.56 (m, 3H), 1.47 – 1.43 (m, 2H), 1.39 (s, 9H), 1.19 – 1.02 (m, 2H); <sup>13</sup>C NMR (101 MHz, CDCl<sub>3</sub>) δ 172.4, 146.3, 139.1, 129.0, 127.5, 81.2, 51.9, 44.5, 39.9, 37.8, 32.7, 32.3, 27.9,

25.05, 25.02. IR (film): ν (cm<sup>-1</sup>) 3005, 2978, 2941, 2867, 1720, 1595, 1453, 1366, 1315, 1305, 1240, 1138, 1090, 962, 843, 771, 747, 565, 547, 529, 465; HR-MS (ESI) *m/z* calcd for C<sub>19</sub>H<sub>28</sub>NaO<sub>4</sub>S<sup>+</sup> [M+Na<sup>+</sup>] 375.16005, found 375.15956; [α]<sub>D</sub><sup>24.0</sup> = -15.6 (c = 0.1, CHCl<sub>3</sub>); HPLC conditions (er was determined by reducing the product to the corresponding alcohol with LiAlH<sub>4</sub>): OJ-H column, hexane/2-propanol = 85/15, flow rate = 1.0 mL/min, λ = 230 nm, t<sub>R</sub> = 23.1 min (minor), t<sub>R</sub> = 30.2

min (major), 97:3 er.

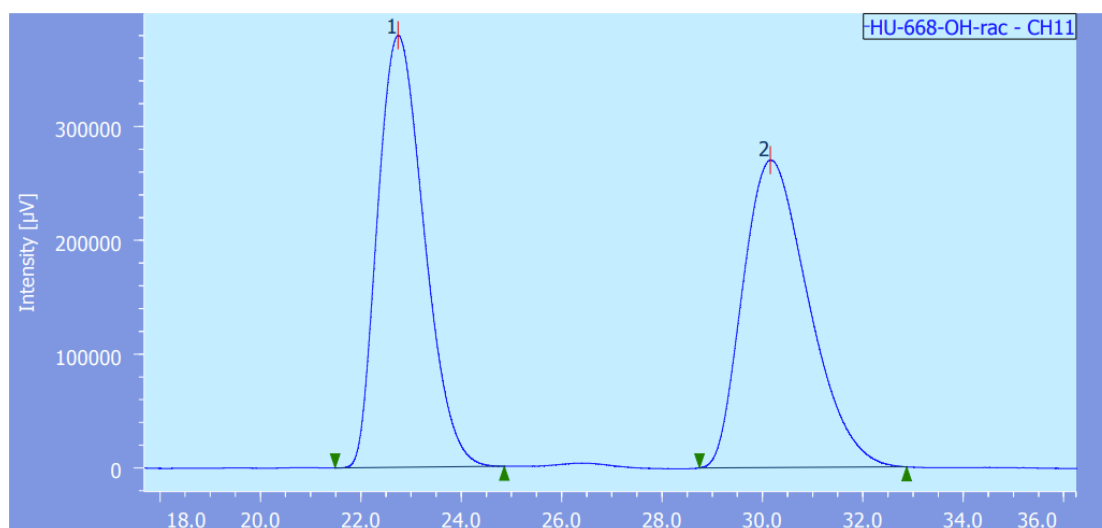

Decision

| # | Peak Name | CH | tR [min] | Area [μV-sec] | Height [μV] | Area%  | Height% | Quantity | NTP  | Resolution | Symmetry Factor | Warning |
|---|-----------|----|----------|---------------|-------------|--------|---------|----------|------|------------|-----------------|---------|
| 1 | Unknown   | 11 | 22.740   | 24366336      | 379289      | 49.757 | 58.411  | N/A      | 2762 | 3.562      | 1.291           |         |
| 2 | Unknown   | 11 | 30.153   | 24604240      | 270061      | 50.243 | 41.589  | N/A      | 2438 | N/A        | 1.358           |         |

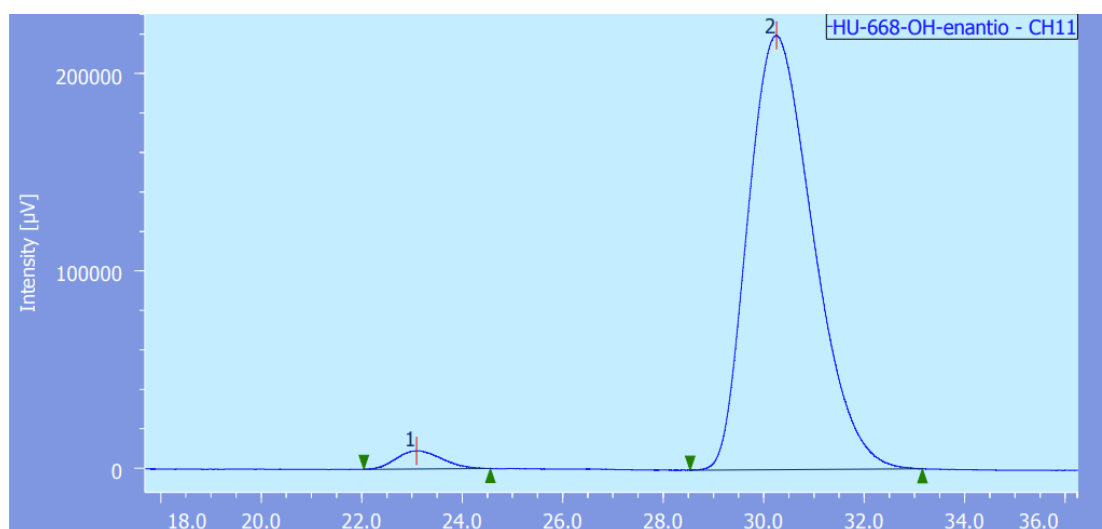

Decision

| # | Peak Name | CH | tR [min] | Area [μV-sec] | Height [μV] | Area%  | Height% | Quantity | NTP  | Resolution | Symmetry Factor | Warning |
|---|-----------|----|----------|---------------|-------------|--------|---------|----------|------|------------|-----------------|---------|
| 1 | Unknown   | 11 | 23.090   | 582699        | 9206        | 2.862  | 4.019   | N/A      | 2905 | 3.482      | 1.196           |         |
| 2 | Unknown   | 11 | 30.250   | 19774561      | 219853      | 97.138 | 95.981  | N/A      | 2522 | N/A        | 1.303           |         |

### (R)-3-Cyclopentyl-2-(4-(methylsulfonyl)phenyl)-N-(thiazol-2-yl)propanamide (85)

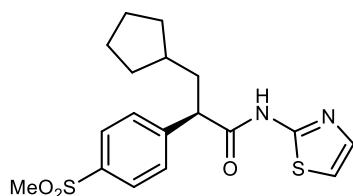

An oven-dried vial was charged with *tert*-butyl (*R*)-3-cyclopentyl-2-(4-(methylsulfonyl)phenyl)propanoate (0.1 mmol, 1.0 equiv) and CH<sub>2</sub>Cl<sub>2</sub> (4 mL). TFA (1 mmol, 10 equiv) was added dropwise to the mixture at 0 °C, and the reaction was stirred at 25 °C until TLC shows complete consumption of starting material. After the reaction was complete, the solvent was evaporated under reduced pressure. Then the crude acid was dissolved in anhydrous CH<sub>2</sub>Cl<sub>2</sub> (2 mL), oxalyl chloride (0.11 mmol, 1.1 equiv) and one drop of DMF was added at 0 °C. The reaction was stirred at 0 °C for 10 min then room temperature for 1 h to obtain a solution of acid chloride. A solution of 2-thiazolamine (0.22 mmol, 2.2 equiv) and pyridine (0.22 mmol, 2.2 equiv) in anhydrous



THF (2 mL) was added. The reaction was stirred at 25 °C until TLC shows complete consumption of starting material. After purification by chromatography on silica gel (hexanes/EtOAc = 2:1), the title compound was obtained as a white solid in 75% yield (28.5 mg). m.p. = 78-79 °C; <sup>1</sup>H NMR (400 MHz, CDCl<sub>3</sub>) δ 7.85 (d, *J* = 8.4 Hz, 2H), 7.58 – 7.50 (m, 3H), 7.09 (d, *J* = 3.7 Hz, 1H), 3.87 (t, *J* = 7.6 Hz, 1H), 3.02 (s, 3H), 2.27 (dt, *J* = 13.6, 7.6 Hz, 1H), 1.97 – 1.86 (m, 1H), 1.81 – 1.62 (m, 3H), 1.62 – 1.52 (m, 2H), 1.51 – 1.39 (m, 2H), 1.18 – 1.03 (m, 2H); <sup>13</sup>C NMR (101 MHz, CDCl<sub>3</sub>) δ 170.9, 160.0, 144.9, 139.7, 135.4, 128.9, 127.9, 114.3, 52.0, 44.4, 40.0, 37.8, 32.7, 32.4, 25.0. IR (film): ν (cm<sup>-1</sup>) 3161, 2943, 2912, 2867, 2849, 1687, 1544, 1305, 1167, 1147, 1089, 955, 770, 719, 544, 524; HR-MS (ESI) *m/z* calcd for C<sub>18</sub>H<sub>23</sub>N<sub>2</sub>O<sub>3</sub>S<sub>2</sub><sup>+</sup> [M+H<sup>+</sup>] 379.11446, found 379.11478; [α]<sub>D</sub><sup>24.0</sup> = -68.0 (c = 0.1, CHCl<sub>3</sub>); HPLC conditions: OD-H column, hexane/2-propanol = 85/15, flow rate = 1.0 mL/min, λ = 230 nm, t<sub>R</sub> = 13.8 min (minor), t<sub>R</sub> = 18.8 min (major), 97:3 er.

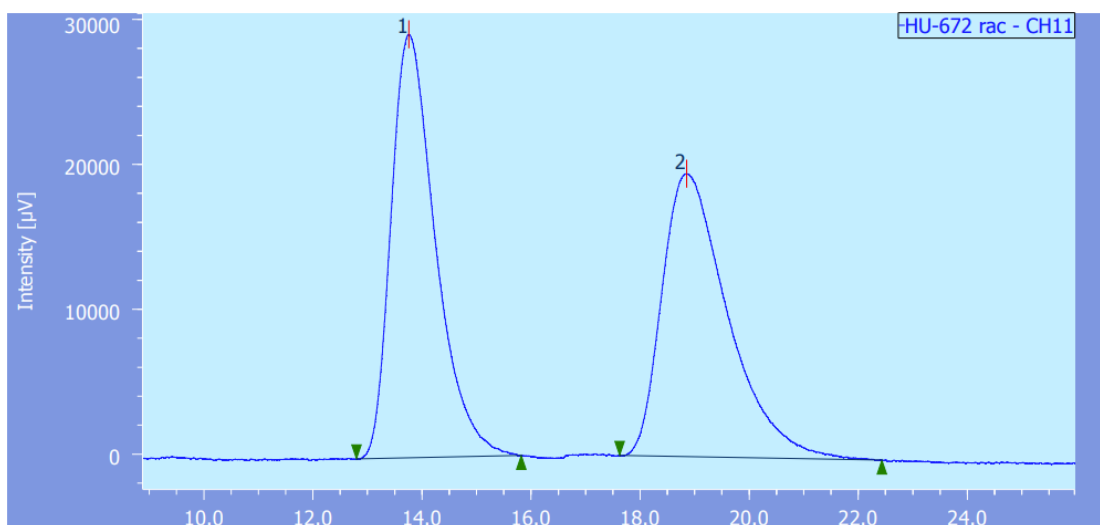

Decision

| # | Peak Name | CH | tR [min] | Area [μV·sec] | Height [μV] | Area%  | Height% | Quantity | NTP  | Resolution | Symmetry Factor | Warning |
|---|-----------|----|----------|---------------|-------------|--------|---------|----------|------|------------|-----------------|---------|
| 1 | Unknown   | 11 | 13.757   | 1649203       | 29203       | 50.201 | 59.939  | N/A      | 1438 | 2.841      | 1.463           |         |
| 2 | Unknown   | 11 | 18.850   | 1635970       | 19518       | 49.799 | 40.061  | N/A      | 1237 | N/A        | 1.598           |         |

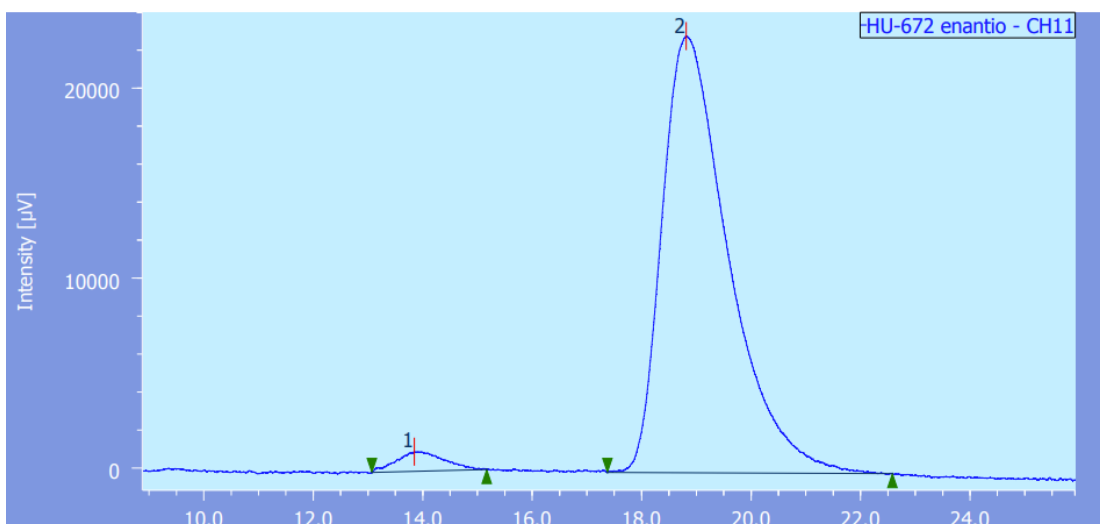

Decision

| # | Peak Name | CH | tR [min] | Area [μV·sec] | Height [μV] | Area%  | Height% | Quantity | NTP  | Resolution | Symmetry Factor | Warning |
|---|-----------|----|----------|---------------|-------------|--------|---------|----------|------|------------|-----------------|---------|
| 1 | Unknown   | 11 | 13.843   | 63761         | 1045        | 3.192  | 4.351   | N/A      | 1187 | 2.659      | 1.345           |         |
| 2 | Unknown   | 11 | 18.813   | 1933655       | 22981       | 96.808 | 95.649  | N/A      | 1236 | N/A        | 1.648           |         |

## Experimental Procedures for Radical Trapping Experiment

### General Procedure D (GP-D):

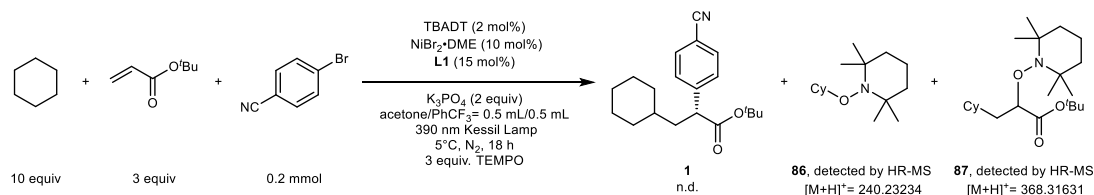

**GP-D:** In a nitrogen-filled glove box, a reaction vial (5 mL) equipped with a stirring bar was charged with tetrabutylammonium decatungstate (TBADT, 0.004 mmol, 2 mol%), NiBr<sub>2</sub>·DME (0.02 mmol, 10 mol%), (4*S*,4'*S*)-4,4'-di(*S*)-*sec*-butyl)-1,1'-bis(3-(*tert*-butyl)phenyl)-4,4',5,5'-tetrahydro-1*H*,1'*H*-2,2'-biimidazole (**L1**, 0.03 mmol, 15 mol%), anhydrous K<sub>3</sub>PO<sub>4</sub> (0.4 mmol, 2 equiv), 4-bromobenzonitrile (0.2 mmol, 1 equiv), 2,2,6,6-tetramethyl-1-piperidinyloxy (TEMPO, 0.6 mmol, 3 equiv), cyclohexane (2 mmol, 10 equiv), *tert*-butyl acrylate (0.6 mmol, 3 equiv), dry acetone (0.5 mL), and dry  $\alpha,\alpha,\alpha$ -trifluorotoluene (0.5 mL). The vial was sealed and removed from the glovebox. The reaction mixture was pre-stirred for 20 min, then irradiated with a Kessil® PR160-390nm lamp at 5 °C with a distance of ~3 cm from the surface of the reaction vial. After 18 h of irradiation, the resulting mixture was passed through a pipette plug of Celite/silica gel and eluted with EtOAc. After concentration under reduced pressure, the mixture was analyzed by HR-MS. It was found that the reaction was completely suppressed by adding TEMPO (3.0 equiv) and the TEMPO-adducts **86** and **87** were detected by HR-MS (Supplementary Figure 1), which suggests that a carbon radical derived from the cyclohexane is generated under the applied conditions.

## Experimental Procedures for Radical Clock Experiment

### General Procedure E (GP-E):

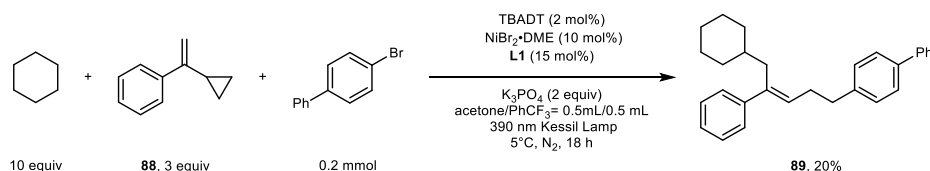

**GP-E:** In a nitrogen-filled glove box, a reaction vial (5 mL) equipped with a stirring bar was charged with tetrabutylammonium decatungstate (TBADT, 0.004 mmol, 2 mol%), NiBr<sub>2</sub>·DME (0.02 mmol, 10 mol%), (4*S*,4'*S*)-4,4'-di(*S*)-*sec*-butyl)-1,1'-bis(3-(*tert*-butyl)phenyl)-4,4',5,5'-tetrahydro-1*H*,1'*H*-2,2'-biimidazole (**L1**, 0.03 mmol, 15 mol%), anhydrous K<sub>3</sub>PO<sub>4</sub> (0.4 mmol, 2 equiv), 4-bromo-1,1'-biphenyl (0.2 mmol, 1 equiv), cyclohexane (2 mmol, 10 equiv), (1-cyclopropylvinyl)benzene (0.6 mmol, 3 equiv), dry acetone (0.5 mL), and dry  $\alpha,\alpha,\alpha$ -trifluorotoluene (0.5 mL). The vial was sealed and removed from the glovebox. The reaction mixture was pre-stirred for 20 min, then irradiated with a Kessil® PR160-390nm lamp at 5 °C with a distance of ~3 cm from the surface of the reaction vial. After 18 h of irradiation, the resulting mixture was passed through a pipette plug of Celite/silica gel and eluted with ethyl acetate. After concentration under reduced pressure, the crude mixture was purified by chromatography on silica gel to give the corresponding product **89**.

## Synthesis and Characterization of Aryl–Ni(II) Bromide Complex **90**

### General Procedure F (GP-F):

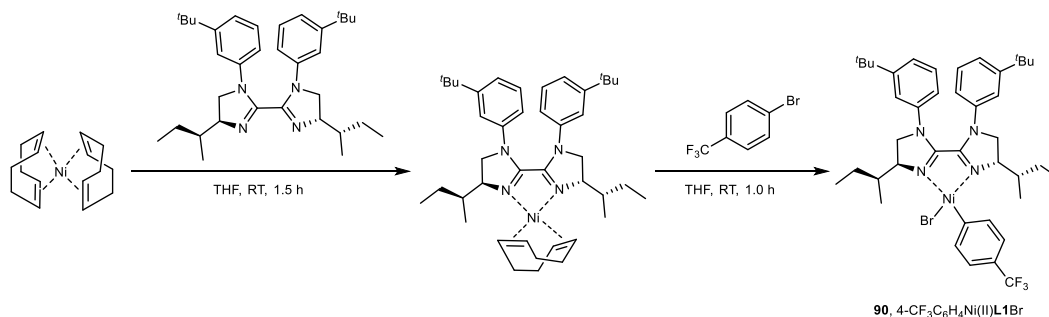

**GP-F:** A flame dried 10 mL Schlenk flask equipped with a stirring bar was charged with Ni(COD)<sub>2</sub> (0.50 mmol, 1 equiv) in a N<sub>2</sub>-filled glovebox. (4*S*,4'*S*)-4,4'-di(*S*)-*sec*-Butyl-1,1'-bis(3-(*tert*-butyl)phenyl)-4,4',5,5'-tetrahydro-1*H*,1'*H*-2,2'-biimidazole (**L1**, 0.50 mmol, 1.0 equiv) was added under a flow of N<sub>2</sub>, and the solids were dissolved in 5 mL of dry THF. The resulting solution was stirred for 1.5 h at 25 °C. After this time, the mixture was cooled to -35 °C in an acetonitrile/dry ice bath, and 1-bromo-4-(trifluoromethyl)benzene (0.6 mmol, 1.2 equiv) was added via a microsyringe. The resulting mixture was stirred at 25 °C for 1.0 h, and partially THF was removed under high vacuum (approximately 0.5 mL THF should remain in the system). The complex was precipitated by adding dry pentane (8 mL) and then collected by filtration and washed thoroughly with dry pentane (2 x 8 mL) under a N<sub>2</sub> atmosphere. The solid was dried under high vacuum to give 4-CF<sub>3</sub>C<sub>6</sub>H<sub>4</sub>Ni(II)L1Br **90** as a brown powder (52%, 208 mg). The complex **90** is not sensitive to air, but it degrades slowly in the presence of moisture, and thus was stored in the glovebox at -30 °C. Attempts to obtain crystals suitable for X-ray crystallography were unsuccessful.

*Note:* Similar to previous reports,<sup>1</sup> the complex **90** is paramagnetic, <sup>1</sup>H and <sup>13</sup>C showed signal broadening.

EI calcd for [C<sub>41</sub>H<sub>54</sub>BrF<sub>3</sub>N<sub>4</sub>Ni]<sup>+</sup> [M]<sup>+</sup> 796.28319, found 796.3; HR-MS (EI) m/z calcd for C<sub>34</sub>H<sub>50</sub>BrN<sub>4</sub>Ni [M-CF<sub>3</sub>C<sub>6</sub>H<sub>4</sub>] 651.25723, found 651.25595; IR (film): ν (cm<sup>-1</sup>) 2960, 2905, 2873, 1600, 1582, 1524, 1489, 1452, 1428, 1394, 1320, 1303, 1279, 1240, 1152, 1109, 1092, 1068, 1010, 816, 789, 699.

*Note:* The results for EI and HR-MS (EI) were from two independent measurements. The EI measurement of complex **90** was performed with a resolution of 2300. With this resolution, the masses cannot be measured to 5 decimal places, but the measurement is more sensitive. For HR-MS (EI) measurements with a mass accuracy of 5 decimal places at least a resolution of > 6000 was needed. With this resolution, the signals in the 796.3 range were no longer detectable, but those of the [M-CF<sub>3</sub>C<sub>6</sub>H<sub>4</sub>] adduct.

## Stoichiometric Experiment with Aryl–Ni(II) Bromide Complex **90**

### General Procedure G (GP-G):

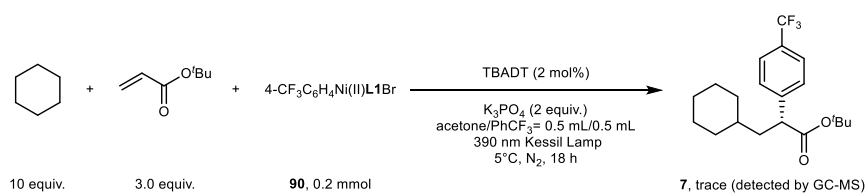

**GP-G:** In a nitrogen-filled glove box, a reaction vial (5 mL) equipped with a stirring bar was charged

with tetrabutylammonium decatungstate (TBADT, 0.004 mmol, 2 mol%), 4-CF<sub>3</sub>C<sub>6</sub>H<sub>4</sub>Ni(II)L1Br **90** (0.2 mmol, 1.0 equiv), anhydrous K<sub>3</sub>PO<sub>4</sub> (0.4 mmol, 2 equiv), cyclohexane (2 mmol, 10 equiv), *tert*-butyl acrylate (0.6 mmol, 3 equiv), dry acetone (0.5 mL), and dry  $\alpha,\alpha,\alpha$ -trifluorotoluene (0.5 mL). The vial was sealed and removed from the glovebox. The reaction mixture was pre-stirred for 20 min, then irradiated with a Kessil® PR160-390nm lamp at 5 °C with a distance of ~3 cm from the surface of the reaction vial. After 18 h of irradiation, the resulting mixture was passed through a pipette plug of Celite/silica gel and eluted with EtOAc. After concentration under reduced pressure, the mixture was analyzed by GC-MS.

## Catalytic Experiment with Aryl–Ni(II) Bromide Complex **90**

### General Procedure H (GP-H):

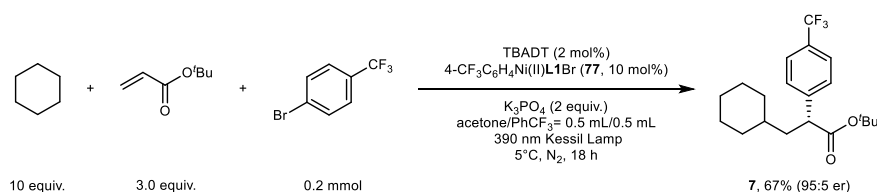

**GP-H:** In a nitrogen-filled glove box, a reaction vial (5 mL) equipped with a stirring bar was charged with tetrabutylammonium decatungstate (TBADT, 0.004 mmol, 2 mol%), 4-CF<sub>3</sub>C<sub>6</sub>H<sub>4</sub>Ni(II)L1Br **90** (0.01 mmol, 10 mol%), anhydrous K<sub>3</sub>PO<sub>4</sub> (0.4 mmol, 2 equiv), 1-bromo-4-(trifluoromethyl)benzene (0.2 mmol, 1.0 equiv), cyclohexane (2 mmol, 10 equiv), *tert*-butyl acrylate (0.6 mmol, 3 equiv), dry acetone (0.5 mL), and dry  $\alpha,\alpha,\alpha$ -trifluorotoluene (0.5 mL). The vial was sealed and removed from the glovebox. The reaction mixture was pre-stirred for 20 min, then irradiated with a Kessil® PR160-390nm lamp at 5 °C with a distance of ~3 cm from the surface of the reaction vial. After 18 h of irradiation, the resulting mixture was passed through a pipette plug of Celite/silica gel and eluted with EtOAc. After concentration under reduced pressure, the desired product was obtained as a white solid in 67% yield and 95:5 er.

### General Procedures for Laser Flash Photolysis

Laser flash photolysis (LFP) experiments were performed to study the decay of the reactive excited state of decatungstate (TBADT\*) in the presence of increasing concentrations of cyclohexane, *tert*-butyl acrylate and 4-bromobenzonitrile at 780 nm. The decay of the excited state of the decatungstate was observed in the presence of cyclohexane following linear Stern-Volmer behavior. In contrast, the decay of the reactive excited state of decatungstate by *tert*-butyl acrylate and 4-bromobenzonitrile could not be observed. The quenching constants for cyclohexane was obtained through relevant Stern-Volmer plots, and a bimolecular rate constant  $k_Q = 3.14 \times 10^7 \text{ M}^{-1} \cdot \text{s}^{-1}$  was calculated.

Nanosecond kinetics were studied using an Edinburgh Instruments LP 920 transient absorption setup. The probe beam, derived from a Xe Arc Lamp, was pulsed with a duration of 10 ms and attenuated with a long pass filter (Schott RG 610) before passing through the sample to minimize the sample's direct exposure to the probe light. The pump light pulses of 355 nm were obtained by third harmonic generation of the 1064 nm light from a Continuum Surelight Nd: YAG laser source. The excitation beam was overlapped in the sample at a 90° angle with respect to the probe light. A second long pass filter (Schott RG 1- cutoff also at 610 nm) placed behind the sample cuvette prevented scattered pump light from reaching the photomultiplier detector. The laser system was operated at a repetition rate of 10 Hz with a pulse duration of 10 ns. The excitation energy before

the sample was ~4.0 mJ /pulse. A limited number of shots i.e., 16 averaged scans, minimized permanent changes of the sample.

The starting solutions of TBADT (<sup>n</sup>Bu<sub>4</sub>N)<sub>4</sub>[W<sub>10</sub>O<sub>32</sub>] in CH<sub>3</sub>CN had a concentration of 2.0×10<sup>-4</sup> M and an optical density of 0.62 at 355 nm. The sample solutions were prepared in the glove box and sealed to prevent any contact with oxygen in a 1×1 cm quartz cell which was excited with single pulses from the laser. The resulting changes in absorption at 780 nm (Δλ= 10 nm) were recorded. The lifetimes of the reactive transient TBADT\* were determined by fitting the obtained decay profiles using the first-order equation (1) specified below.

$$y = y^0 + A \cdot e^{-x/\tau} \quad (1)$$

From decays reported in Supplementary Figure 2, it is possible to derive the Stern-Volmer plots shown in Supplementary Figure 3 following the equation (2):

$$\tau_0/\tau = 1 + \overbrace{k_Q \cdot \tau_0}^b \cdot [Q] \quad (2)$$

$$\tau_0 = 50.06 \times 10^{-9} \text{ s} \quad k_Q = 3.14 \times 10^7 \text{ M}^{-1} \cdot \text{s}^{-1}$$

## General Procedures for Cyclic Voltammetry Studies

Cyclic voltammetry experiments were performed in a three-electrode cell connected to nitrogen at room temperature. A working glass carbon electrode, platinum wire counter electrode, and Ag|AgCl reference electrode were employed. Anhydrous degassed CH<sub>3</sub>CN (5 mL) containing 1.0 mmol <sup>n</sup>Bu<sub>4</sub>NBF<sub>4</sub> were poured into the electrochemical cell in all experiments. The concentration of compounds is 3 mM. The scan rate is 100 mV/s. All cyclic voltammograms were normalized by adding 1.0 equiv freshly-sublimed ferrocene and collecting a new voltammogram. The ½ wave potential of the Fc/Fc<sup>+</sup> peak was identified and set to 0.0 V. Data was analyzed by subtracting a background current prior to identifying the maximum current (C<sub>p</sub>) and determining the potential (E<sub>p</sub>/2) at half this value (C<sub>p</sub>/2).<sup>2</sup> As shown in Supplementary Figure 10, two reductive peaks of **L1**NiBr<sub>2</sub> were observed at Ni<sup>II</sup>/Ni<sup>I</sup> = -1.44 V (vs Fc/Fc<sup>+</sup>) and Ni<sup>I</sup>/Ni<sup>0</sup> = -1.82 V (vs Fc/Fc<sup>+</sup>), and the reductive half-peak potential of **L1**NiBr<sub>2</sub> was measured as Ni<sup>II</sup>/Ni<sup>I</sup> = -1.25 V (vs Fc/Fc<sup>+</sup>) and Ni<sup>I</sup>/Ni<sup>0</sup> = -1.74 V (vs Fc/Fc<sup>+</sup>). Two reductive peaks of TBADT were observed at [W<sub>10</sub>O<sub>32</sub>]<sup>4-</sup>/[W<sub>10</sub>O<sub>32</sub>]<sup>5-</sup> = -1.37 V (vs Fc/Fc<sup>+</sup>) and [W<sub>10</sub>O<sub>32</sub>]<sup>5-</sup>/[W<sub>10</sub>O<sub>32</sub>]<sup>6-</sup> = -1.93 V (vs Fc/Fc<sup>+</sup>), and the reductive half-peak potential of TBADT was measured as [W<sub>10</sub>O<sub>32</sub>]<sup>4-</sup>/[W<sub>10</sub>O<sub>32</sub>]<sup>5-</sup> = -1.28 V (vs Fc/Fc<sup>+</sup>) and [W<sub>10</sub>O<sub>32</sub>]<sup>5-</sup>/[W<sub>10</sub>O<sub>32</sub>]<sup>6-</sup> = -1.85 V (vs Fc/Fc<sup>+</sup>).

## General Procedures for X-Ray Diffraction Analysis of Compound 1

The crystal was growth from EtOAc/*n*-hexane by liquid diffusion. Single crystal X-ray diffraction data were collected at 160(1) K on a Rigaku OD Synergy-Hypix diffractometer using the copper X-ray radiation (λ = 1.54184 Å) from a dual wavelength X-ray source and an Oxford Instruments Cryojet XL cooler. The selected suitable single crystal was mounted using polybutene oil on a flexible loop fixed on a goniometer head and immediately transferred to the diffractometer. Pre-experiment, data collection, data reduction and analytical absorption correction<sup>3</sup> were performed with the program suite *CrysAlisPro*.<sup>4</sup> Using *Olex2*,<sup>5</sup> the structure was solved with the *SHELXT*<sup>6</sup> small molecule structure solution program and refined with the *SHELXL* program package<sup>7</sup> by full-

matrix least-squares minimization on  $F^4$ . *PLATON*<sup>8</sup> was used to check the result of the X-ray analysis. For more details about the data collection and refinement parameters, see the CIF file. (Deposition Number 2268422). The title chiral compound crystallizes in the chiral space group  $P2_12_12_1$ . The configuration at the C1 carbon atom is R.

**Crystal Data** for  $C_{20}H_{27}NO_2$  ( $M = 313.42$  g/mol): orthorhombic, space group  $P2_12_12_1$  (no. 19),  $a = 5.56013(5)$  Å,  $b = 9.55435(7)$  Å,  $c = 34.0101(3)$  Å,  $V = 1806.74(3)$  Å<sup>3</sup>,  $Z = 4$ ,  $T = 160(1)$  K,  $\mu(\text{Cu K}\alpha) = 0.575$  mm<sup>-1</sup>,  $D_{\text{calc}} = 1.152$  g/cm<sup>3</sup>, 25290 reflections measured ( $5.196^\circ \leq 2\theta \leq 154.59^\circ$ ), 3809 unique ( $R_{\text{int}} = 0.0274$ ,  $R_{\text{sigma}} = 0.0140$ ) which were used in all calculations. The final  $R_1$  was 0.0270 ( $I > 2\sigma(I)$ ) and  $wR_2$  was 0.0726 (all data).

### Refinement model description

Number of restraints - 0, number of constraints - unknown.

Details:

1. Fixed Uiso

At 1.2 times of:

All C(H) groups, All C(H,H) groups

At 1.5 times of

All C(H,H,H) groups

2. a Ternary CH refined with riding coordinates:

C1(H1), C8(H8)

2. b Secondary CH2 refined with riding coordinates:

C7(H7A,H7B), C9(H9A,H9B), C10(H10A,H10B), C11(H11A,H11B), C12(H12A,H12B), C13(H13A,H13B)

2. c Aromatic/amide H refined with riding coordinates:

C15(H15), C16(H16), C18(H18), C19(H19)

2. d Idealised Me refined as rotating group:

C4(H4A,H4B,H4C), C5(H5A,H5B,H5C), C6(H6A,H6B,H6C)

*This report has been created with Olex2, compiled on 2022.04.12 svn.rca3783a0 for Rigaku Oxford Diffraction*

## Supplementary Discussion

### General Procedure I (GP-I): Evidence for excluding the process of product deracemization.

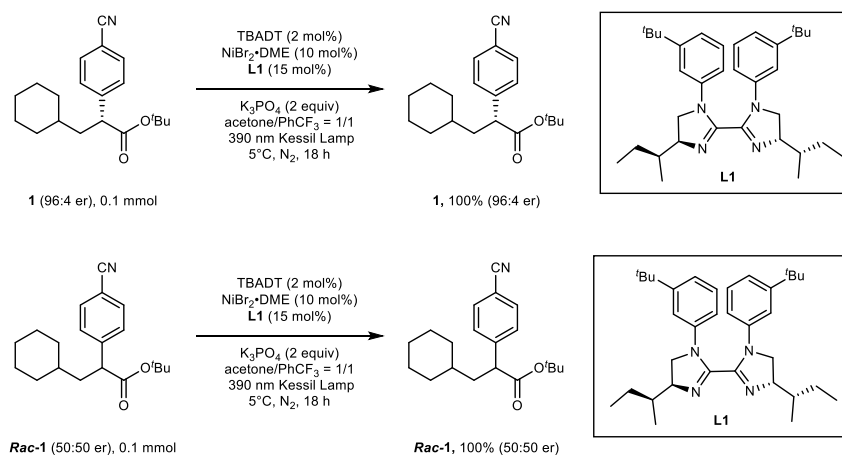

**GP-I:** In a nitrogen-filled glove box, a reaction vial (5 mL) equipped with a stirring bar was charged with tetrabutylammonium decatungstate (TBADT, 0.002 mmol, 2 mol%), NiBr<sub>2</sub>·DME (0.01 mmol, 10 mol%), (4*S*,4'*S*)-4,4'-di((*S*)-*sec*-butyl)-1,1'-bis(3-(*tert*-butyl)phenyl)-4,4',5,5'-tetrahydro-1*H*,1'*H*-2,2'-biimidazole (**L1**, 0.015 mmol, 15 mol%), anhydrous K<sub>3</sub>PO<sub>4</sub> (0.2 mmol, 2 equiv), *tert*-butyl (*R*)-2-(4-cyanophenyl)-3-cyclohexylpropanoate (**1**, 0.1 mmol, 1 equiv) or *tert*-butyl 2-(4-cyanophenyl)-3-cyclohexylpropanoate (**Rac-1**, 0.1 mmol, 1 equiv), dry acetone (0.5 mL), and dry  $\alpha,\alpha,\alpha$ -trifluorotoluene (0.5 mL). The vial was sealed and removed from the glovebox. The reaction mixture was pre-stirred for 20 min, then irradiated with a Kessil® PR160-390nm lamp at 5 °C with a distance of ~3 cm from the surface of the reaction vial. After 18 h of irradiation, the resulting mixture was passed through a pipette plug of Celite/silica gel and eluted with EtOAc. After concentration under reduced pressure, the crude mixture was purified by chromatography on silica gel.

### General Procedure J (GP-J): Evidence for excluding the process of Giese addition followed by enantioselective $\alpha$ -arylation.

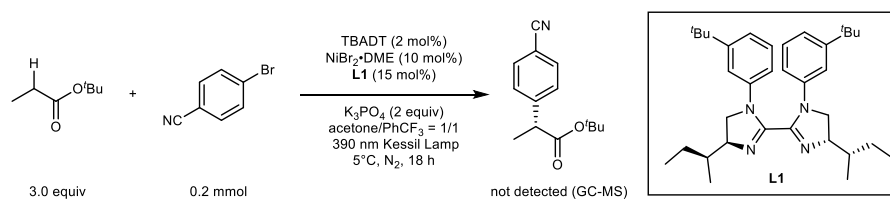

**GP-J:** In a nitrogen-filled glove box, a reaction vial (5 mL) equipped with a stirring bar was charged with tetrabutylammonium decatungstate (TBADT, 0.004 mmol, 2 mol%), NiBr<sub>2</sub>·DME (0.02 mmol, 10 mol%), (4*S*,4'*S*)-4,4'-di((*S*)-*sec*-butyl)-1,1'-bis(3-(*tert*-butyl)phenyl)-4,4',5,5'-tetrahydro-1*H*,1'*H*-2,2'-biimidazole (**L1**, 0.03 mmol, 15 mol%), anhydrous K<sub>3</sub>PO<sub>4</sub> (0.4 mmol, 2 equiv), *tert*-butyl propionate (0.2 mmol, 1 equiv), 4-bromobenzonitrile, dry acetone (0.5 mL), and dry  $\alpha,\alpha,\alpha$ -trifluorotoluene (0.5 mL). The vial was sealed and removed from the glovebox. The reaction mixture was pre-stirred for 20 min, then irradiated with a Kessil® PR160-390nm lamp at 5 °C with a distance of ~3 cm from the surface of the reaction vial. After 18 h of irradiation, the resulting mixture was passed through a pipette plug of Celite/silica gel and eluted with EtOAc. After concentration under reduced pressure, the mixture was analyzed by GC-MS.

**General Procedure K (GP-K): Evidence for excluding the process of atom transfer radical addition (ATRA) followed by asymmetric Ni-catalyzed aryl cross coupling.**

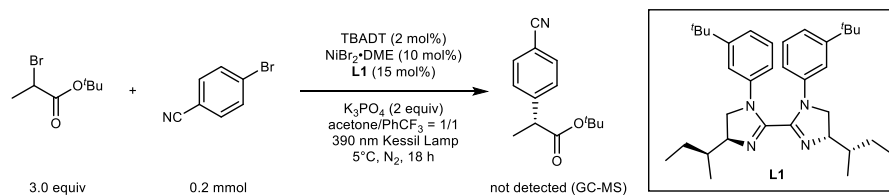

**GP-K:** In a nitrogen-filled glove box, a reaction vial (5 mL) equipped with a stirring bar was charged with tetrabutylammonium decatungstate (TBADT, 0.004 mmol, 2 mol%), NiBr<sub>2</sub>·DME (0.02 mmol, 10 mol%), (4*S*,4'*S*)-4,4'-di(*S*)-*sec*-butyl)-1,1'-bis(3-(*tert*-butyl)phenyl)-4,4',5,5'-tetrahydro-1*H*,1'*H*-2,2'-biimidazole (**L1**, 0.03 mmol, 15 mol%), anhydrous K<sub>3</sub>PO<sub>4</sub> (0.4 mmol, 2 equiv), *tert*-butyl 2-bromopropionate (0.2 mmol, 1 equiv), 4-bromobenzonitrile, dry acetone (0.5 mL), and dry  $\alpha,\alpha,\alpha$ -trifluorotoluene (0.5 mL). The vial was sealed and removed from the glovebox. The reaction mixture was pre-stirred for 20 min, then irradiated with a Kessil® PR160-390nm lamp at 5 °C with a distance of ~3 cm from the surface of the reaction vial. After 18 h of irradiation, the resulting mixture was passed through a pipette plug of Celite/silica gel and eluted with EtOAc. After concentration under reduced pressure, the mixture was analyzed by GC-MS.



## Supplementary Tables

**Supplementary Table 1.** Effect of chiral ligands on cyclohexane radical precursor<sup>a</sup>

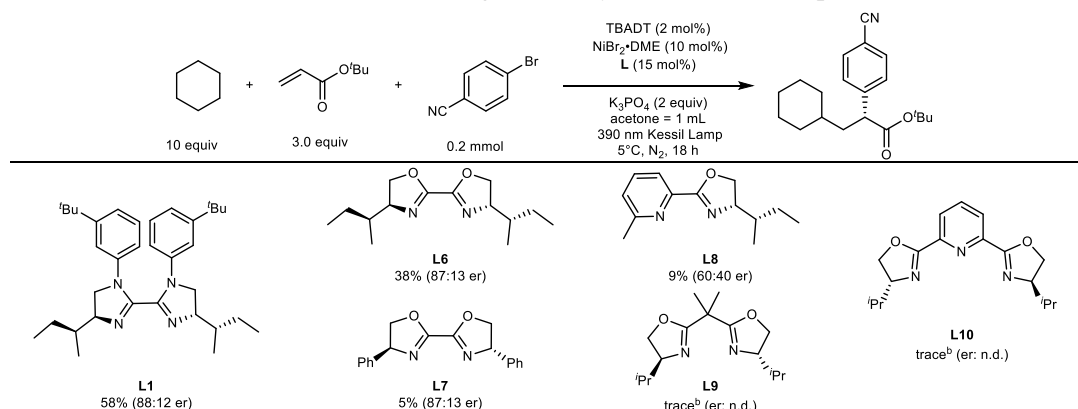

<sup>a</sup>Reactions conditions: cyclohexane (2 mmol, 10 equiv), 4-bromobenzonitrile (0.2 mmol, 1 equiv), *tert*-butyl acrylate (0.6 mmol, 3 equiv), TBADT (0.004 mmol, 2 mol %), NiBr<sub>2</sub>•DME (0.02 mmol, 10 mol%), Ligand (0.03 mmol, 15 mol%), K<sub>3</sub>PO<sub>4</sub> (0.4 mmol, 2 equiv), acetone = 1.0 mL, 40 W 390 nm Kessil Lamp, N<sub>2</sub>, 5 °C, 18 h. Isolated yields were shown. The enantiomeric ratio (er) values were determined by chiral HPLC. <sup>b</sup>Detected by GC-MS. n.d. = not determined.

**Supplementary Table 2.** Effect of solvent on cyclohexane radical precursor<sup>a</sup>

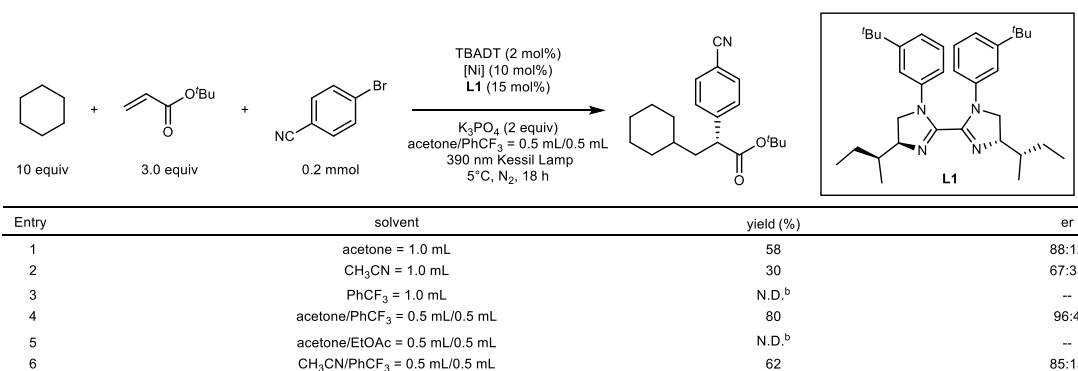

<sup>a</sup>Reactions conditions: cyclohexane (2 mmol, 10 equiv), 4-bromobenzonitrile (0.2 mmol, 1 equiv), *tert*-butyl acrylate (0.6 mmol, 3 equiv), TBADT (0.004 mmol, 2 mol %), NiBr<sub>2</sub>•DME (0.02 mmol, 10 mol%), L1 (0.03 mmol, 15 mol%), K<sub>3</sub>PO<sub>4</sub> (0.4 mmol, 2 equiv), solvent, 40 W 390 nm Kessil Lamp, N<sub>2</sub>, 5 °C, 18 h. Isolated yields were shown. The enantiomeric ratio (er) values were determined by chiral HPLC. <sup>b</sup>Detected by GC-MS. N.D.= not detected.

**Supplementary Table 3.** Effect of nickel sources on cyclohexane radical precursor<sup>a</sup>

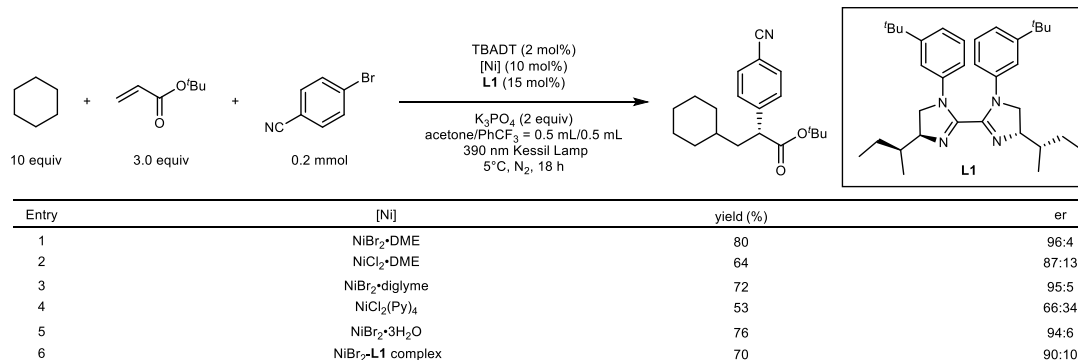

<sup>a</sup>Reactions conditions: cyclohexane (2 mmol, 10 equiv), 4-bromobenzonitrile (0.2 mmol, 1 equiv), *tert*-butyl acrylate (0.6 mmol, 3 equiv), TBADT (0.004 mmol, 2 mol %), NiBr<sub>2</sub>•DME (0.02 mmol, 10 mol%), L1 (0.03 mmol, 15 mol%), K<sub>3</sub>PO<sub>4</sub> (0.4 mmol, 2 equiv), acetone/PhCF<sub>3</sub> = 0.5 mL/0.5 mL, 40 W 390 nm Kessil Lamp, N<sub>2</sub>, 5 °C, 18 h. Isolated yields were shown. The enantiomeric ratio (er) values were determined by chiral HPLC.

**Supplementary Table 4.** Effect of nickel/ligand ratio and loading on cyclohexane radical precursor<sup>a</sup>

| Entry | x/y     | yield (%) | er   |
|-------|---------|-----------|------|
| 1     | 10/15   | 80        | 96:4 |
| 2     | 10/12   | 75        | 95:5 |
| 3     | 5/7.5   | 68        | 94:6 |
| 4     | 15/22.5 | 78        | 96:4 |

<sup>a</sup>Reactions conditions: cyclohexane (2 mmol, 10 equiv), 4-bromobenzonitrile (0.2 mmol, 1 equiv), *tert*-butyl acrylate (0.6 mmol, 3 equiv), TBADT (0.004 mmol, 2 mol %), NiBr<sub>2</sub>·DME (x mol%), L1 (y mol%), K<sub>3</sub>PO<sub>4</sub> (0.4 mmol, 2 equiv), acetone/PhCF<sub>3</sub> = 0.5 mL/0.5 mL, 40 W 390 nm Kessil Lamp, N<sub>2</sub>, 5 °C, 18 h. Isolated yields were shown. The enantiomeric ratio (er) values were determined by chiral HPLC.

**Supplementary Table 5.** Effect of chiral biimidazole ligands in PhCF<sub>3</sub>/acetone on cyclohexane radical precursor<sup>a</sup>

| Ligand | Yield (%)                                   | er |
|--------|---------------------------------------------|----|
| L1     | 80% (96:4 er)<br>71% (96:4 er) <sup>c</sup> |    |
| L2     | 81% (94:6 er)                               |    |
| L3     | 80% (90:10 er)                              |    |
| L4     | 86% (86:14 er)                              |    |
| L5     | 60% (97:3 er)<br>68% (97:3 er) <sup>c</sup> |    |
| L11    | trace <sup>b</sup> (er: n.d.)               |    |
| L12    | 60% (92:8 er)                               |    |
| L13    | 56% (16:84 er)                              |    |

<sup>a</sup>Reactions conditions: cyclohexane (2 mmol, 10 equiv), 4-bromobenzonitrile (0.2 mmol, 1 equiv), *tert*-butyl acrylate (0.6 mmol, 3 equiv), TBADT (0.004 mmol, 2 mol %), NiBr<sub>2</sub>·DME (0.02 mmol, 10 mol%), Ligand (0.03 mmol, 15 mol%), K<sub>3</sub>PO<sub>4</sub> (0.4 mmol, 2 equiv), acetone/PhCF<sub>3</sub> = 0.5 mL/0.5 mL, 40 W 390 nm Kessil Lamp, N<sub>2</sub>, 5 °C, 18 h. Isolated yields were shown. The enantiomeric ratio (er) values were determined by chiral HPLC. <sup>b</sup>Detected by GC-MS. n.d. = not determined. <sup>c</sup>Acetone/PhCF<sub>3</sub> = 1.0 mL/1.0 mL was used.

**Supplementary Table 6.** Effect of the amount of cyclohexane<sup>a</sup>

| Entry | x equiv | yield (%) | er   |
|-------|---------|-----------|------|
| 1     | 5       | 61        | 95:5 |
| 2     | 10      | 80        | 96:4 |
| 3     | 15      | 75        | 96:4 |

<sup>a</sup>Reactions conditions: cyclohexane (x equiv), 4-bromobenzonitrile (0.2 mmol, 1 equiv), *tert*-butyl acrylate (0.6 mmol, 3 equiv), TBADT (0.004 mmol, 2 mol %), NiBr<sub>2</sub>·DME (0.02mmol, 10 mol%), **L1** (0.03 mmol, 15 mol%), K<sub>3</sub>PO<sub>4</sub> (0.4 mmol, 2 equiv), acetone/PhCF<sub>3</sub> = 0.5 mL/0.5 mL, 40 W 390 nm Kessil Lamp, N<sub>2</sub>, 5 °C, 18 h. Isolated yields were shown. The enantiomeric ratio (er) values were determined by chiral HPLC.

**Supplementary Table 7.** Control experiments for cyclohexane radical precursor<sup>a</sup>

| Entry | variation from above conditions | yield (%)         | er   |
|-------|---------------------------------|-------------------|------|
| 1     | none                            | 80                | 96:4 |
| 2     | w/o light                       | N.D. <sup>b</sup> | --   |
| 3     | w/o TBADT                       | N.D. <sup>b</sup> | --   |
| 4     | w/o NiBr <sub>2</sub> ·DME      | N.D. <sup>b</sup> | --   |
| 5     | w/o <b>L1</b>                   | N.D. <sup>b</sup> | --   |

<sup>a</sup>Reactions conditions: cyclohexane (10 equiv), 4-bromobenzonitrile (0.2 mmol, 1 equiv), *tert*-butyl acrylate (0.6 mmol, 3 equiv), TBADT (0.004 mmol, 2 mol %), NiBr<sub>2</sub>·DME (0.02mmol, 10 mol%), **L1** (0.03 mmol, 15 mol%), K<sub>3</sub>PO<sub>4</sub> (0.4 mmol, 2 equiv), acetone/PhCF<sub>3</sub> = 0.5 mL/0.5 mL, 40 W 390 nm Kessil Lamp, N<sub>2</sub>, 5 °C, 18 h. Isolated yields were shown. The enantiomeric ratio (er) values were determined by chiral HPLC. <sup>b</sup>Detected by GC-MS. N.D. = not detected.

**Supplementary Table 8.** Effect of photocatalyst, ligand, base and solvent on isopropanol radical precursor<sup>a</sup>

| Entry | photocatalyst | ligand    | base                            | solvent                                   | yield (%)          | er   |
|-------|---------------|-----------|---------------------------------|-------------------------------------------|--------------------|------|
| 1     | PC I          | <b>L1</b> | K <sub>3</sub> PO <sub>4</sub>  | PhCF <sub>3</sub> /acetone= 0.5 mL/0.5 mL | trace <sup>b</sup> | --   |
| 2     | PC I          | <b>L1</b> | Na <sub>2</sub> CO <sub>3</sub> | PhCF <sub>3</sub> /acetone= 0.5 mL/0.5 mL | 44                 | 93:7 |
| 3     | PC I          | <b>L1</b> | Na <sub>2</sub> CO <sub>3</sub> | PhCF <sub>3</sub> /acetone= 1.0 mL/1.0 mL | 80                 | 91:9 |
| 4     | PC I          | <b>L5</b> | Na <sub>2</sub> CO <sub>3</sub> | PhCF <sub>3</sub> /acetone= 1.0 mL/1.0 mL | 85                 | 96:4 |
| 5     | PC I          | <b>L5</b> | Na <sub>2</sub> CO <sub>3</sub> | EtOAc= 2.0 mL                             | 81                 | 94:6 |
| 6     | PC II         | <b>L5</b> | Na <sub>2</sub> CO <sub>3</sub> | PhCF <sub>3</sub> /acetone= 1.0 mL/1.0 mL | 85                 | 94:6 |

<sup>a</sup>Reactions conditions: isopropanol (10 equiv), 4-bromobenzonitrile (0.2 mmol, 1 equiv), *tert*-butyl acrylate (0.6 mmol, 3 equiv), photocatalyst (0.04 mmol, 20 mol %), NiBr<sub>2</sub>·DME (0.02 mmol, 10 mol%), ligand (0.03 mmol, 15 mol%), base (0.4 mmol, 2 equiv), solvent, 40 W 390 nm Kessil Lamp, N<sub>2</sub>, 5 °C, 18 h. Isolated yield. Isolated yields were shown. The enantiomeric ratio (er) values were determined by chiral HPLC. <sup>b</sup>Detected by GC-MS.

### Supplementary Table 9. Unsuccessful examples<sup>a</sup>

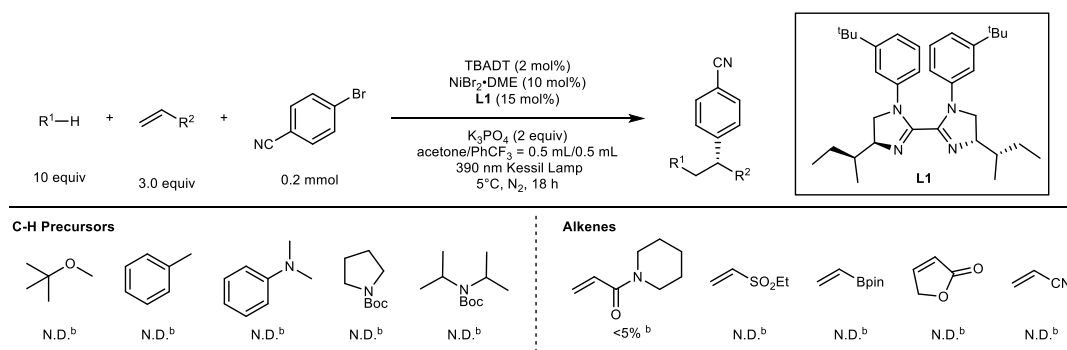

<sup>a</sup>Reactions conditions: C-H precursor (10 equiv), 4-bromobenzonitrile (0.2 mmol, 1 equiv), alkene (0.6 mmol, 3 equiv), TBADT (0.004 mmol, 2 mol %), NiBr<sub>2</sub>·DME (0.02mmol, 10 mol%), L1 (0.03 mmol, 15 mol%), K<sub>3</sub>PO<sub>4</sub> (0.4 mmol, 2 equiv), acetone/PhCF<sub>3</sub> = 0.5 mL/0.5 mL, 40 W 390 nm Kessil Lamp, N<sub>2</sub>, 5 °C, 18 h. <sup>b</sup>Detected by GC-MS. N.D. = not detected.

### Supplementary Table 10. X-Ray structure and crystal data of compound 1.

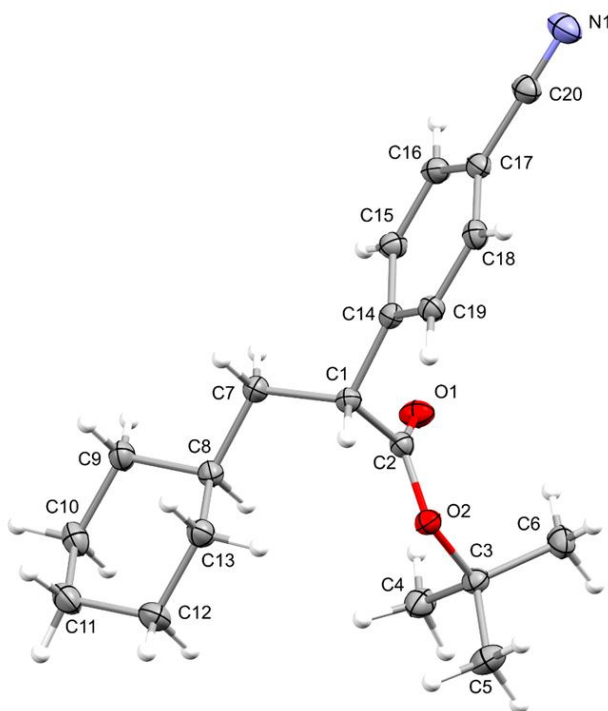

### Crystal data and structure refinement for compound 1

|                                                              |                                                                              |
|--------------------------------------------------------------|------------------------------------------------------------------------------|
| Crystallised from                                            | EtOAc / <i>n</i> -hexane                                                     |
| Identification code                                          | xia2408                                                                      |
| Empirical formula                                            | C <sub>20</sub> H <sub>27</sub> NO <sub>2</sub>                              |
| Formula weight                                               | 313.42                                                                       |
| Temperature/K                                                | 160(1)                                                                       |
| Crystal system                                               | orthorhombic                                                                 |
| Space group                                                  | <i>P</i> 2 <sub>1</sub> 2 <sub>1</sub> 2 <sub>1</sub>                        |
| <i>a</i> /Å                                                  | 5.56013(5)                                                                   |
| <i>b</i> /Å                                                  | 9.55435(7)                                                                   |
| <i>c</i> /Å                                                  | 34.0101(3)                                                                   |
| $\alpha$ /°                                                  | 90                                                                           |
| $\beta$ /°                                                   | 90                                                                           |
| $\gamma$ /°                                                  | 90                                                                           |
| Volume/Å <sup>3</sup>                                        | 1806.74(3)                                                                   |
| <i>Z</i>                                                     | 4                                                                            |
| $\rho_{\text{calc}}/\text{cm}^3$                             | 1.152                                                                        |
| $\mu/\text{mm}^{-1}$                                         | 0.575                                                                        |
| F(000)                                                       | 680.0                                                                        |
| Crystal size/mm <sup>3</sup>                                 | 0.23 × 0.1 × 0.07                                                            |
| Radiation                                                    | Cu K $\alpha$ ( $\lambda$ = 1.54184)                                         |
| 2 $\Theta$ range for data collection/°                       | 5.196 to 154.59                                                              |
| Index ranges                                                 | -7 ≤ <i>h</i> ≤ 7, -12 ≤ <i>k</i> ≤ 9, -42 ≤ <i>l</i> ≤ 43                   |
| Reflections collected                                        | 25290                                                                        |
| Independent reflections                                      | 3809 [ <i>R</i> <sub>int</sub> = 0.0274, <i>R</i> <sub>sigma</sub> = 0.0140] |
| Data/restraints/parameters                                   | 3809/0/212                                                                   |
| Goodness-of-fit on F <sup>2</sup>                            | 1.020                                                                        |
| Final <i>R</i> indexes [ <i>I</i> ≥ 2 $\sigma$ ( <i>I</i> )] | <i>R</i> <sub>1</sub> = 0.0270, <i>wR</i> <sub>2</sub> = 0.0720              |
| Final <i>R</i> indexes [all data]                            | <i>R</i> <sub>1</sub> = 0.0276, <i>wR</i> <sub>2</sub> = 0.0726              |
| Largest diff. peak/hole / e Å <sup>-3</sup>                  | 0.14/-0.11                                                                   |
| Flack parameter                                              | -0.02(5)                                                                     |

**Supplementary Table 11.** Fractional Atomic Coordinates ( $\times 10^4$ ) and Equivalent Isotropic Displacement Parameters ( $\text{\AA}^2 \times 10^3$ ) for xia2408.  $U_{\text{eq}}$  is defined as 1/3 of the trace of the orthogonalised  $U_{ij}$  tensor.

| Atom | <i>x</i>   | <i>y</i>    | <i>z</i>  | <b>U(eq)</b> |
|------|------------|-------------|-----------|--------------|
| C1   | 6696(2)    | 6608.4(13)  | 3949.6(4) | 28.0(3)      |
| C2   | 4853(2)    | 6942.2(13)  | 3631.9(4) | 28.3(3)      |
| C3   | 4498(3)    | 7334.5(14)  | 2920.6(4) | 31.3(3)      |
| C4   | 2873(3)    | 6087.6(16)  | 2848.3(4) | 41.4(4)      |
| C5   | 6448(3)    | 7404(2)     | 2607.9(4) | 44.4(4)      |
| C6   | 3118(3)    | 8698.2(17)  | 2945.3(5) | 44.7(4)      |
| C7   | 6208(3)    | 5116.2(14)  | 4104.8(4) | 32.1(3)      |
| C8   | 6386(3)    | 3972.0(13)  | 3791.1(4) | 30.4(3)      |
| C9   | 5698(3)    | 2549.7(14)  | 3964.9(4) | 35.9(3)      |
| C10  | 5835(3)    | 1382.9(15)  | 3658.8(5) | 41.7(3)      |
| C11  | 8318(3)    | 1305.6(17)  | 3473.6(5) | 45.3(4)      |
| C12  | 9049(3)    | 2717.1(17)  | 3300.9(5) | 43.8(4)      |
| C13  | 8893(3)    | 3880.4(15)  | 3607.9(4) | 36.7(3)      |
| C14  | 6591(2)    | 7720.8(13)  | 4267.4(4) | 27.8(3)      |
| C15  | 4639(3)    | 7831.8(15)  | 4523.7(4) | 32.6(3)      |
| C16  | 4531(3)    | 8903.4(15)  | 4798.4(4) | 34.0(3)      |
| C17  | 6383(3)    | 9882.9(14)  | 4817.6(4) | 31.5(3)      |
| C18  | 8370(3)    | 9769.8(14)  | 4570.1(4) | 32.9(3)      |
| C19  | 8457(2)    | 8685.5(14)  | 4298.7(4) | 30.8(3)      |
| C20  | 6214(3)    | 11033.7(15) | 5091.8(4) | 35.9(3)      |
| N1   | 6055(3)    | 11943.7(15) | 5310.4(4) | 48.0(3)      |
| O1   | 2719.0(18) | 7020.6(12)  | 3689.4(3) | 38.6(3)      |
| O2   | 5925.5(17) | 7108.4(10)  | 3282.6(2) | 30.1(2)      |

**Supplementary Table 12.** Anisotropic Displacement Parameters ( $\text{\AA}^2 \times 10^3$ ) for xia2408. The Anisotropic displacement factor exponent takes the form:  $-2\pi^2[h^2a^{*2}U_{11}+2hka^*b^*U_{12}+\dots]$ .

| Atom | $U_{11}$ | $U_{22}$ | $U_{33}$ | $U_{23}$ | $U_{13}$ | $U_{12}$ |
|------|----------|----------|----------|----------|----------|----------|
| C1   | 29.6(6)  | 27.4(6)  | 27.1(6)  | -0.2(5)  | 2.0(5)   | 0.0(5)   |
| C2   | 32.3(6)  | 24.4(6)  | 28.3(6)  | -2.0(5)  | 2.0(5)   | -0.8(5)  |
| C3   | 35.7(7)  | 31.6(6)  | 26.5(6)  | 1.4(5)   | -3.2(5)  | 0.0(6)   |
| C4   | 50.6(9)  | 38.6(8)  | 34.8(7)  | -0.6(6)  | -5.6(7)  | -9.0(7)  |
| C5   | 42.3(8)  | 60.7(10) | 30.1(7)  | 7.4(7)   | 0.2(6)   | -1.4(8)  |
| C6   | 55.6(10) | 35.5(7)  | 43.0(8)  | -0.2(6)  | -11.3(7) | 9.5(7)   |
| C7   | 40.1(7)  | 27.7(6)  | 28.5(6)  | 1.1(5)   | 2.9(6)   | 1.0(6)   |
| C8   | 34.9(7)  | 26.6(6)  | 29.6(6)  | 0.0(5)   | -1.1(5)  | 2.1(6)   |
| C9   | 40.7(8)  | 27.5(6)  | 39.5(7)  | 0.9(5)   | 3.3(6)   | -0.1(6)  |
| C10  | 45.6(8)  | 27.9(6)  | 51.5(9)  | -4.3(6)  | -4.2(7)  | 2.1(6)   |
| C11  | 50.6(9)  | 35.0(7)  | 50.2(9)  | -8.8(7)  | -0.9(7)  | 9.5(7)   |
| C12  | 48.8(9)  | 43.8(8)  | 38.9(8)  | -6.1(6)  | 6.8(7)   | 8.2(7)   |
| C13  | 39.2(7)  | 34.1(7)  | 36.9(7)  | -2.6(6)  | 6.0(6)   | 0.1(6)   |
| C14  | 31.6(6)  | 25.9(6)  | 25.8(6)  | 2.0(5)   | -1.7(5)  | 2.6(5)   |
| C15  | 34.1(7)  | 33.4(7)  | 30.2(6)  | -0.5(5)  | 1.8(5)   | -2.9(6)  |
| C16  | 35.1(7)  | 39.0(7)  | 28.0(6)  | -1.2(5)  | 3.3(5)   | 1.8(6)   |
| C17  | 37.8(7)  | 29.4(6)  | 27.3(6)  | -1.0(5)  | -4.1(5)  | 5.8(6)   |
| C18  | 34.4(7)  | 27.6(6)  | 36.5(7)  | 0.1(5)   | -2.4(6)  | -1.1(6)  |
| C19  | 31.3(6)  | 29.3(6)  | 31.9(6)  | 0.4(5)   | 2.6(5)   | 1.3(5)   |
| C20  | 37.6(7)  | 36.2(7)  | 33.7(7)  | -3.6(6)  | -3.6(6)  | 4.8(6)   |
| N1   | 52.7(8)  | 46.4(7)  | 45.0(7)  | -14.5(6) | -3.0(6)  | 7.6(7)   |
| O1   | 30.4(5)  | 52.6(6)  | 32.9(5)  | -2.8(5)  | 2.1(4)   | 1.8(5)   |
| O2   | 31.3(5)  | 33.0(5)  | 26.0(4)  | 2.2(3)   | 0.1(4)   | 0.7(4)   |

**Supplementary Table 13.** Bond Lengths for xia2408.

| Atom Atom Length/Å |     |            | Atom Atom Length/Å |     |            |
|--------------------|-----|------------|--------------------|-----|------------|
| C1                 | C2  | 1.5231(18) | C9                 | C10 | 1.527(2)   |
| C1                 | C7  | 1.5443(18) | C10                | C11 | 1.519(2)   |
| C1                 | C14 | 1.5170(17) | C11                | C12 | 1.526(2)   |
| C2                 | O1  | 1.2049(17) | C12                | C13 | 1.527(2)   |
| C2                 | O2  | 1.3388(15) | C14                | C15 | 1.3958(19) |
| C3                 | C4  | 1.515(2)   | C14                | C19 | 1.392(2)   |
| C3                 | C5  | 1.520(2)   | C15                | C16 | 1.3873(19) |
| C3                 | C6  | 1.514(2)   | C16                | C17 | 1.393(2)   |
| C3                 | O2  | 1.4807(16) | C17                | C18 | 1.393(2)   |
| C7                 | C8  | 1.5308(17) | C17                | C20 | 1.4447(18) |
| C8                 | C9  | 1.5306(18) | C18                | C19 | 1.3884(19) |
| C8                 | C13 | 1.529(2)   | C20                | N1  | 1.1474(19) |

**Supplementary Table 14.** Bond Angles for xia2408.

| Atom Atom Atom Angle/° |    |    |            | Atom Atom Atom Angle/° |     |     |            |
|------------------------|----|----|------------|------------------------|-----|-----|------------|
| C2                     | C1 | C7 | 108.52(11) | C11                    | C10 | C9  | 111.31(13) |
| C14                    | C1 | C2 | 109.44(10) | C10                    | C11 | C12 | 111.02(13) |
| C14                    | C1 | C7 | 113.36(10) | C11                    | C12 | C13 | 111.40(12) |
| O1                     | C2 | C1 | 124.08(12) | C12                    | C13 | C8  | 111.83(13) |
| O1                     | C2 | O2 | 125.13(13) | C15                    | C14 | C1  | 121.88(12) |
| O2                     | C2 | C1 | 110.78(11) | C19                    | C14 | C1  | 119.31(12) |
| C4                     | C3 | C5 | 110.24(12) | C19                    | C14 | C15 | 118.78(12) |
| C6                     | C3 | C4 | 112.55(13) | C16                    | C15 | C14 | 120.68(13) |
| C6                     | C3 | C5 | 111.26(13) | C15                    | C16 | C17 | 119.70(13) |
| O2                     | C3 | C4 | 109.86(11) | C16                    | C17 | C18 | 120.38(12) |
| O2                     | C3 | C5 | 101.87(11) | C16                    | C17 | C20 | 119.58(13) |
| O2                     | C3 | C6 | 110.54(11) | C18                    | C17 | C20 | 120.03(13) |
| C8                     | C7 | C1 | 114.18(10) | C19                    | C18 | C17 | 119.16(13) |
| C9                     | C8 | C7 | 110.40(11) | C18                    | C19 | C14 | 121.25(13) |
| C13                    | C8 | C7 | 112.57(12) | N1                     | C20 | C17 | 179.25(18) |
| C13                    | C8 | C9 | 109.54(11) | C2                     | O2  | C3  | 121.09(11) |
| C10                    | C9 | C8 | 111.86(12) |                        |     |     |            |



**Supplementary Table 15.** Torsion Angles for xia2408.

| <b>A</b> | <b>B</b> | <b>C</b> | <b>D</b> | <b>Angle/°</b> | <b>A</b> | <b>B</b> | <b>C</b> | <b>D</b> | <b>Angle/°</b> |
|----------|----------|----------|----------|----------------|----------|----------|----------|----------|----------------|
| C1       | C2       | O2       | C3       | 175.33(10)     | C9       | C8       | C13      | C12      | 55.76(16)      |
| C1       | C7       | C8       | C9       | -175.89(12)    | C9       | C10      | C11      | C12      | -54.92(18)     |
| C1       | C7       | C8       | C13      | 61.35(16)      | C10      | C11      | C12      | C13      | 54.78(19)      |
| C1       | C14      | C15      | C16      | -176.64(12)    | C11      | C12      | C13      | C8       | -55.88(18)     |
| C1       | C14      | C19      | C18      | 176.25(12)     | C13      | C8       | C9       | C10      | -55.96(16)     |
| C2       | C1       | C7       | C8       | 60.07(15)      | C14      | C1       | C2       | O1       | -60.57(17)     |
| C2       | C1       | C14      | C15      | 70.17(15)      | C14      | C1       | C2       | O2       | 120.56(11)     |
| C2       | C1       | C14      | C19      | -108.01(13)    | C14      | C1       | C7       | C8       | -178.13(12)    |
| C4       | C3       | O2       | C2       | -61.00(16)     | C14      | C15      | C16      | C17      | 0.3(2)         |
| C5       | C3       | O2       | C2       | -177.87(12)    | C15      | C14      | C19      | C18      | -1.99(19)      |
| C6       | C3       | O2       | C2       | 63.80(16)      | C15      | C16      | C17      | C18      | -1.8(2)        |
| C7       | C1       | C2       | O1       | 63.60(17)      | C15      | C16      | C17      | C20      | 177.23(13)     |
| C7       | C1       | C2       | O2       | -115.27(11)    | C16      | C17      | C18      | C19      | 1.3(2)         |
| C7       | C1       | C14      | C15      | -51.11(17)     | C17      | C18      | C19      | C14      | 0.6(2)         |
| C7       | C1       | C14      | C19      | 130.70(13)     | C19      | C14      | C15      | C16      | 1.55(19)       |
| C7       | C8       | C9       | C10      | 179.52(12)     | C20      | C17      | C18      | C19      | -177.65(12)    |
| C7       | C8       | C13      | C12      | 179.00(11)     | O1       | C2       | O2       | C3       | -3.5(2)        |
| C8       | C9       | C10      | C11      | 56.32(17)      |          |          |          |          |                |

**Supplementary Table 16.** Hydrogen Atom Coordinates ( $\text{\AA}\times 10^4$ ) and Isotropic Displacement Parameters ( $\text{\AA}^2\times 10^3$ ) for xia2408.

| Atom | <i>x</i> | <i>y</i> | <i>z</i> | U(eq) |
|------|----------|----------|----------|-------|
| H1   | 8334.37  | 6626.35  | 3828.43  | 34    |
| H4A  | 3800.6   | 5221.75  | 2877.85  | 62    |
| H4B  | 2215.83  | 6138.77  | 2581.34  | 62    |
| H4C  | 1551.9   | 6095.74  | 3039.03  | 62    |
| H5A  | 7543.33  | 8179.5   | 2666.73  | 67    |
| H5B  | 5707.14  | 7554.24  | 2349.8   | 67    |
| H5C  | 7349.43  | 6522.64  | 2605.42  | 67    |
| H6A  | 1886.36  | 8626.4   | 3150.38  | 67    |
| H6B  | 2347.33  | 8889.72  | 2691.83  | 67    |
| H6C  | 4228.64  | 9461.17  | 3009.71  | 67    |
| H7A  | 7373.49  | 4906.46  | 4316.86  | 39    |
| H7B  | 4577.1   | 5090.45  | 4221.44  | 39    |
| H8   | 5214.34  | 4198.51  | 3577.33  | 36    |
| H9A  | 6793.67  | 2327.37  | 4185.7   | 43    |
| H9B  | 4041.13  | 2600.32  | 4070.63  | 43    |
| H10A | 5455.08  | 476.34   | 3785.39  | 50    |
| H10B | 4621.67  | 1553.79  | 3451.27  | 50    |
| H11A | 8316.6   | 589.45   | 3263.27  | 54    |
| H11B | 9505.36  | 1019.34  | 3675.06  | 54    |
| H12A | 7981.39  | 2945.62  | 3076.99  | 53    |
| H12B | 10716.77 | 2657.04  | 3200.42  | 53    |
| H13A | 9292.67  | 4786.53  | 3482.71  | 44    |
| H13B | 10091.13 | 3703.64  | 3817.44  | 44    |
| H15  | 3372.03  | 7166.59  | 4509.91  | 39    |
| H16  | 3200.07  | 8968.89  | 4972.57  | 41    |
| H18  | 9649.36  | 10426.16 | 4586.84  | 39    |
| H19  | 9816.19  | 8600.33  | 4131.1   | 37    |

## Supplementary Figures

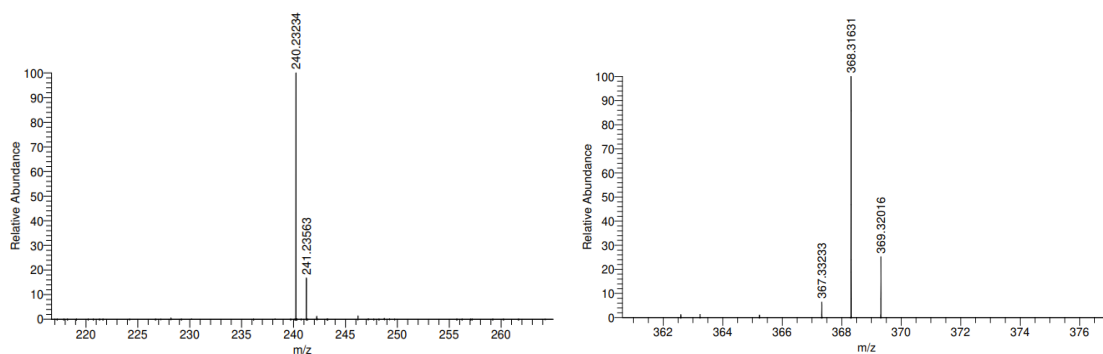

**Supplementary Figure 1.** HR-MS for radical capture experiment.

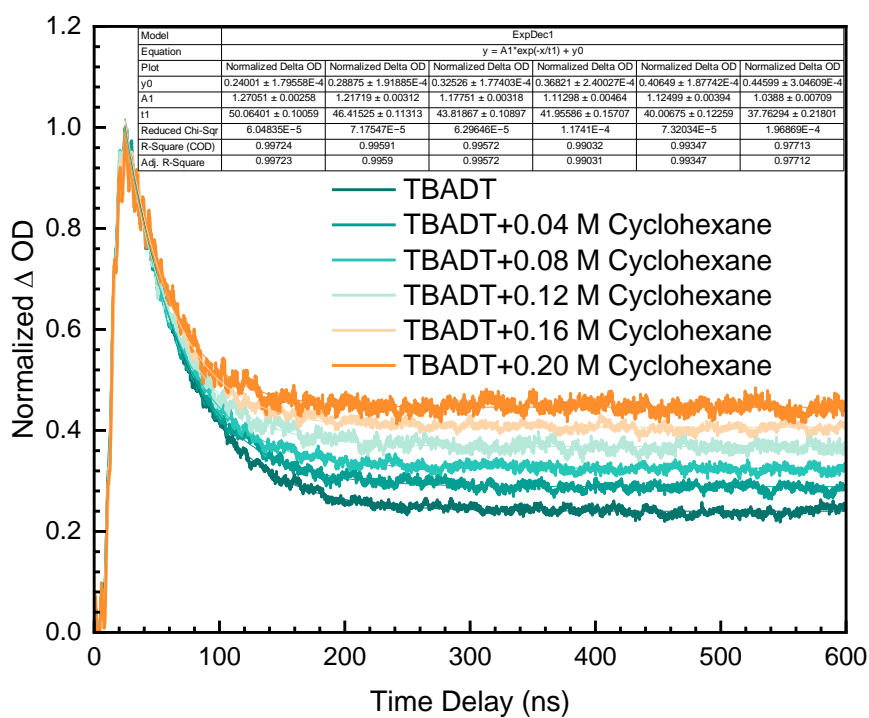

**Supplementary Figure 2.** Decay profiles and first order fitting of TBADT ( $2.0 \times 10^{-4}$  M in  $\text{CH}_3\text{CN}$ ) upon addition of increasing amounts of cyclohexane.

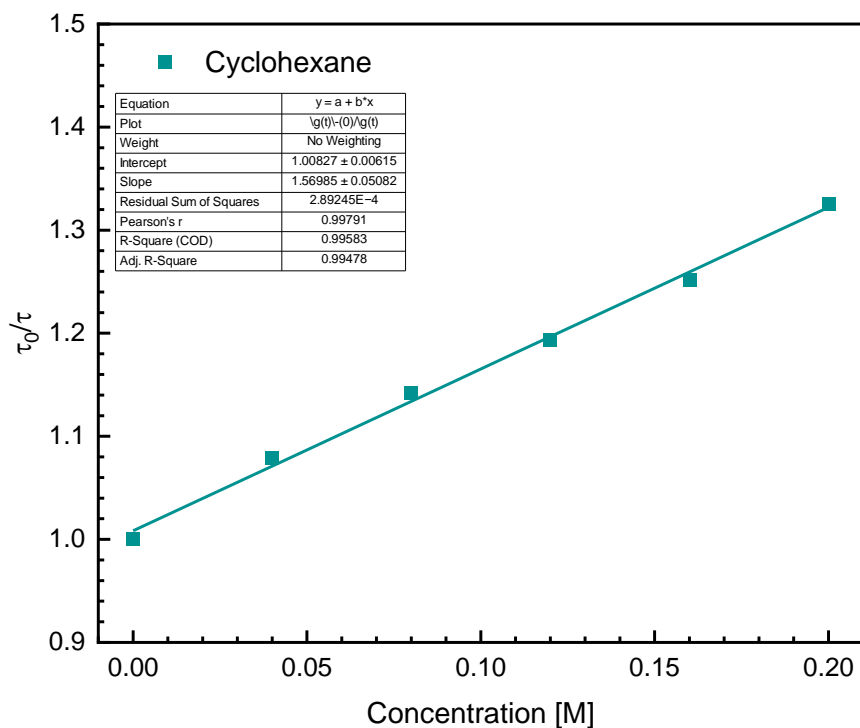

**Supplementary Figure 3.** Stern-Volmer plots of TBADT ( $2.0 \times 10^{-4}$  M in  $\text{CH}_3\text{CN}$ ) by cyclohexane.

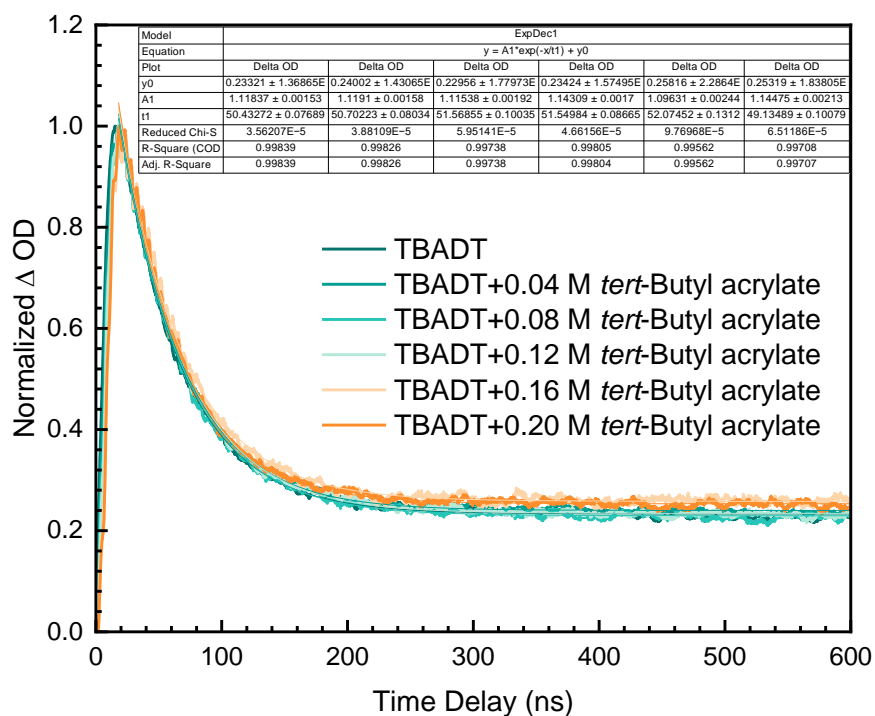

**Supplementary Figure 4.** Decay profiles and first order fitting of TBADT ( $2.0 \times 10^{-4}$  M in  $\text{CH}_3\text{CN}$ ) upon addition of increasing amounts of *tert*-butyl acrylate.

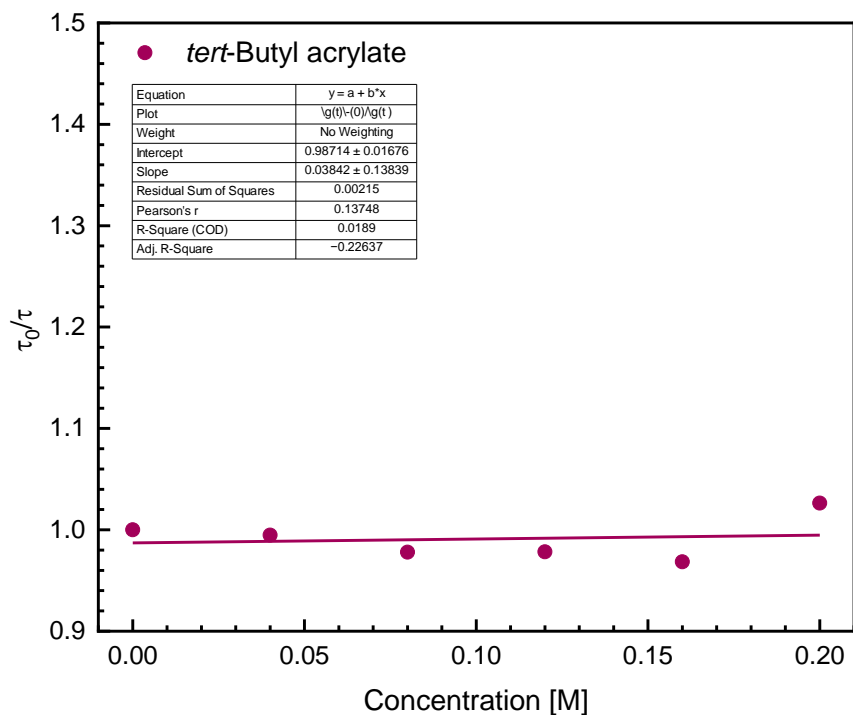

**Supplementary Figure 5.** Stern-Volmer plots of TBADT ( $2.0 \times 10^{-4}$  M in  $\text{CH}_3\text{CN}$ ) by *tert*-butyl acrylate.

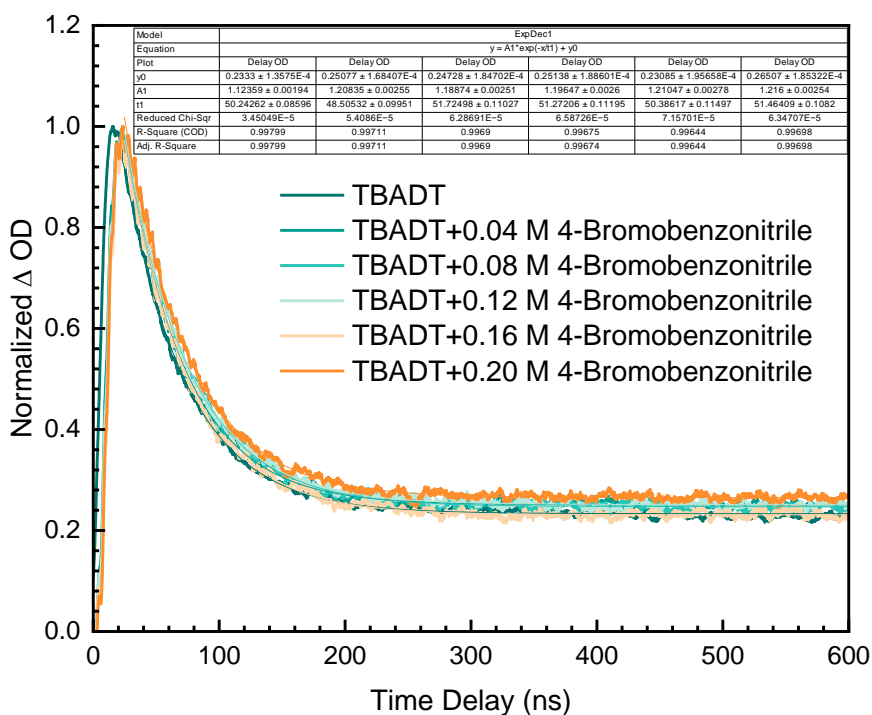

**Supplementary Figure 6.** Decay profiles and first order fitting of TBADT ( $2.0 \times 10^{-4}$  M in  $\text{CH}_3\text{CN}$ ) upon addition of increasing amounts of 4-bromobenzonitrile.

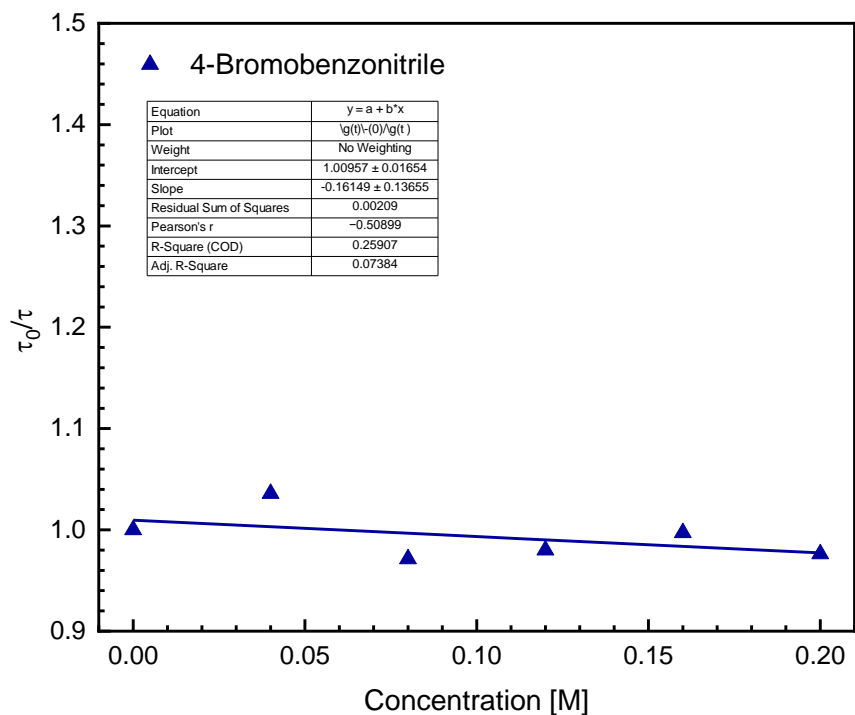

**Supplementary Figure 7.** Stern-Volmer plots of TBADT ( $2.0 \times 10^{-4}$  M in  $\text{CH}_3\text{CN}$ ) by 4-bromobenzonitrile.

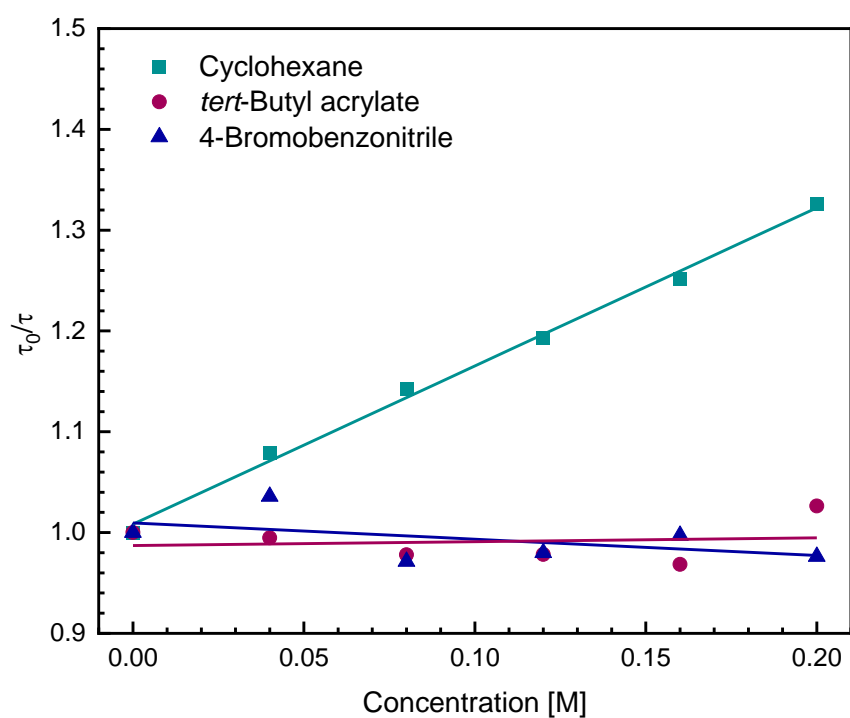

**Supplementary Figure 8.** Stern-Volmer studies of TBADT ( $2.0 \times 10^{-4}$  M in  $\text{CH}_3\text{CN}$ ) by cyclohexane, *tert*-butyl acrylate, and 4-bromobenzonitrile.

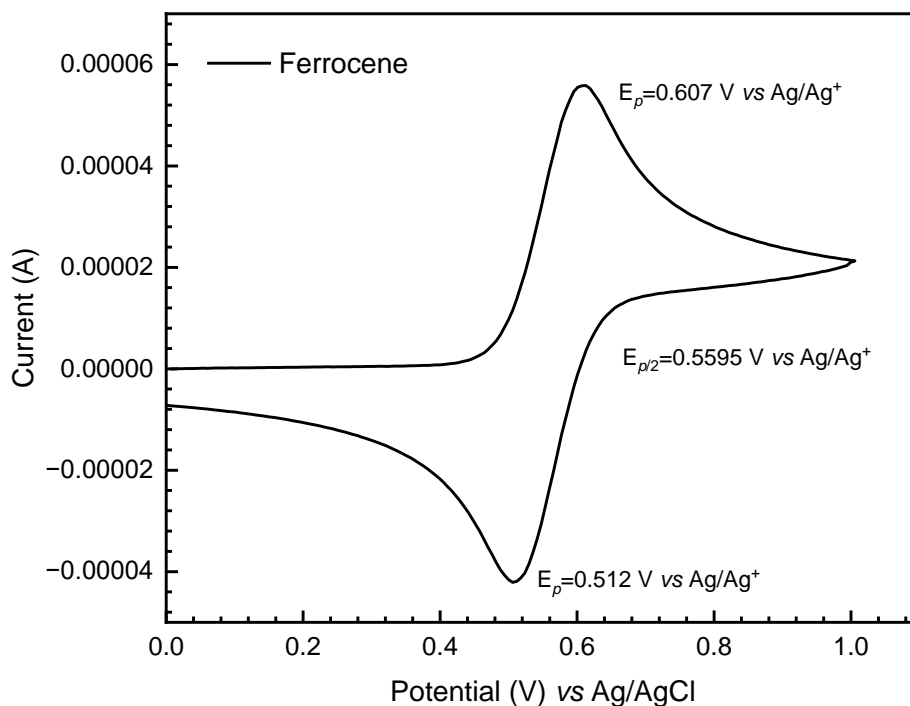

**Supplementary Figure 9.** Cyclic voltammograms of ferrocene.

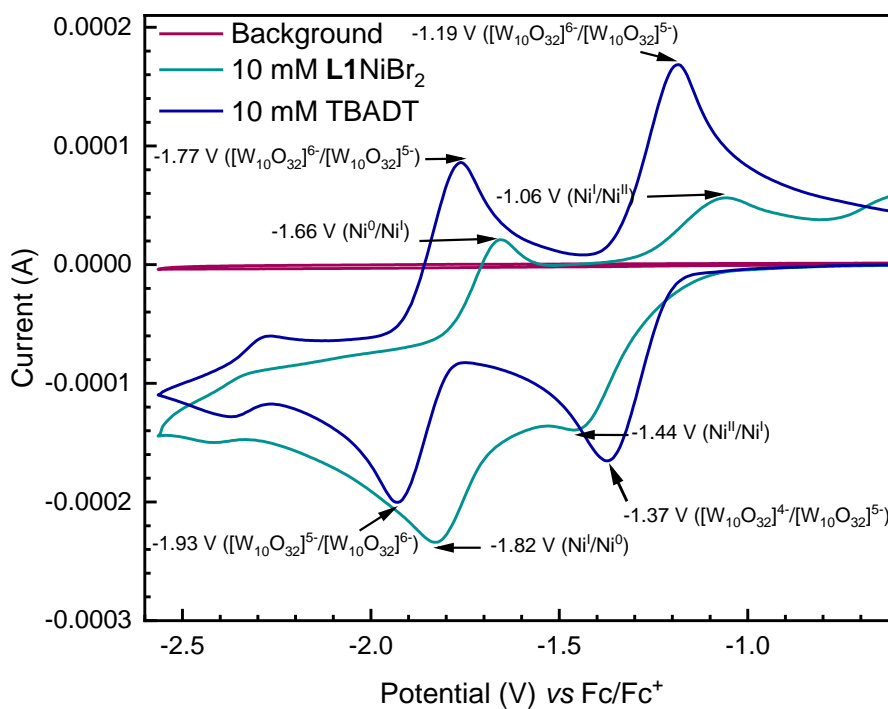

**Supplementary Figure 10.** Cyclic voltammograms of TBADT and L1NiBr<sub>2</sub> in CH<sub>3</sub>CN at 1 V/s scan rate.

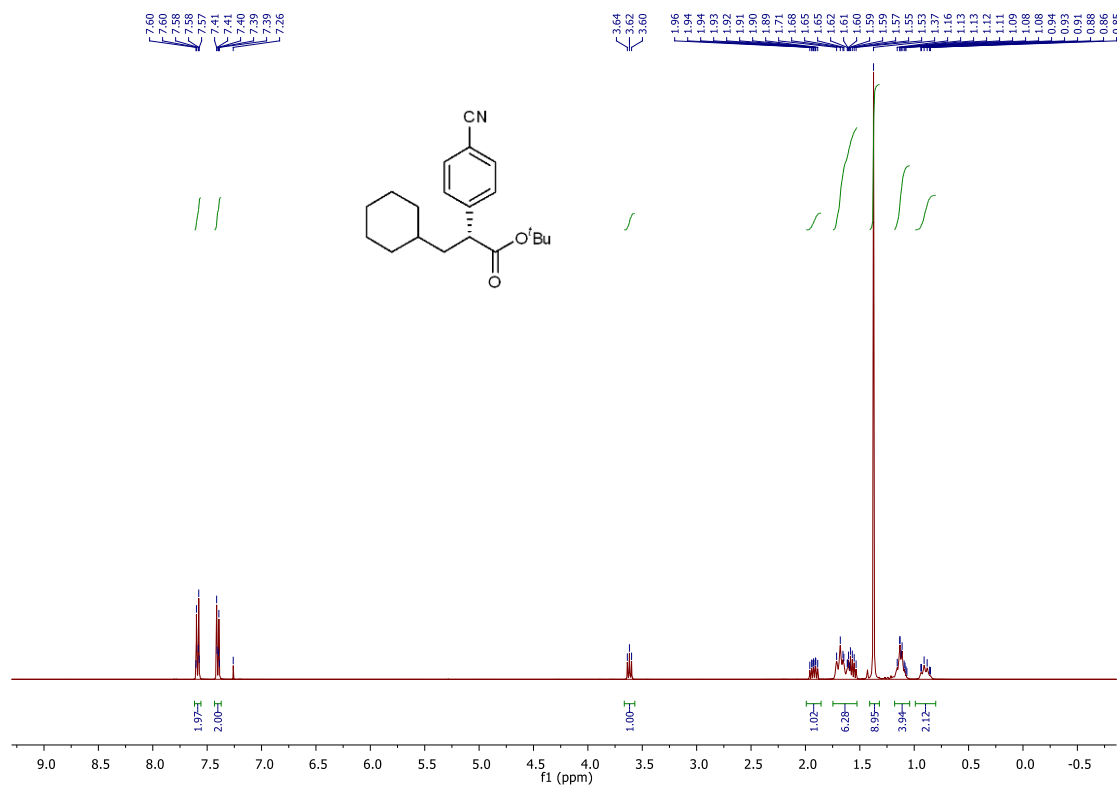

Supplementary Figure 11. <sup>1</sup>H NMR of compound 1.

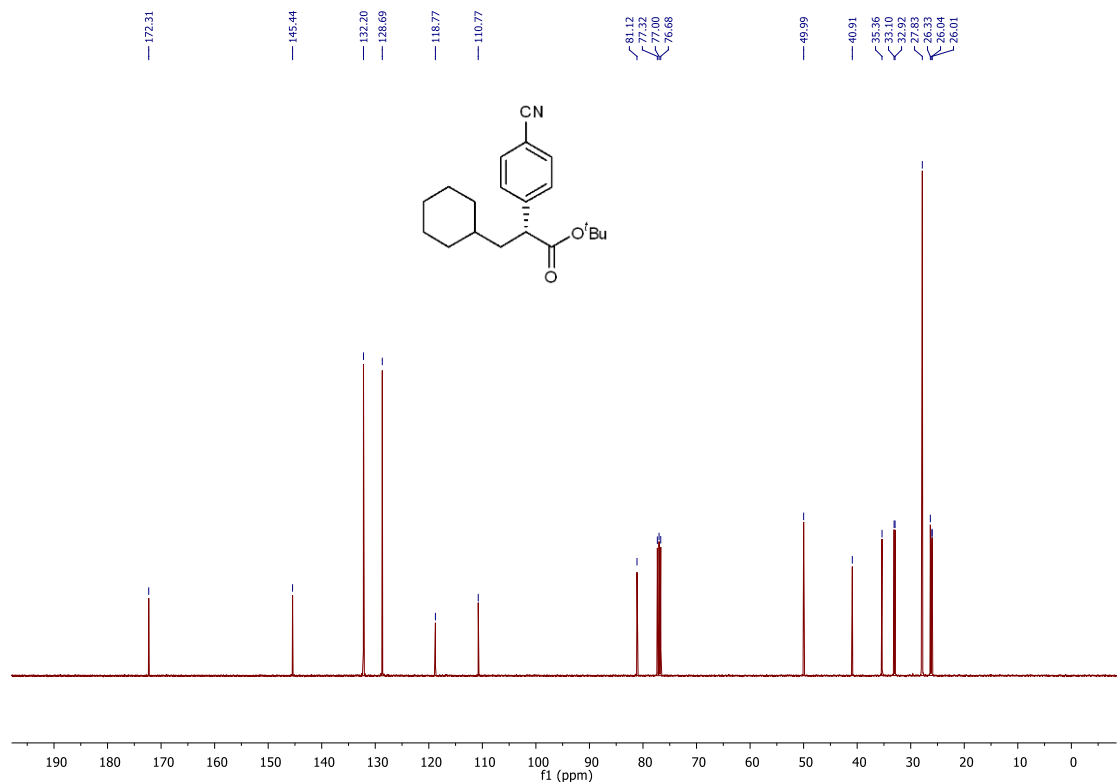

Supplementary Figure 12. <sup>13</sup>C NMR of compound 1.



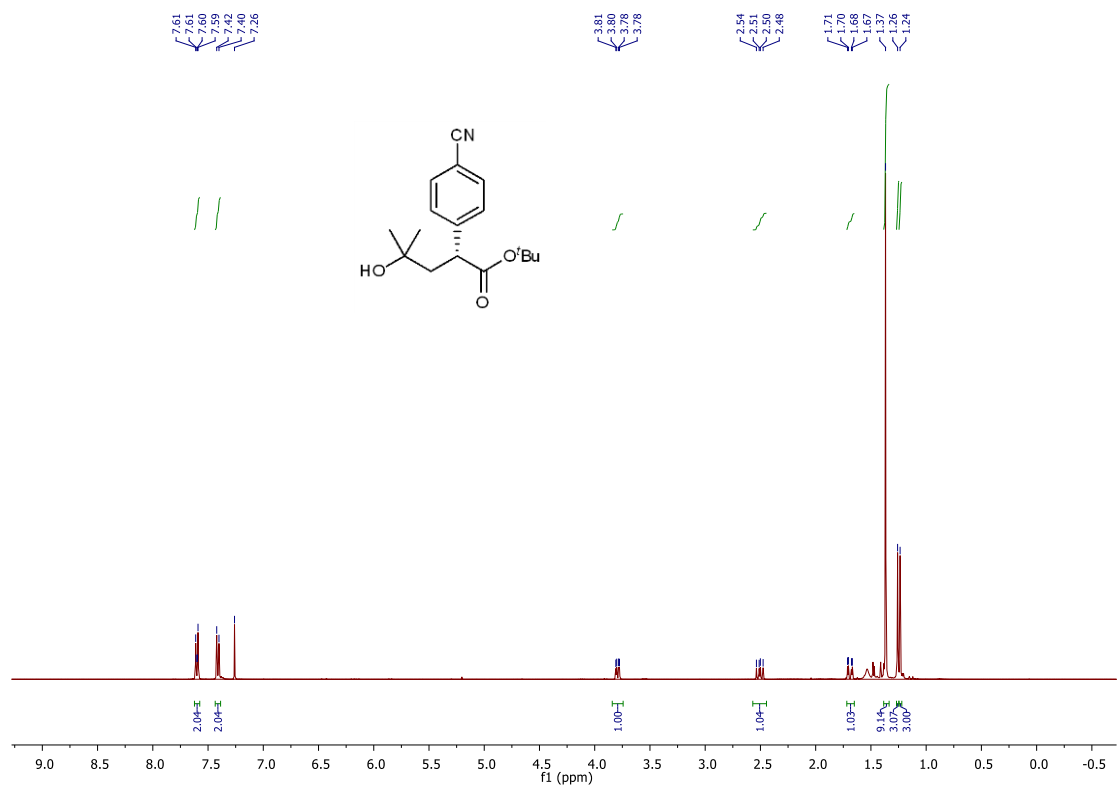

Supplementary Figure 13.  $^1\text{H}$  NMR of compound 2.

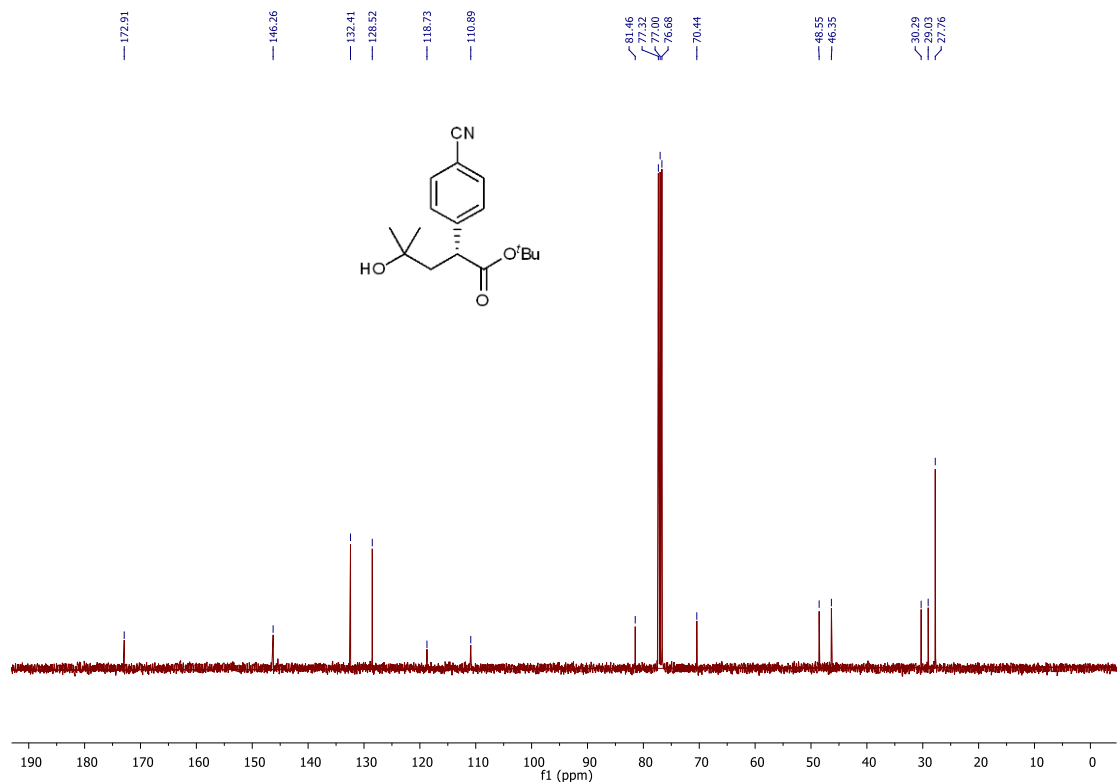

Supplementary Figure 14.  $^{13}\text{C}$  NMR of compound 2.

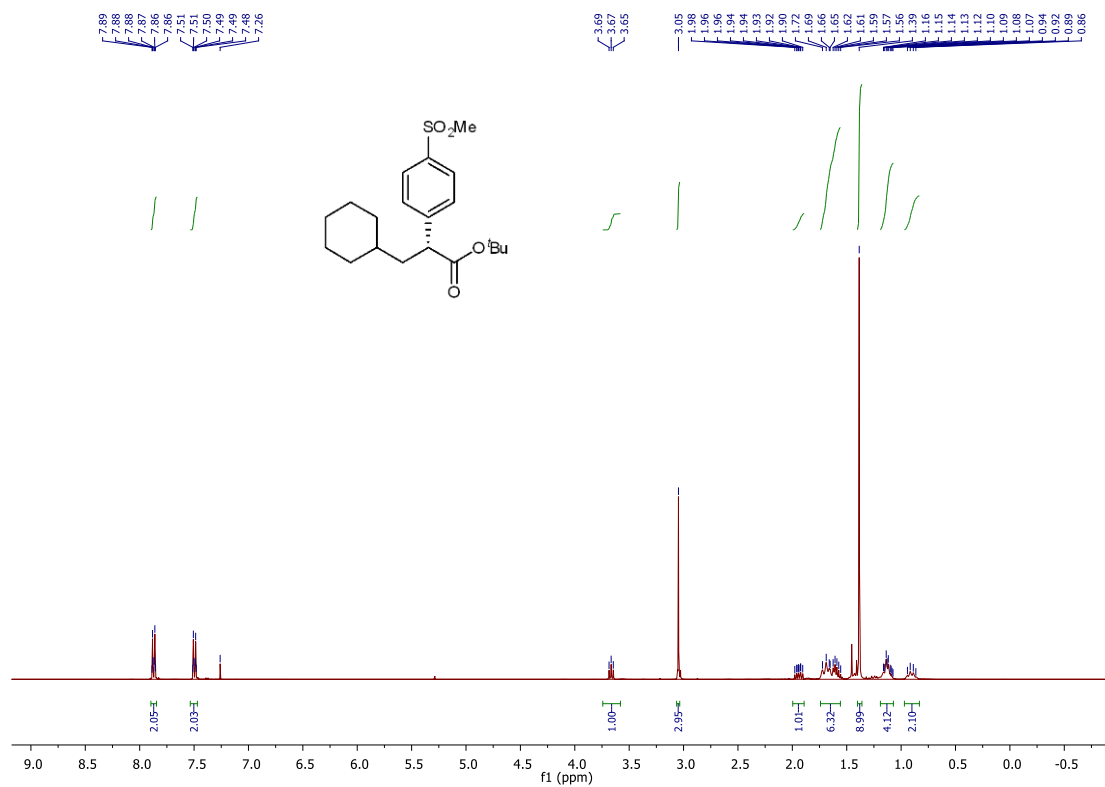

Supplementary Figure 15. <sup>1</sup>H NMR of compound 3.

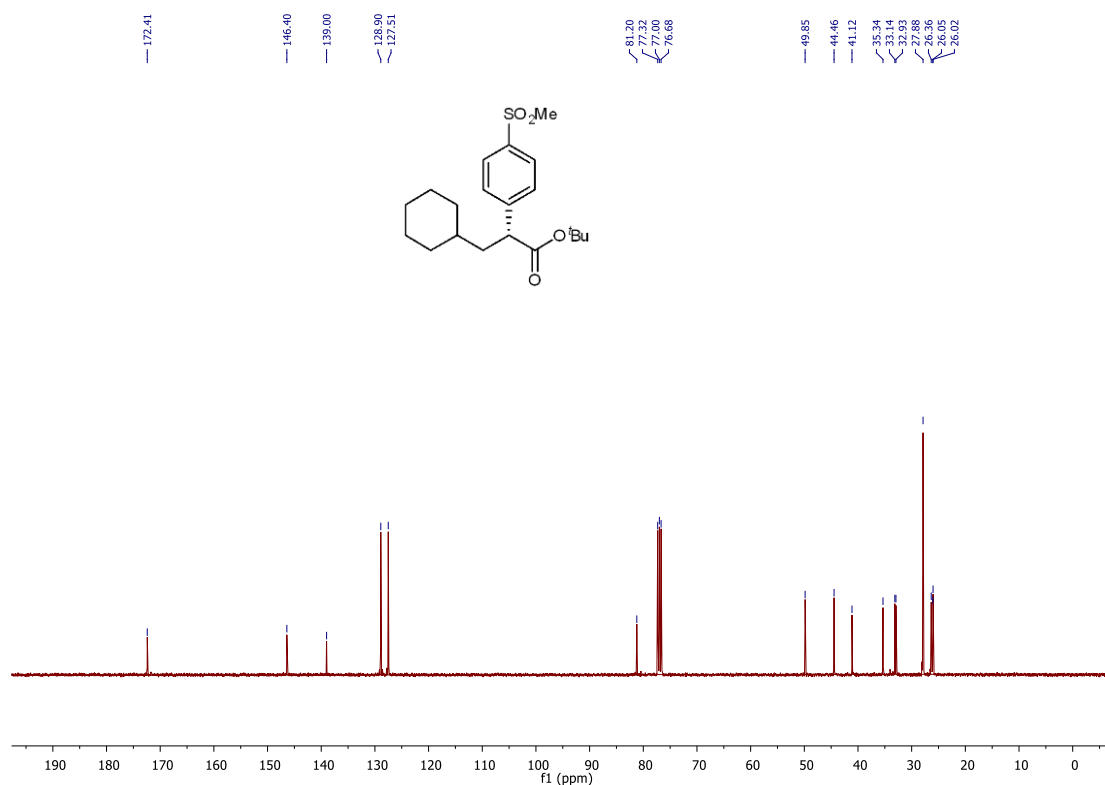

Supplementary Figure 16. <sup>13</sup>C NMR of compound 3.

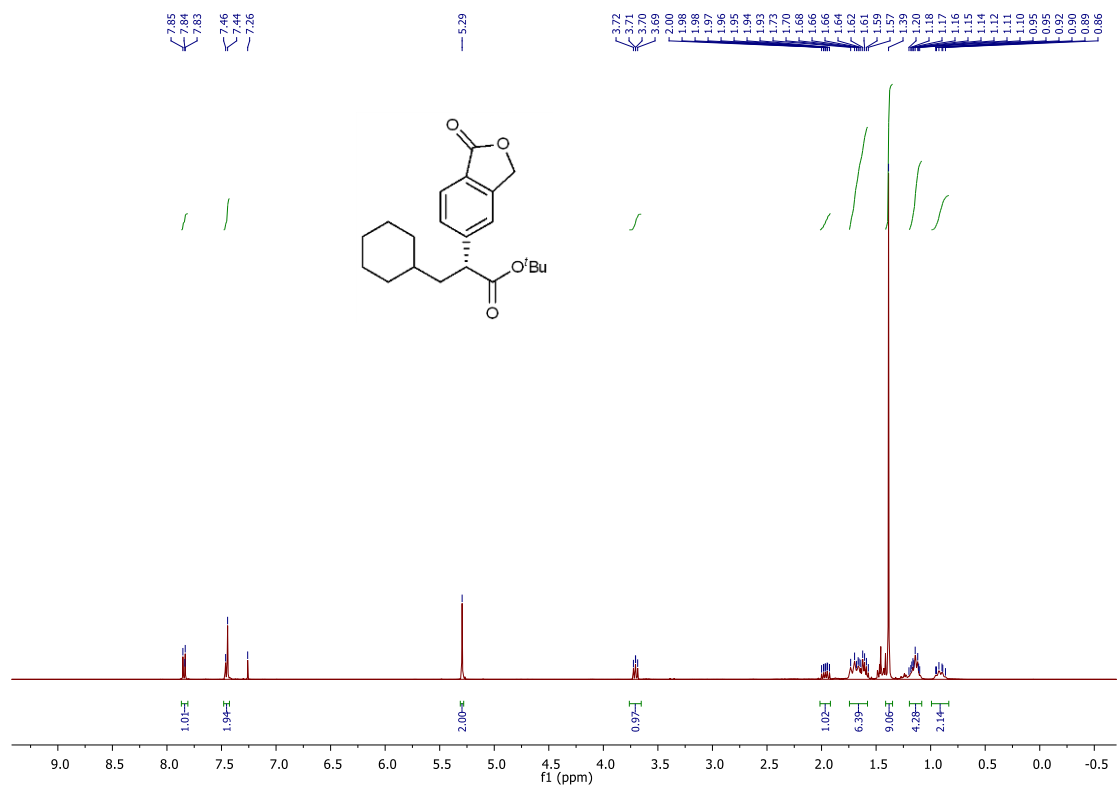

Supplementary Figure 17. <sup>1</sup>H NMR of compound 4.

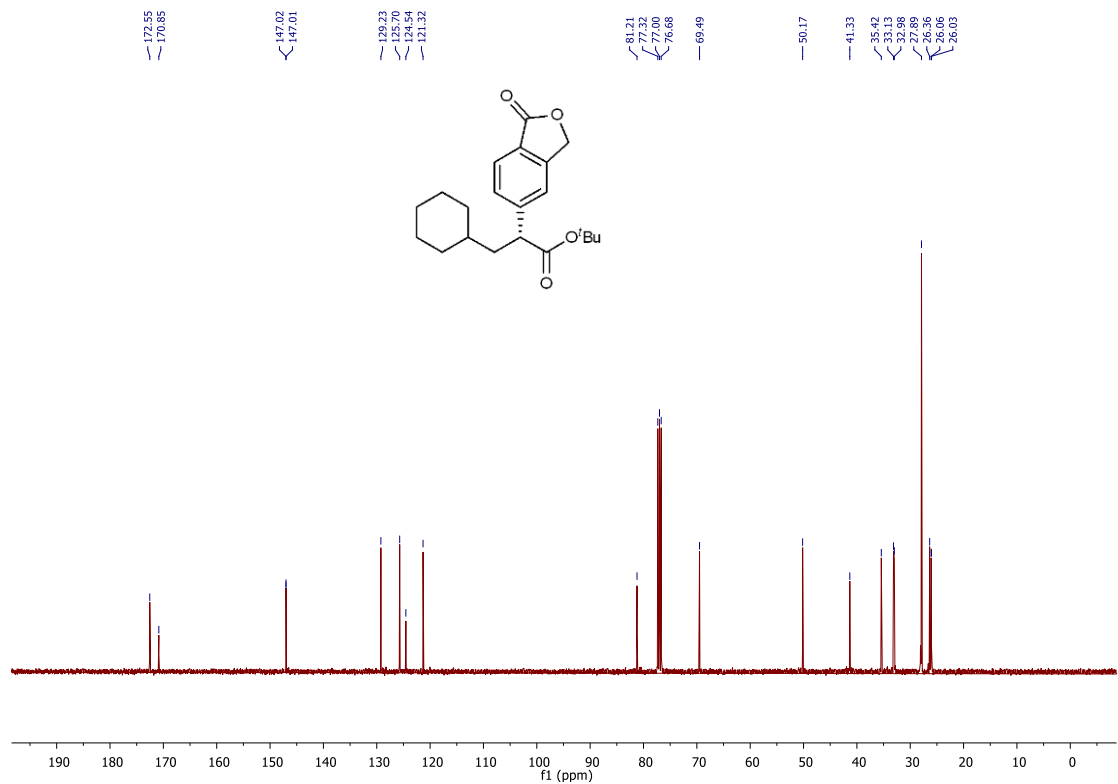

Supplementary Figure 18. <sup>13</sup>C NMR of compound 4.

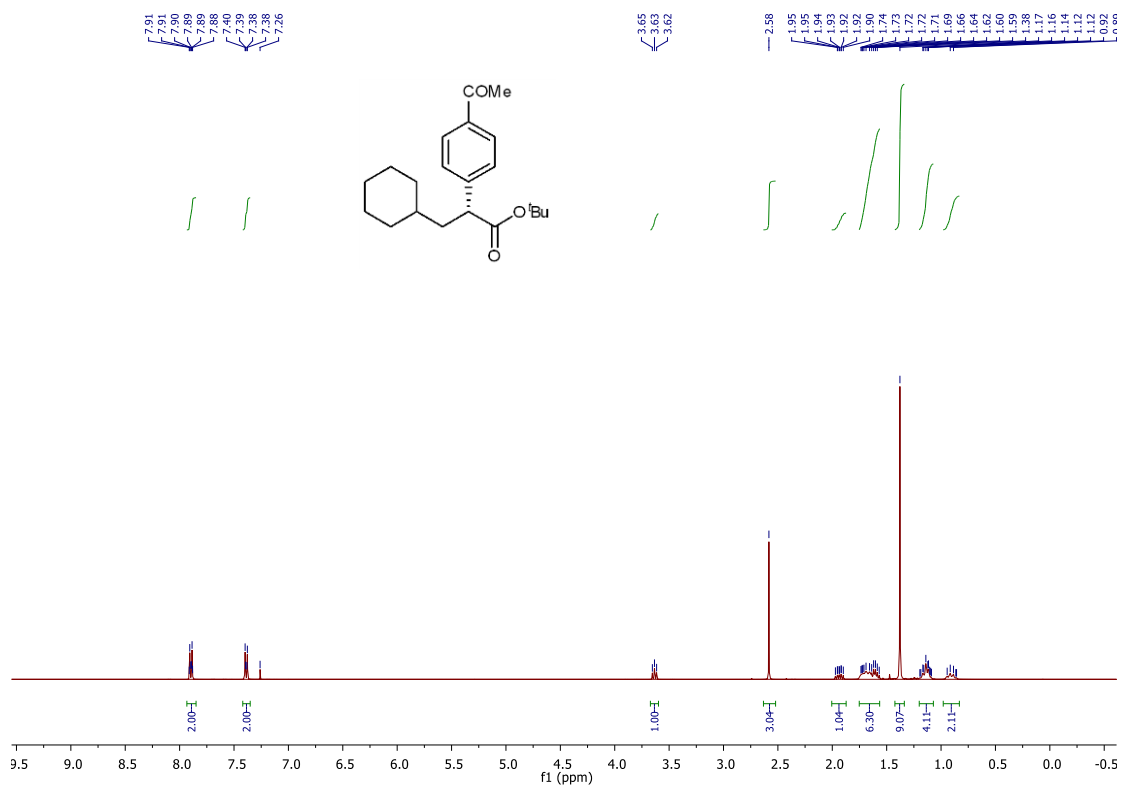

Supplementary Figure 19. <sup>1</sup>H NMR of compound 5.

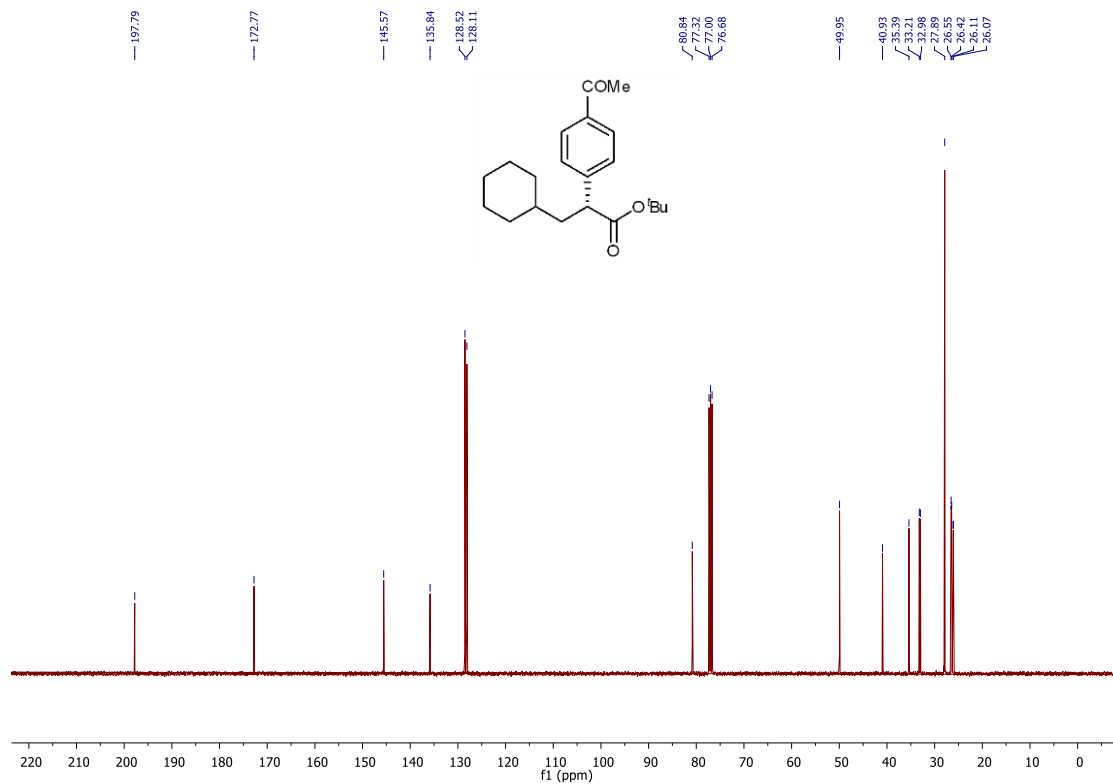

Supplementary Figure 20. <sup>13</sup>C NMR of compound 5.

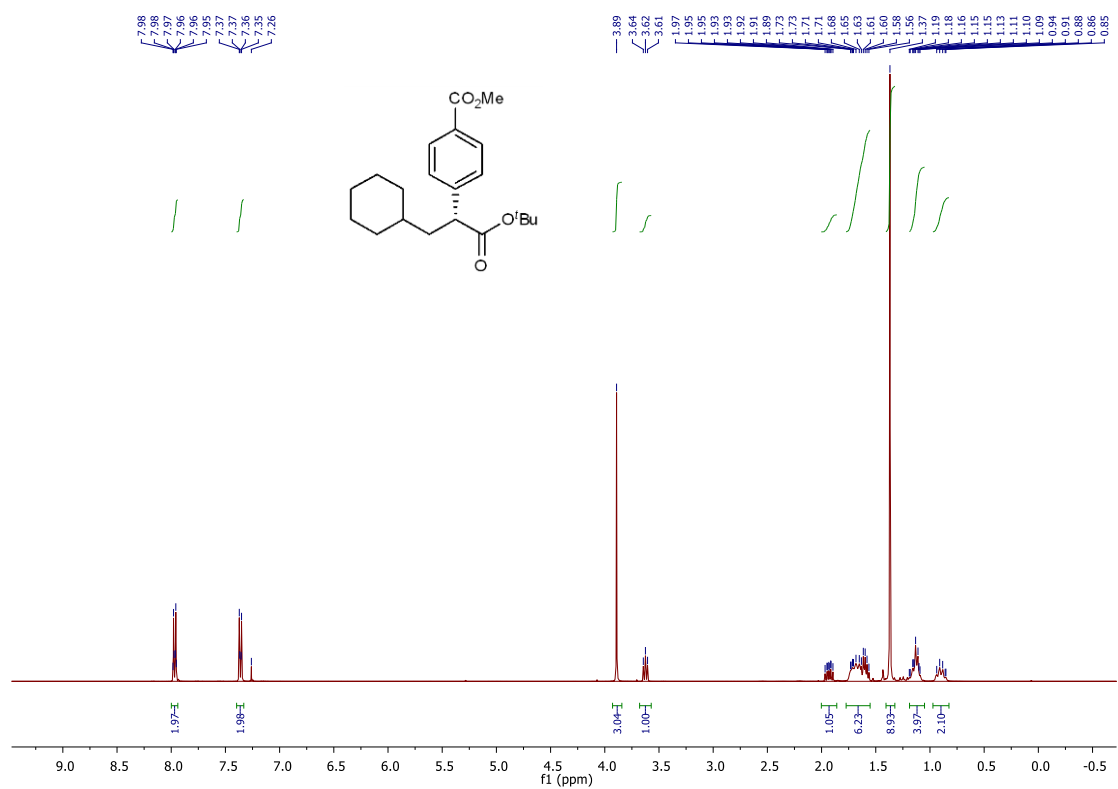

Supplementary Figure 21. <sup>1</sup>H NMR of compound 6.

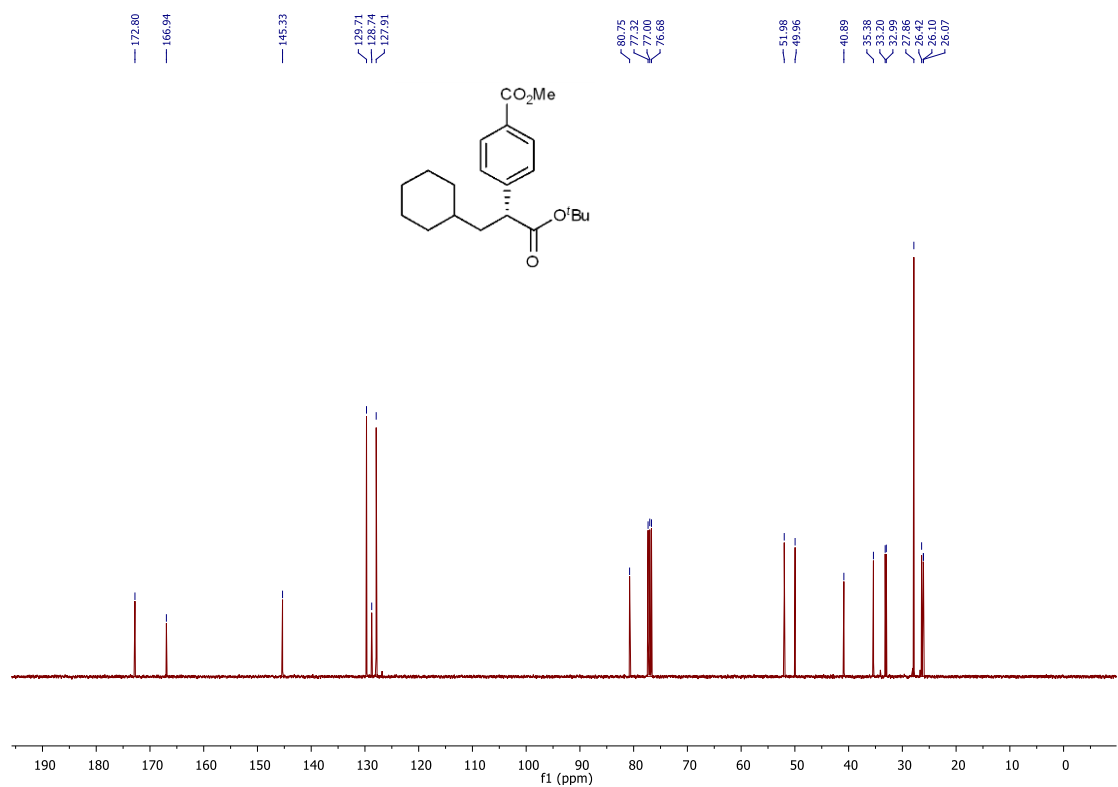

Supplementary Figure 22. <sup>13</sup>C NMR of compound 6.

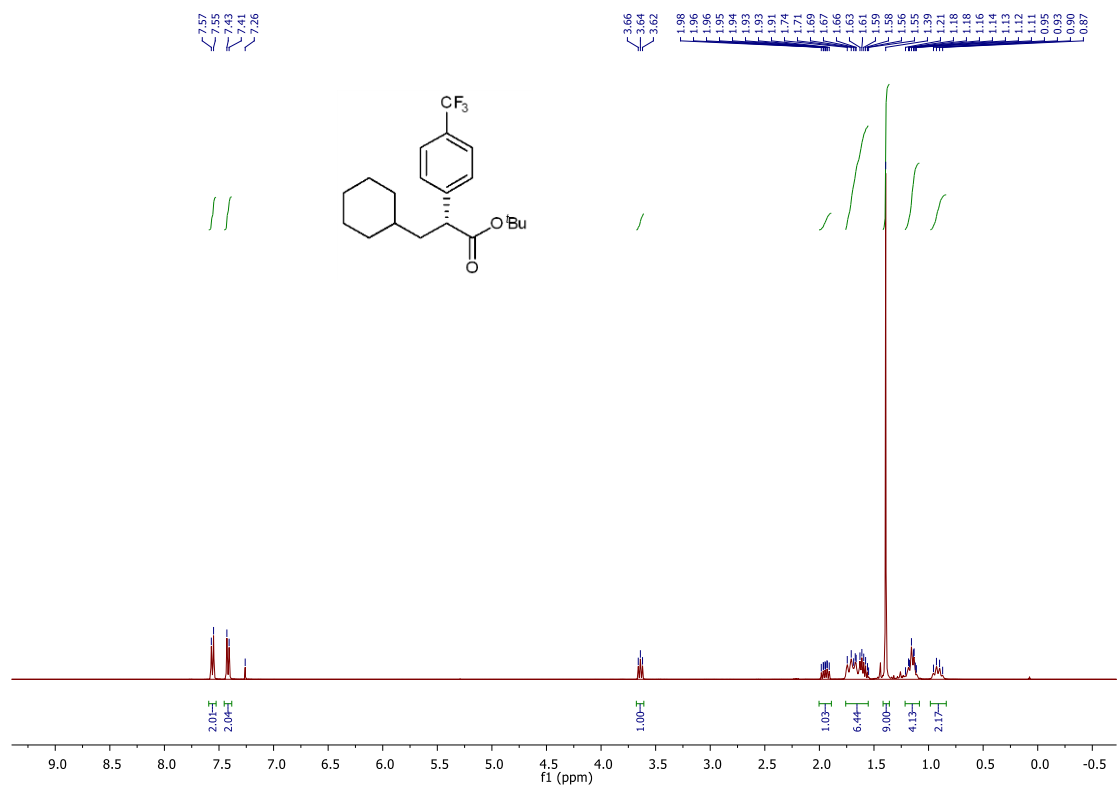

Supplementary Figure 23. <sup>1</sup>H NMR of compound 7.

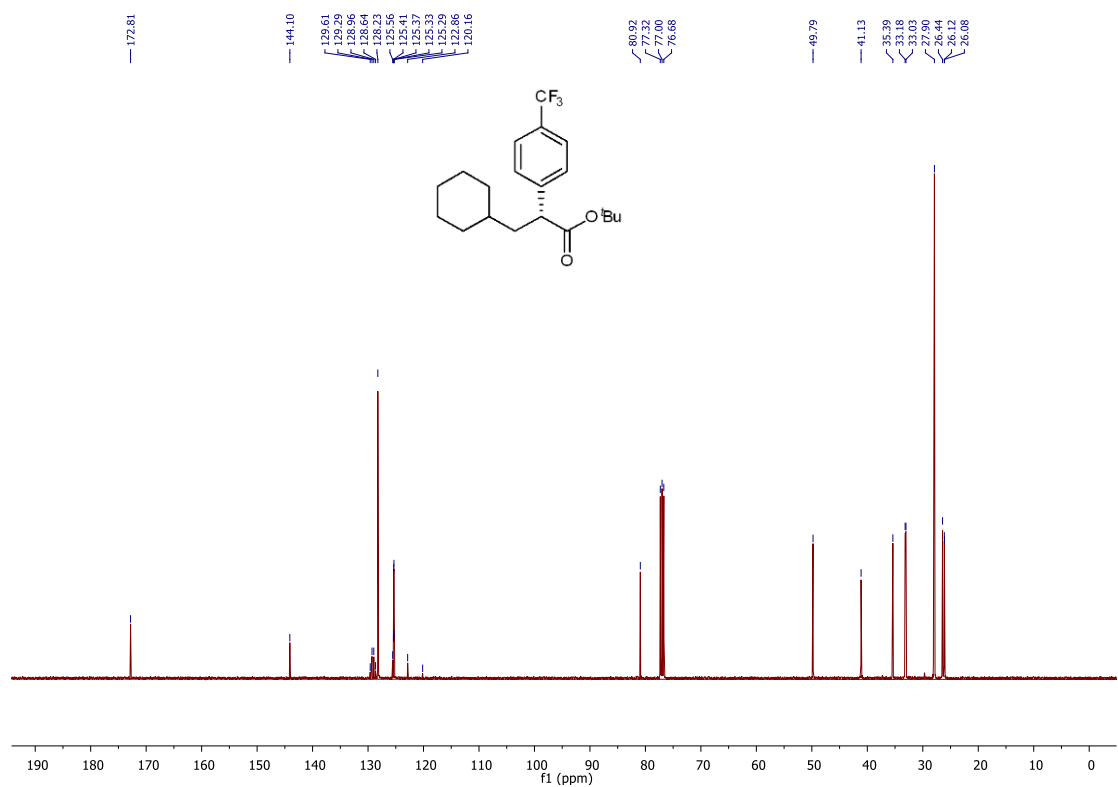

Supplementary Figure 24. <sup>13</sup>C NMR of compound 7.

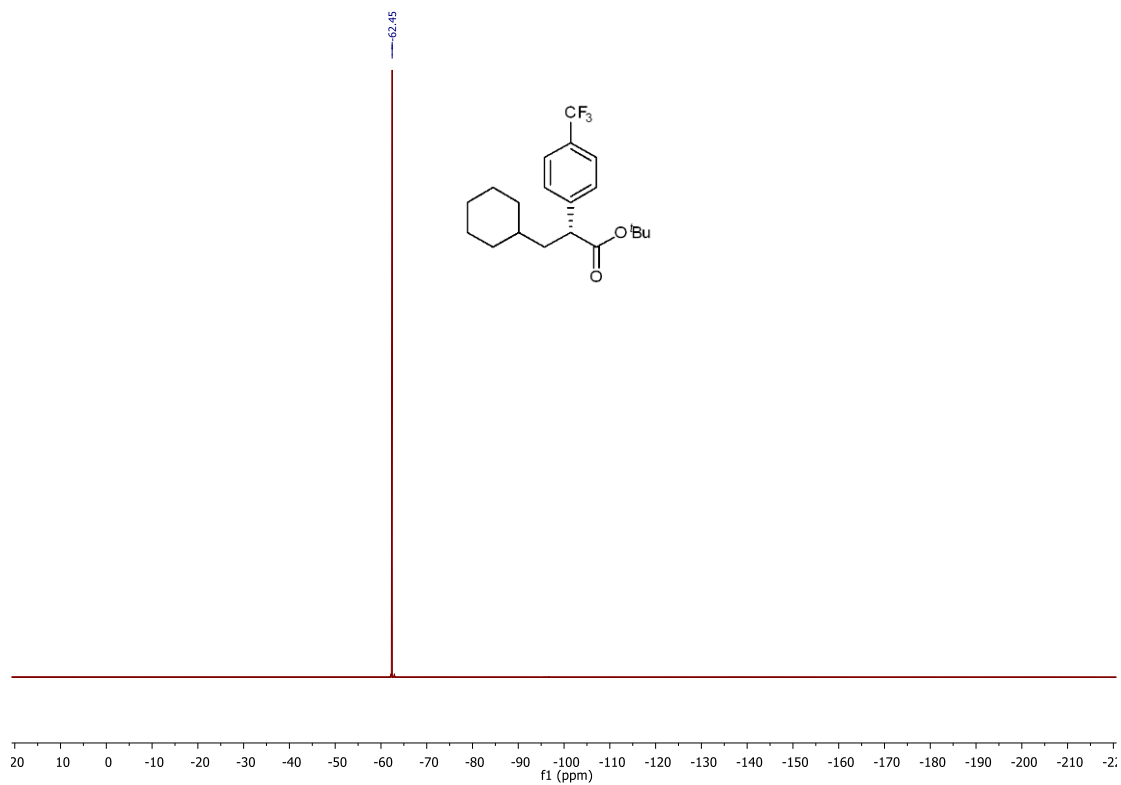

Supplementary Figure 25.  $^{19}\text{F}$  NMR of compound 7.

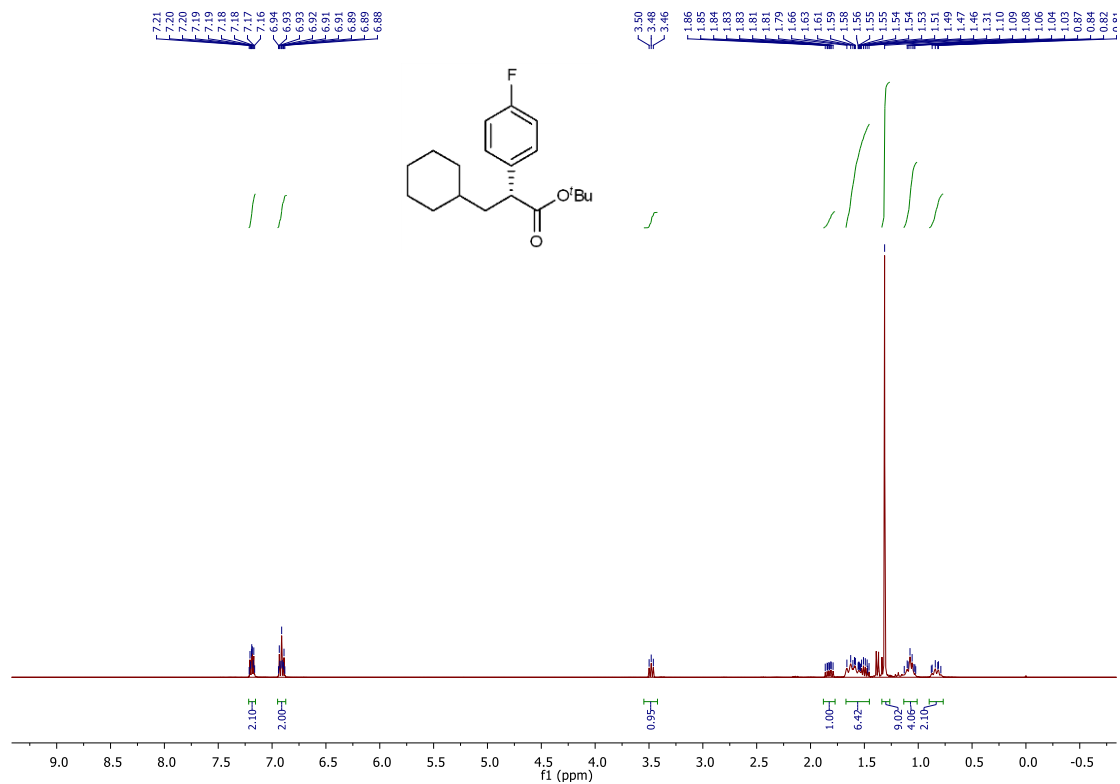

Supplementary Figure 26.  $^1\text{H}$  NMR of compound 8.

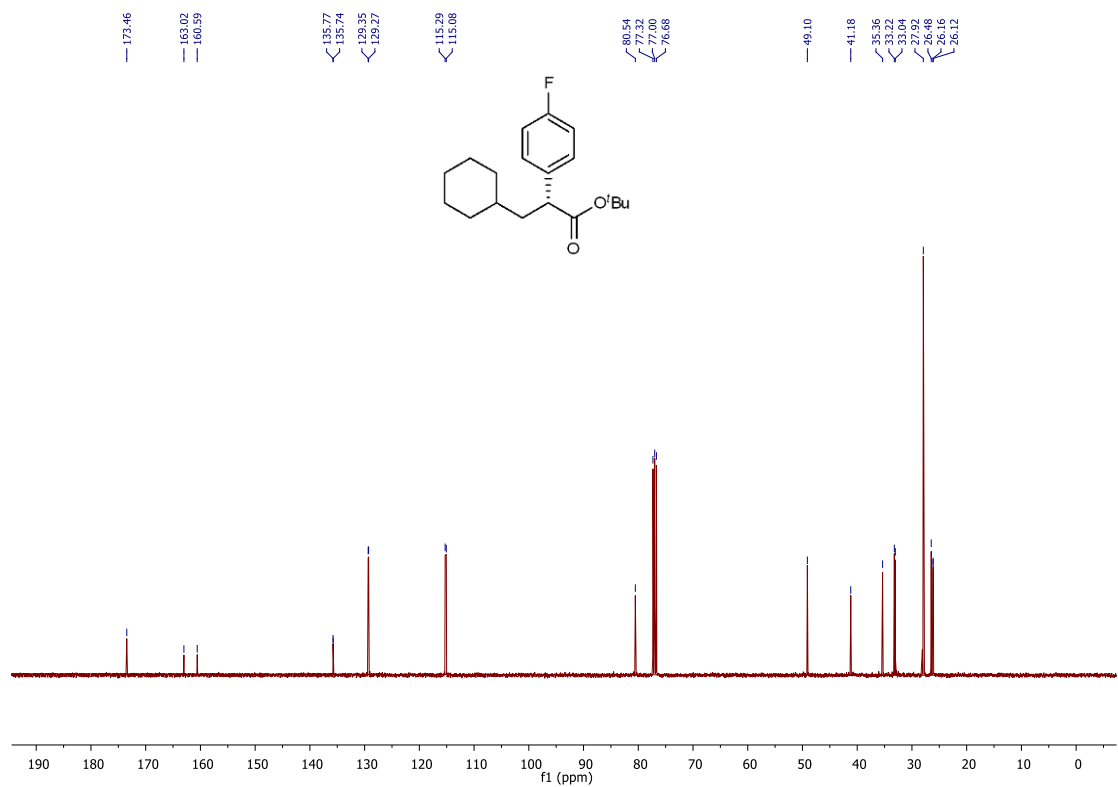

Supplementary Figure 27. <sup>13</sup>C NMR of compound 8.

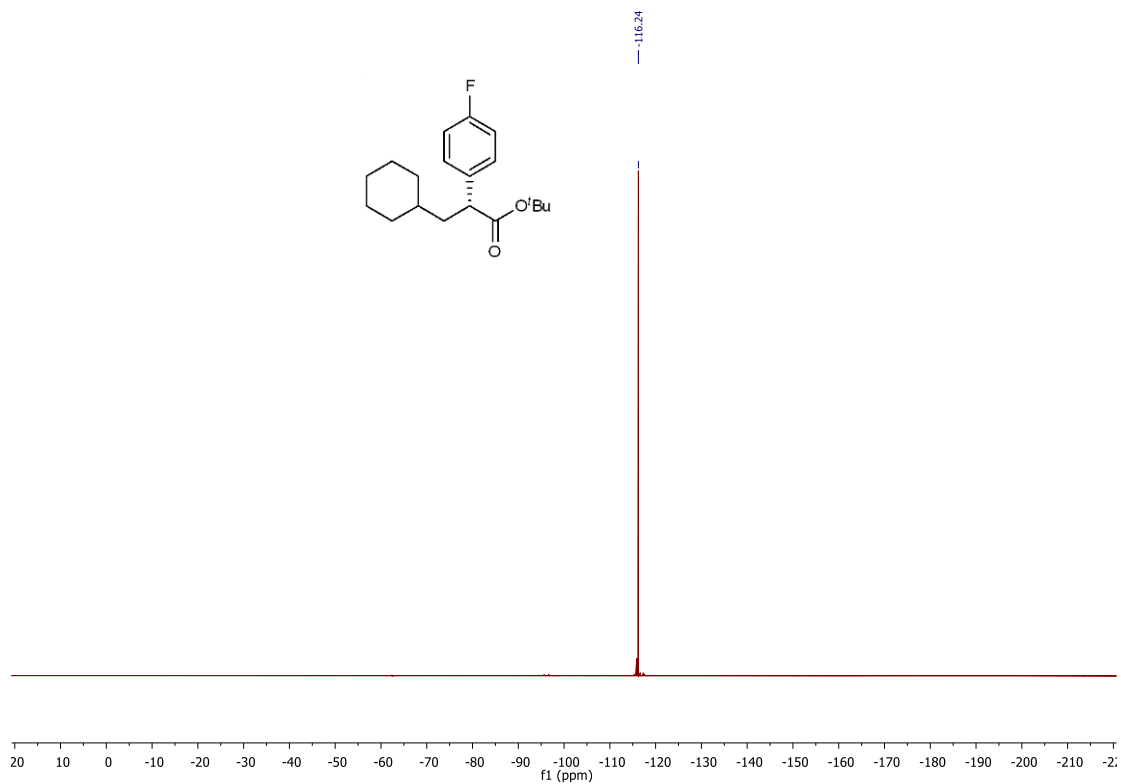

Supplementary Figure 28. <sup>19</sup>F NMR of compound 8.



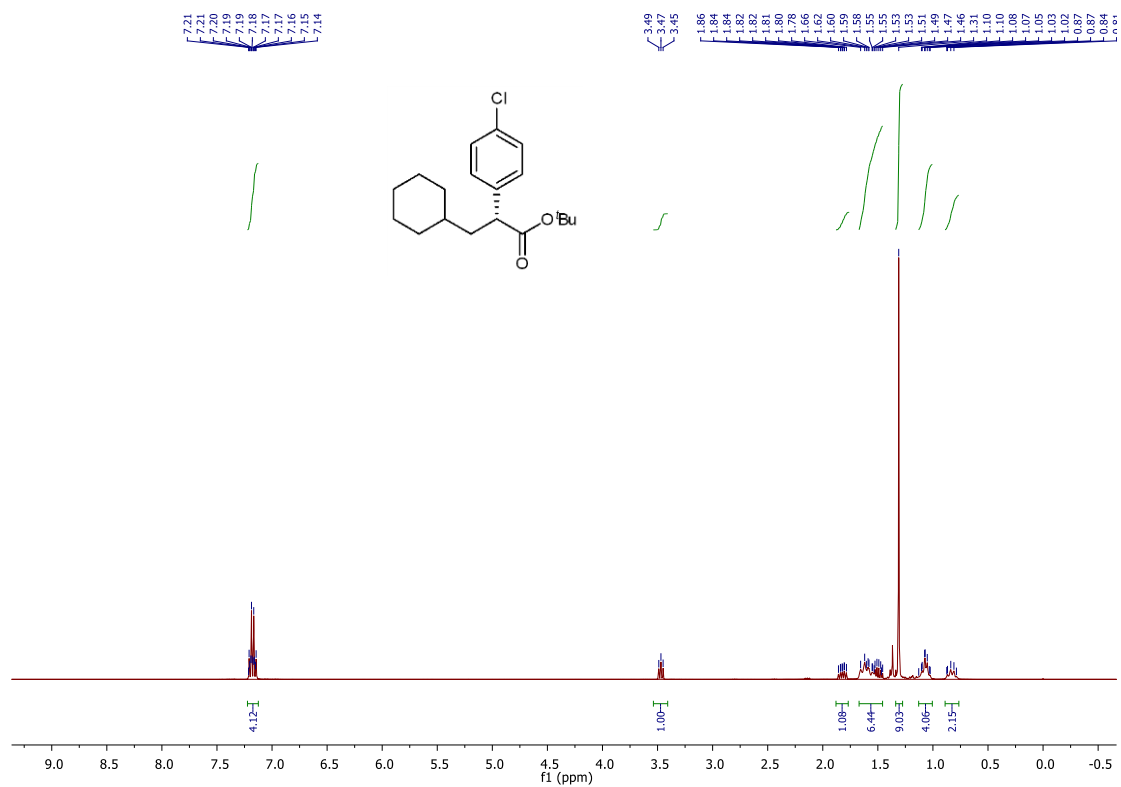

Supplementary Figure 29. <sup>1</sup>H NMR of compound 9.

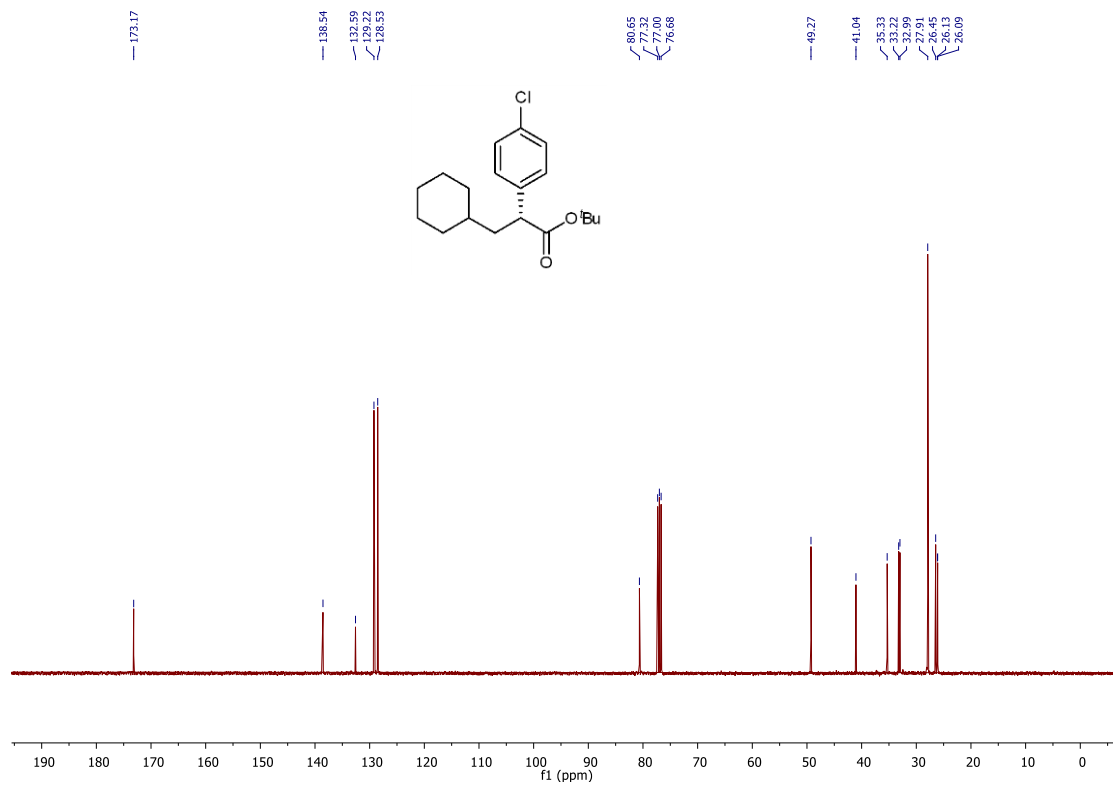

Supplementary Figure 30. <sup>13</sup>C NMR of compound 9.

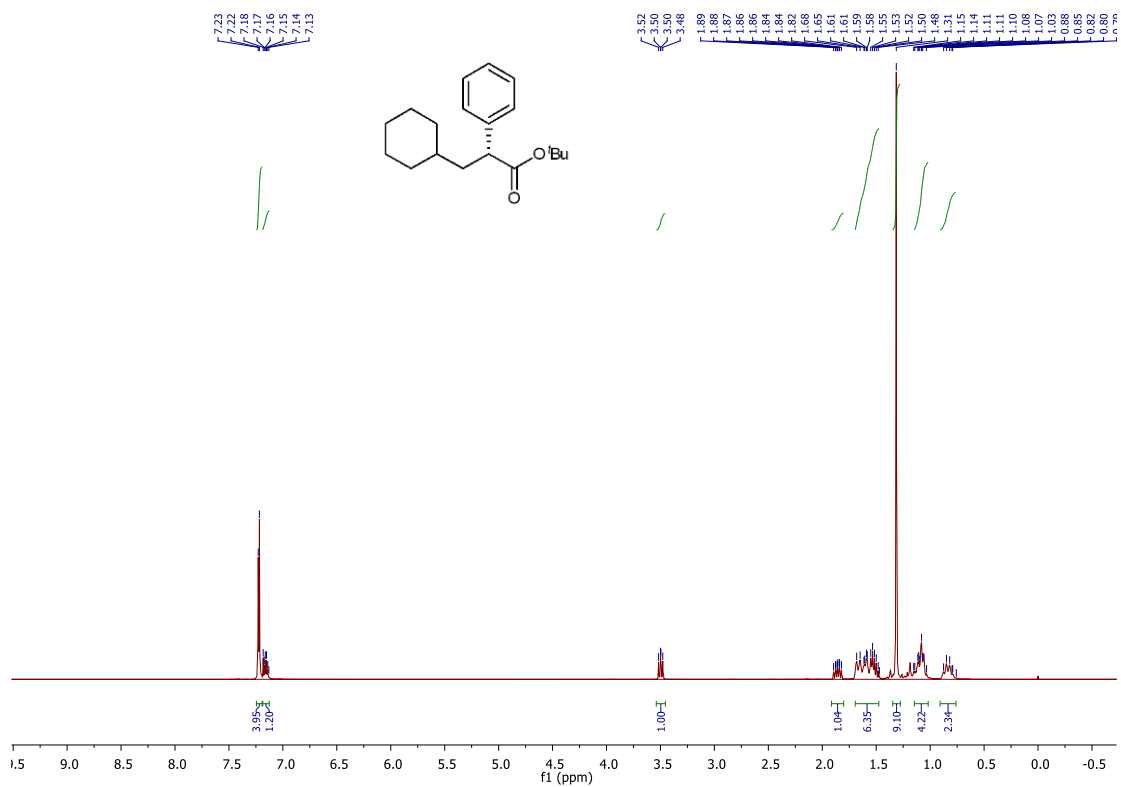

Supplementary Figure 31. <sup>1</sup>H NMR of compound 10.

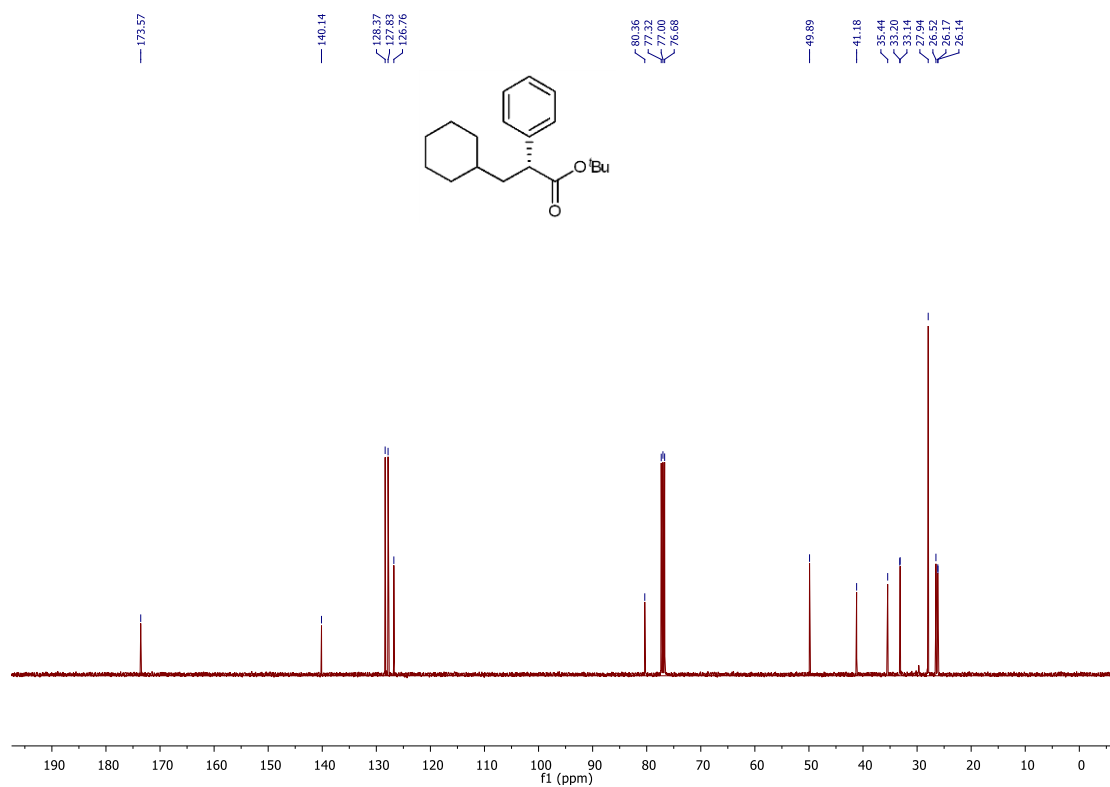

Supplementary Figure 32. <sup>13</sup>C NMR of compound 10.

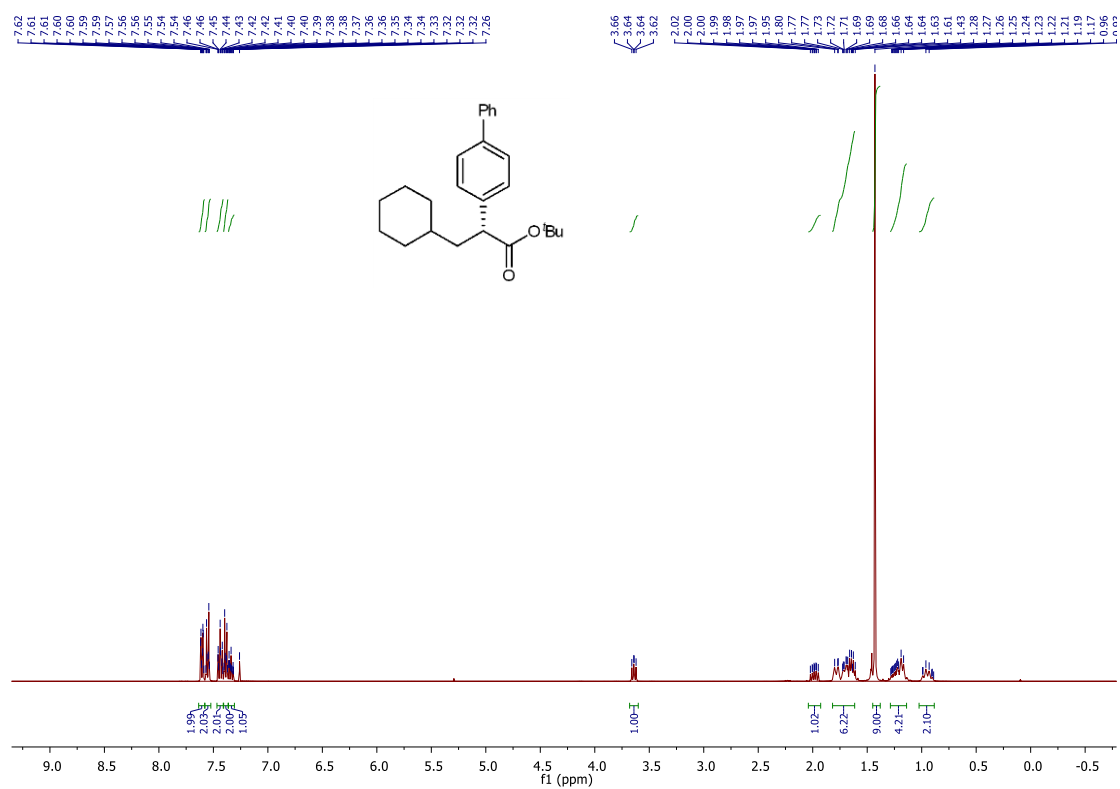

Supplementary Figure 33. <sup>1</sup>H NMR of compound 11.

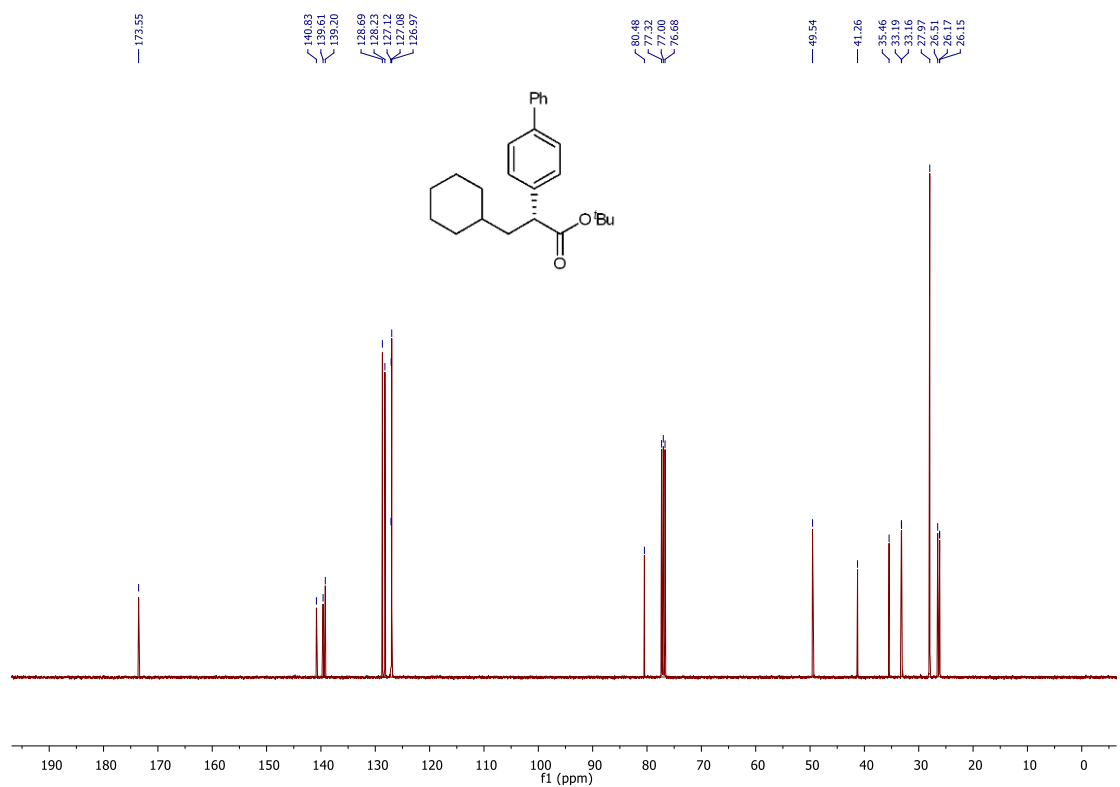

Supplementary Figure 34. <sup>13</sup>C NMR of compound 11.

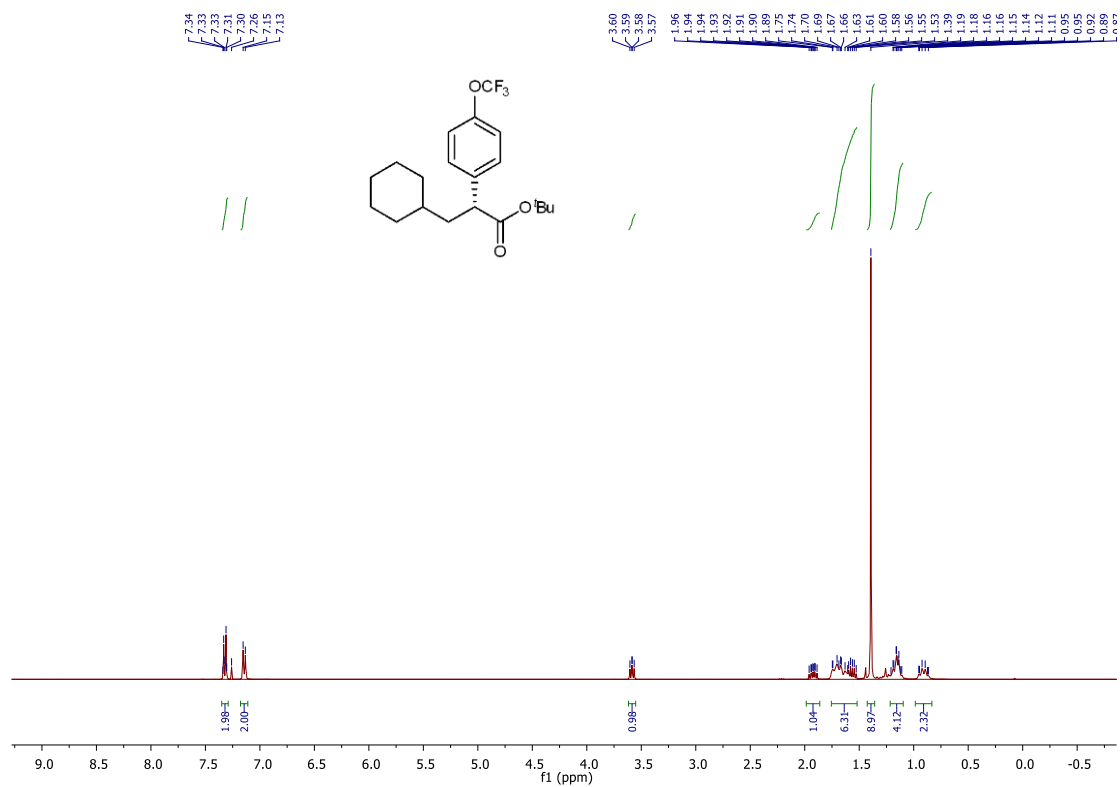

Supplementary Figure 35. <sup>1</sup>H NMR of compound 12.

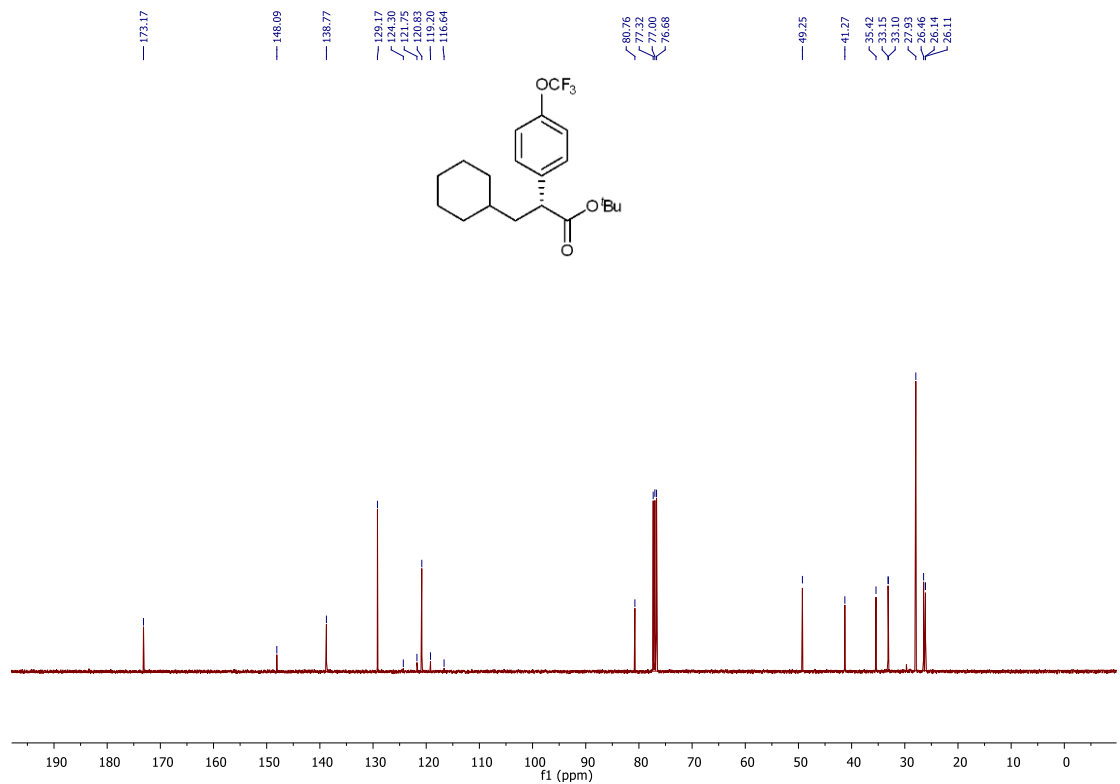

Supplementary Figure 36. <sup>13</sup>C NMR of compound 12.





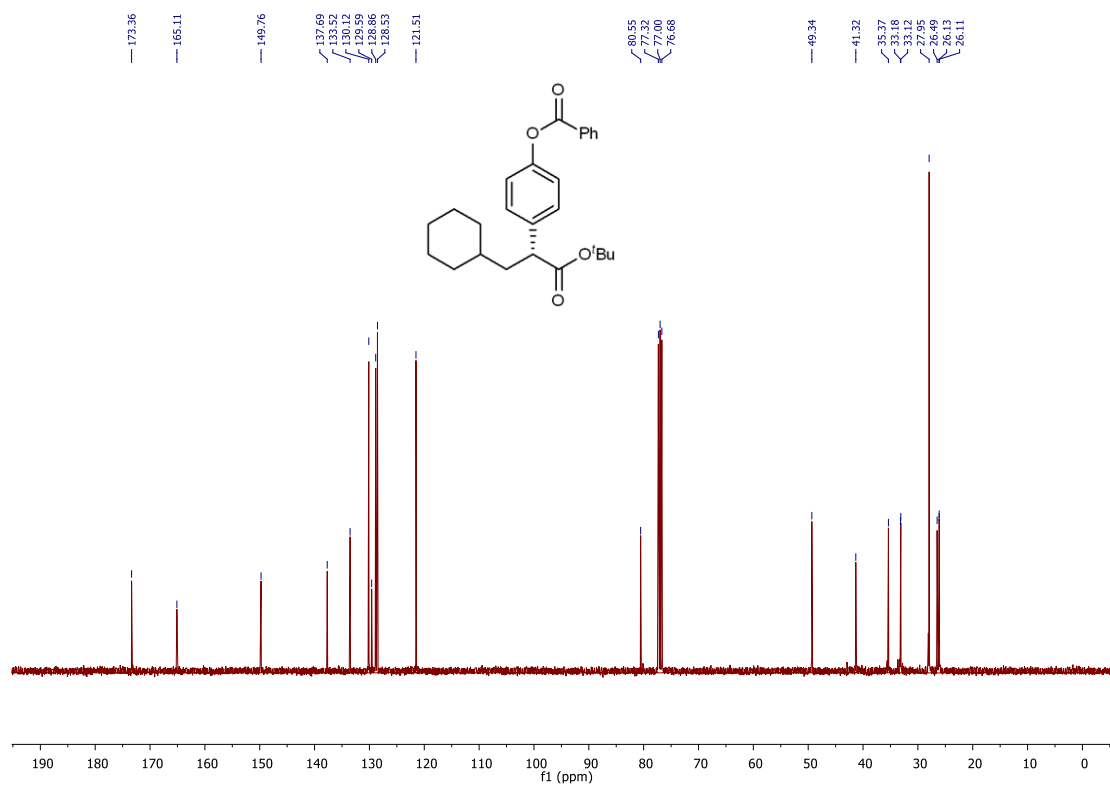

Supplementary Figure 41. <sup>13</sup>C NMR of compound 14.

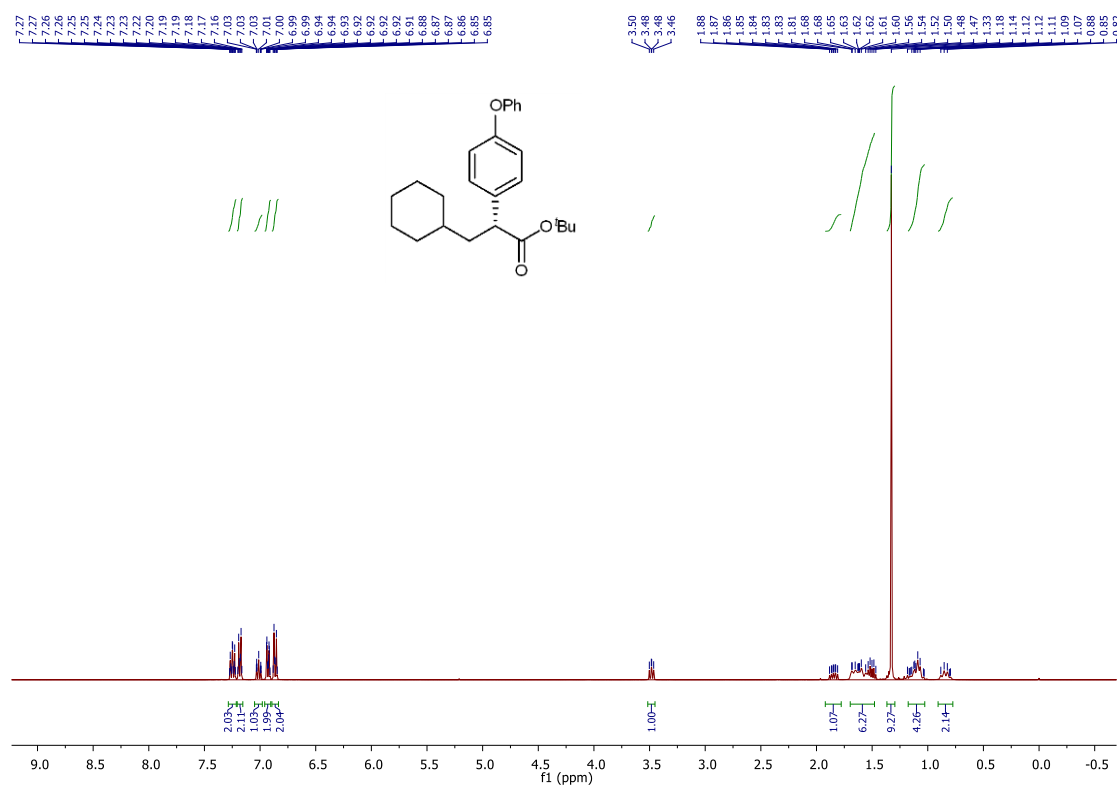

Supplementary Figure 42. <sup>1</sup>H NMR of compound 15.

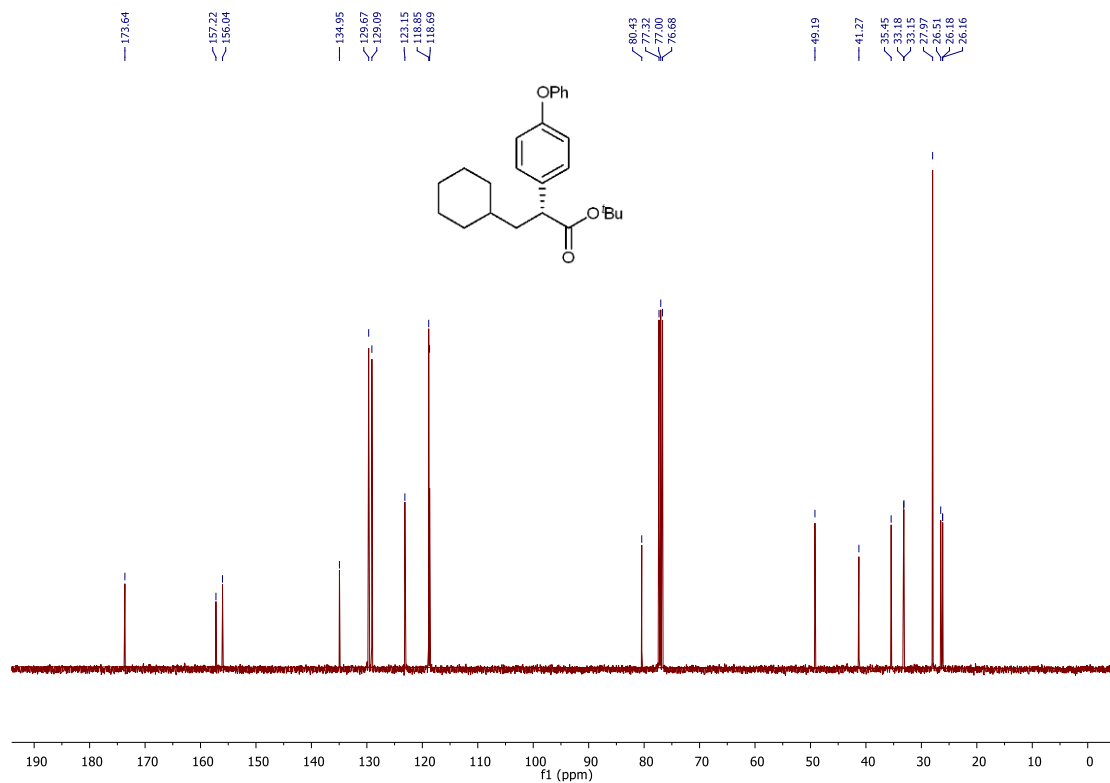

Supplementary Figure 43.  $^{13}\text{C}$  NMR of compound 15.

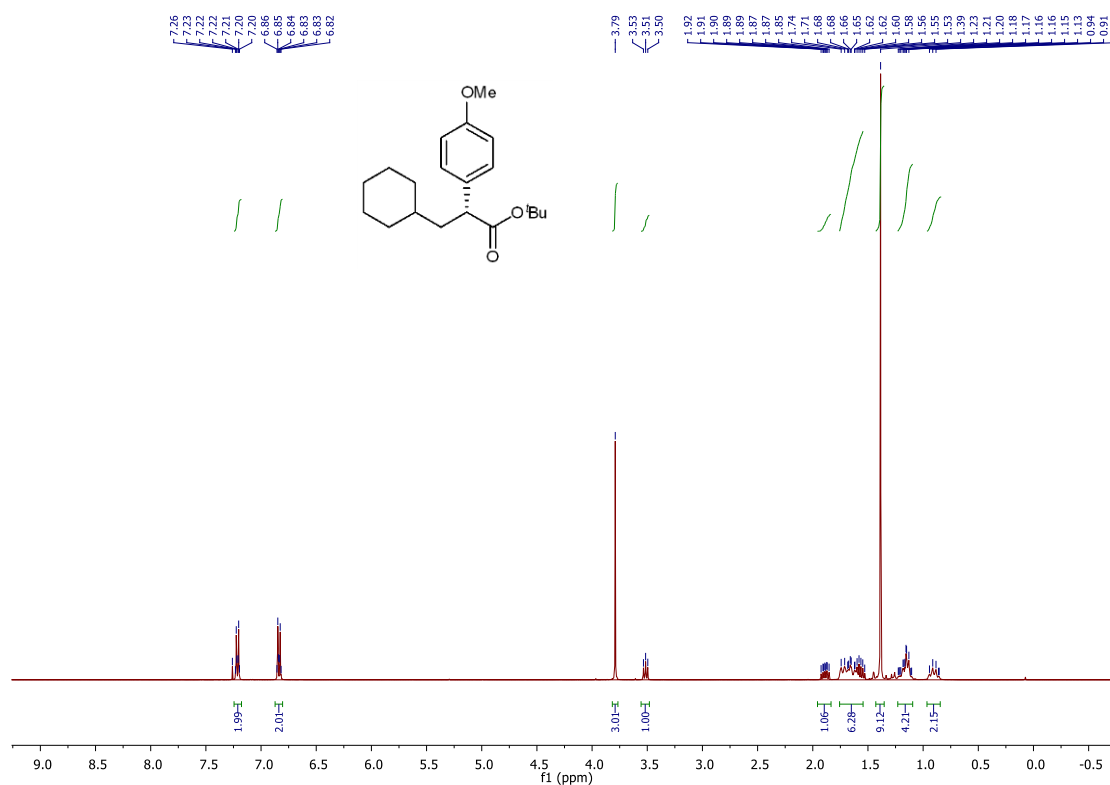

Supplementary Figure 44.  $^1\text{H}$  NMR of compound 16.



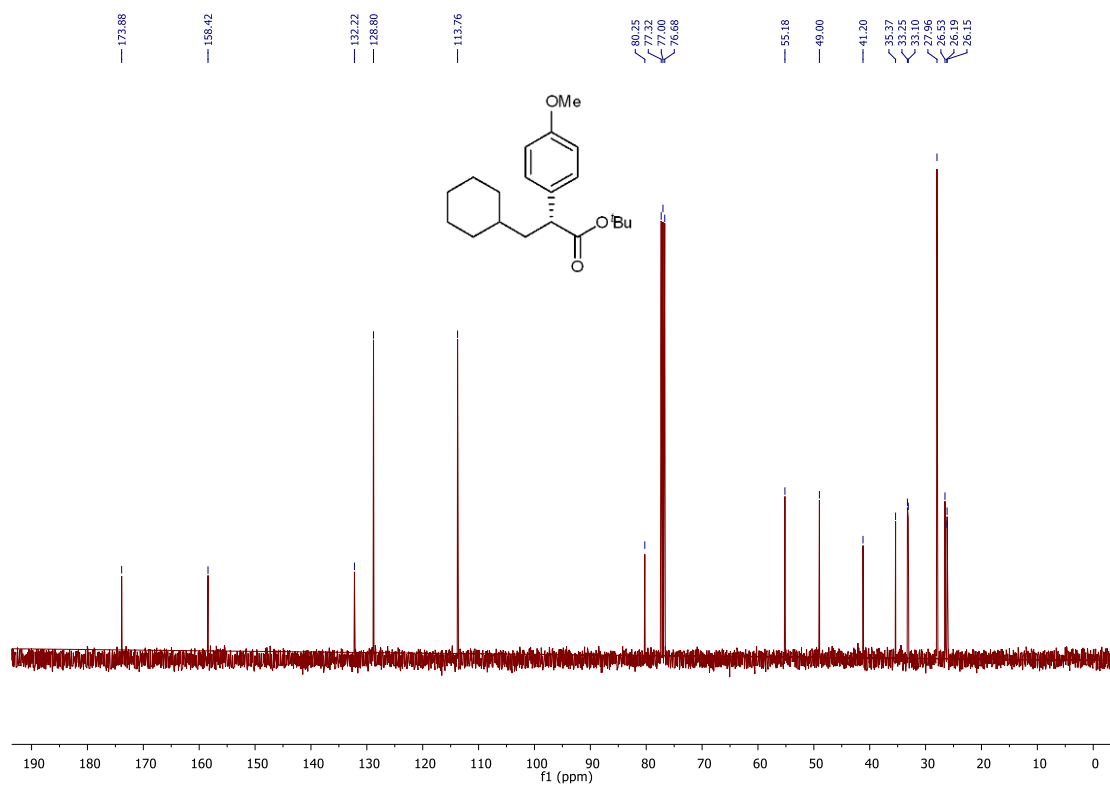

Supplementary Figure 45.  $^{13}\text{C}$  NMR of compound 16.

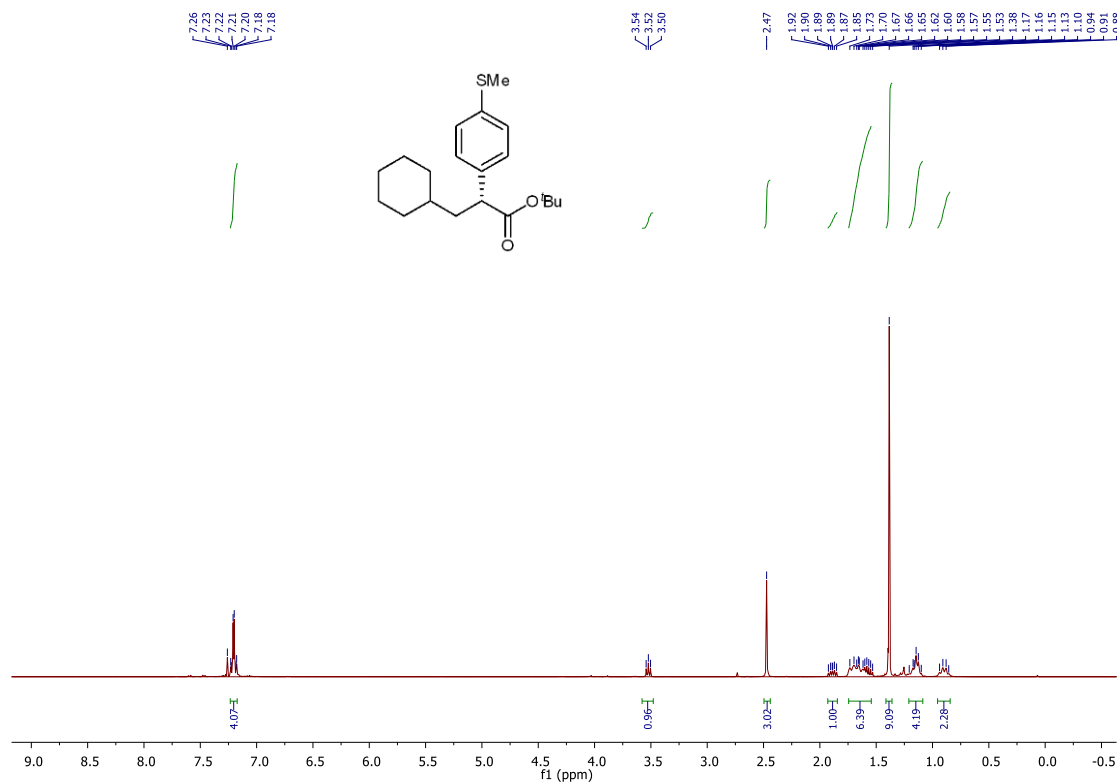

Supplementary Figure 46.  $^1\text{H}$  NMR of compound 17.



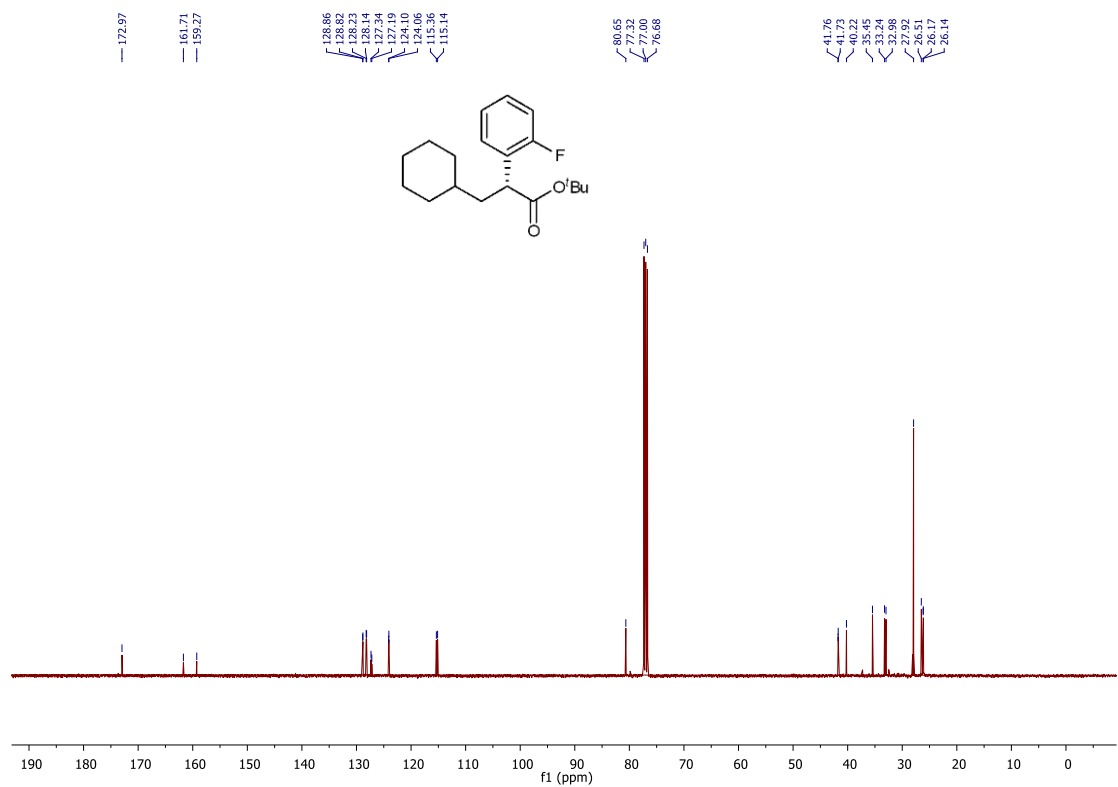

Supplementary Figure 49. <sup>13</sup>C NMR of compound 18.

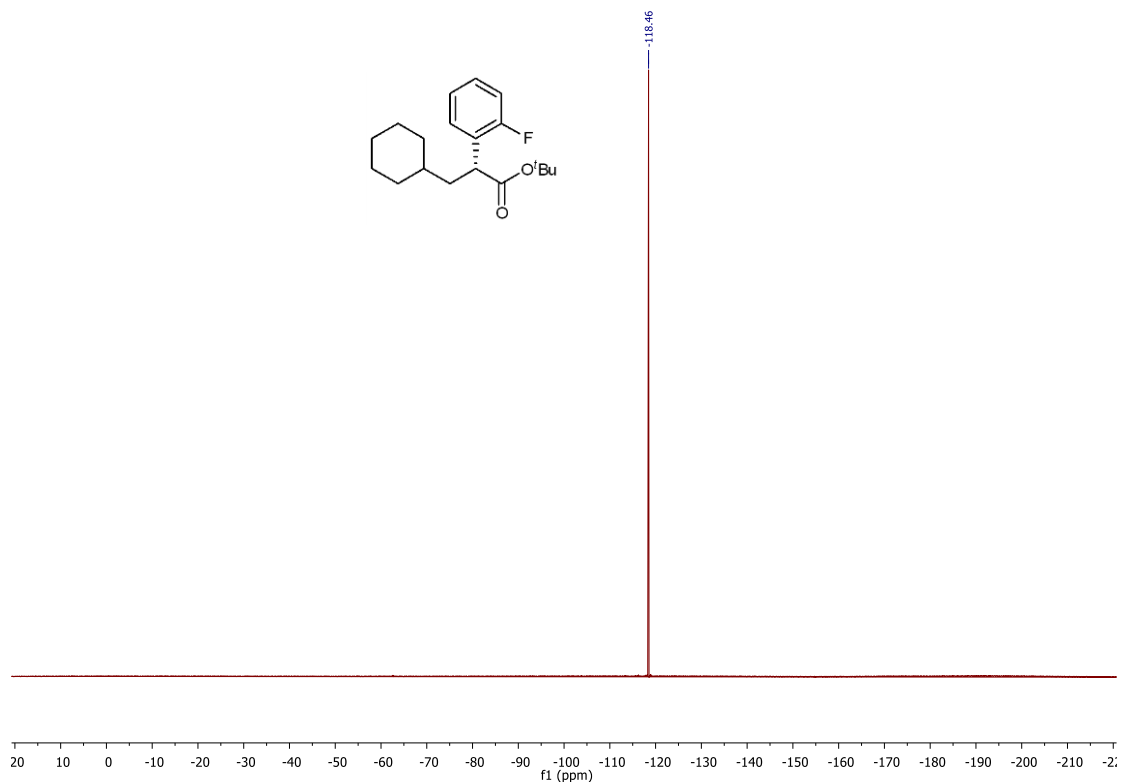

Supplementary Figure 50. <sup>19</sup>F NMR of compound 18.

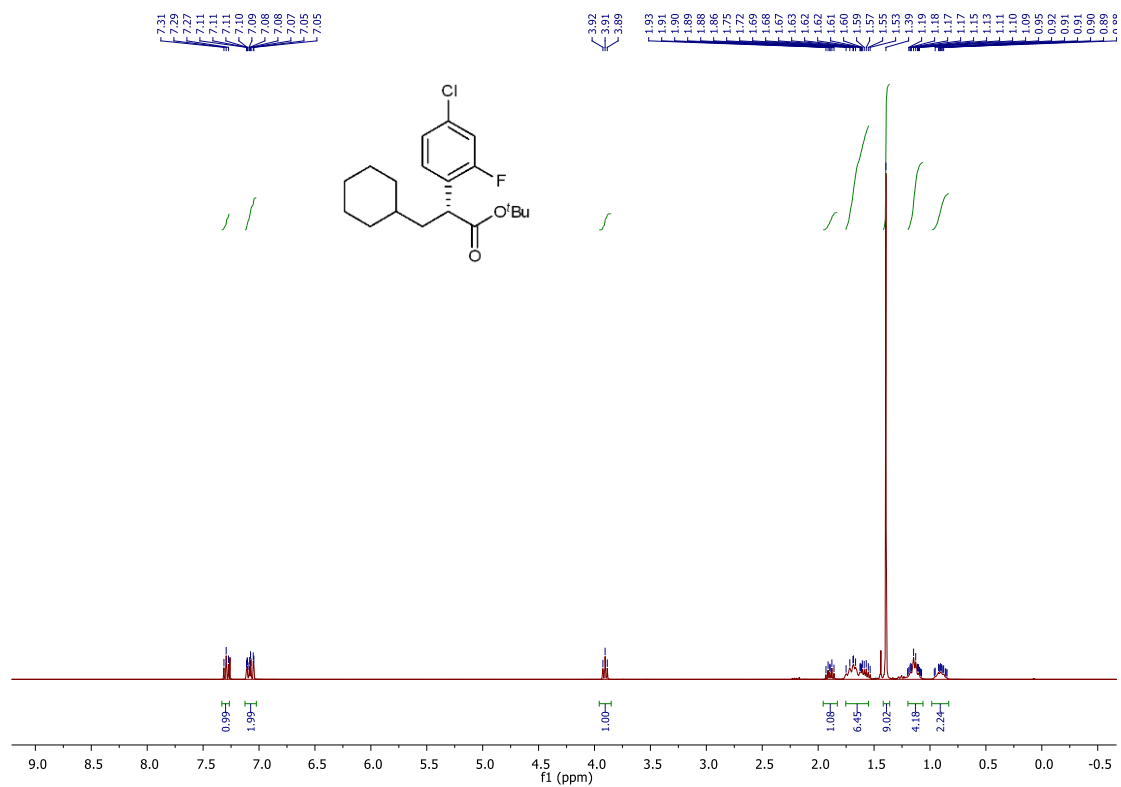

Supplementary Figure 51. <sup>1</sup>H NMR of compound 19.

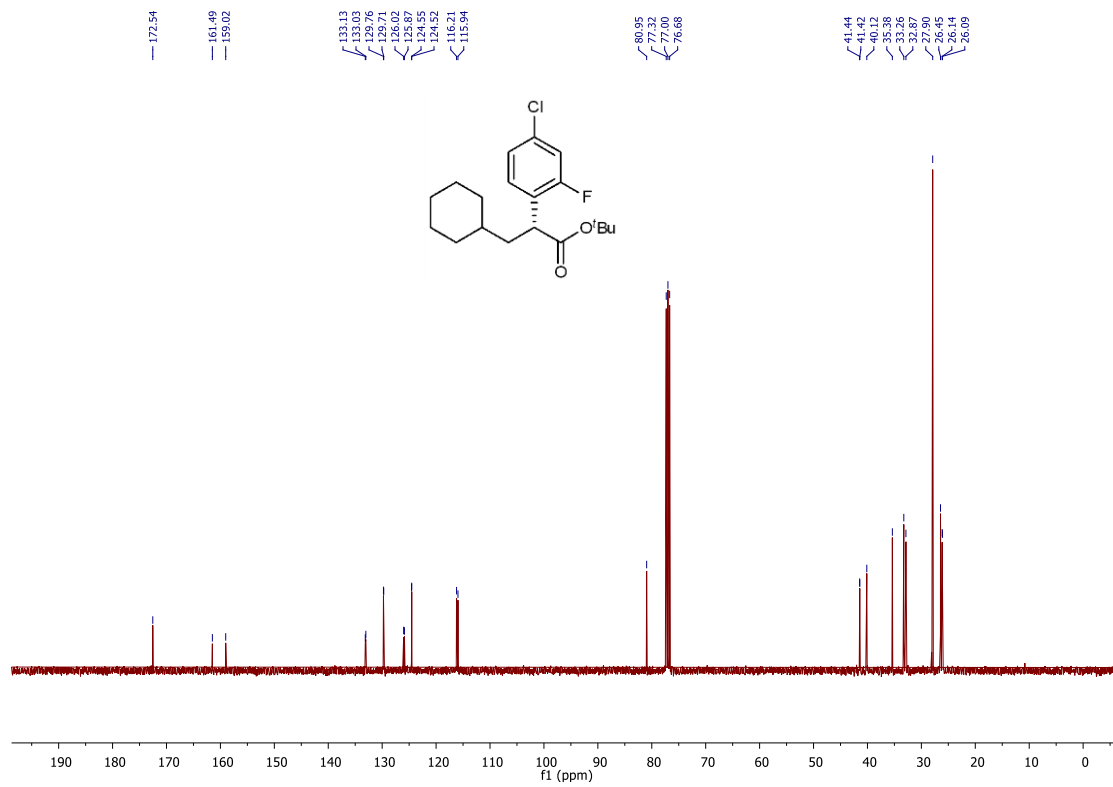

Supplementary Figure 52. <sup>13</sup>C NMR of compound 19.

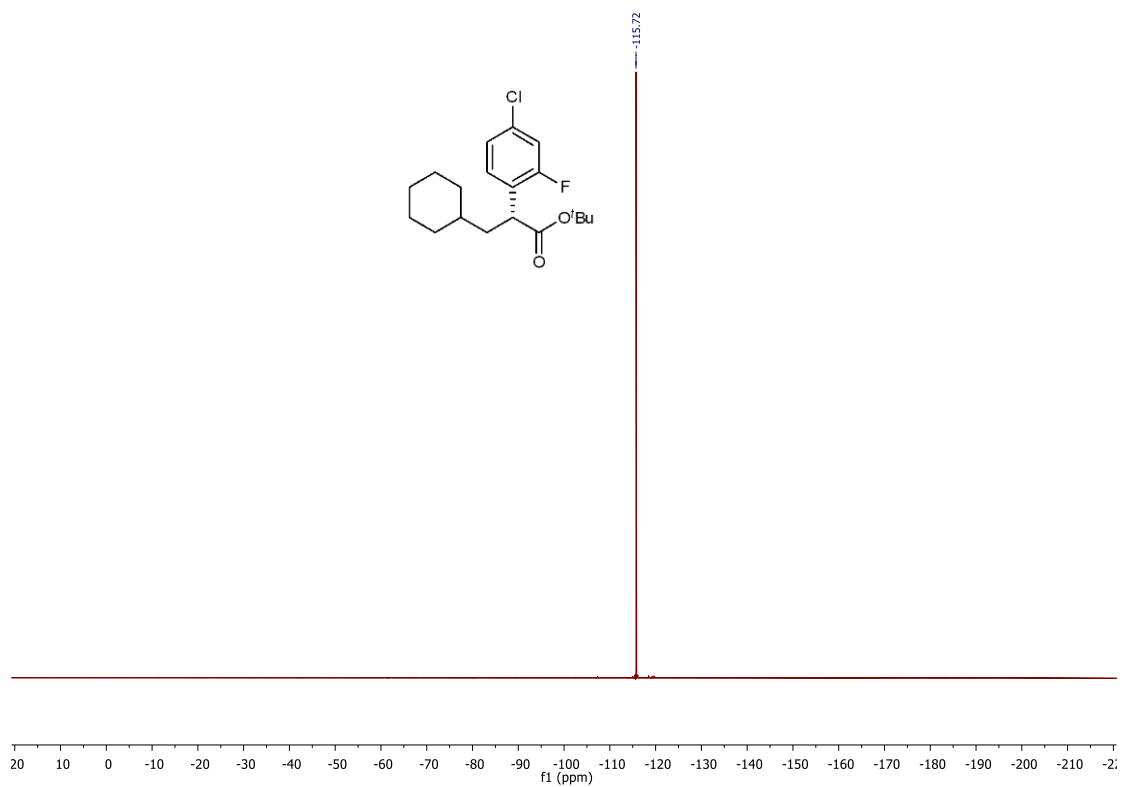

Supplementary Figure 53. <sup>19</sup>F NMR of compound 19.

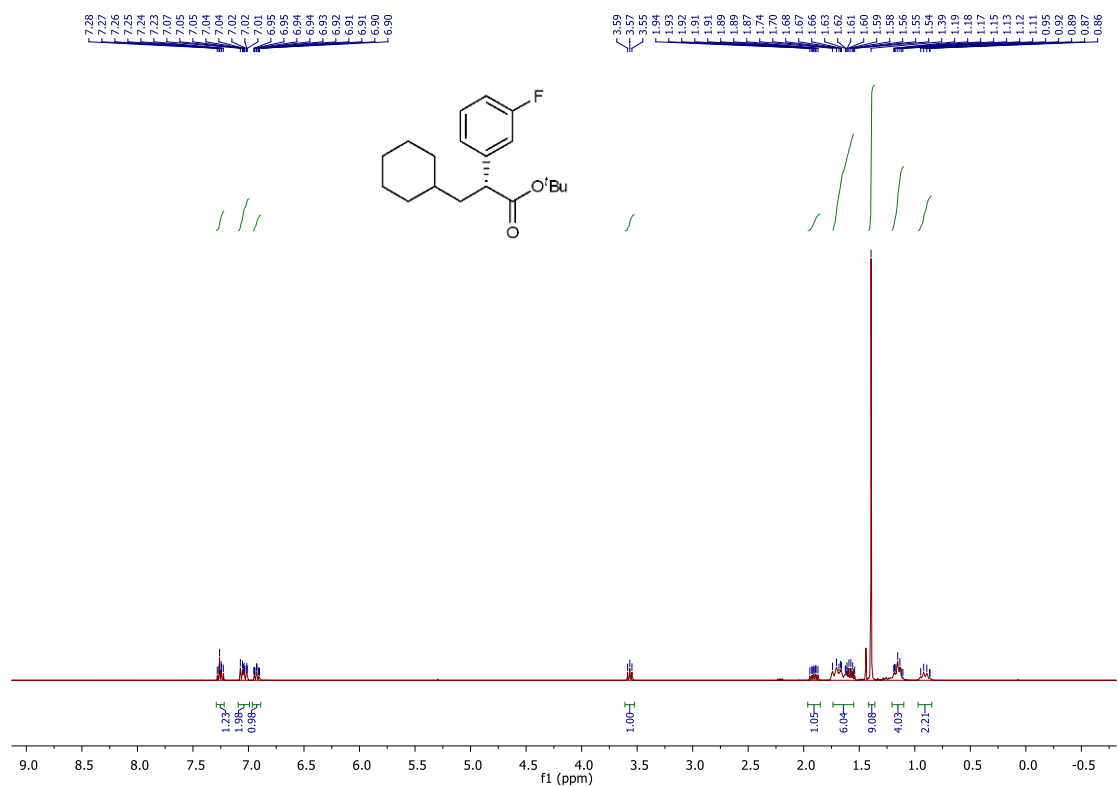

Supplementary Figure 54. <sup>1</sup>H NMR of compound 20.

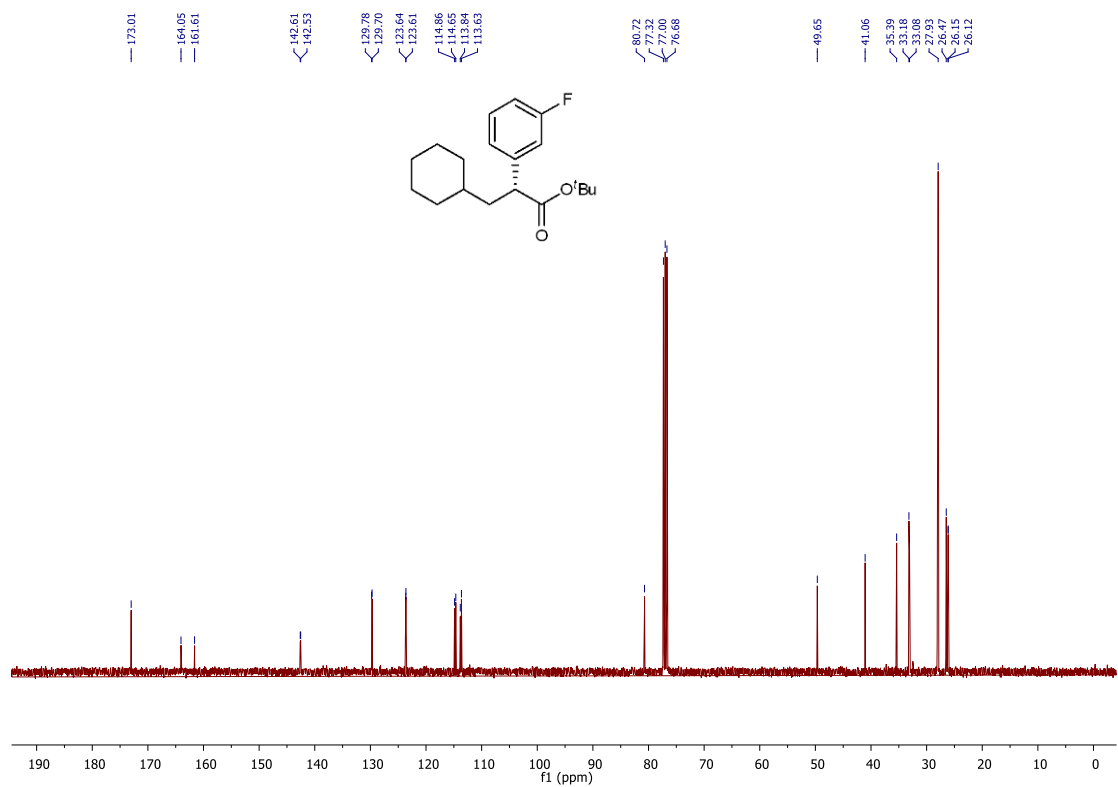

Supplementary Figure 55.  $^{13}\text{C}$  NMR of compound 20.

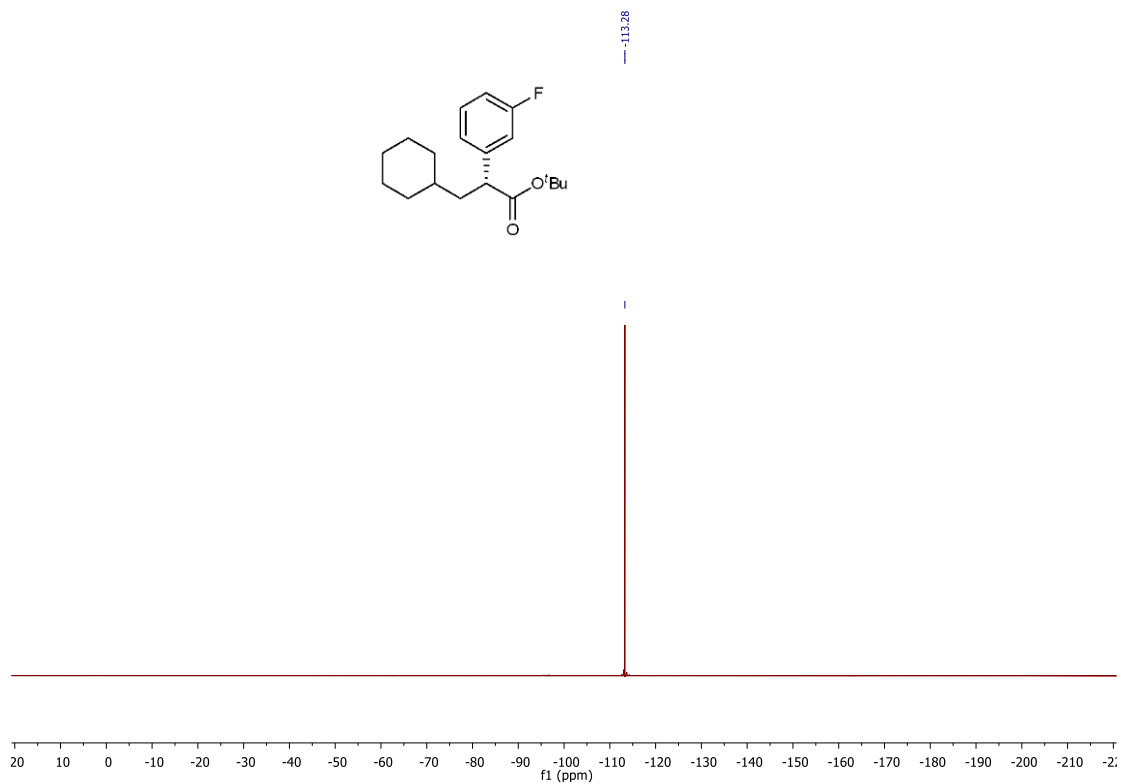

Supplementary Figure 56.  $^{19}\text{F}$  NMR of compound 20.

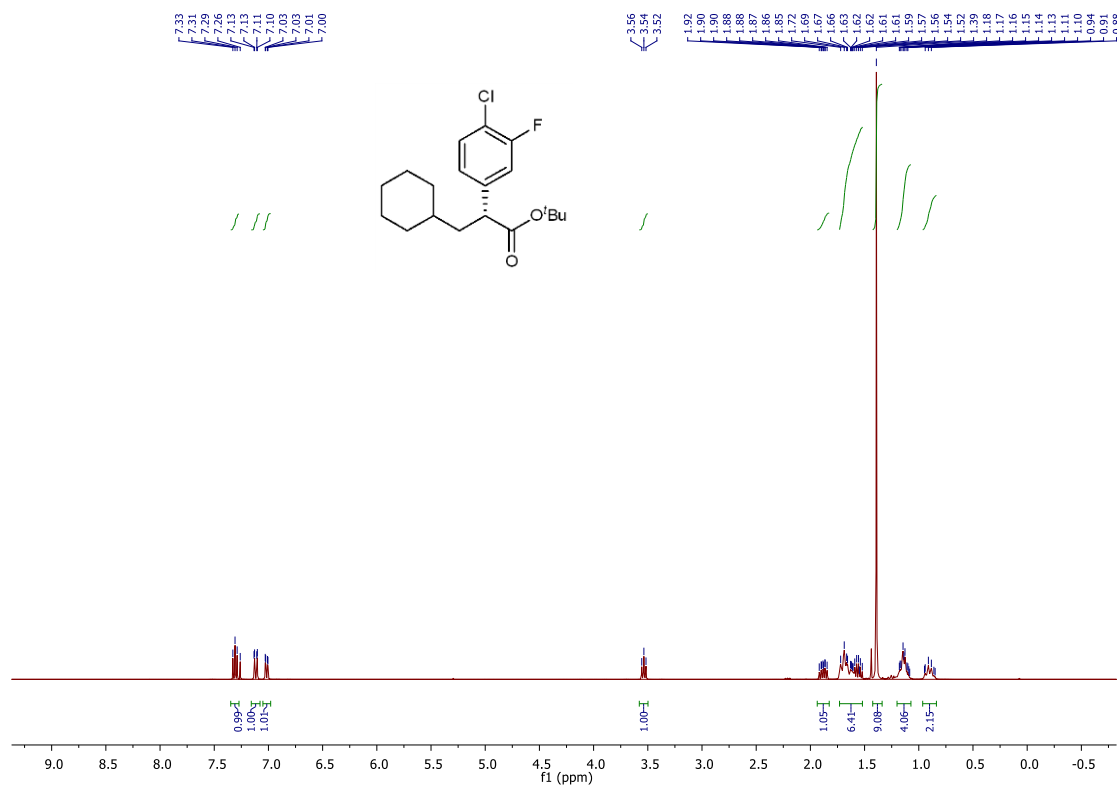

Supplementary Figure 57. <sup>1</sup>H NMR of compound 21.

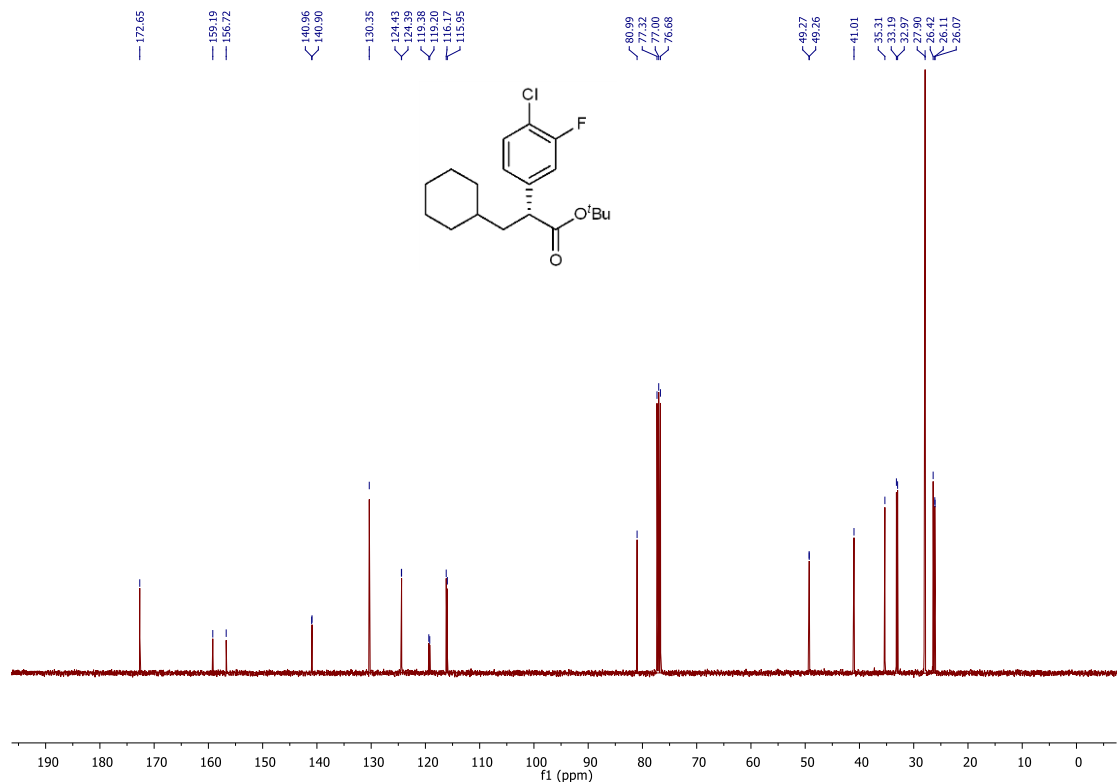

Supplementary Figure 58. <sup>13</sup>C NMR of compound 21.

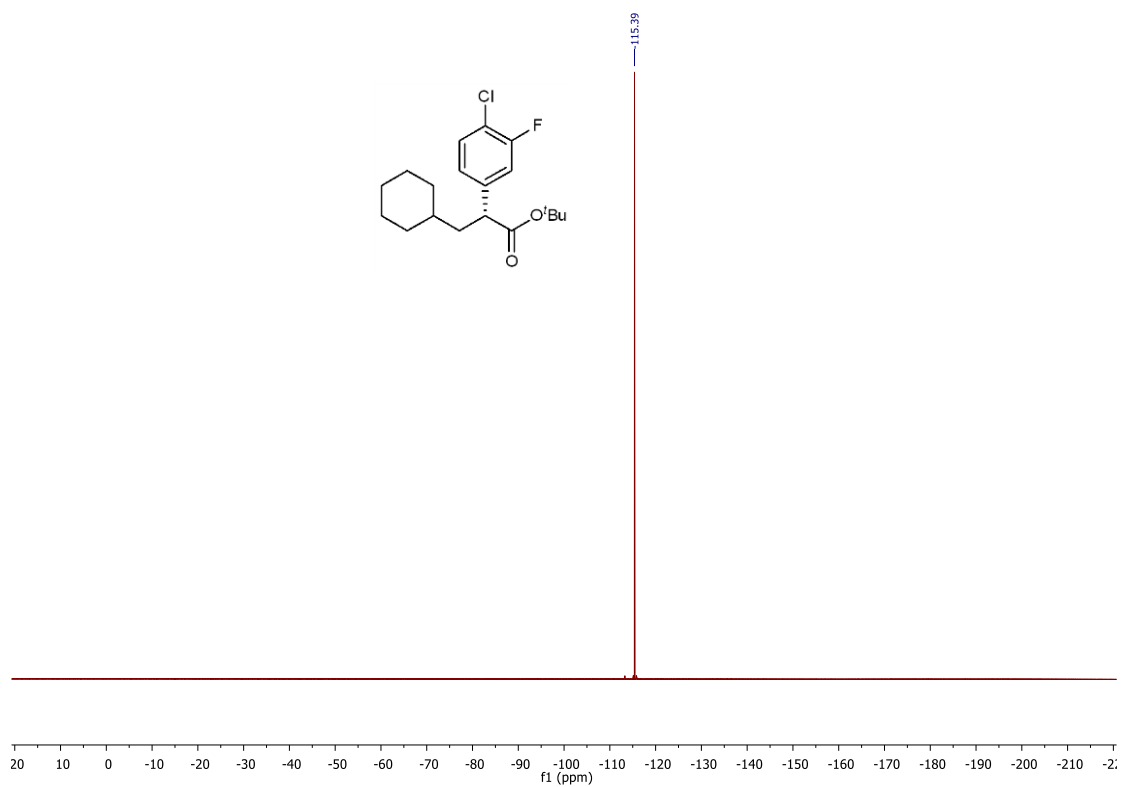

Supplementary Figure 59. <sup>19</sup>F NMR of compound 21.

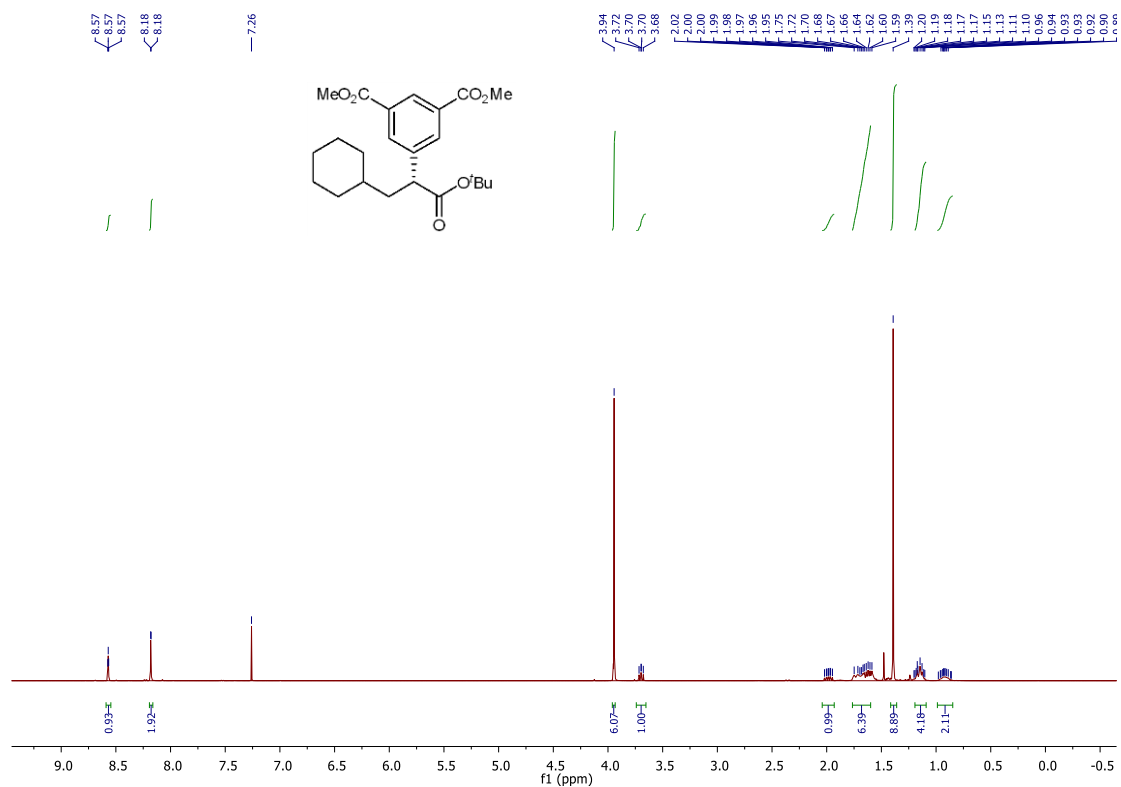

Supplementary Figure 60. <sup>1</sup>H NMR of compound 22.



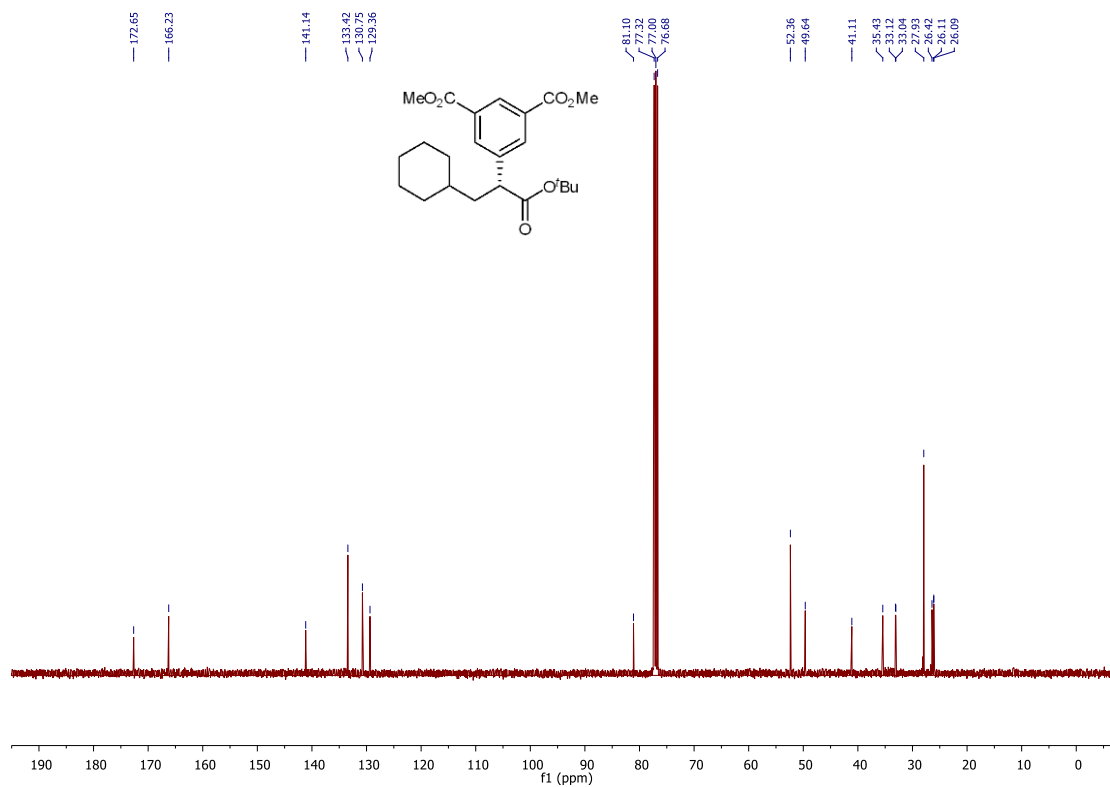

Supplementary Figure 61. <sup>13</sup>C NMR of compound 22.

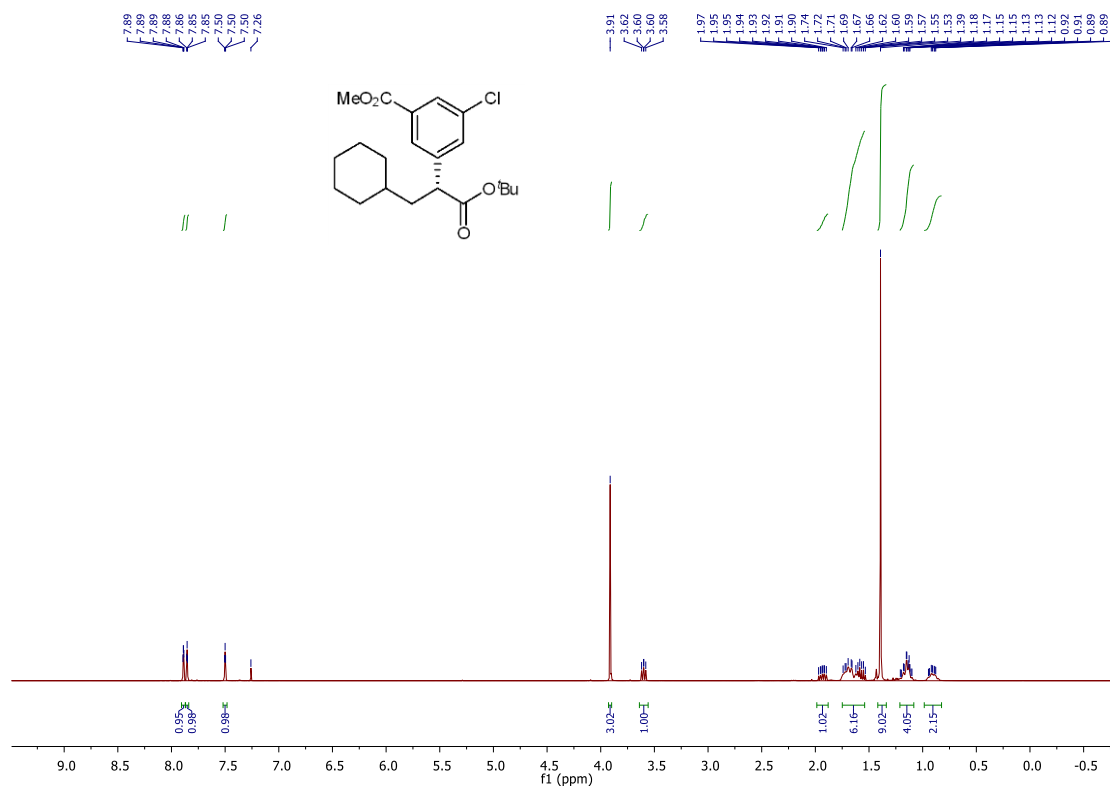

Supplementary Figure 62. <sup>1</sup>H NMR of compound 23.

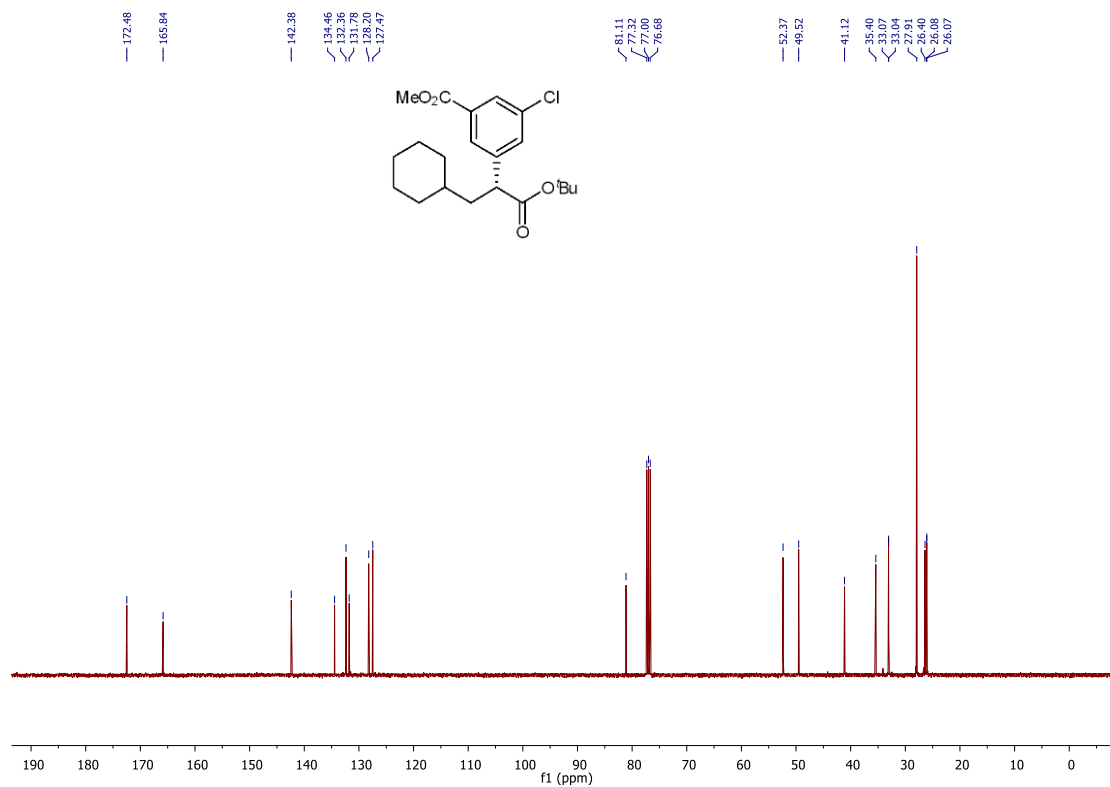

Supplementary Figure 63. <sup>13</sup>C NMR of compound 23.

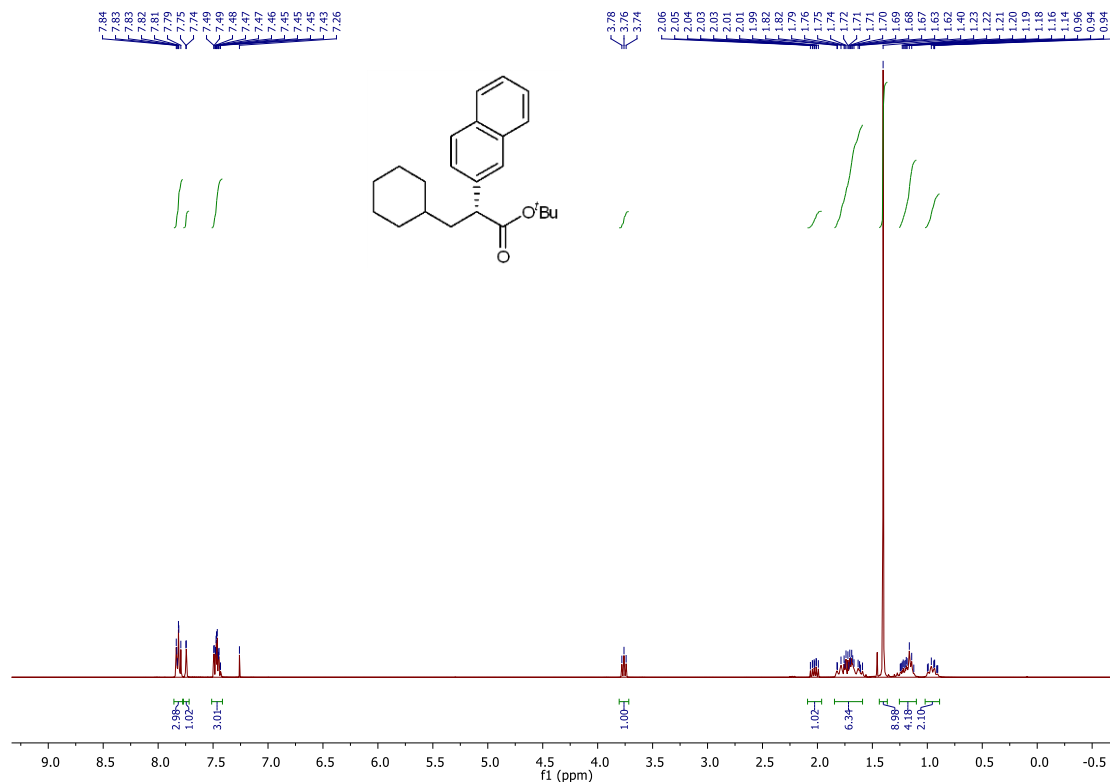

Supplementary Figure 64. <sup>1</sup>H NMR of compound 24.

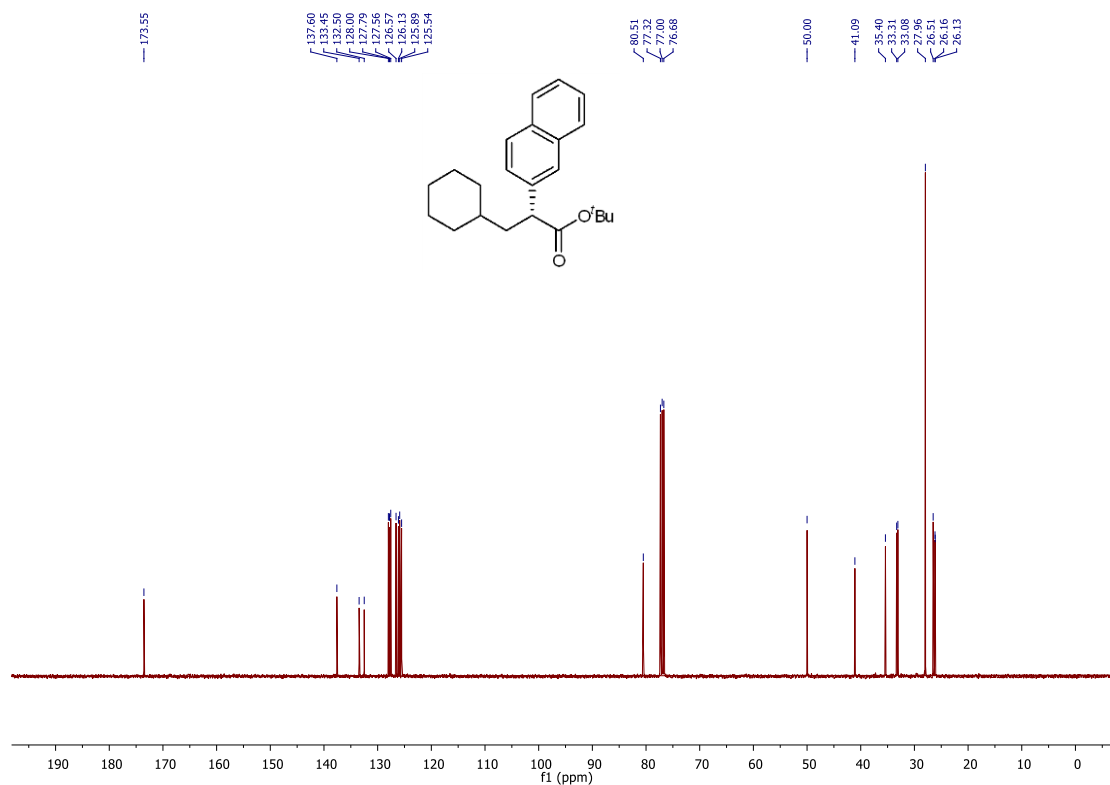

Supplementary Figure 65.  $^{13}\text{C}$  NMR of compound 24.

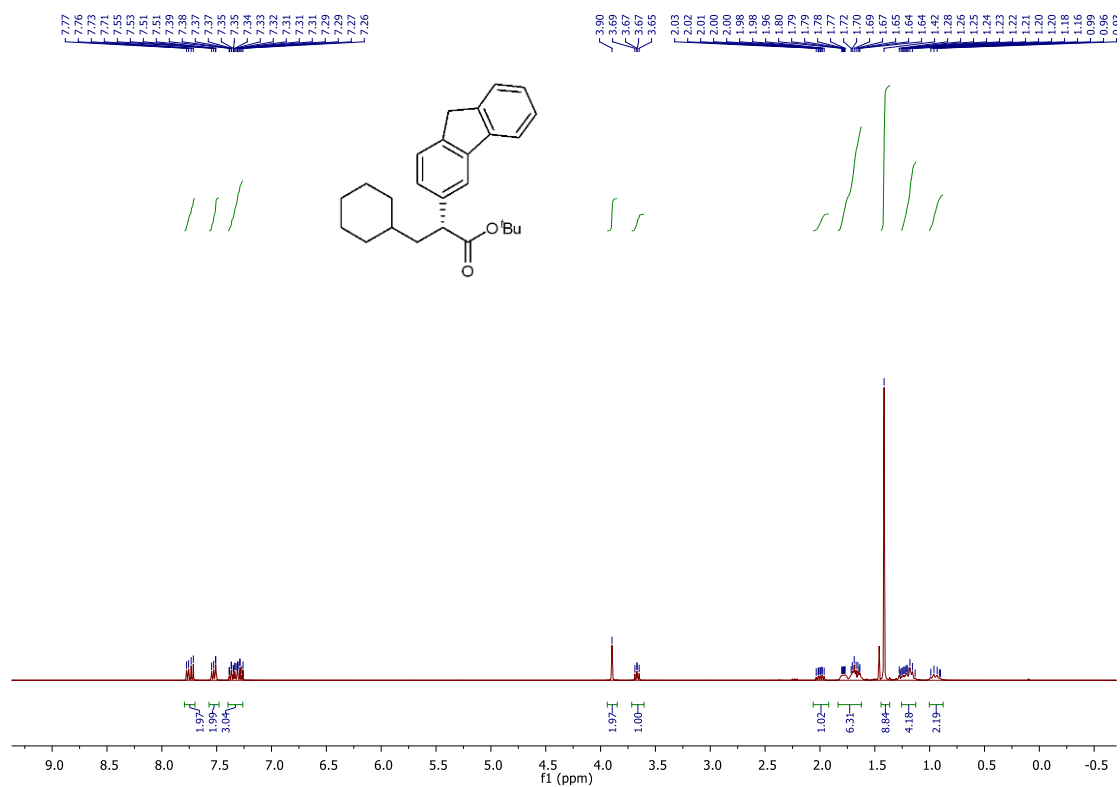

Supplementary Figure 66.  $^1\text{H}$  NMR of compound 25.

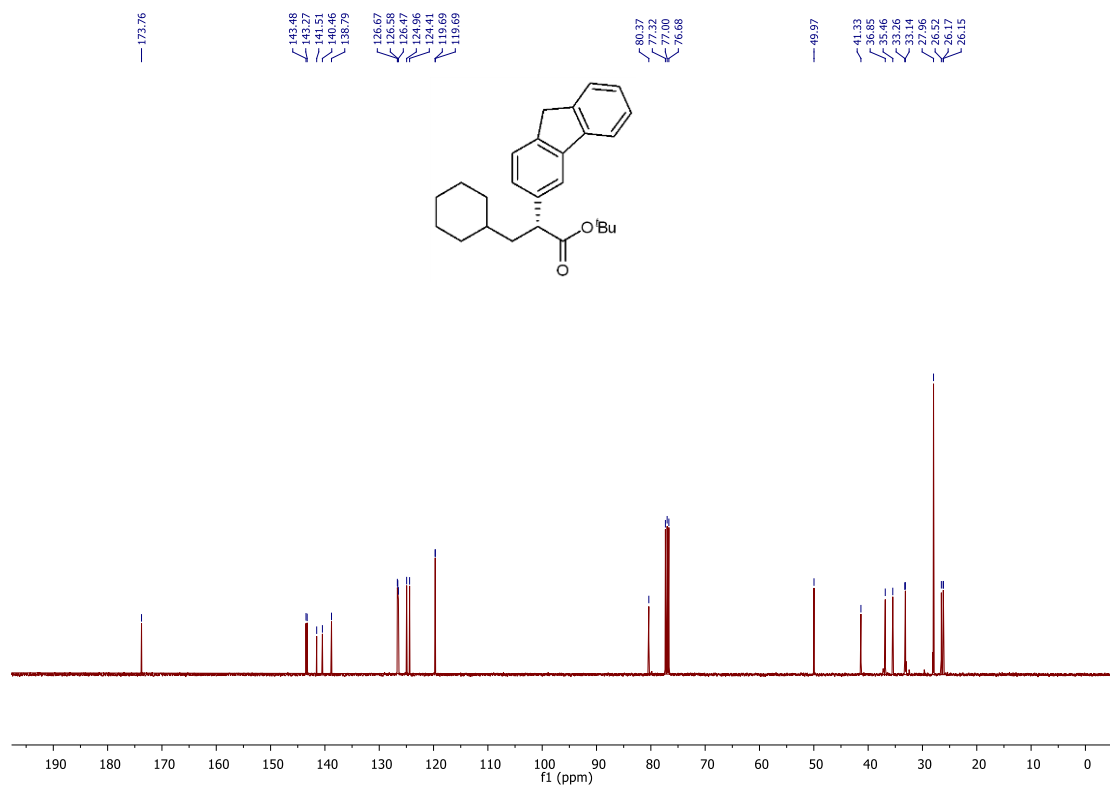

Supplementary Figure 67.  $^{13}\text{C}$  NMR of compound 25.

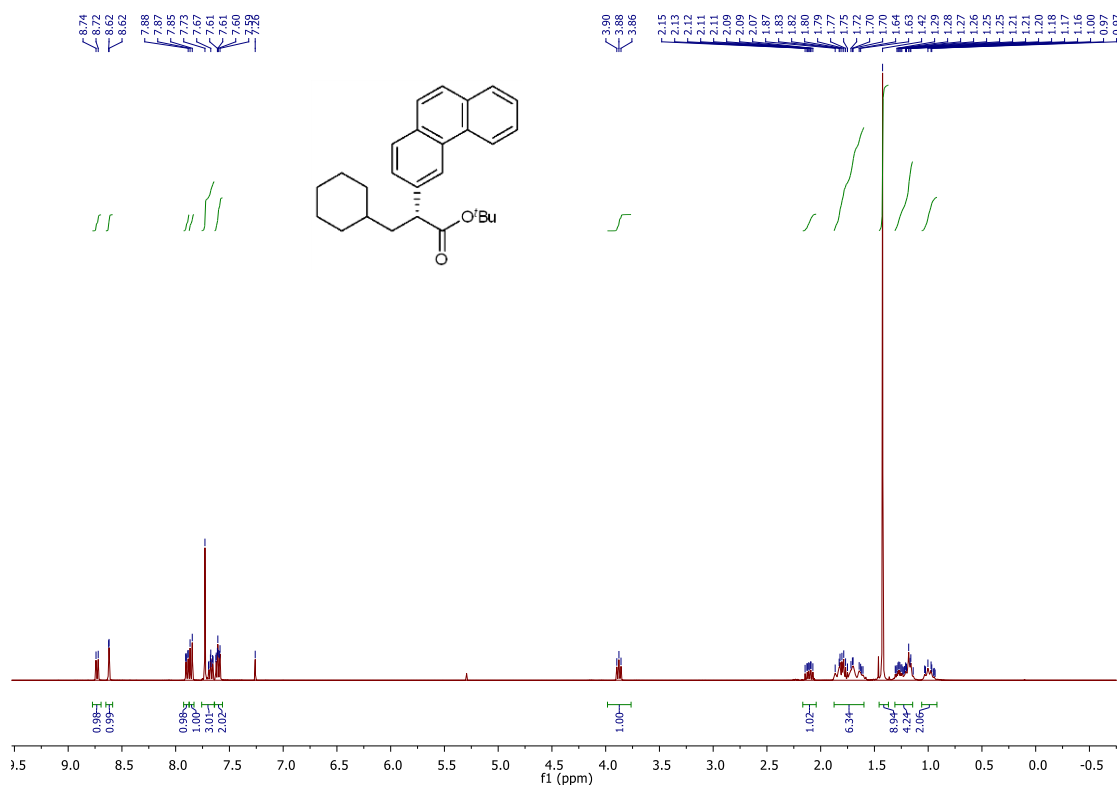

Supplementary Figure 68.  $^1\text{H}$  NMR of compound 26.

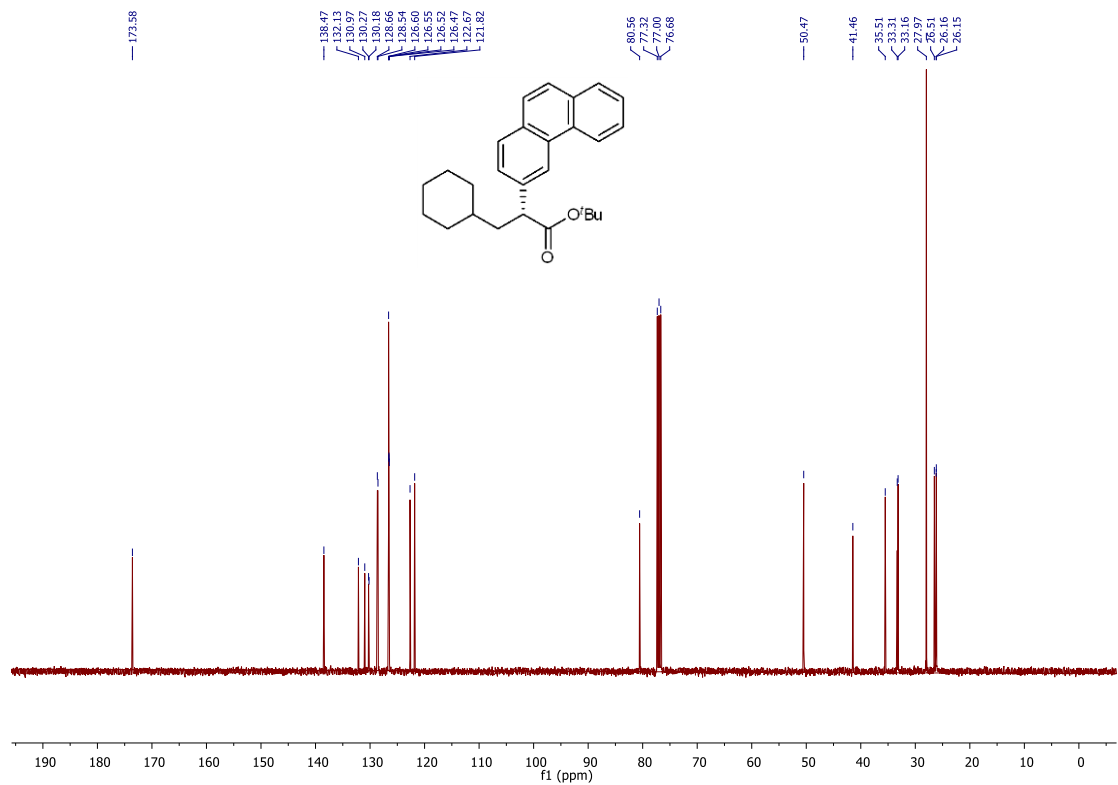

Supplementary Figure 69.  $^{13}\text{C}$  NMR of compound 26.

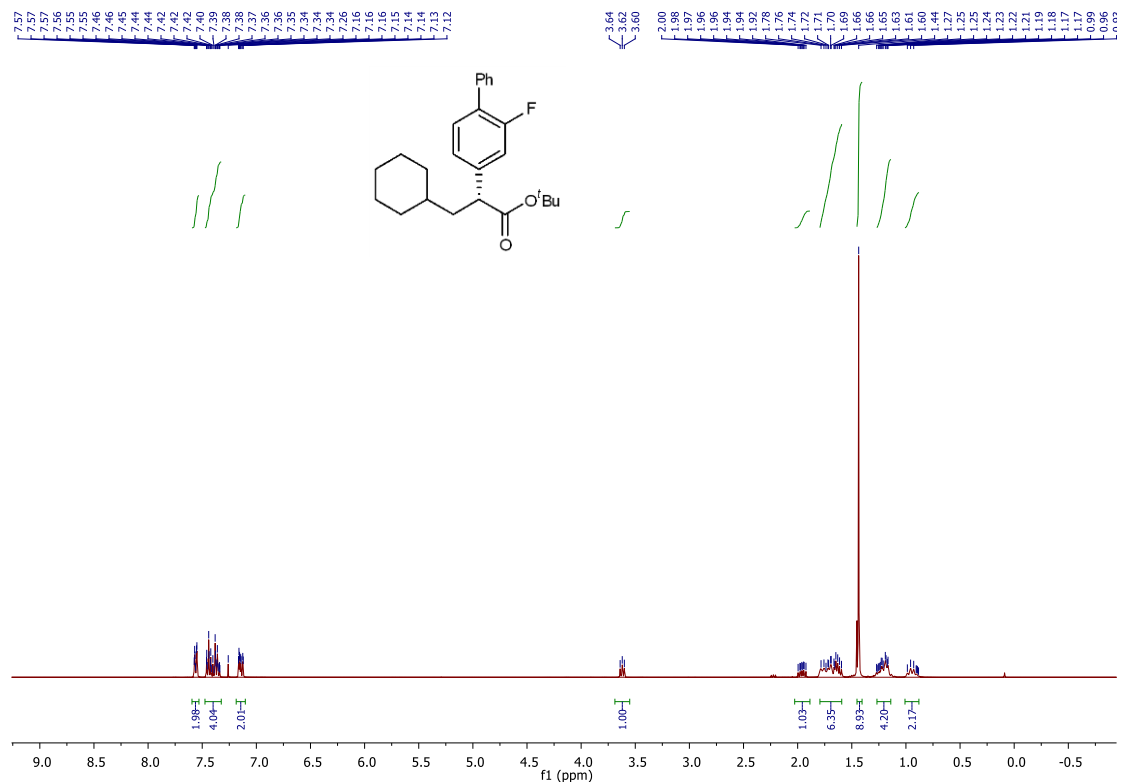

Supplementary Figure 70.  $^1\text{H}$  NMR of compound 27.

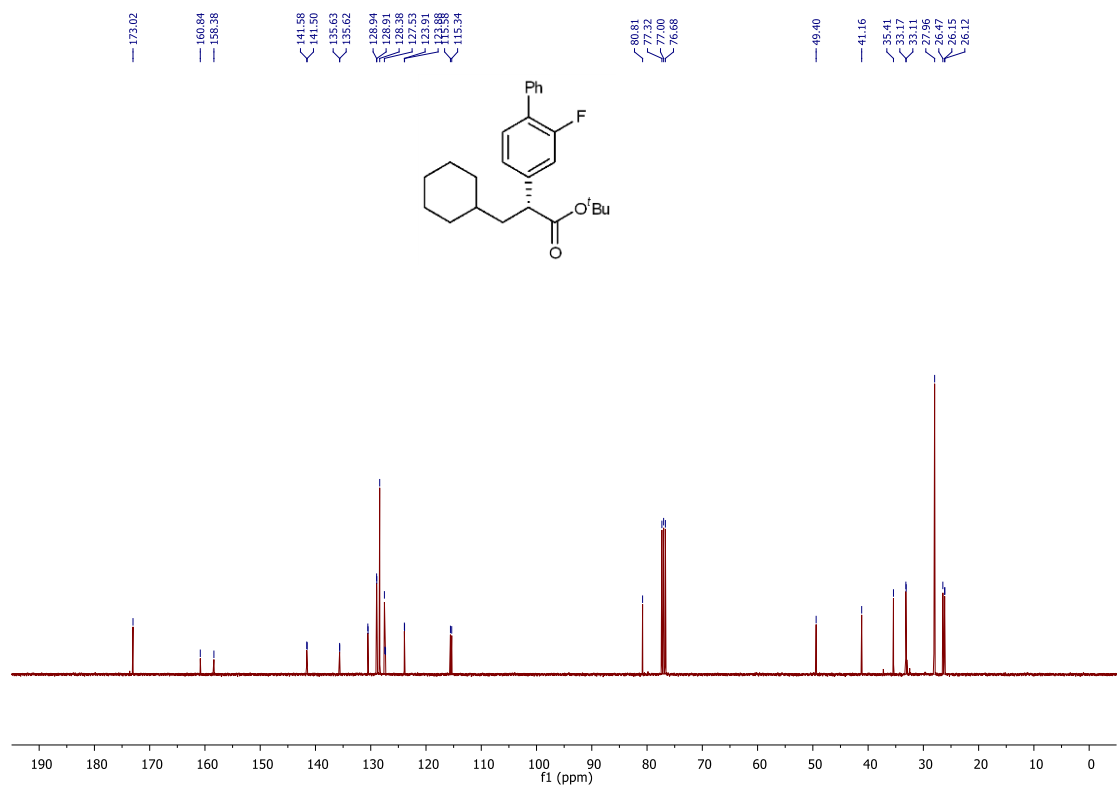

Supplementary Figure 71. <sup>13</sup>C NMR of compound 27.

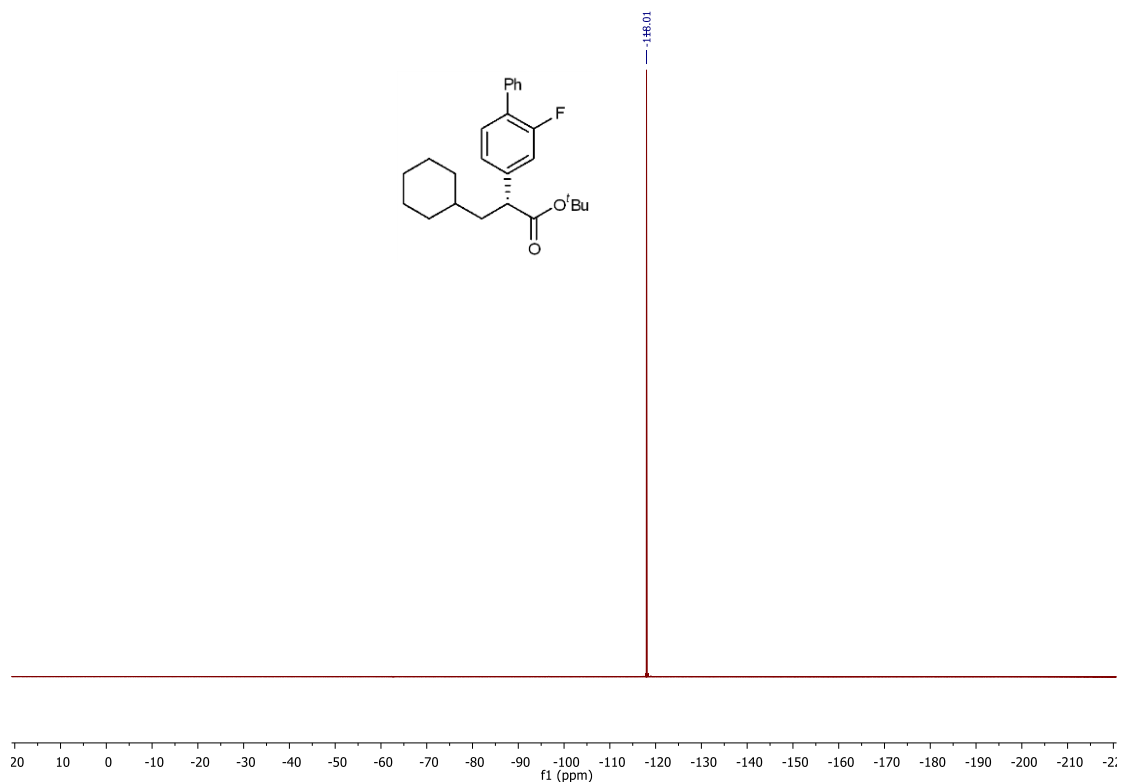

Supplementary Figure 72. <sup>19</sup>F NMR of compound 27.

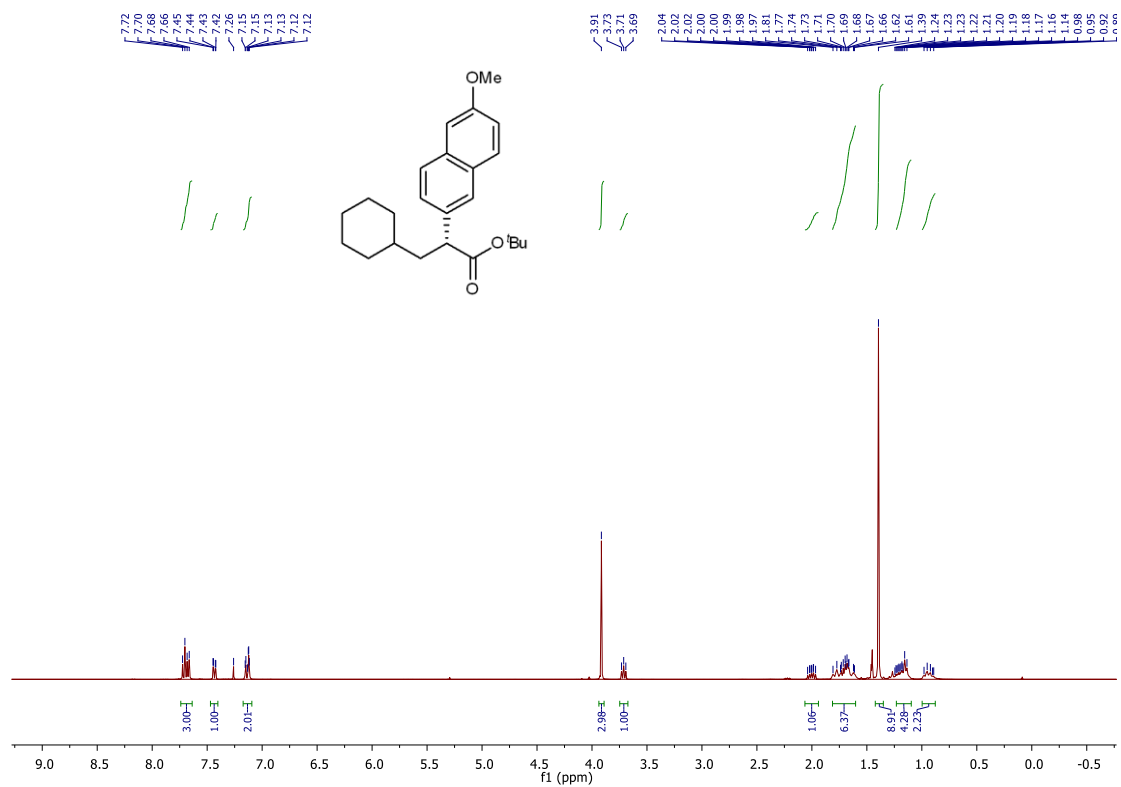

Supplementary Figure 73. <sup>1</sup>H NMR of compound 28.

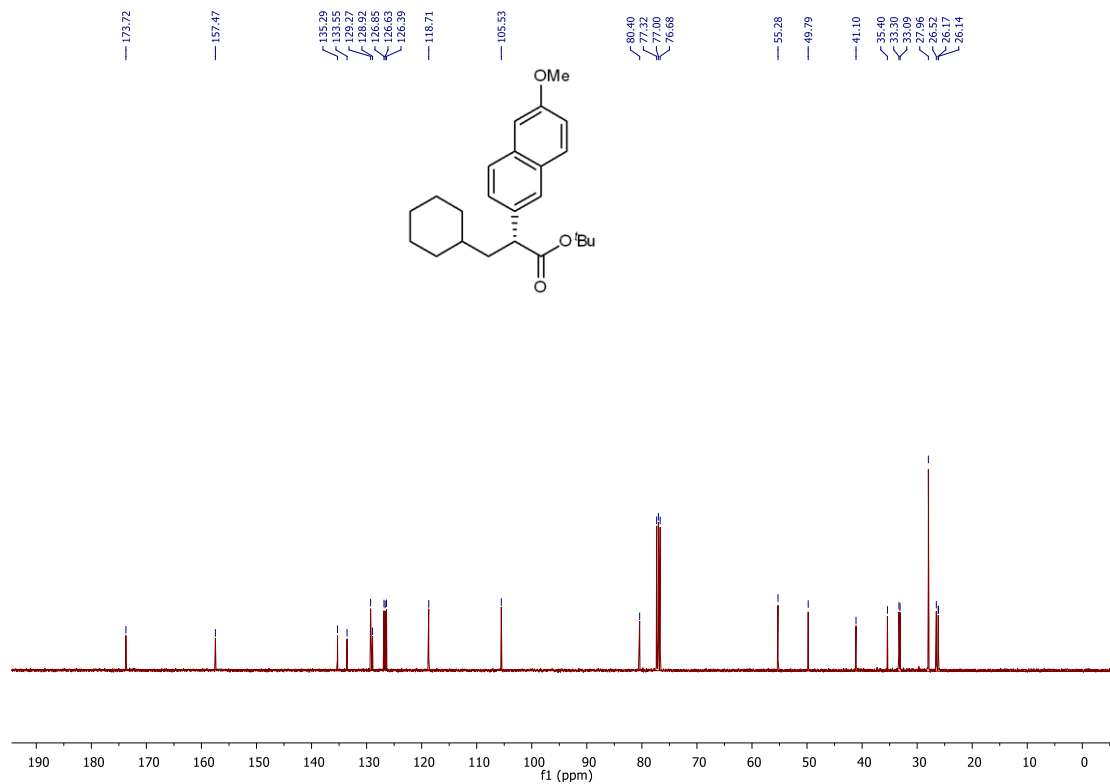

Supplementary Figure 74. <sup>13</sup>C NMR of compound 28.





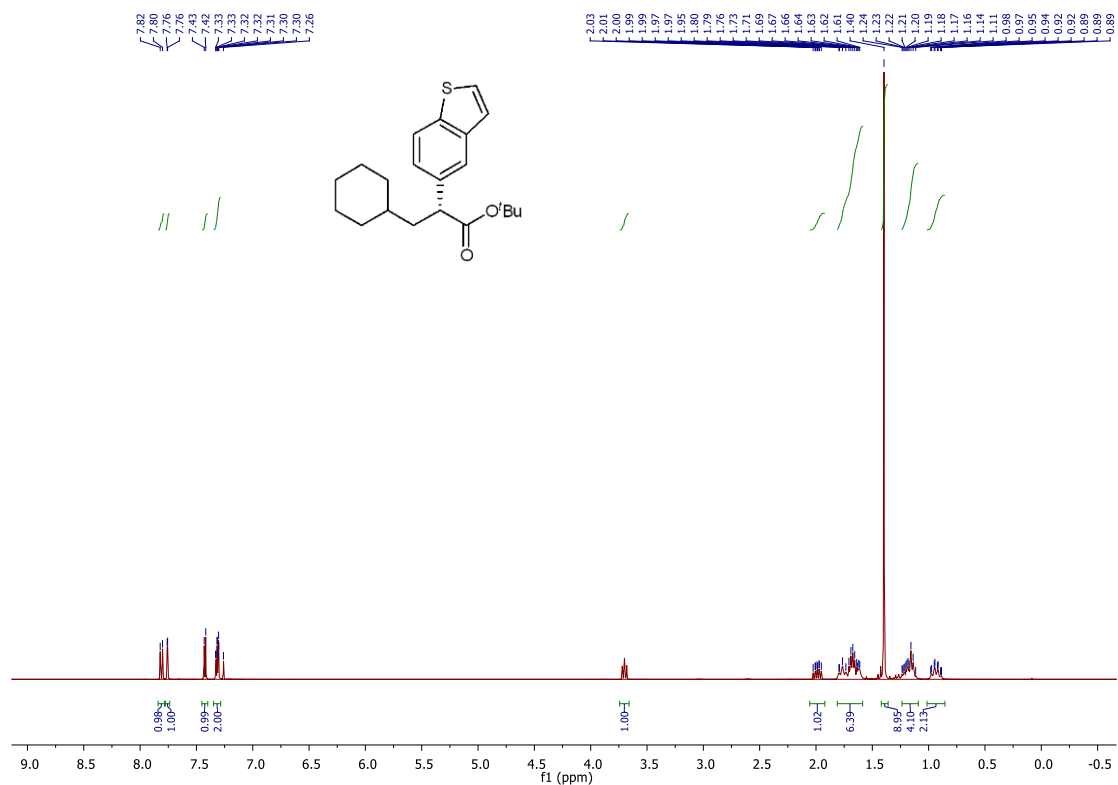

Supplementary Figure 77. <sup>1</sup>H NMR of compound 30.

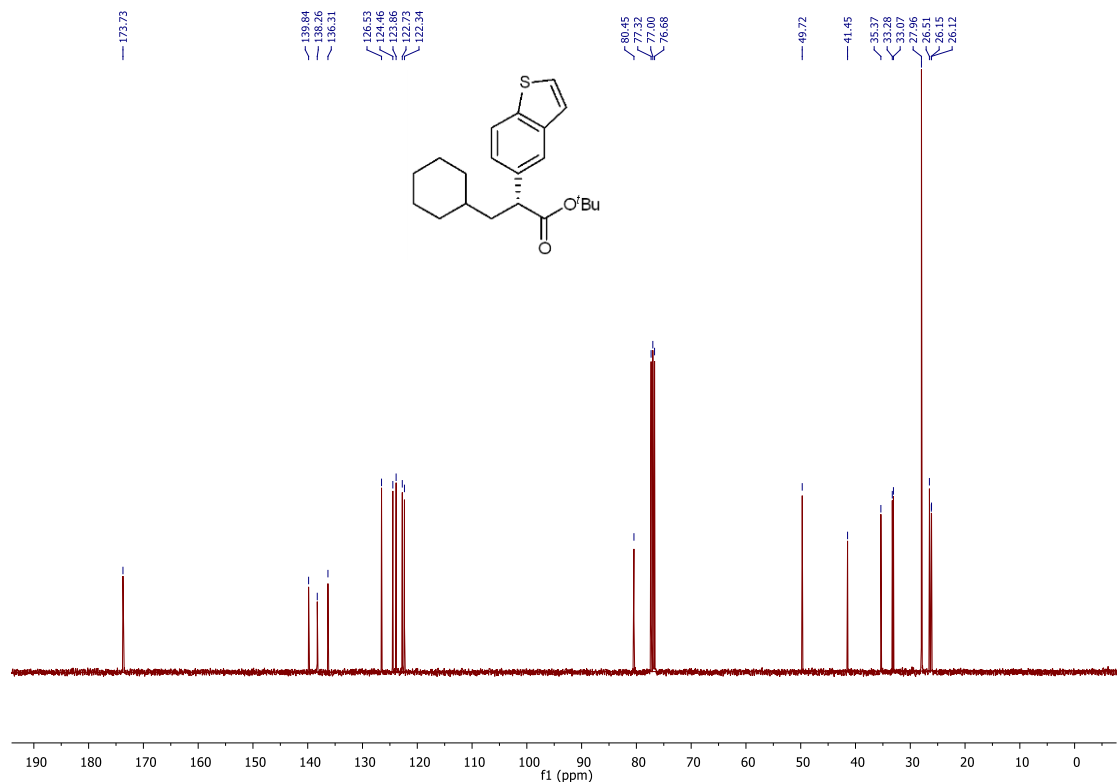

Supplementary Figure 78. <sup>13</sup>C NMR of compound 30.

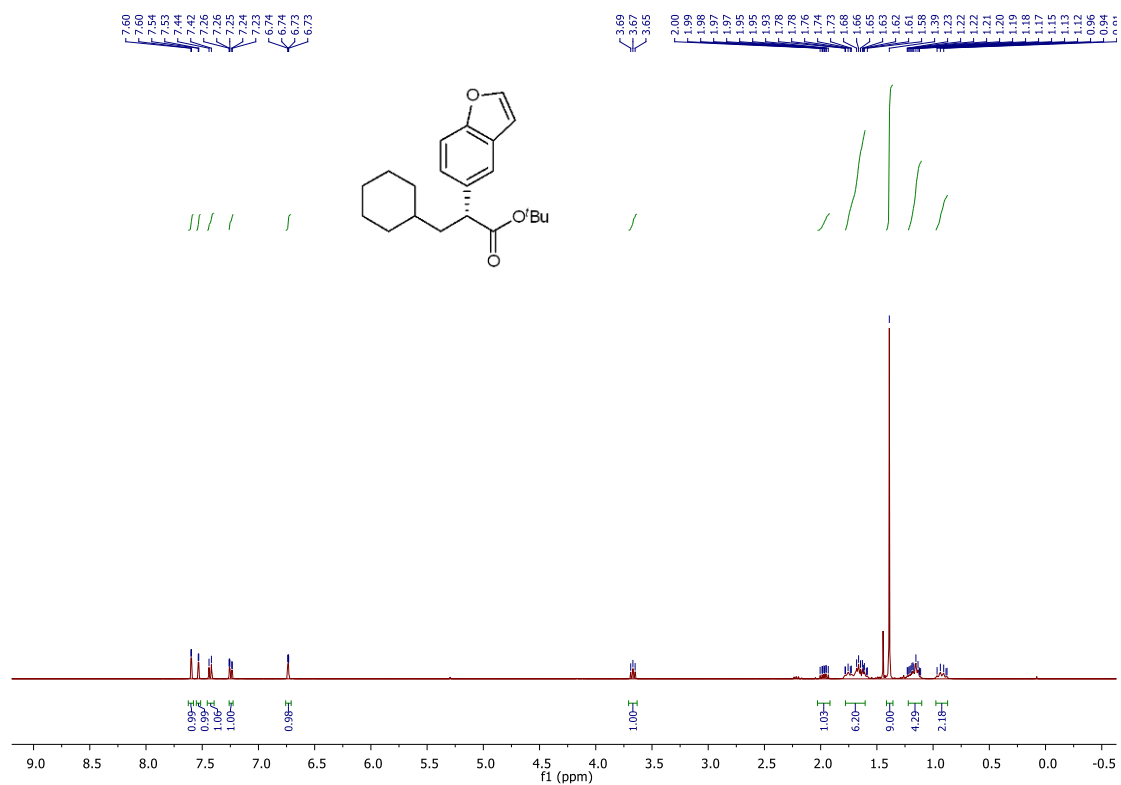

Supplementary Figure 79. <sup>1</sup>H NMR of compound 31.

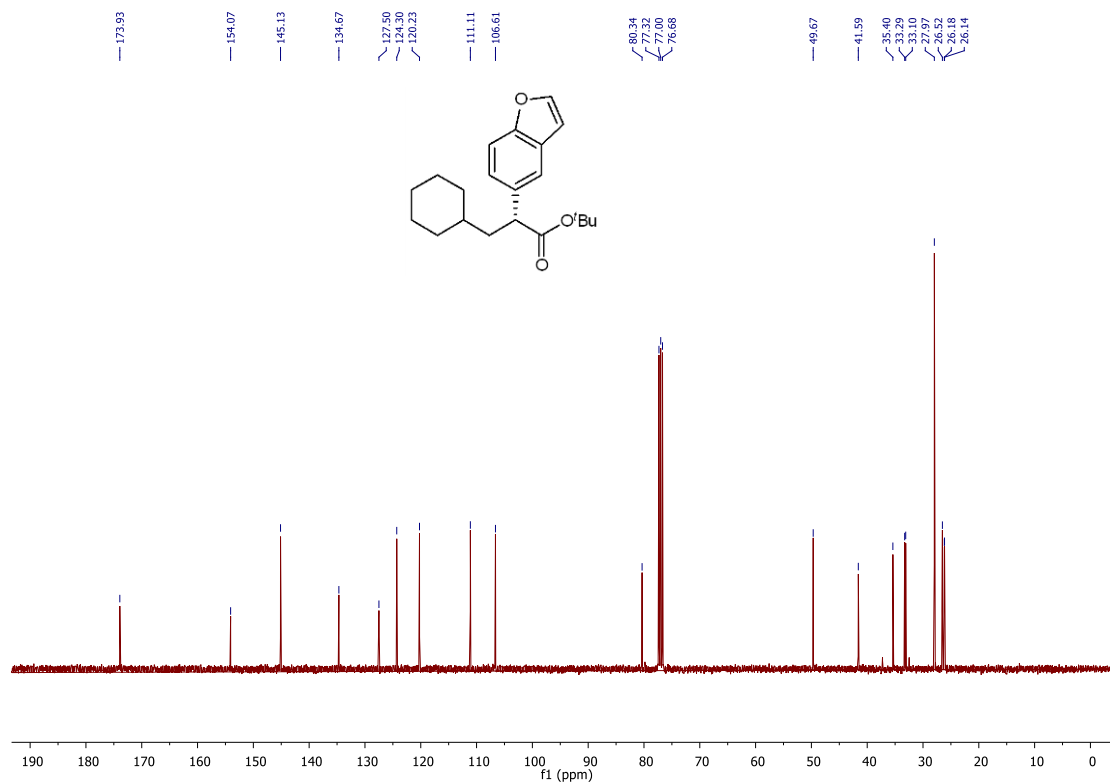

Supplementary Figure 80. <sup>13</sup>C NMR of compound 31.

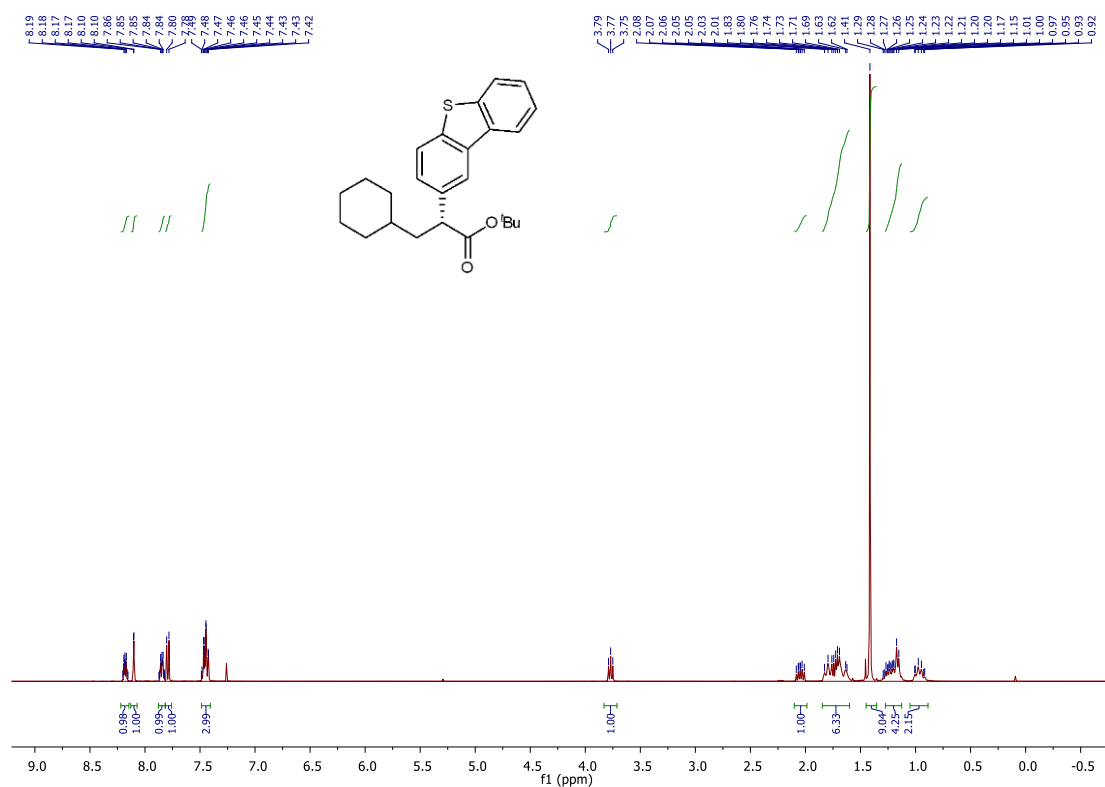

Supplementary Figure 81. <sup>1</sup>H NMR of compound 32.

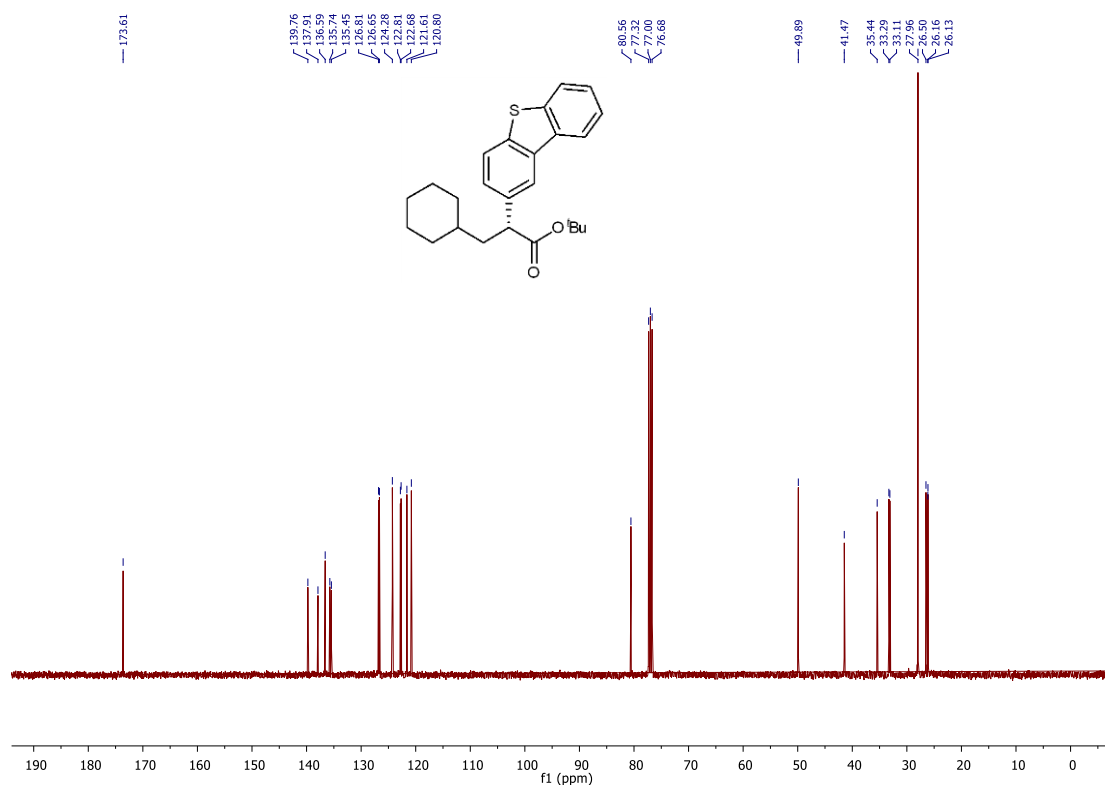

Supplementary Figure 82. <sup>13</sup>C NMR of compound 32.

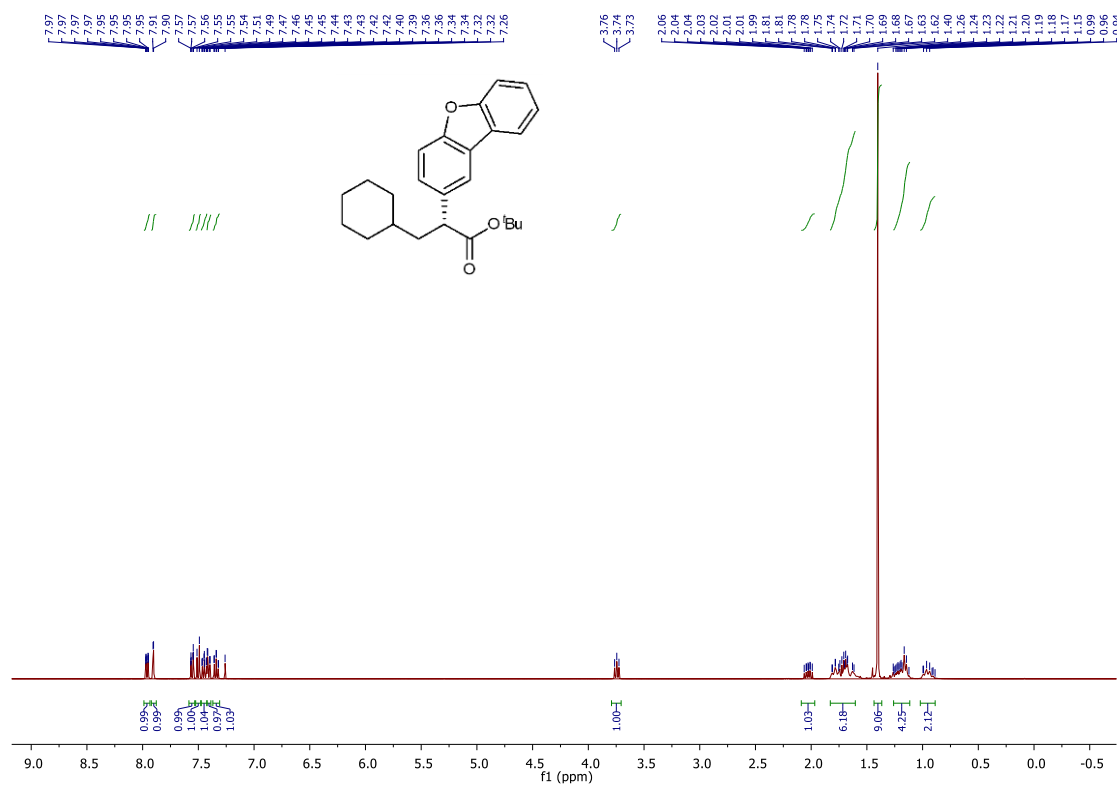

Supplementary Figure 83. <sup>1</sup>H NMR of compound 33.

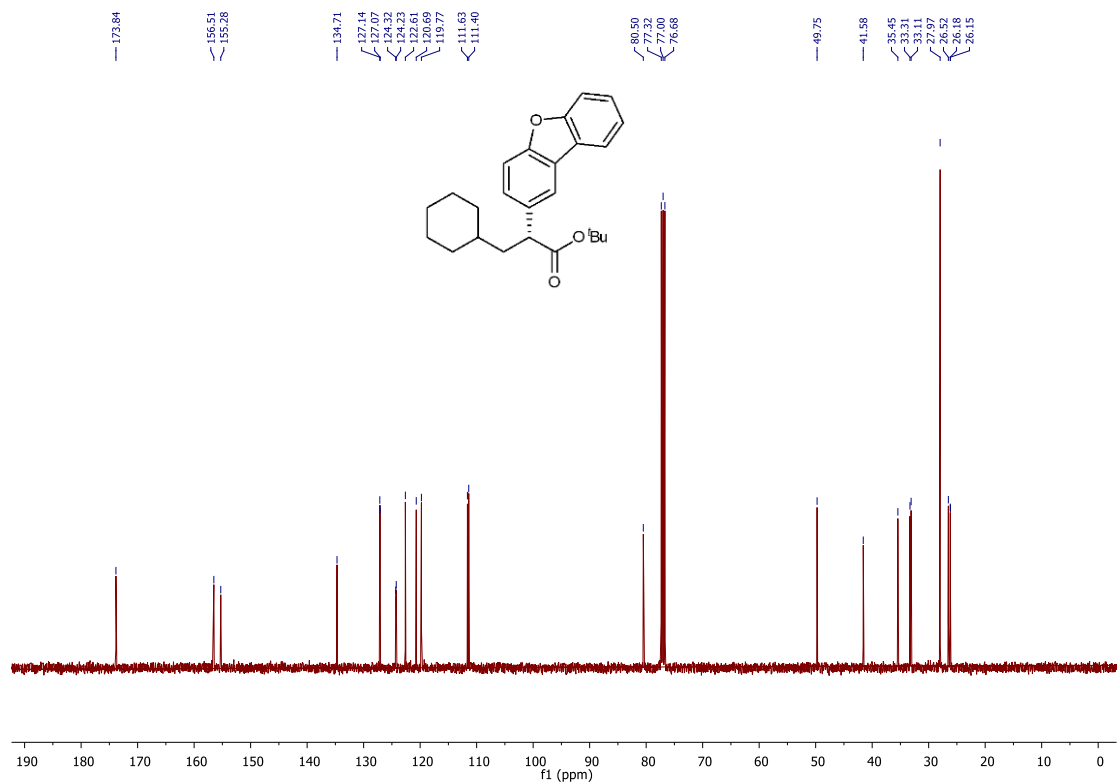

Supplementary Figure 84. <sup>13</sup>C NMR of compound 33.

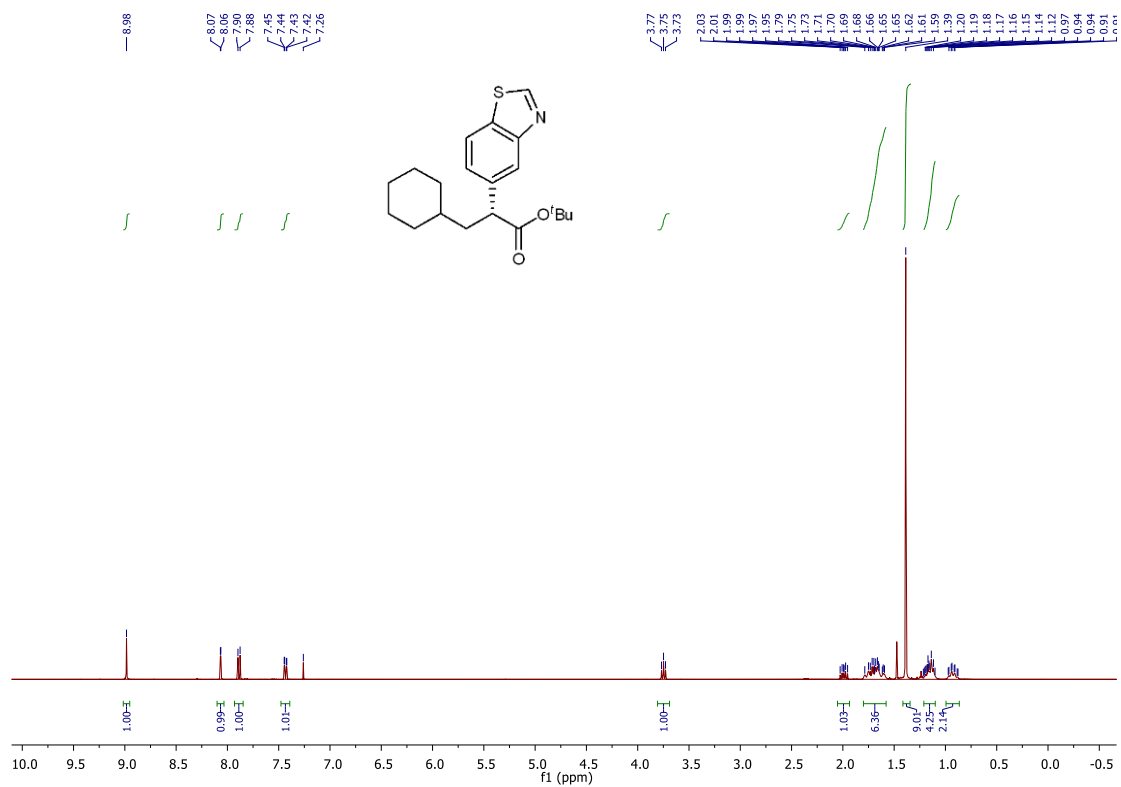

Supplementary Figure 85. <sup>1</sup>H NMR of compound 34.

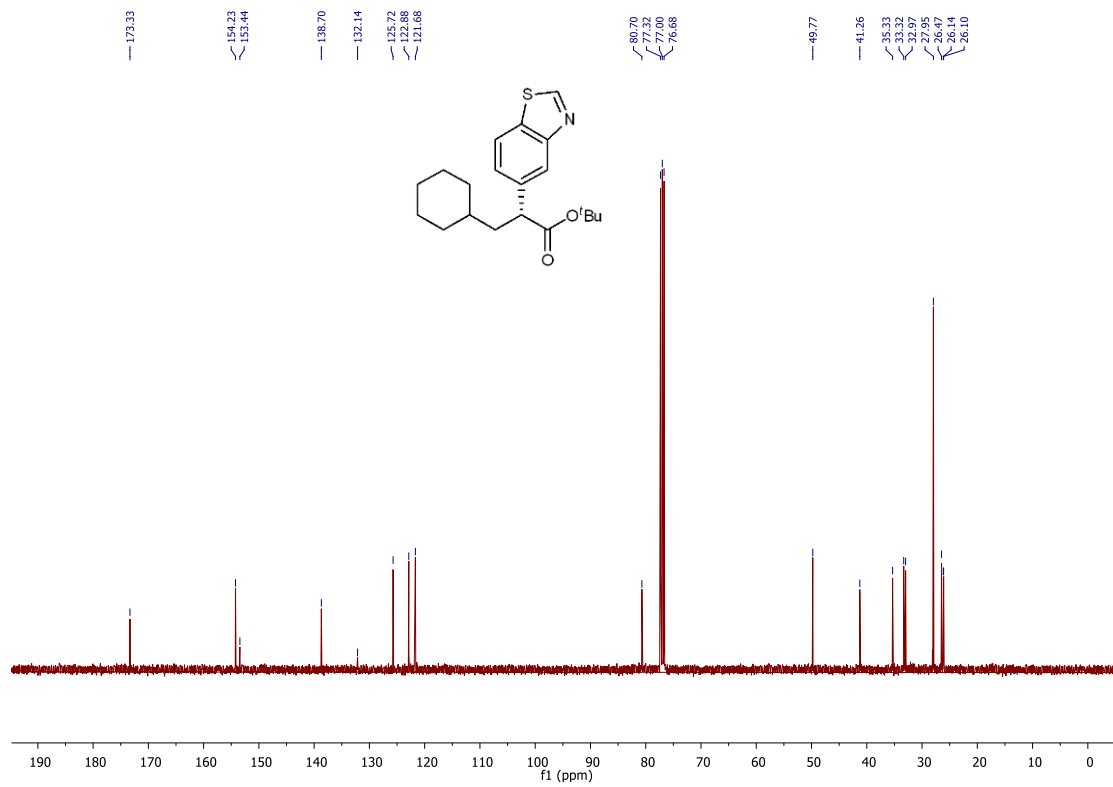

Supplementary Figure 86. <sup>13</sup>C NMR of compound 34.

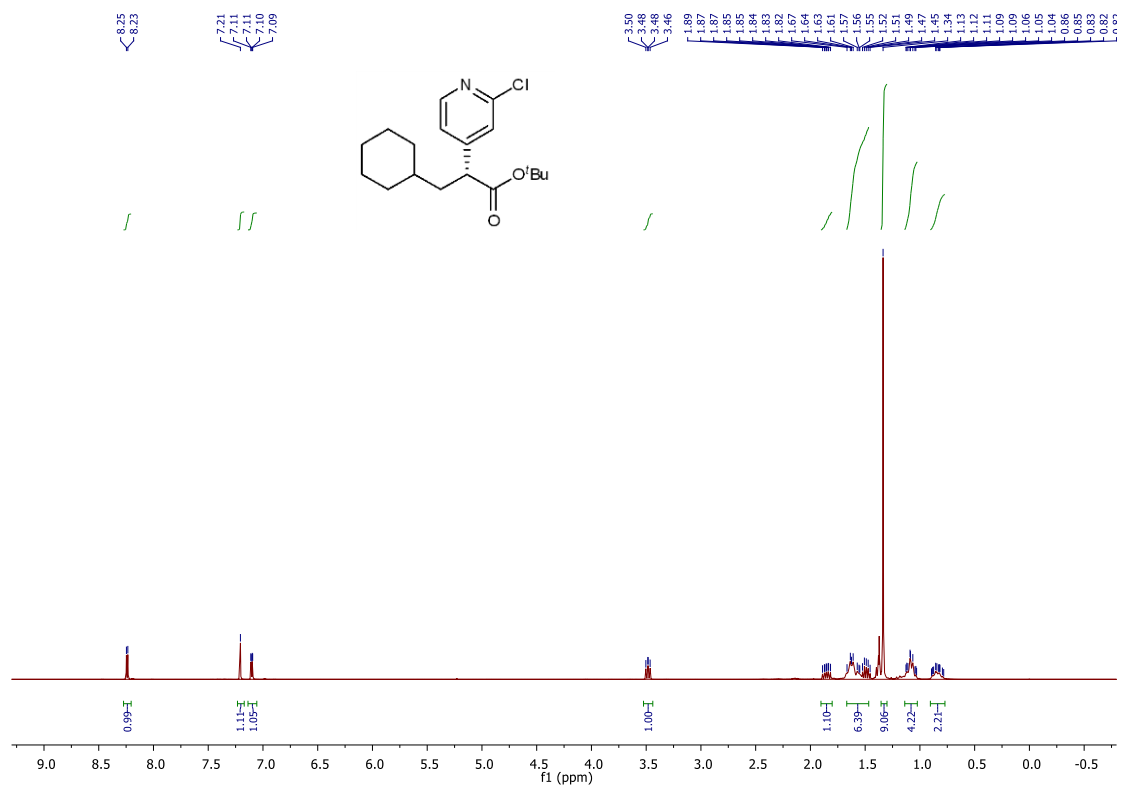

Supplementary Figure 87. <sup>1</sup>H NMR of compound 35.

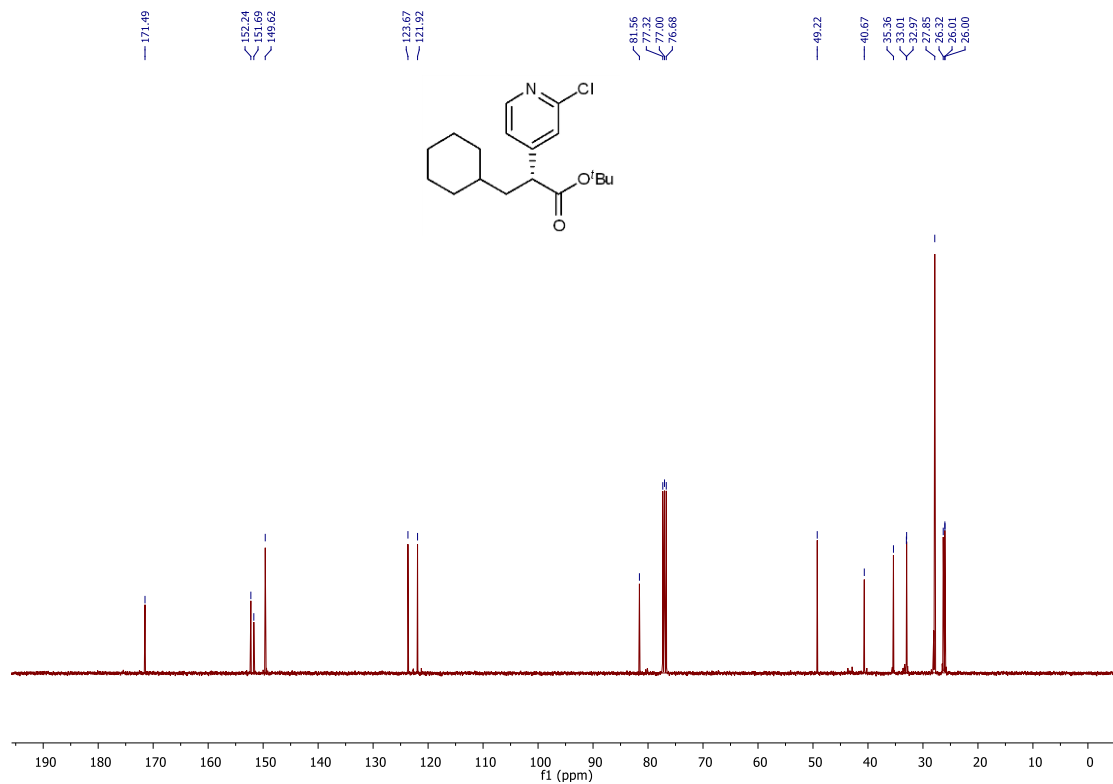

Supplementary Figure 88. <sup>13</sup>C NMR of compound 35.

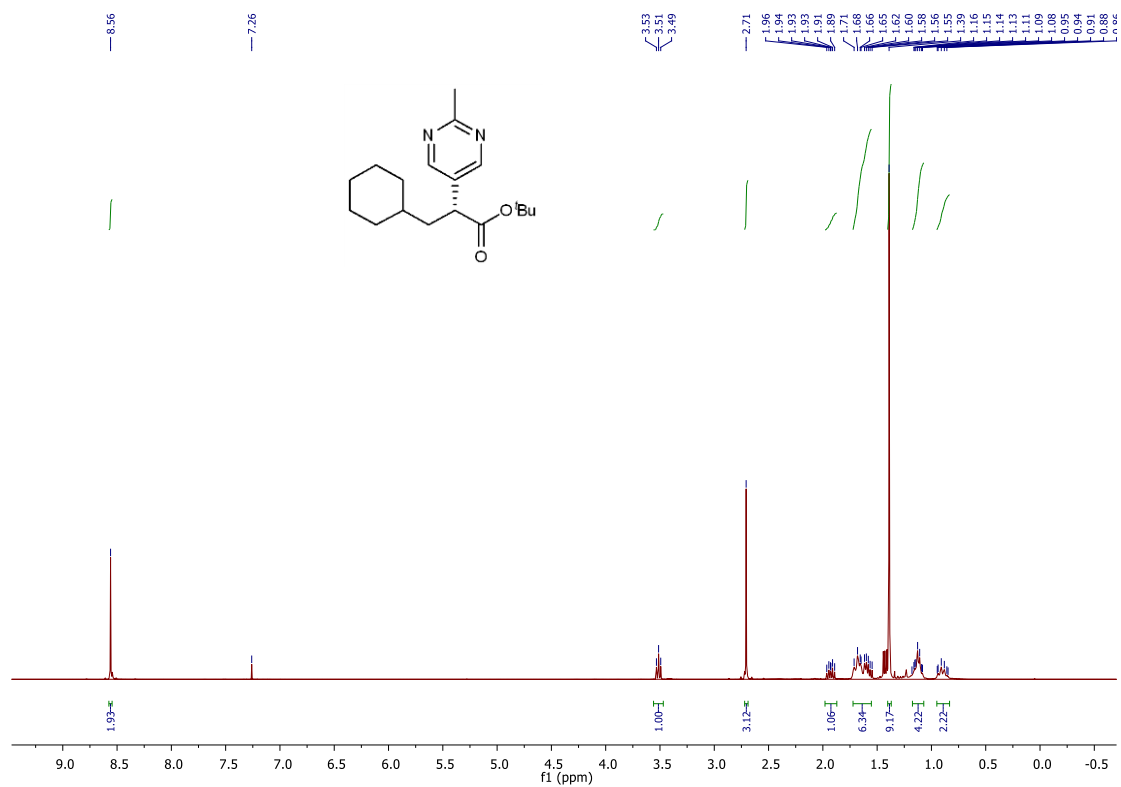

Supplementary Figure 89. <sup>1</sup>H NMR of compound 36.

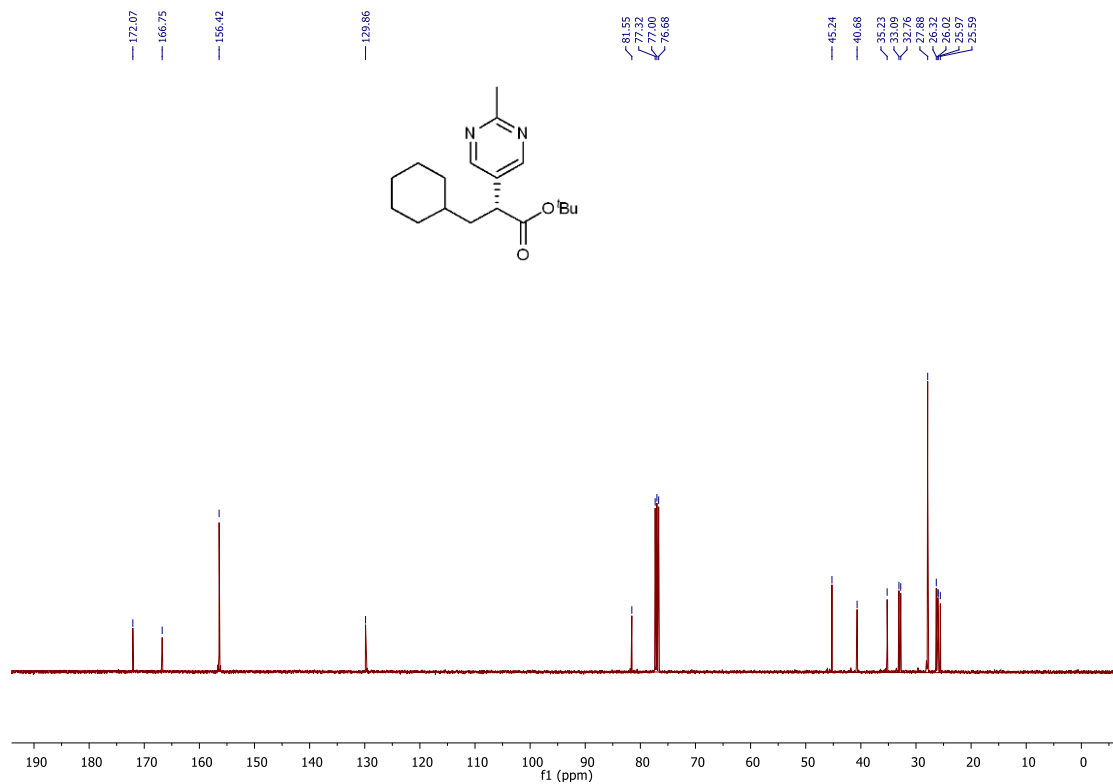

Supplementary Figure 90. <sup>13</sup>C NMR of compound 36.

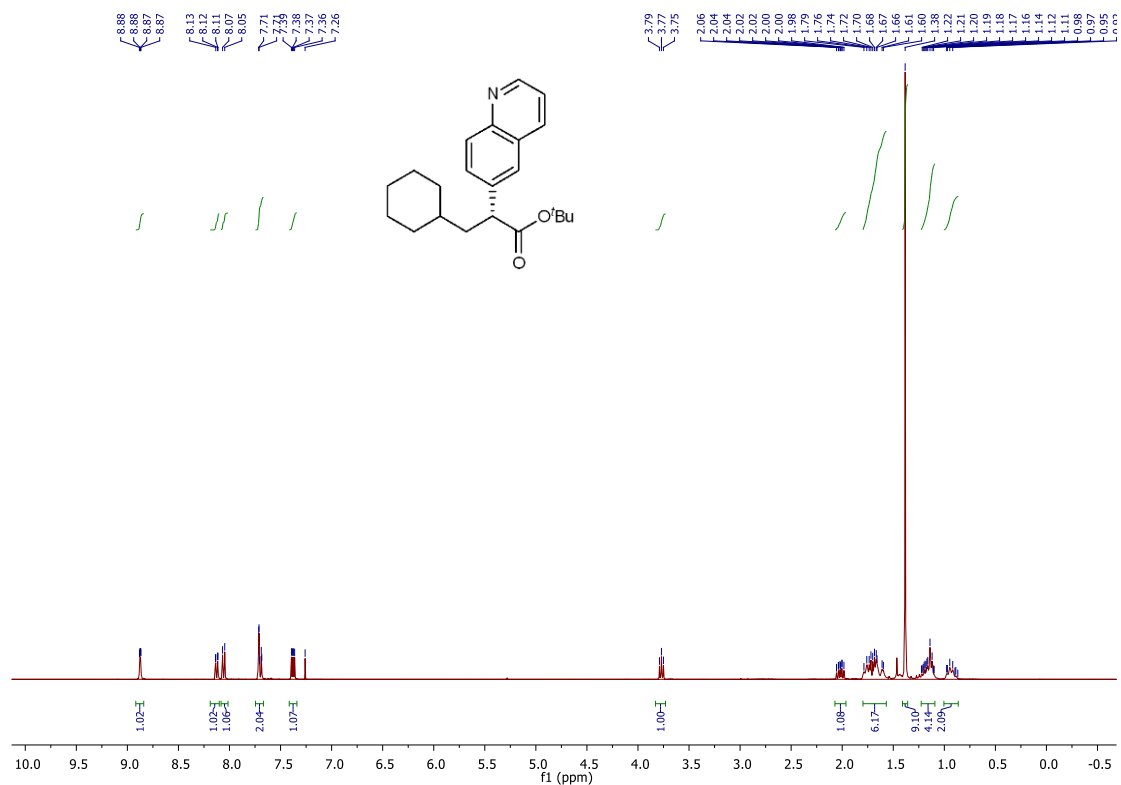

Supplementary Figure 91. <sup>1</sup>H NMR of compound 37.

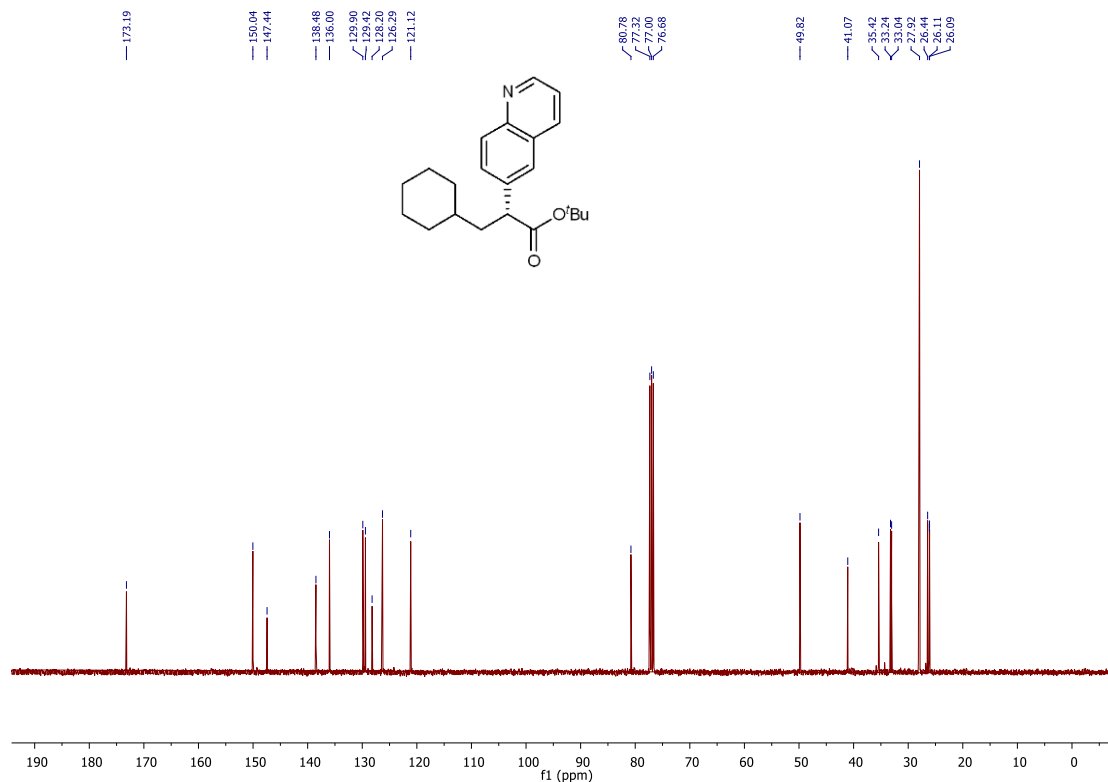

Supplementary Figure 92. <sup>13</sup>C NMR of compound 37.



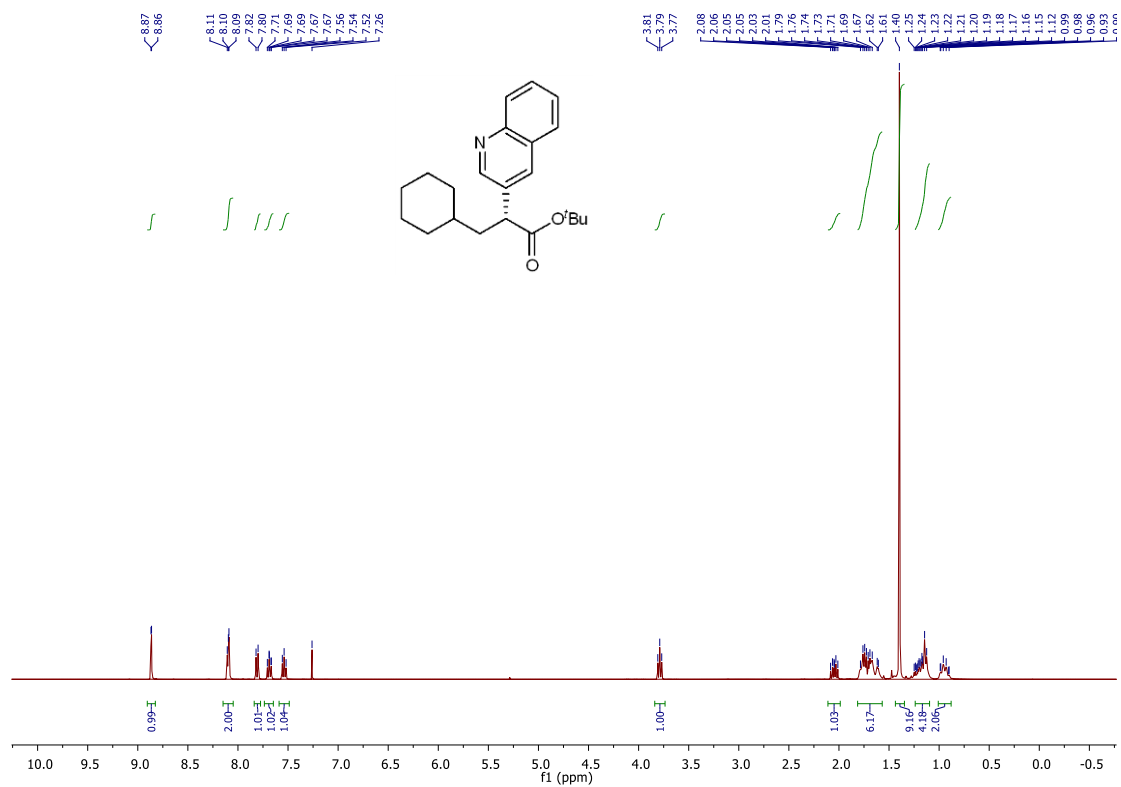

Supplementary Figure 93. <sup>1</sup>H NMR of compound 38.

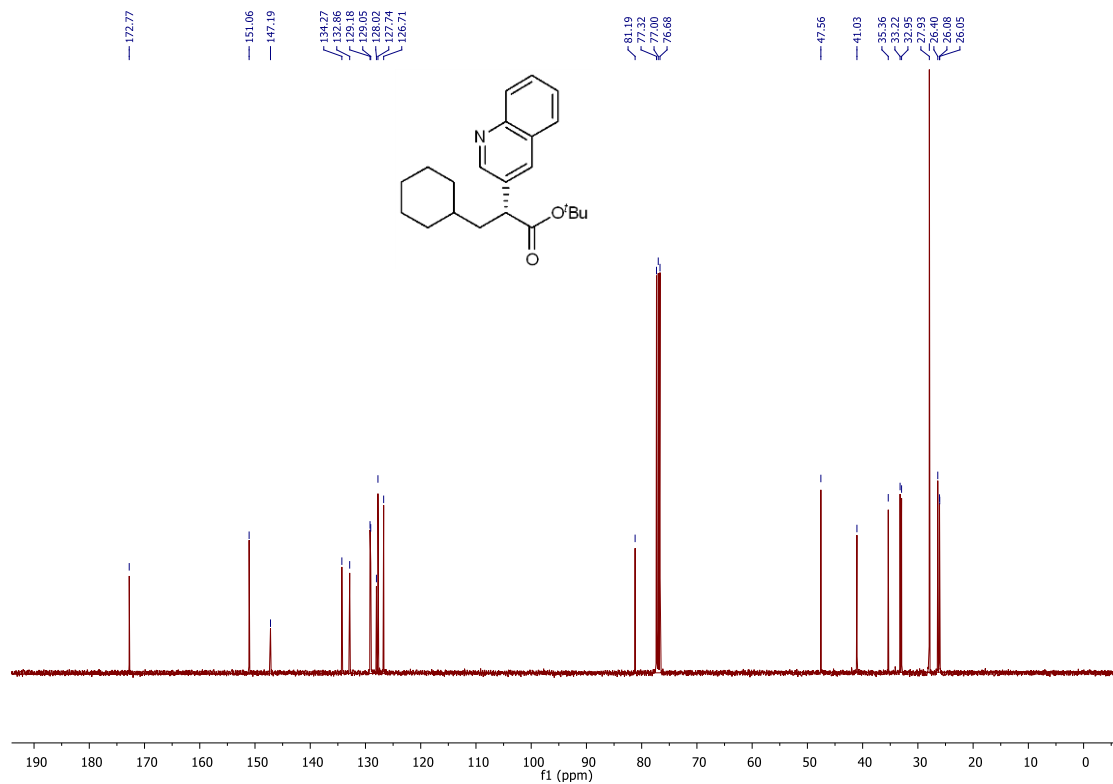

Supplementary Figure 94. <sup>13</sup>C NMR of compound 38.

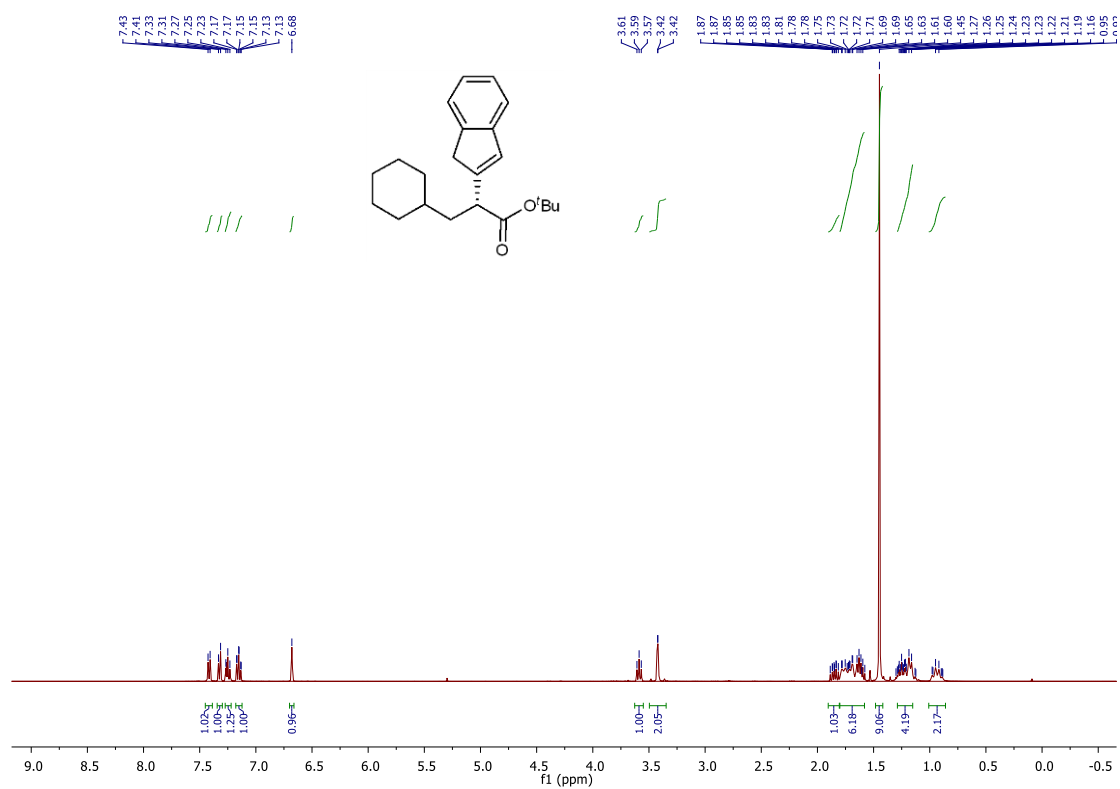

Supplementary Figure 95. <sup>1</sup>H NMR of compound 39.

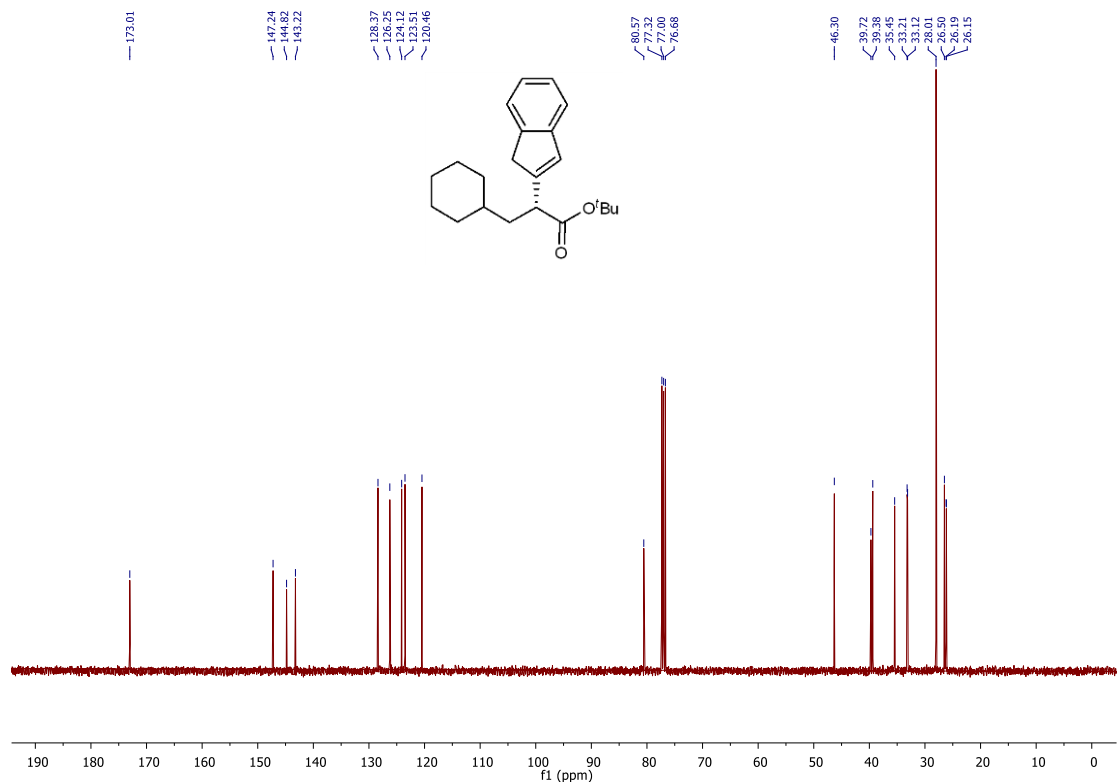

Supplementary Figure 96. <sup>13</sup>C NMR of compound 39.

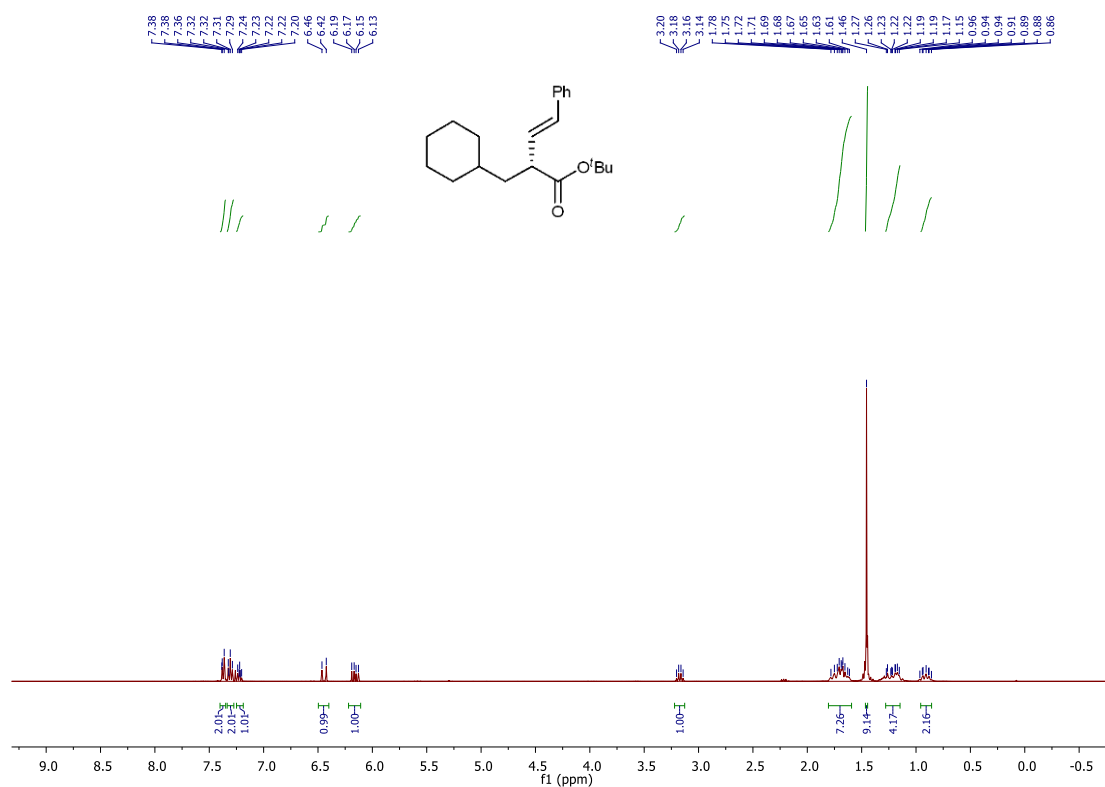

Supplementary Figure 97. <sup>1</sup>H NMR of compound 40.

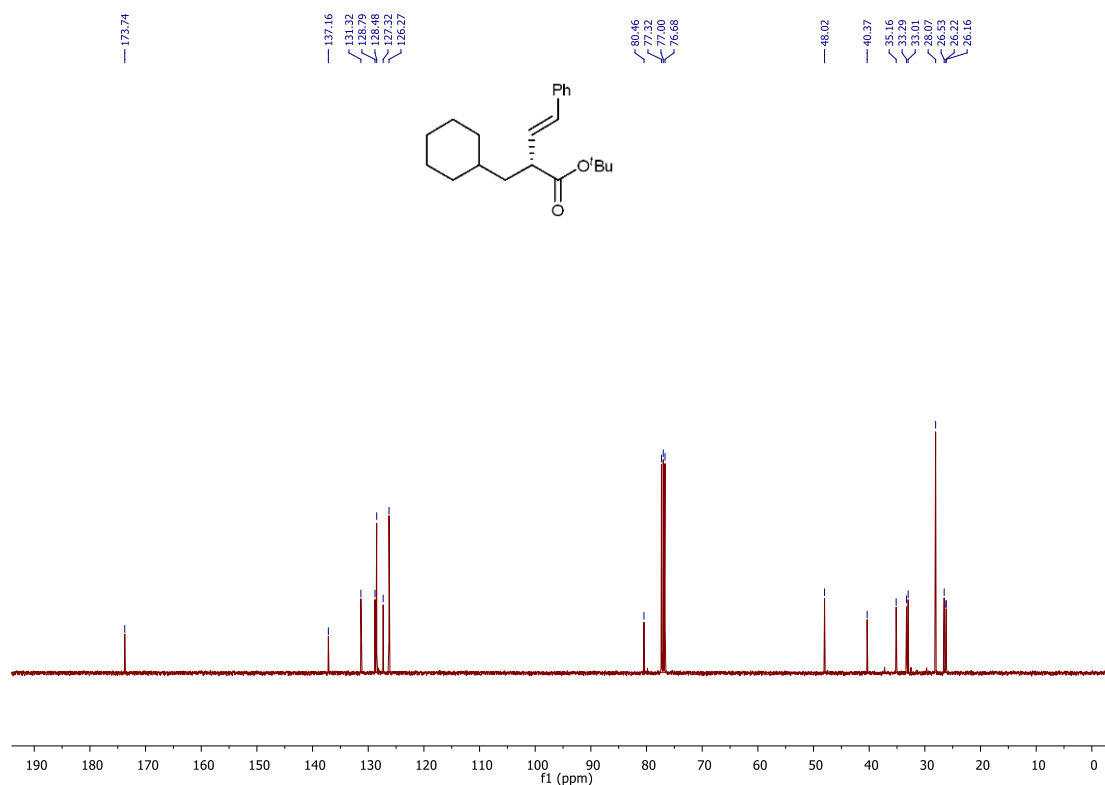

Supplementary Figure 98. <sup>13</sup>C NMR of compound 40.

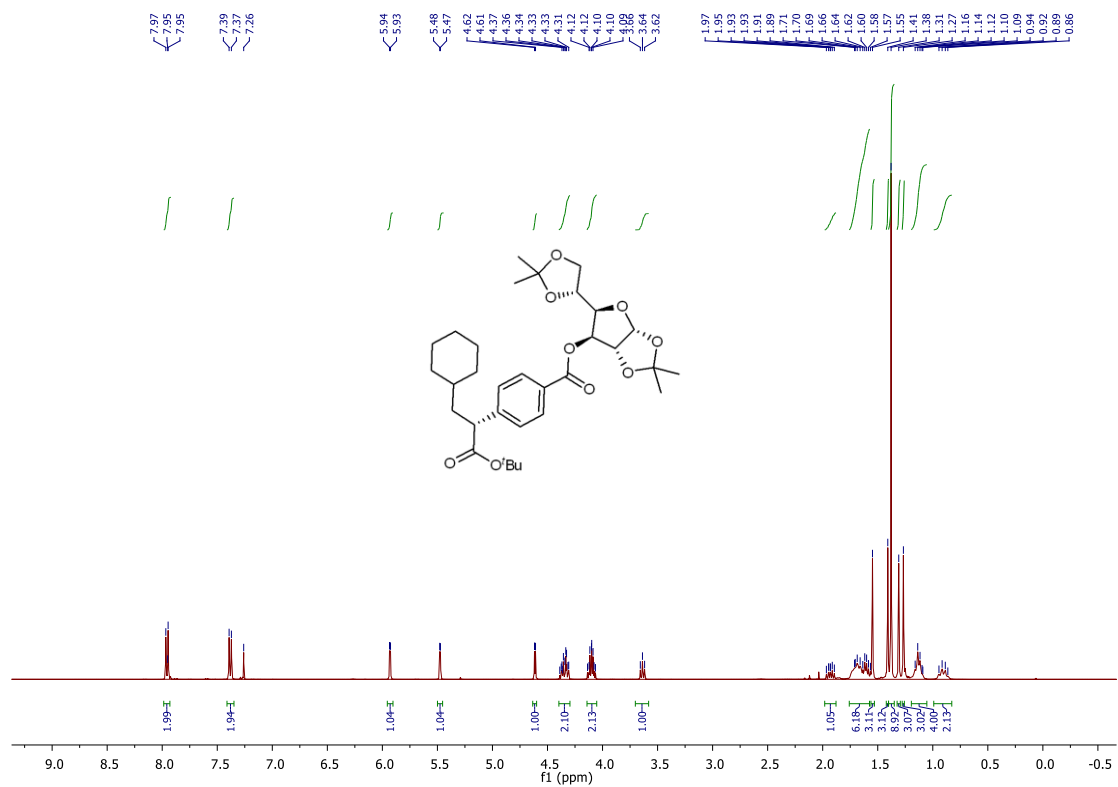

Supplementary Figure 99. <sup>1</sup>H NMR of compound 41.

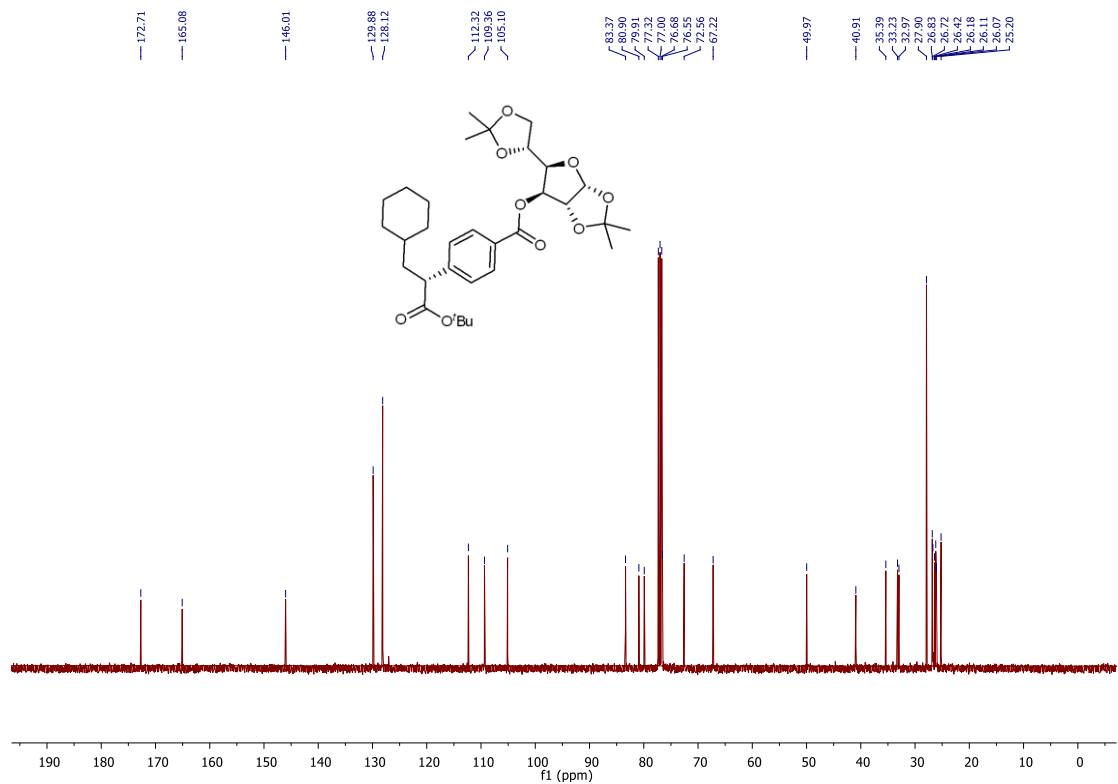

Supplementary Figure 100. <sup>13</sup>C NMR of compound 41.

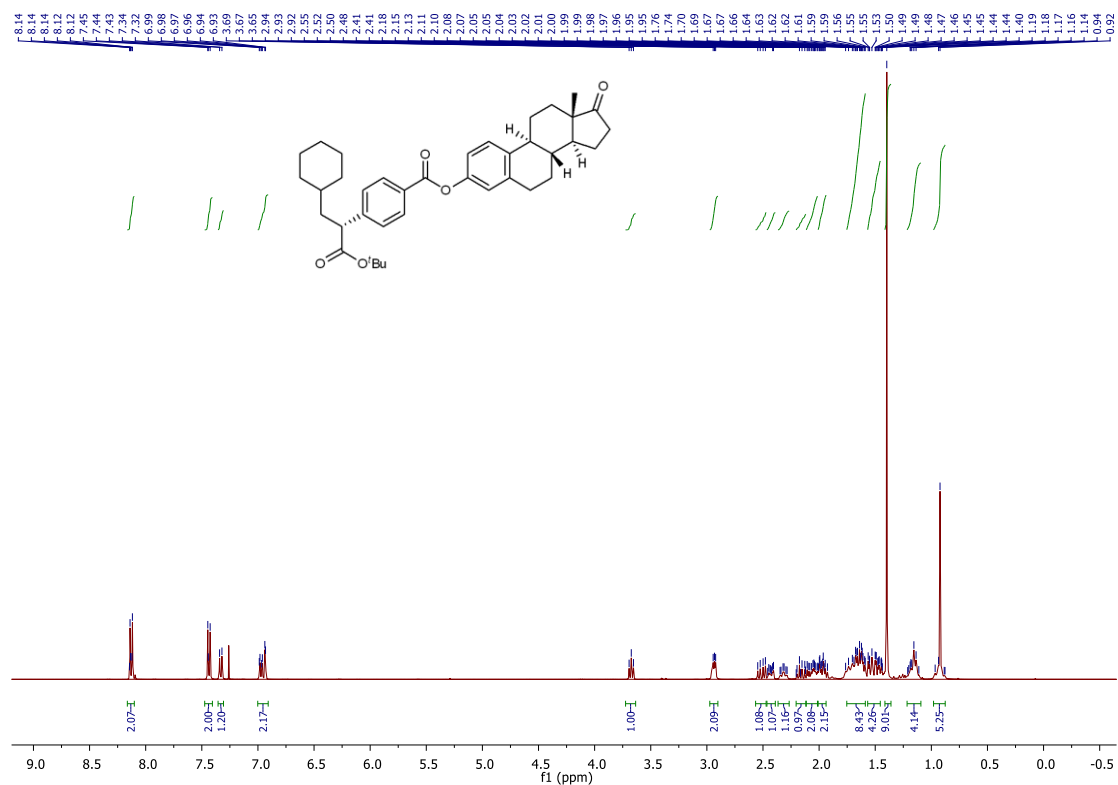

Supplementary Figure 101. <sup>1</sup>H NMR of compound 42.

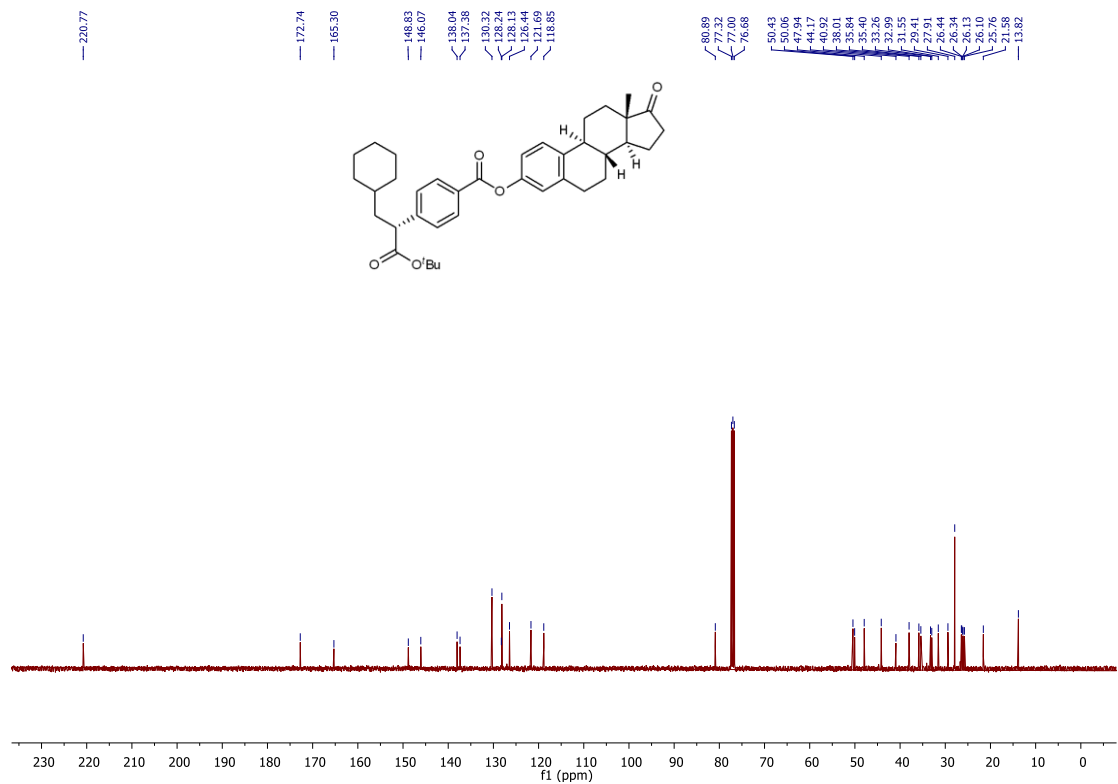

Supplementary Figure 102. <sup>13</sup>C NMR of compound 42.

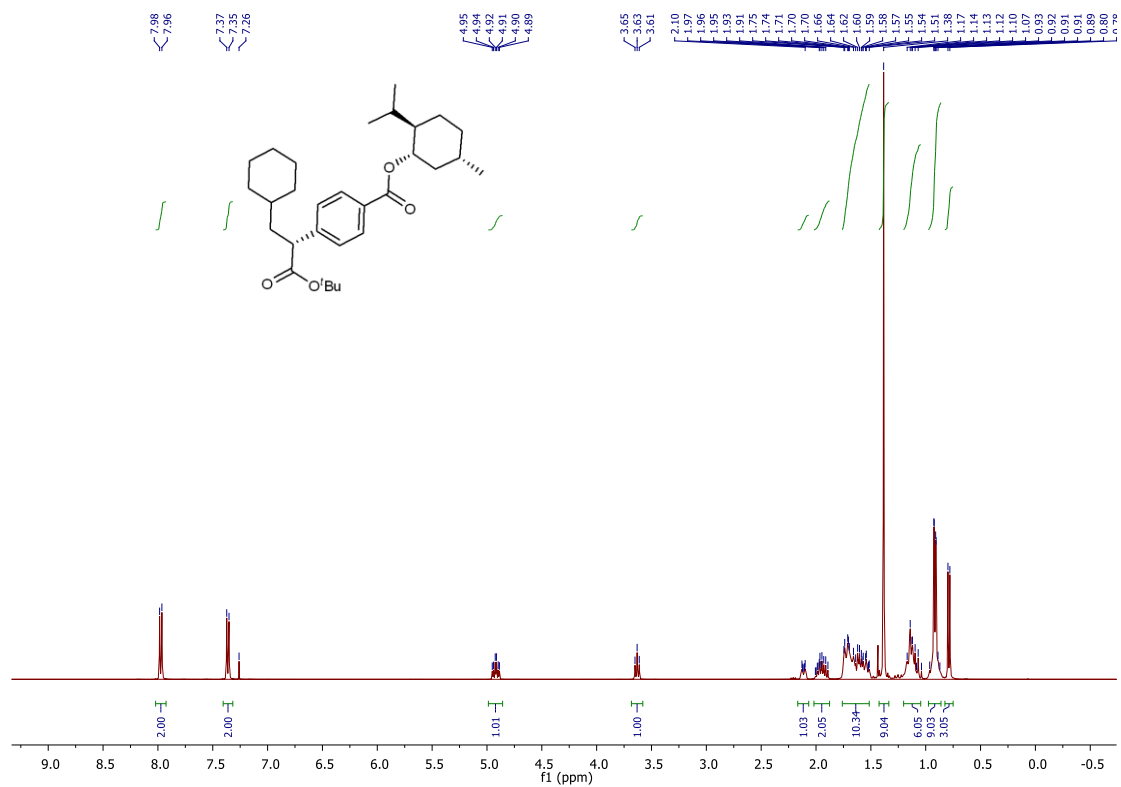

Supplementary Figure 103. <sup>1</sup>H NMR of compound 43.

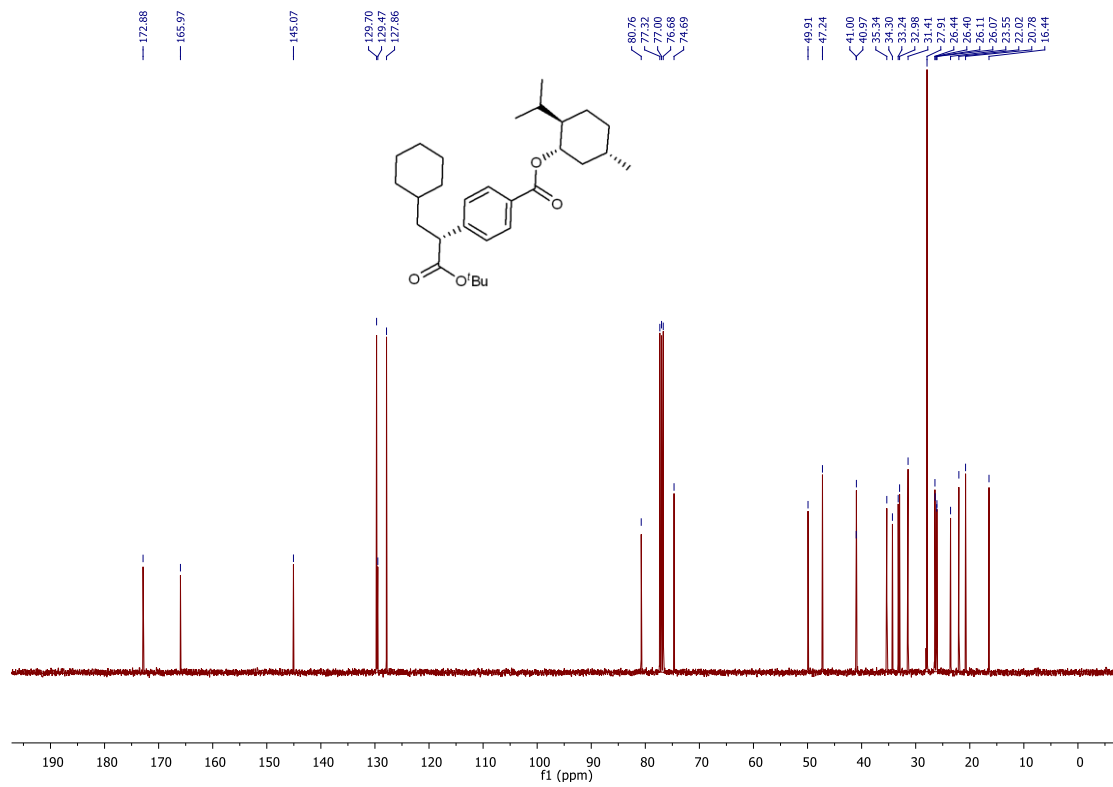

Supplementary Figure 104. <sup>13</sup>C NMR of compound 43.

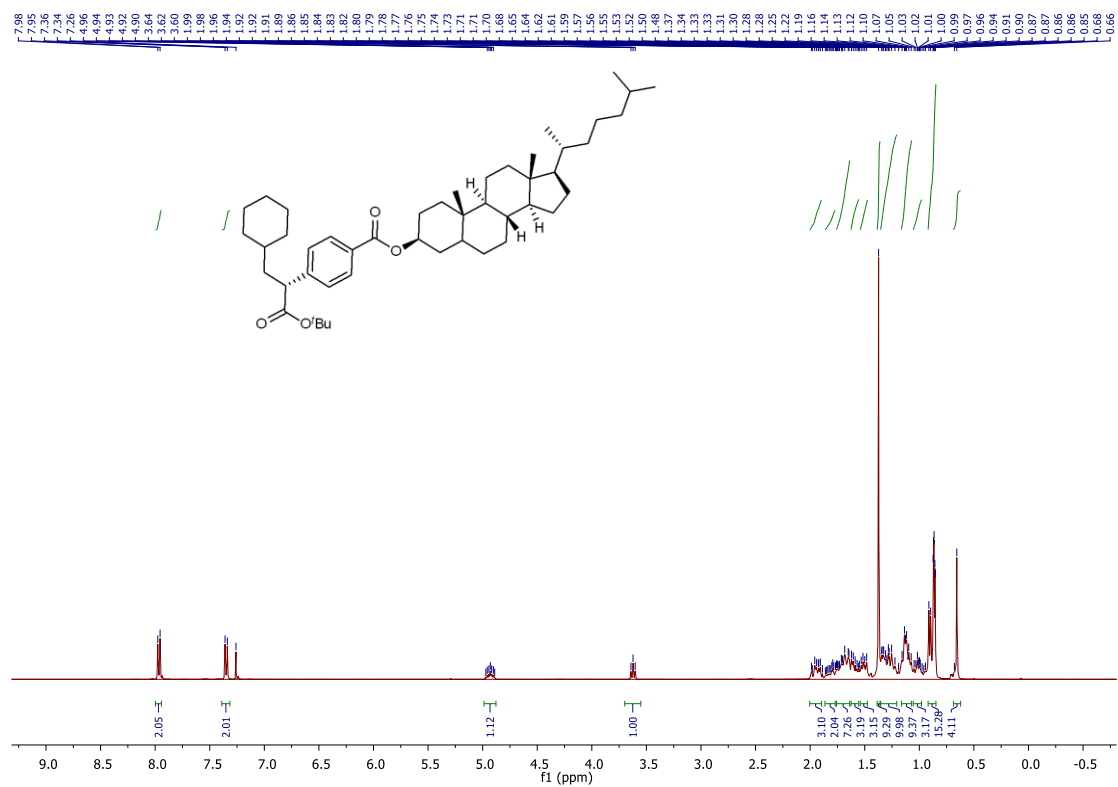

Supplementary Figure 105. <sup>1</sup>H NMR of compound 44.

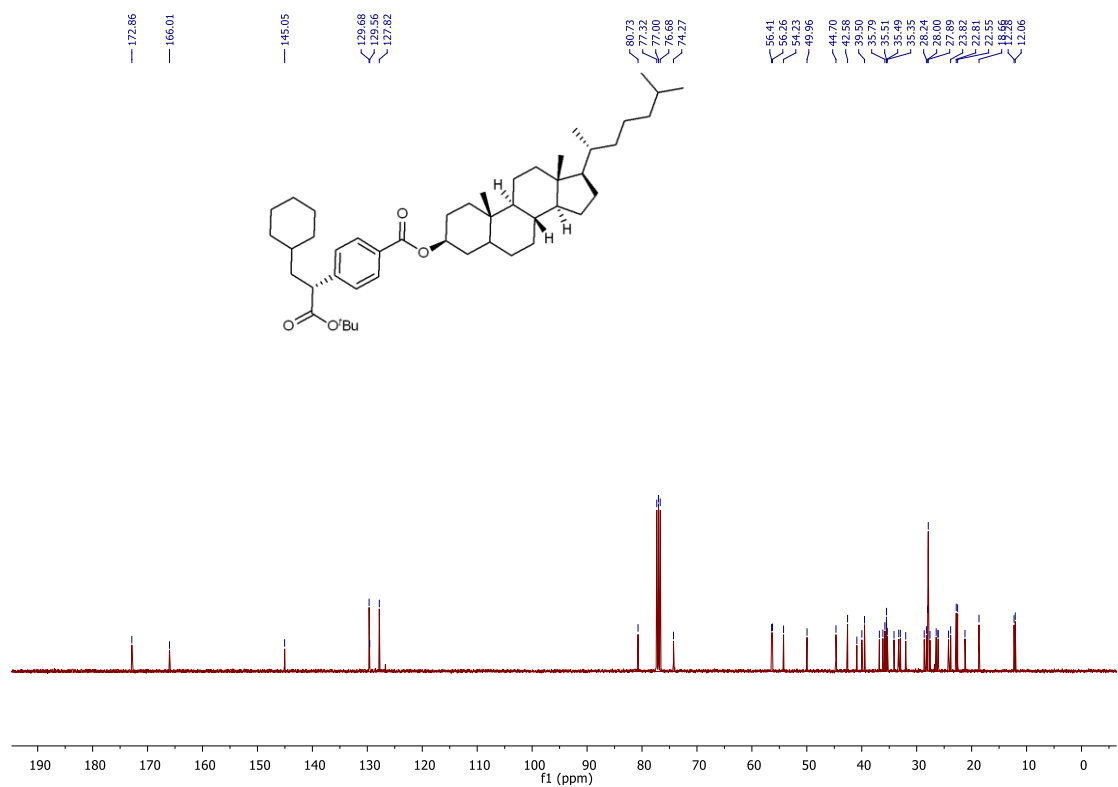

Supplementary Figure 106. <sup>13</sup>C NMR of compound 44.





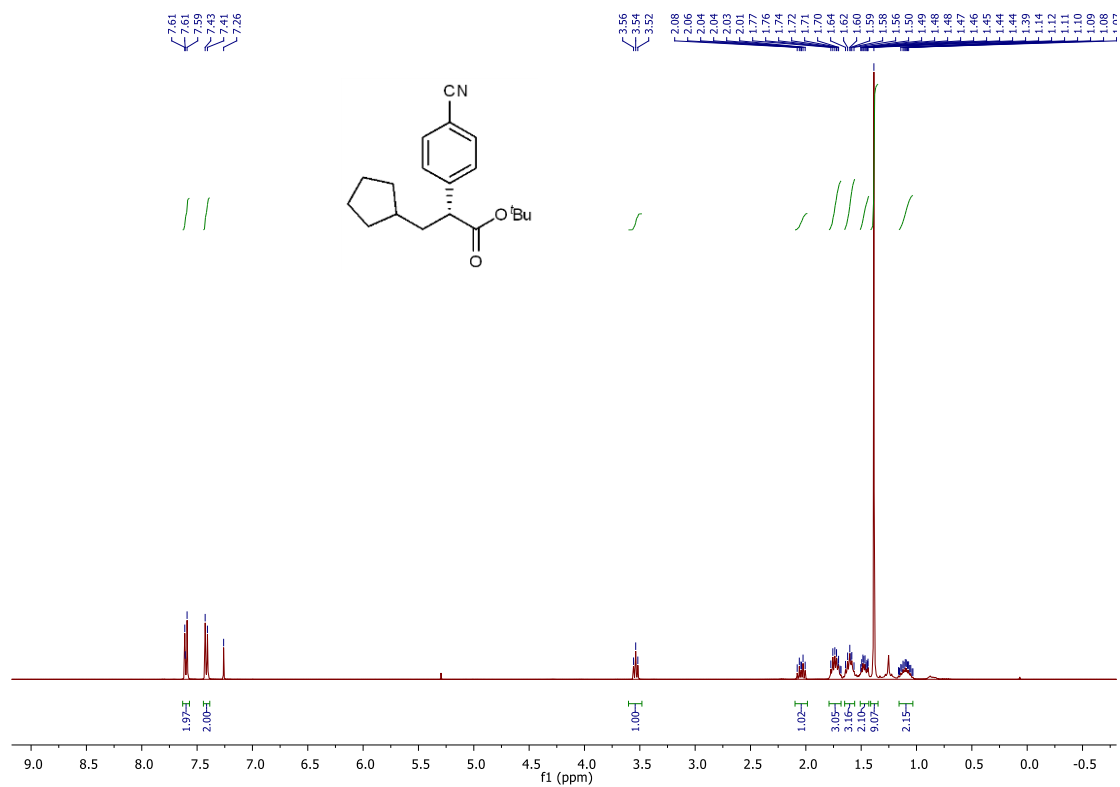

Supplementary Figure 109. <sup>1</sup>H NMR of compound 46.

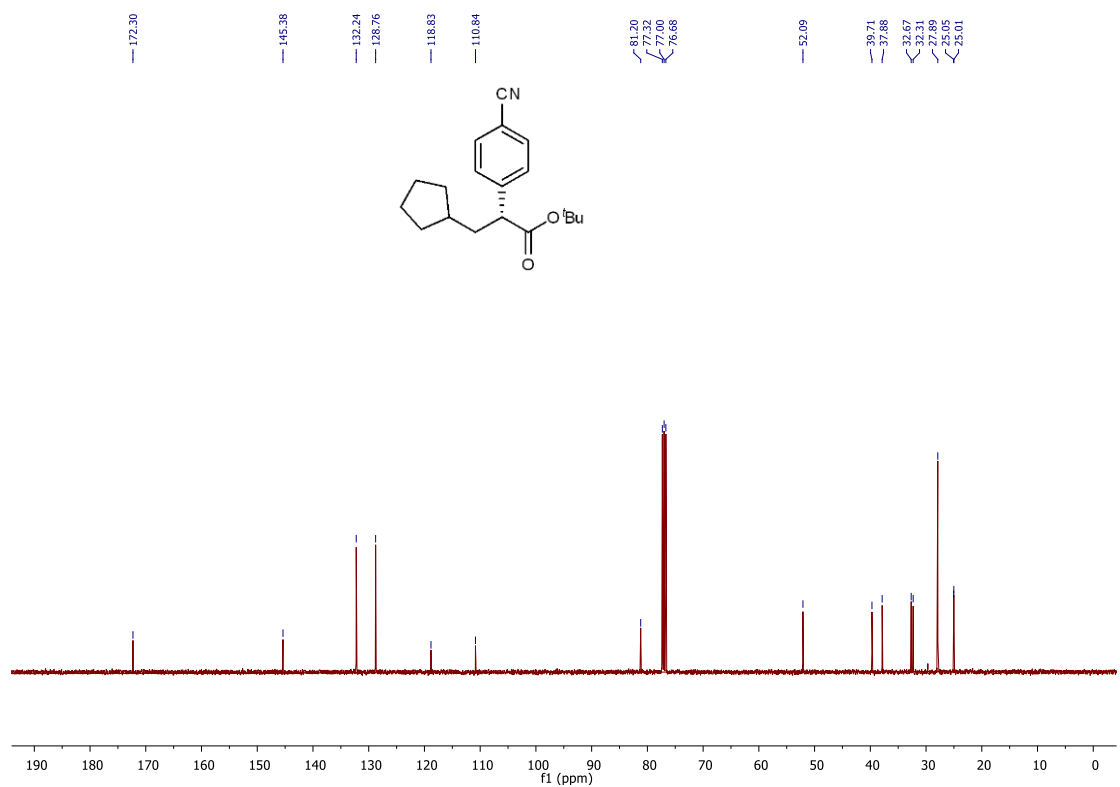

Supplementary Figure 110. <sup>13</sup>C NMR of compound 46.

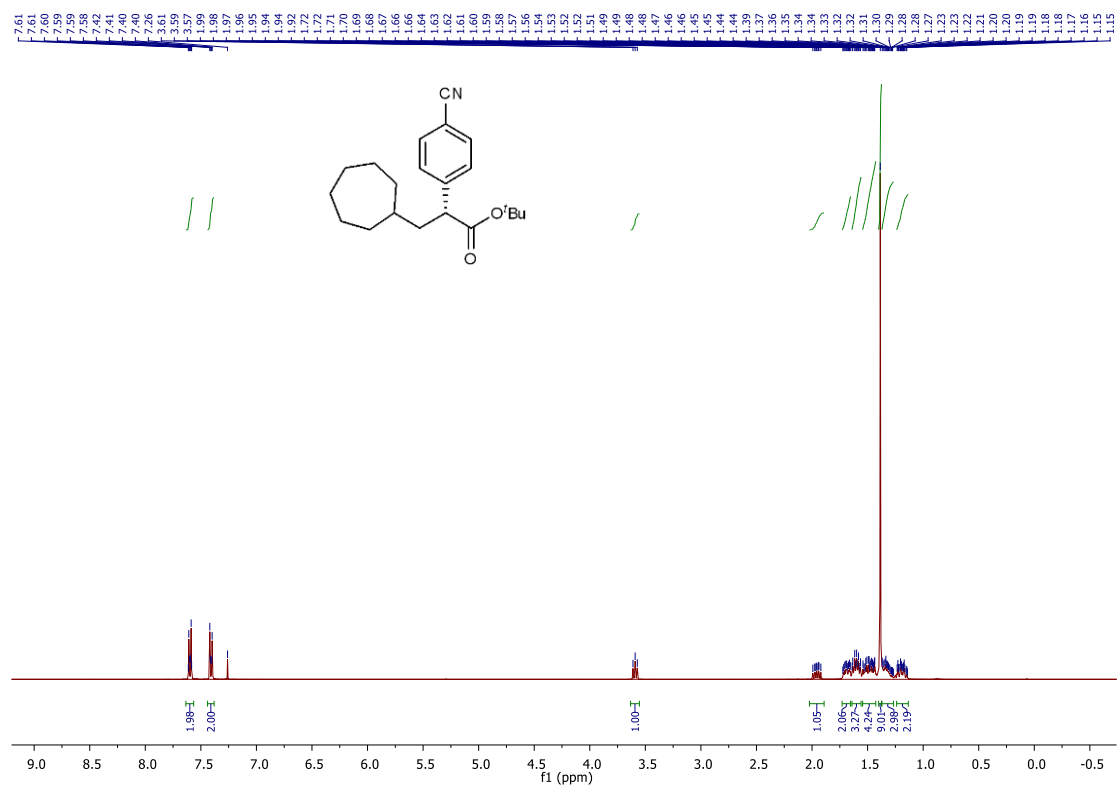

Supplementary Figure 111. <sup>1</sup>H NMR of compound 47.

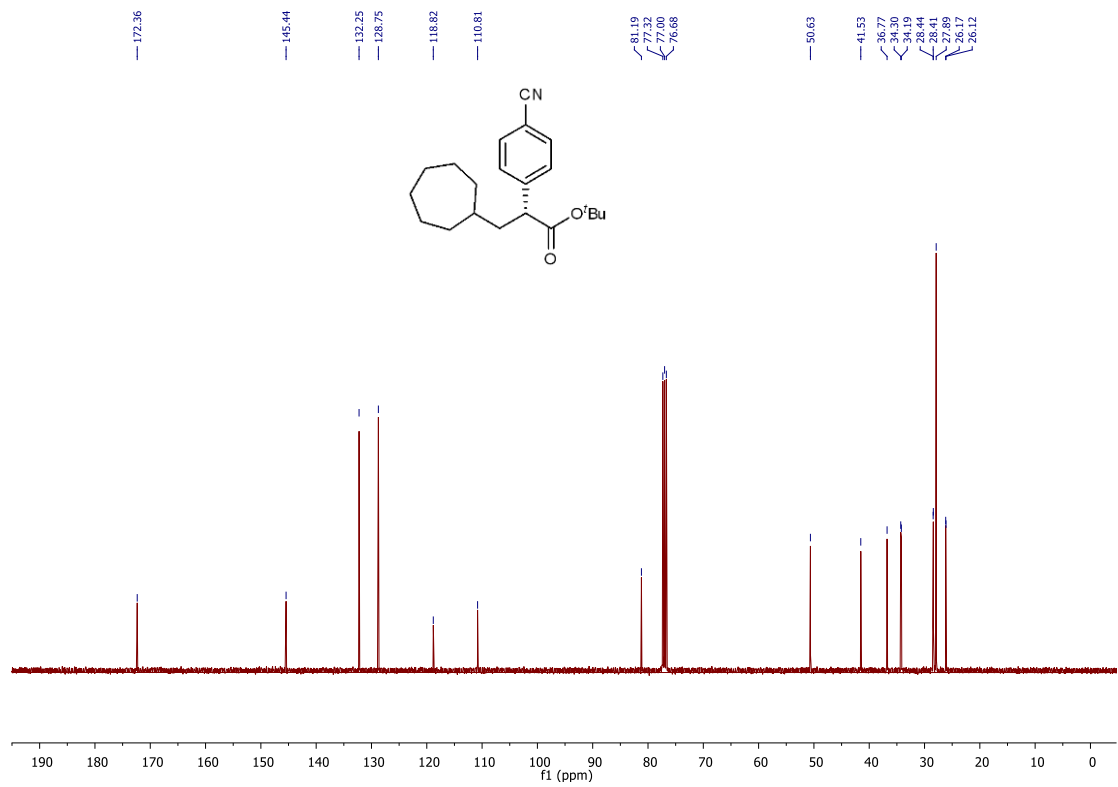

Supplementary Figure 112. <sup>13</sup>C NMR of compound 47.

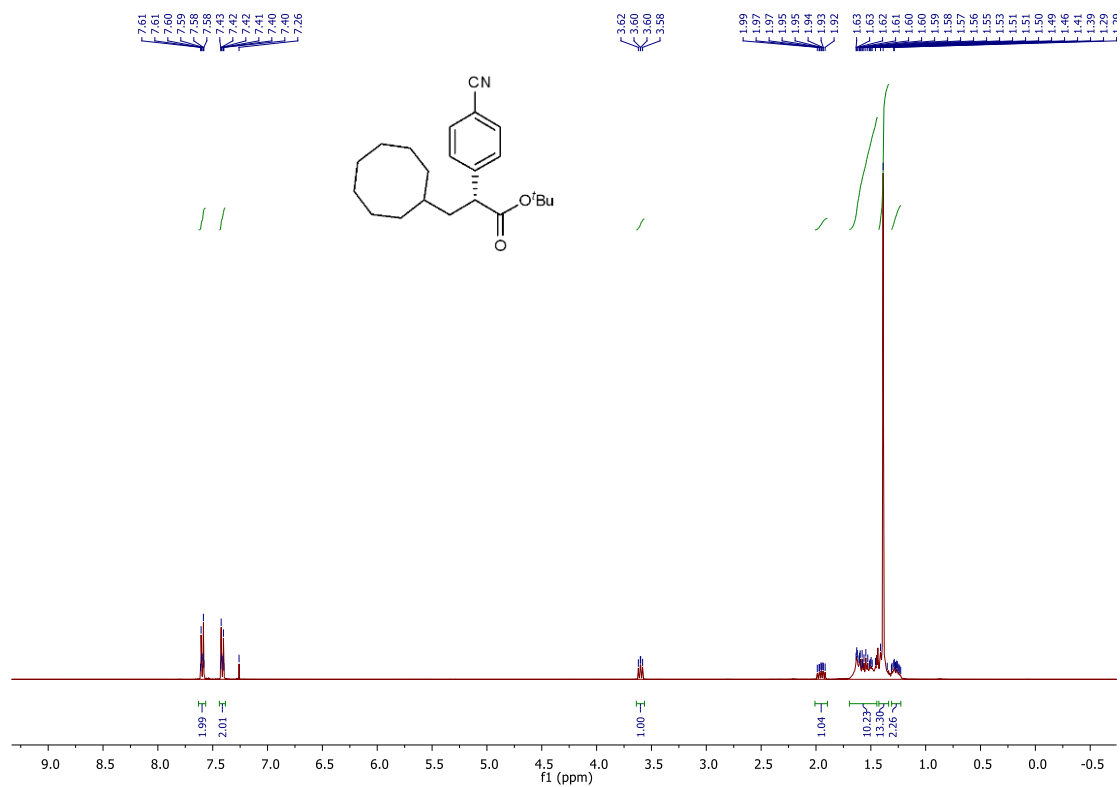

Supplementary Figure 113. <sup>1</sup>H NMR of compound 48.

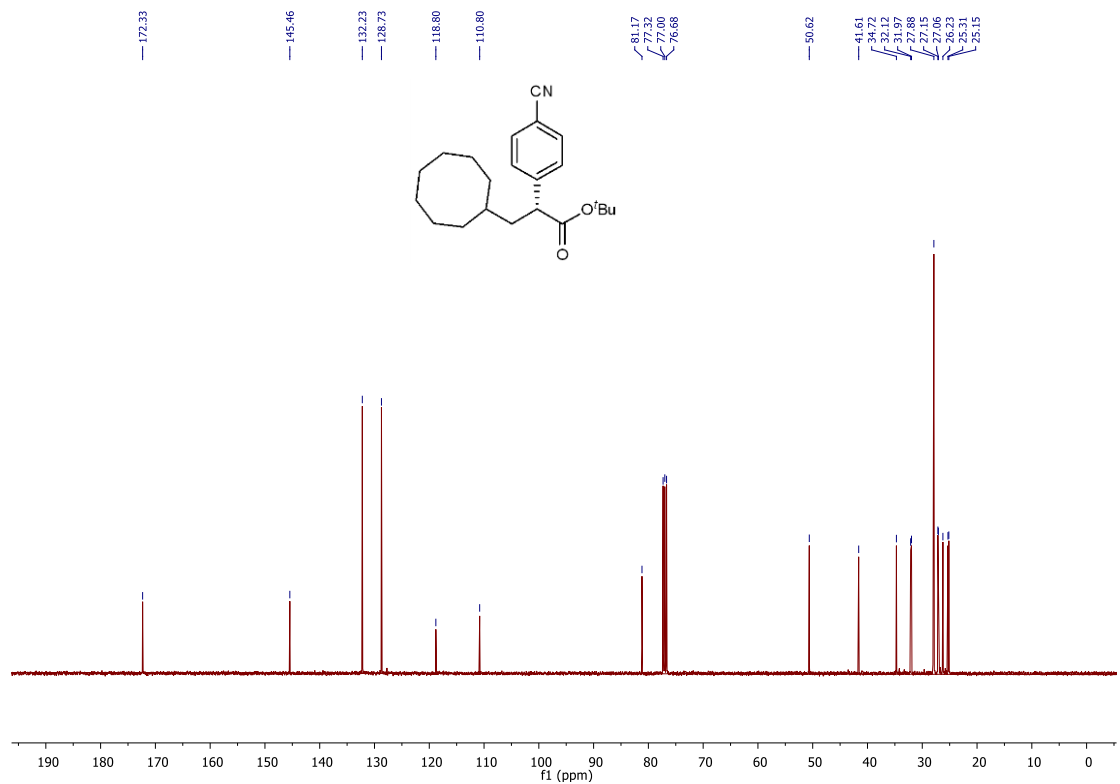

Supplementary Figure 114. <sup>13</sup>C NMR of compound 48.

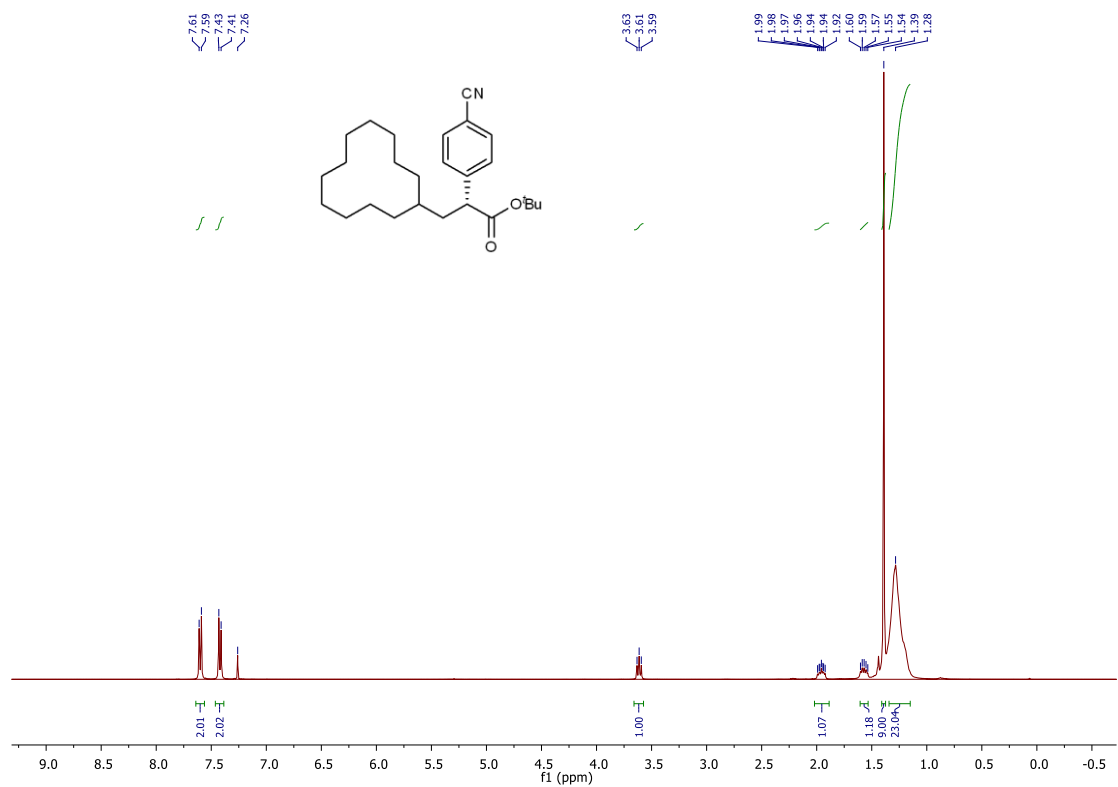

Supplementary Figure 115. <sup>1</sup>H NMR of compound 49.

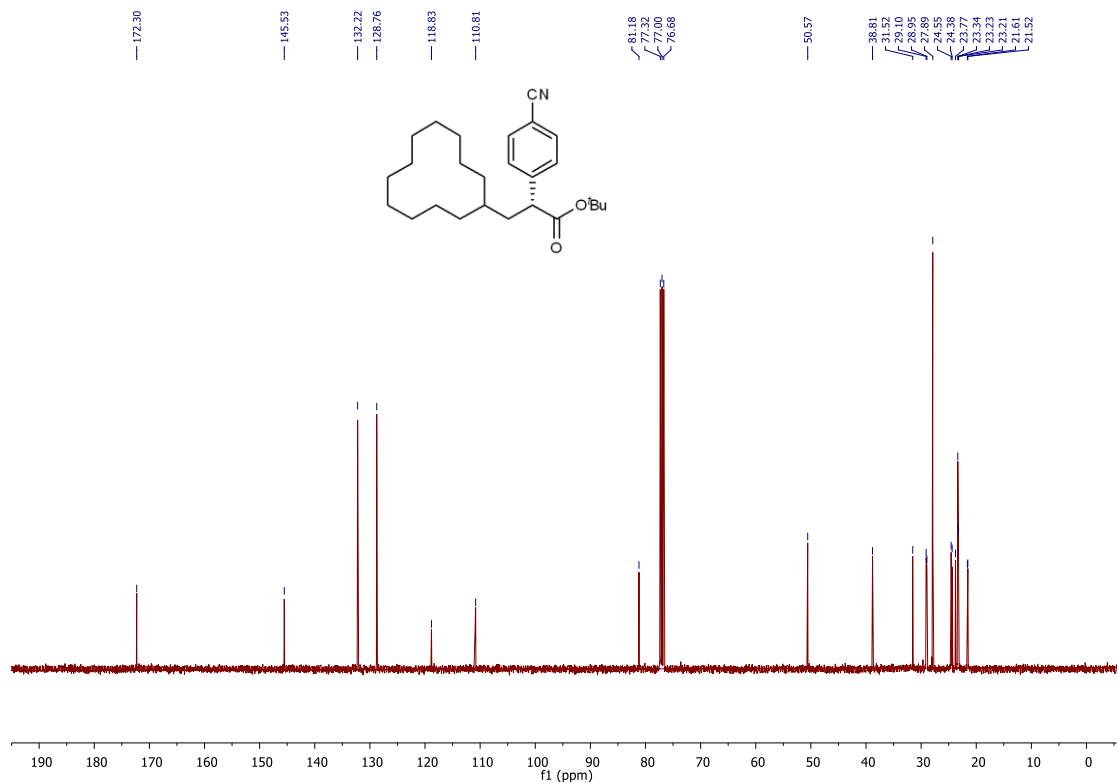

Supplementary Figure 116. <sup>13</sup>C NMR of compound 49.

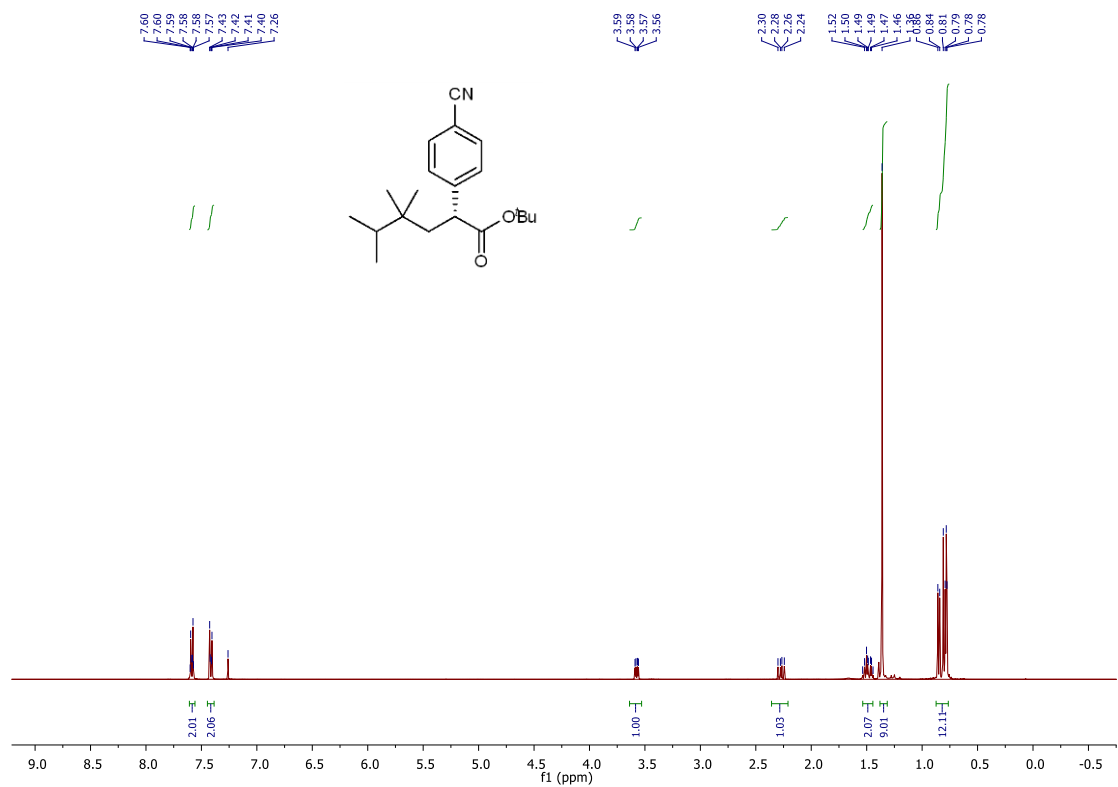

Supplementary Figure 117. <sup>1</sup>H NMR of compound 50.

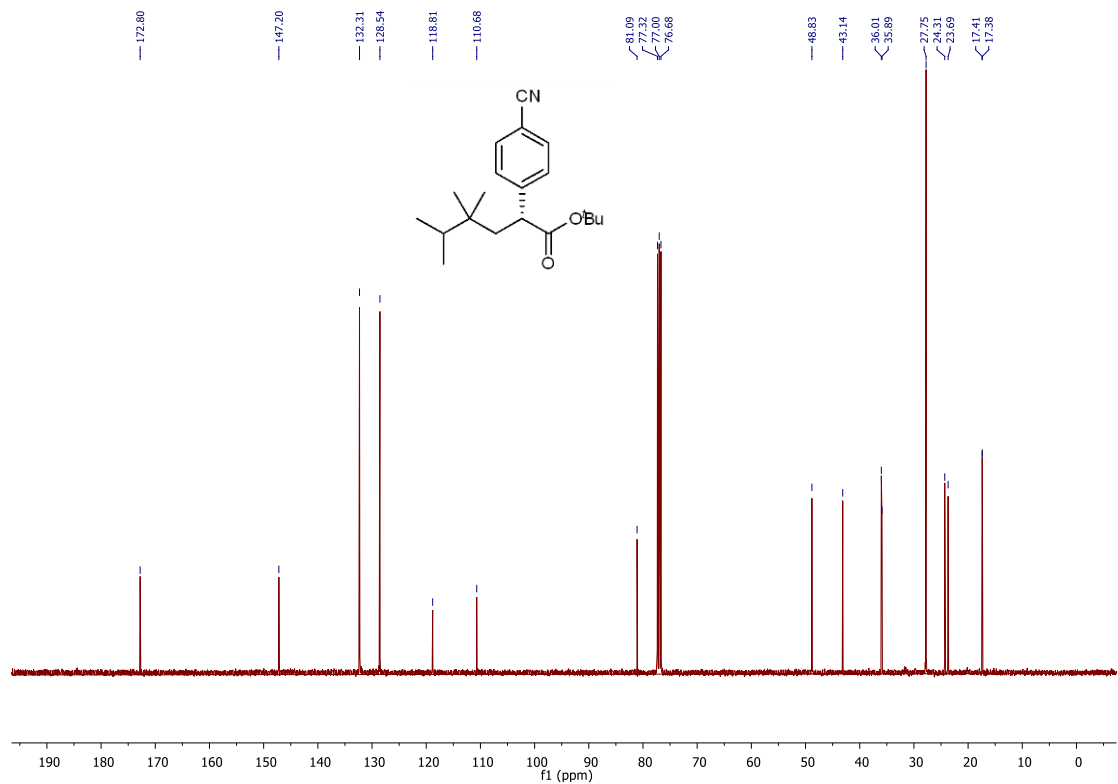

Supplementary Figure 118. <sup>13</sup>C NMR of compound 50.

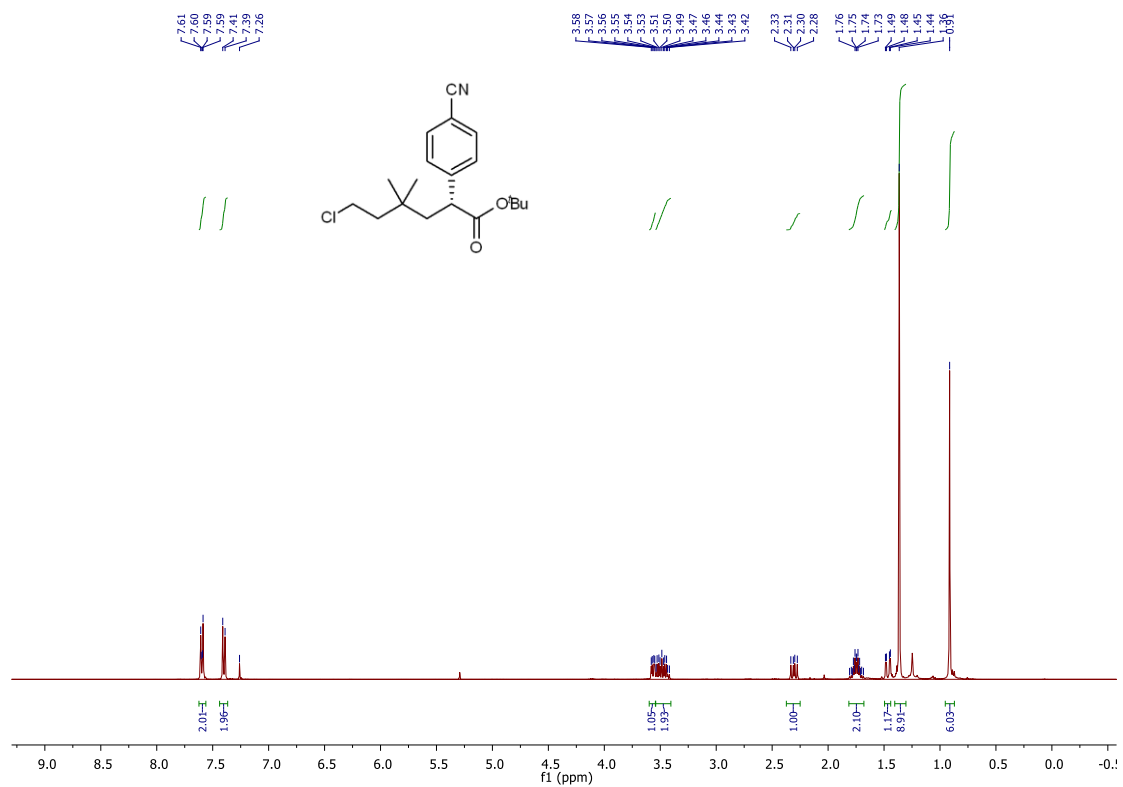

Supplementary Figure 119. <sup>1</sup>H NMR of compound 51.

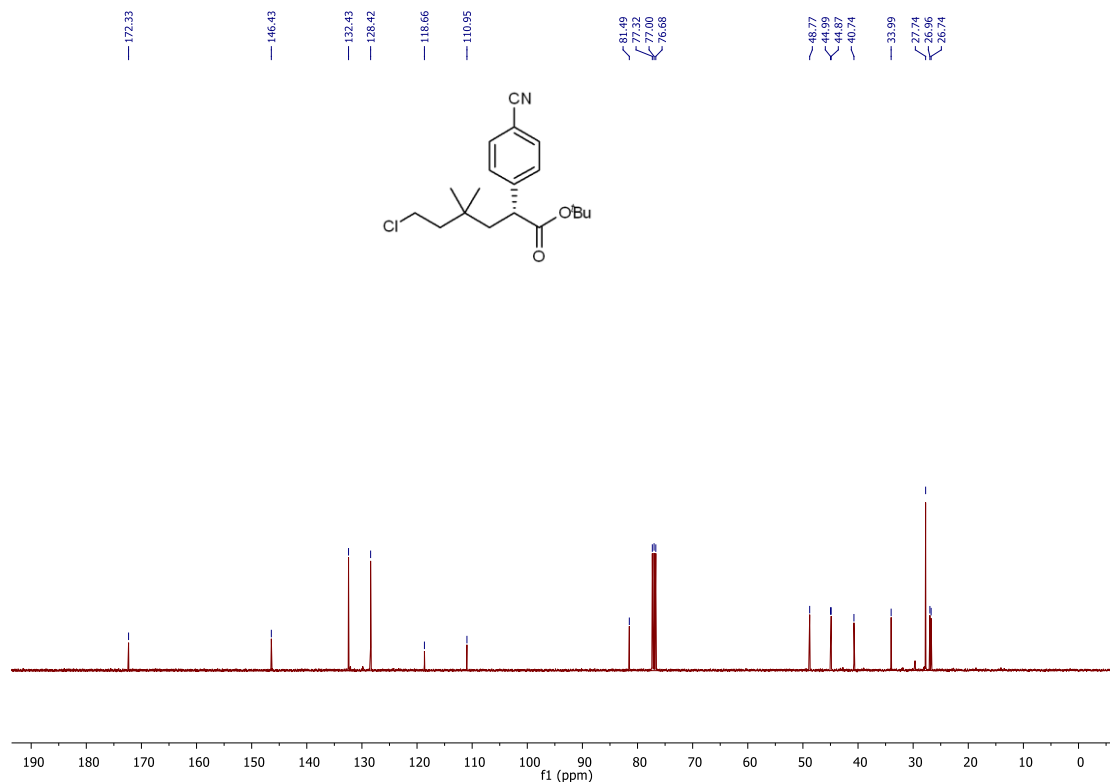

Supplementary Figure 120. <sup>13</sup>C NMR of compound 51.



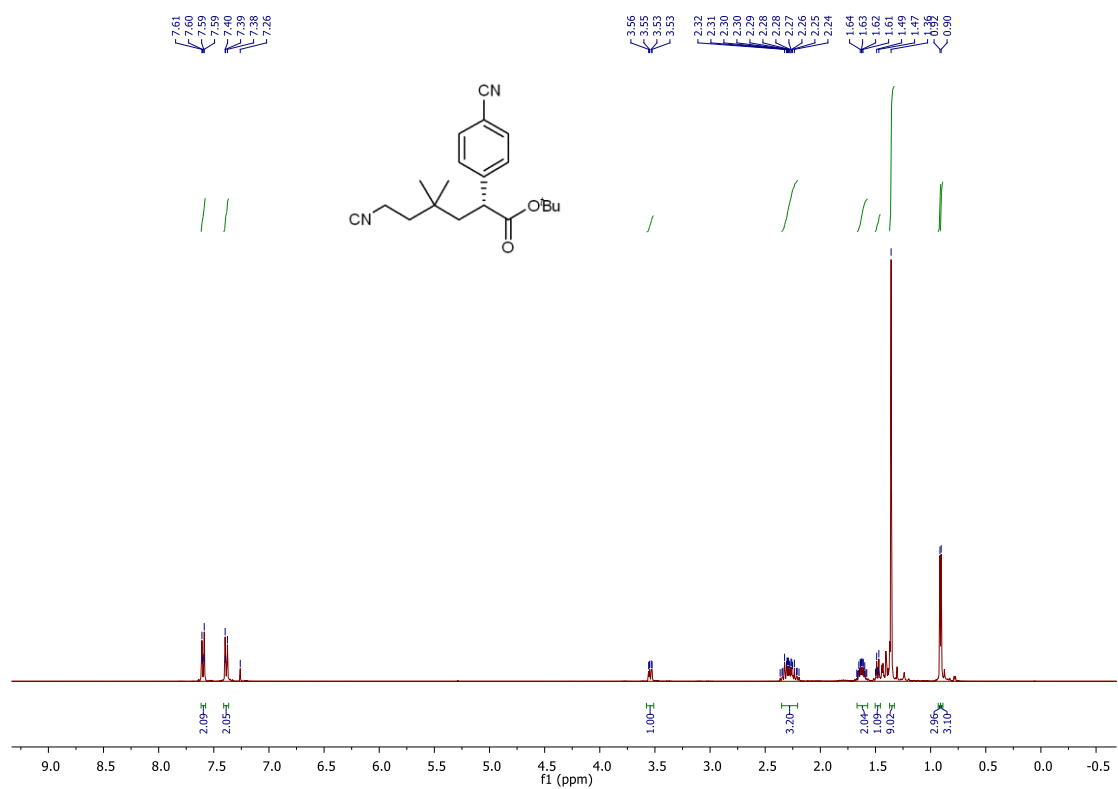

Supplementary Figure 123. <sup>1</sup>H NMR of compound 53.

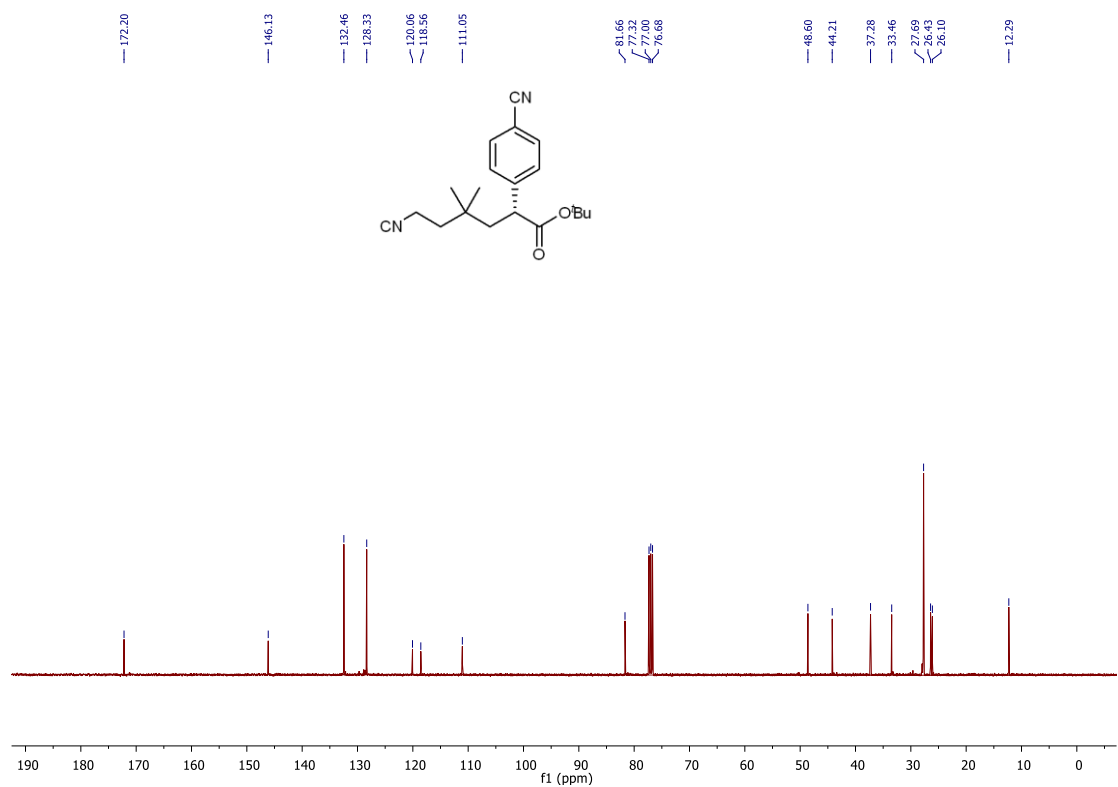

Supplementary Figure 124. <sup>13</sup>C NMR of compound 53.



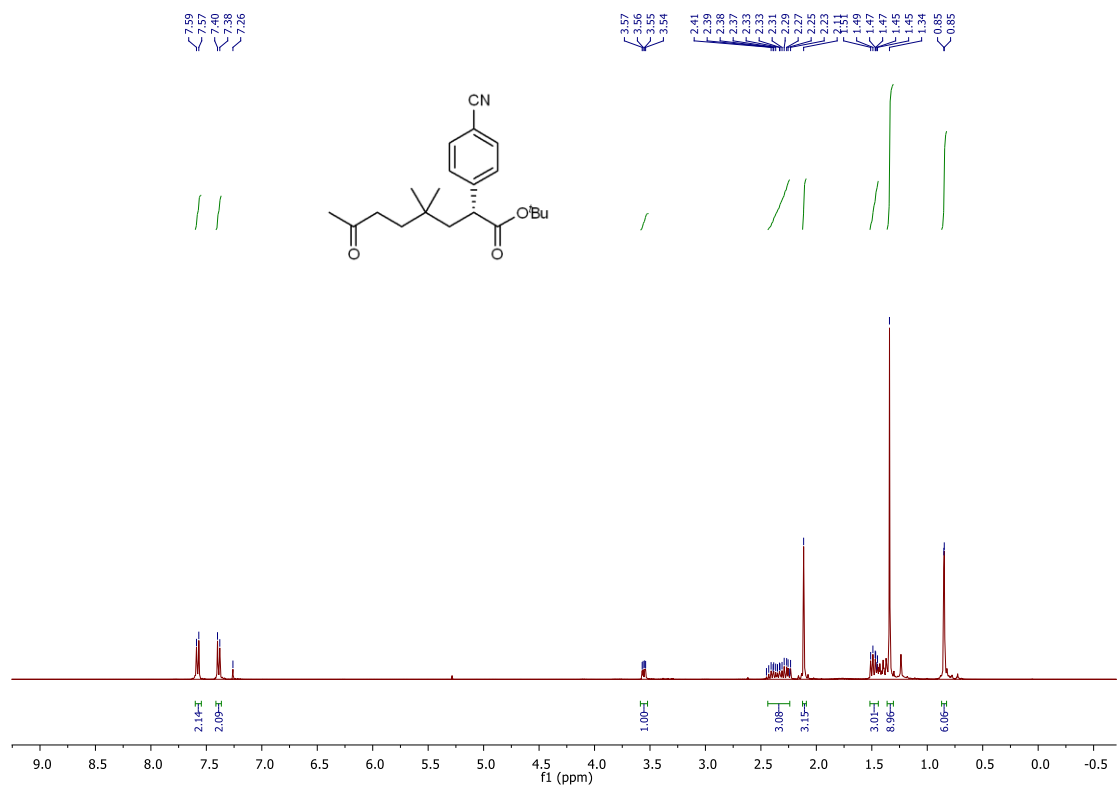

Supplementary Figure 125. <sup>1</sup>H NMR of compound 54.

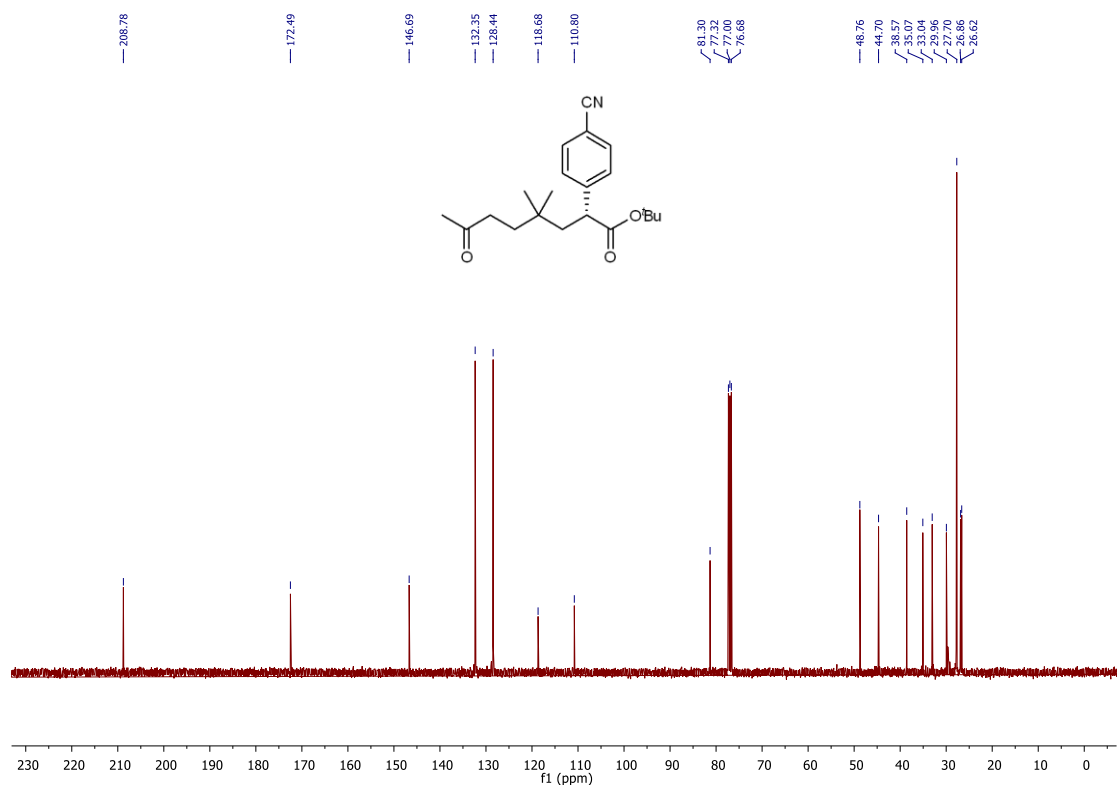

Supplementary Figure 126. <sup>13</sup>C NMR of compound 54.

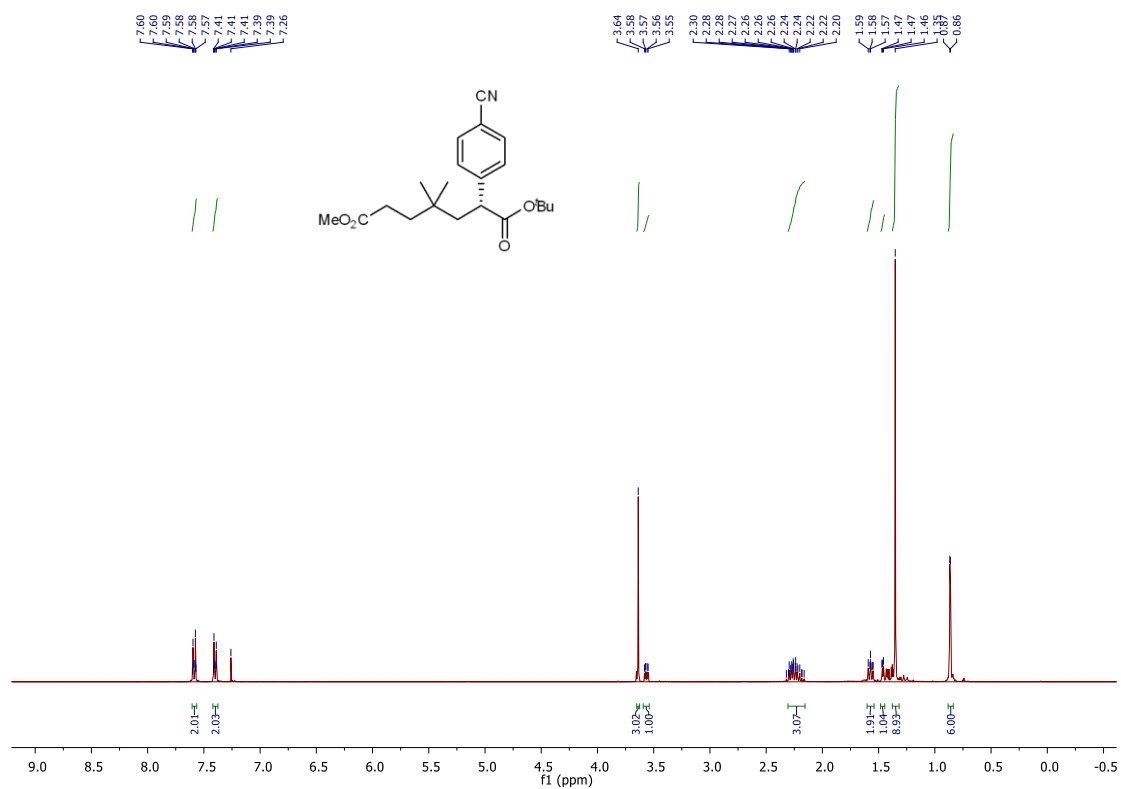

Supplementary Figure 127. <sup>1</sup>H NMR of compound 55.

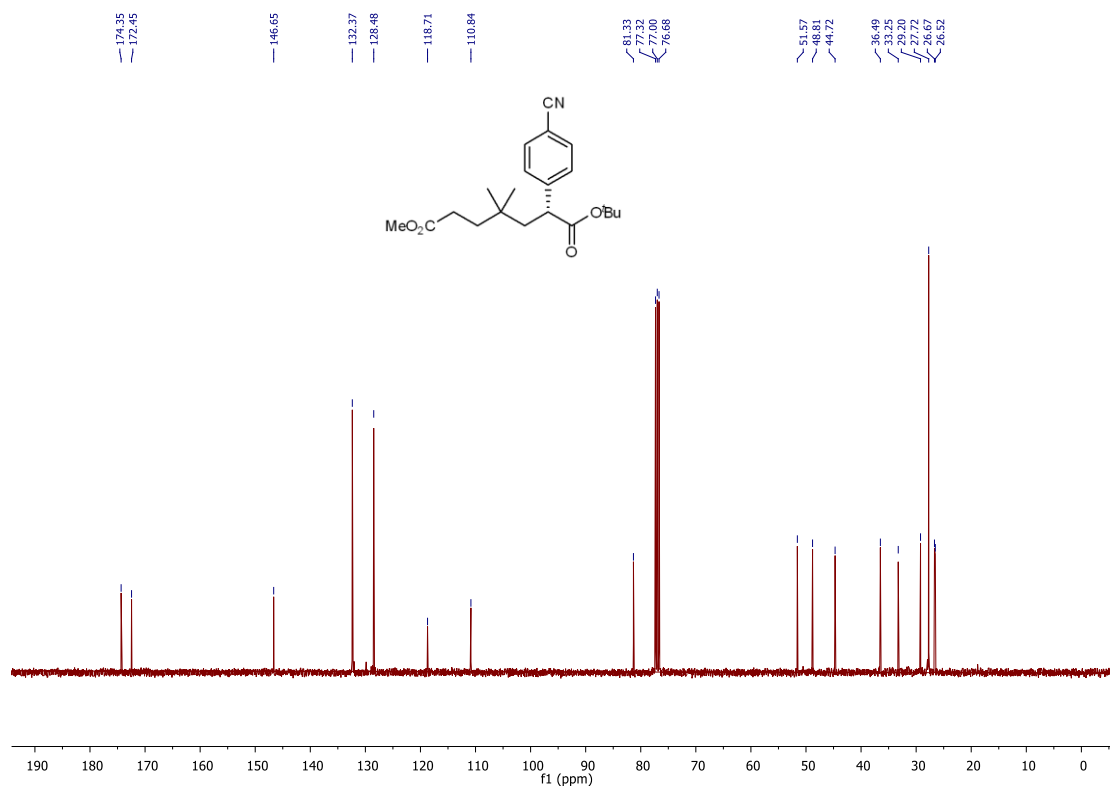

Supplementary Figure 128. <sup>13</sup>C NMR of compound 55.

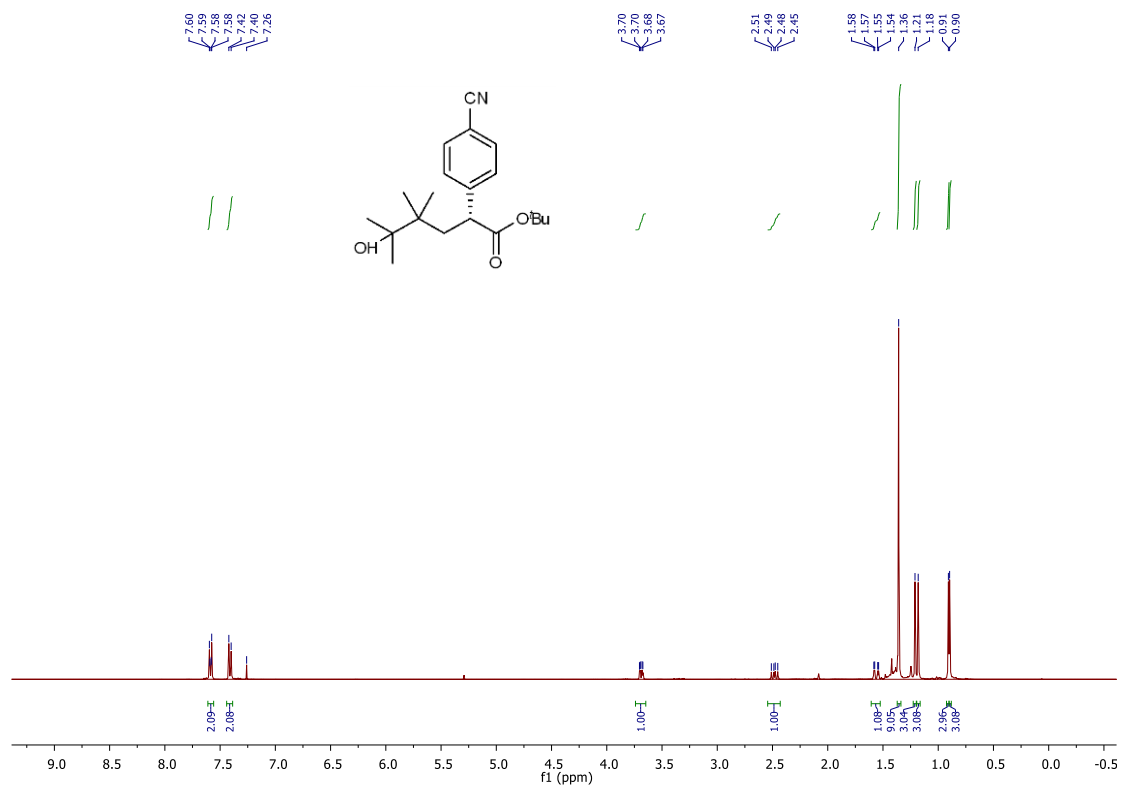

**Supplementary Figure 129.** <sup>1</sup>H NMR of compound **56**.

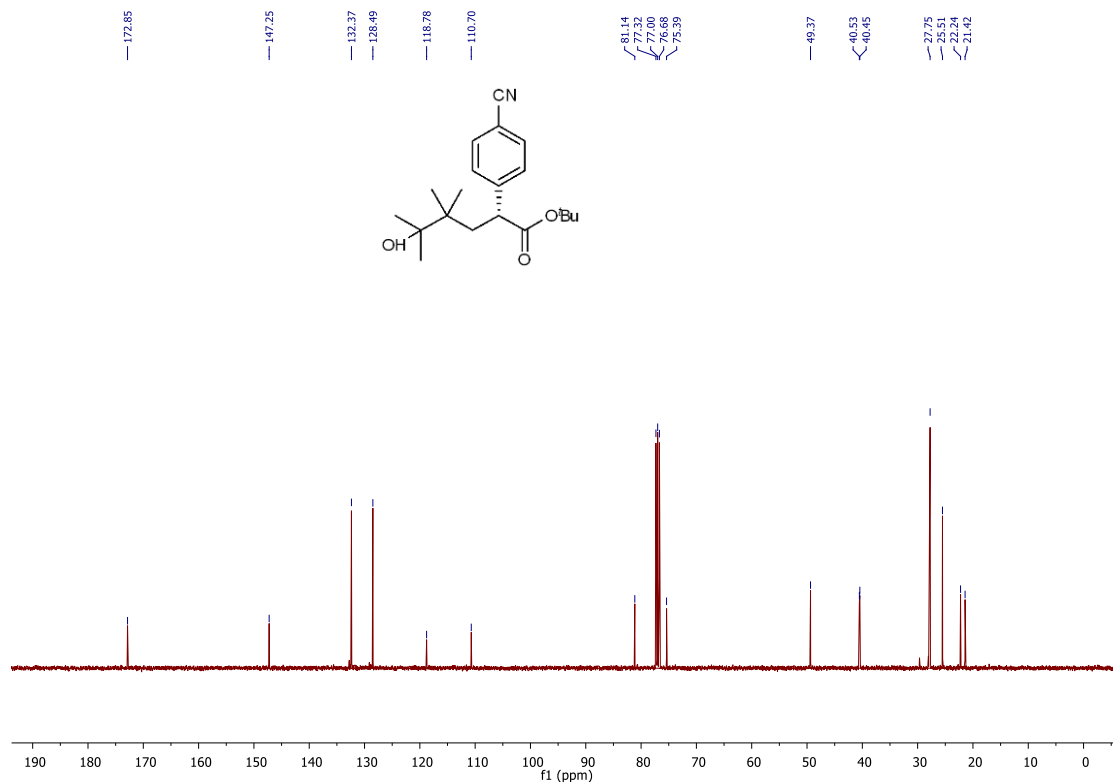

**Supplementary Figure 130.** <sup>13</sup>C NMR of compound **56**.

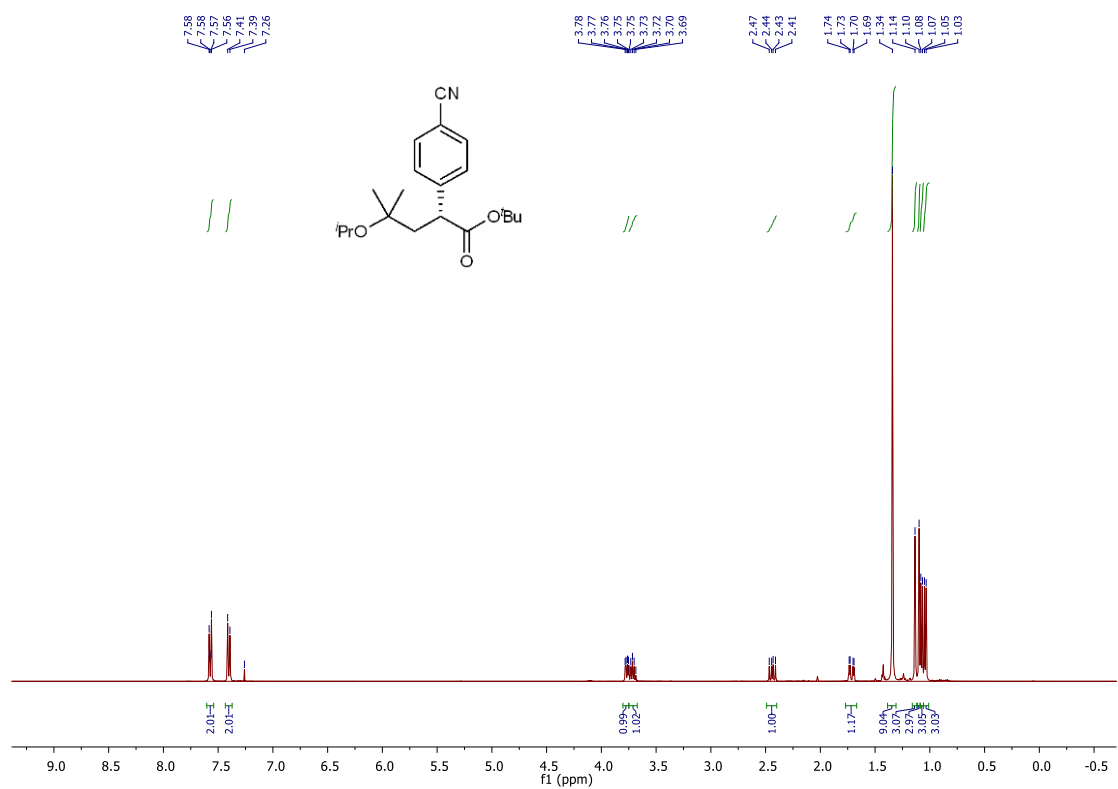

Supplementary Figure 131. <sup>1</sup>H NMR of compound 57.

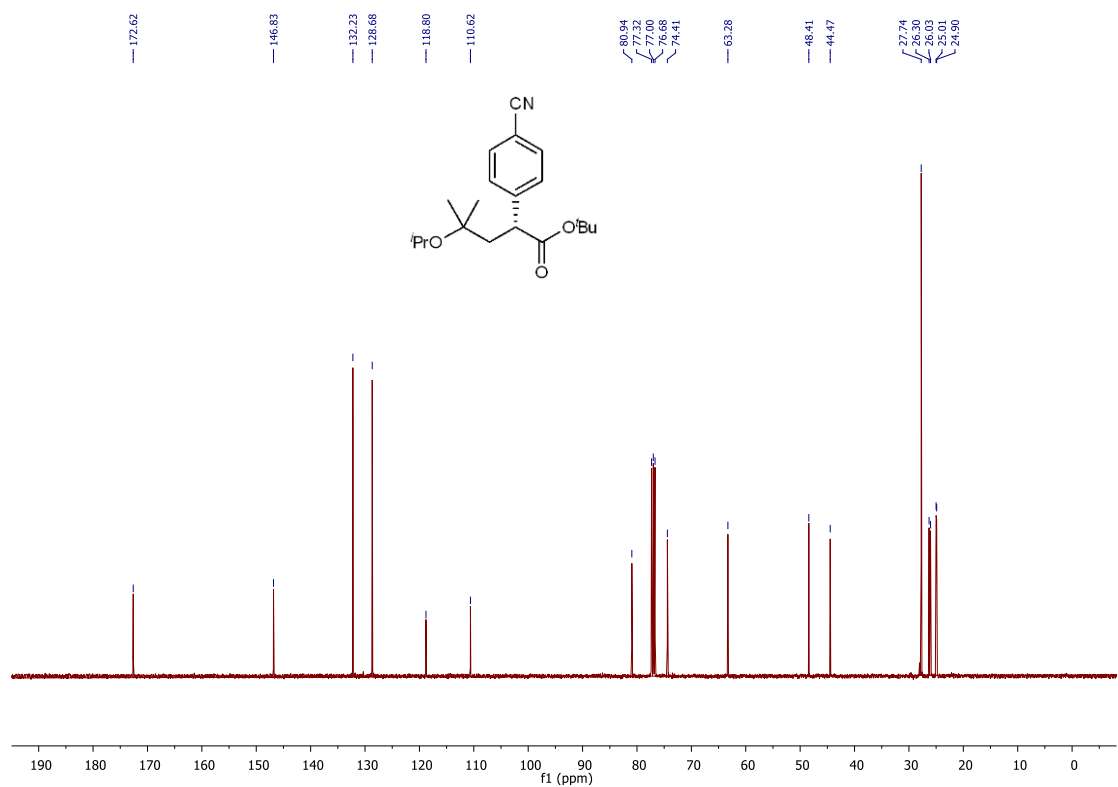

Supplementary Figure 132. <sup>13</sup>C NMR of compound 57.

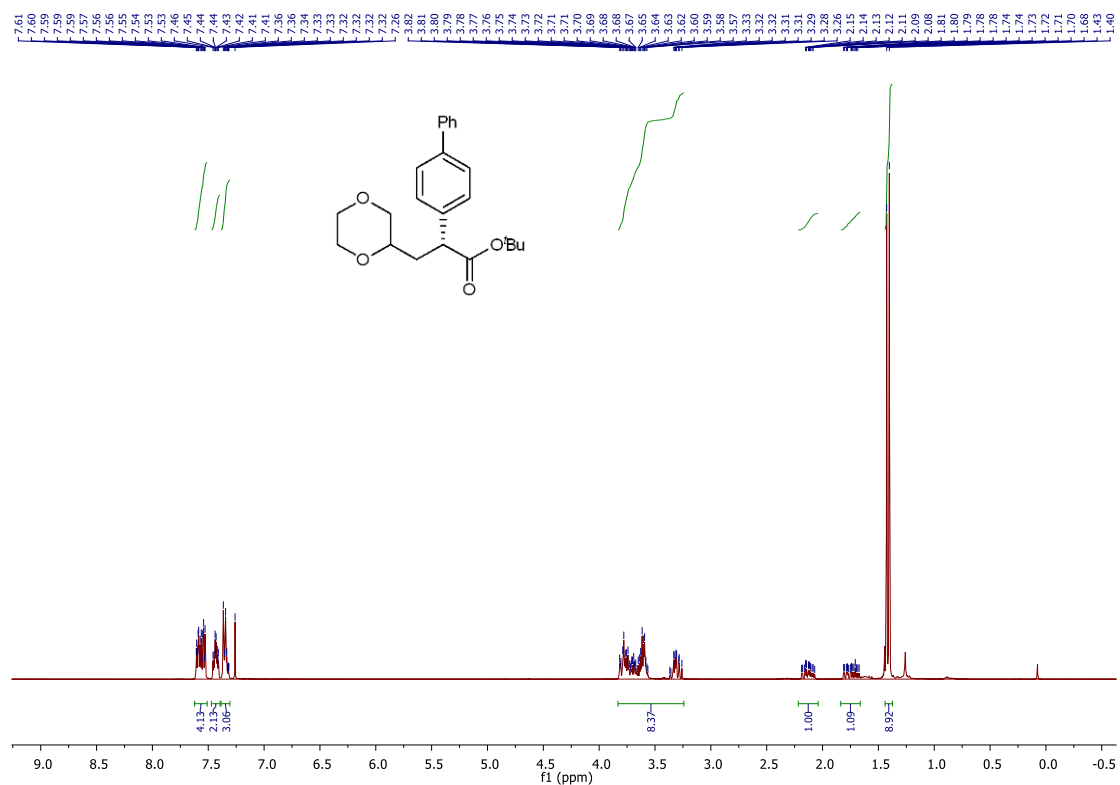

Supplementary Figure 133.  $^1\text{H}$  NMR of compound **58**.

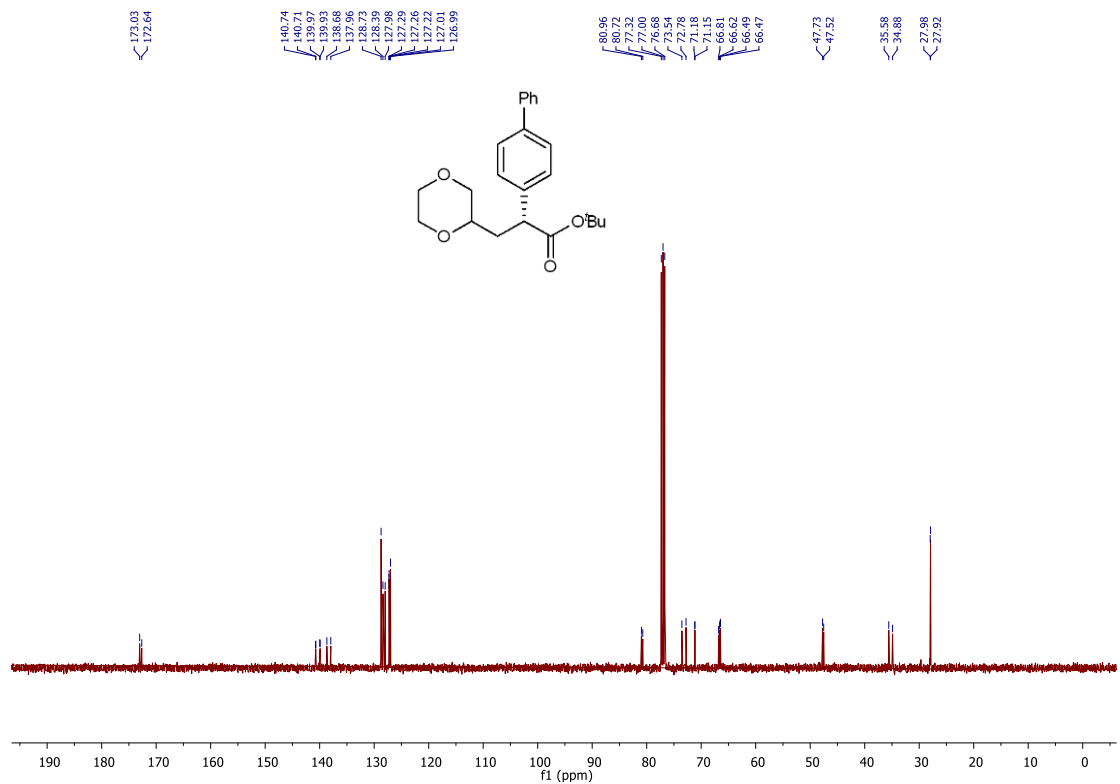

Supplementary Figure 134.  $^{13}\text{C}$  NMR of compound **58**.

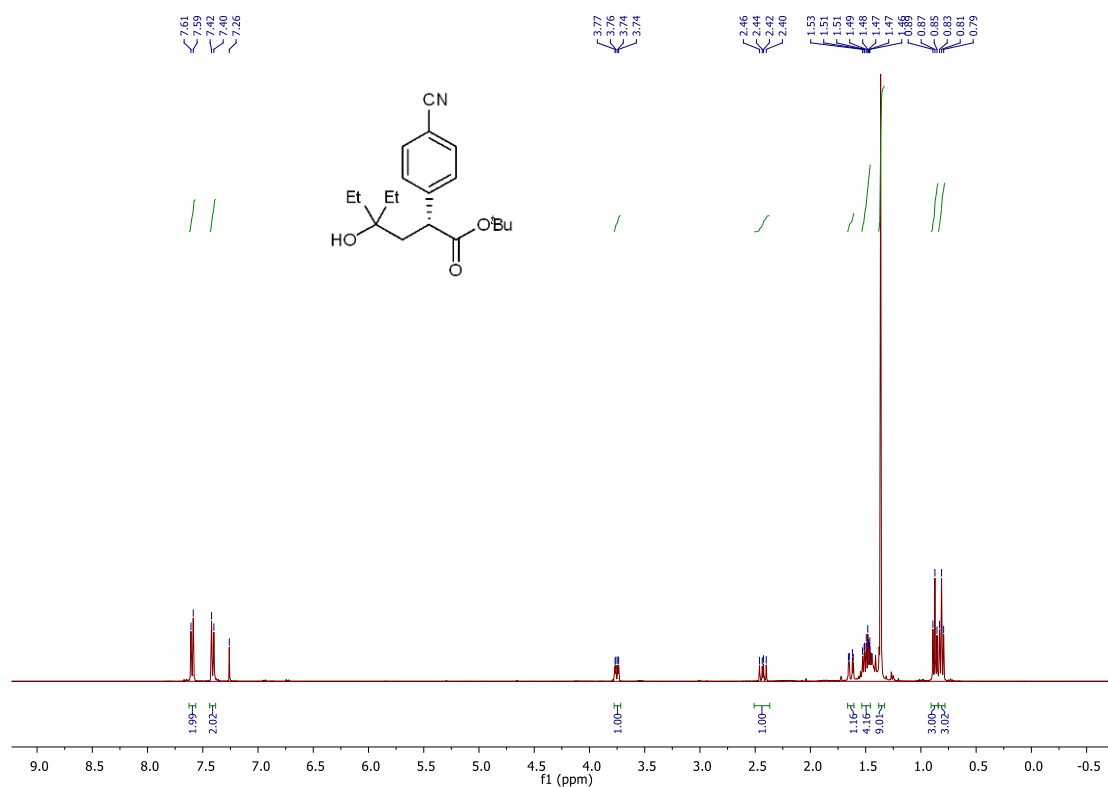

Supplementary Figure 135. <sup>1</sup>H NMR of compound 59.

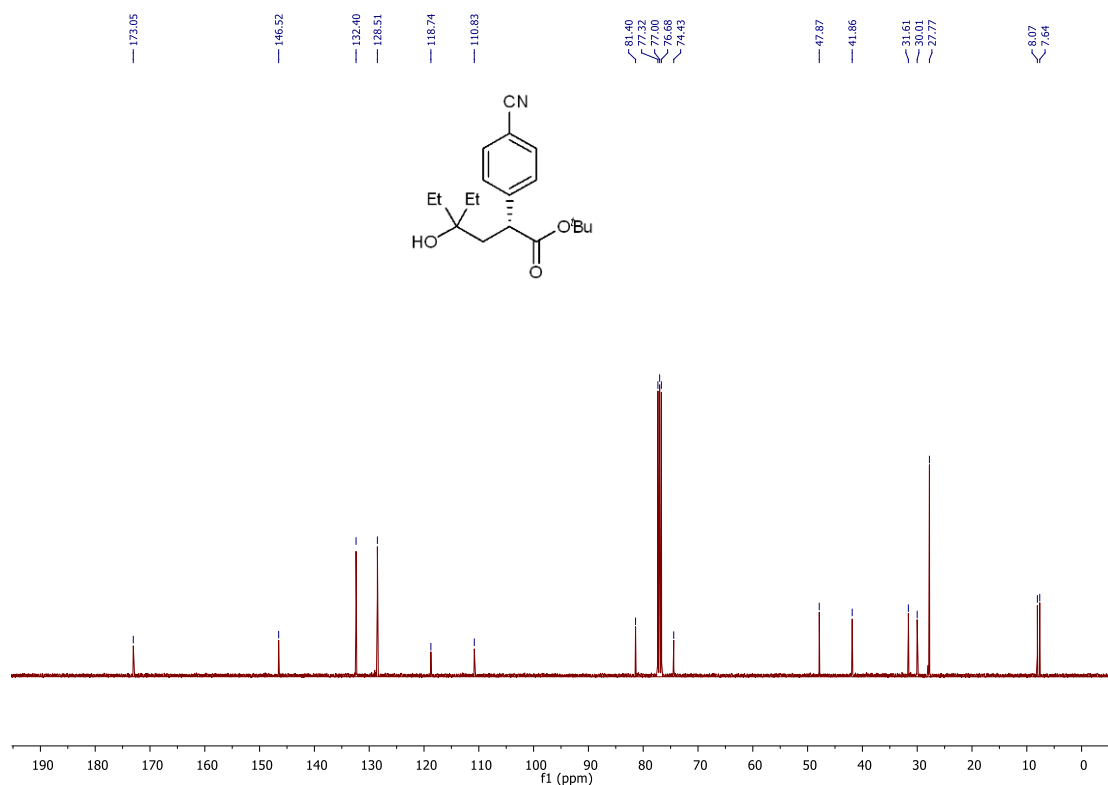

Supplementary Figure 136. <sup>13</sup>C NMR of compound 59.

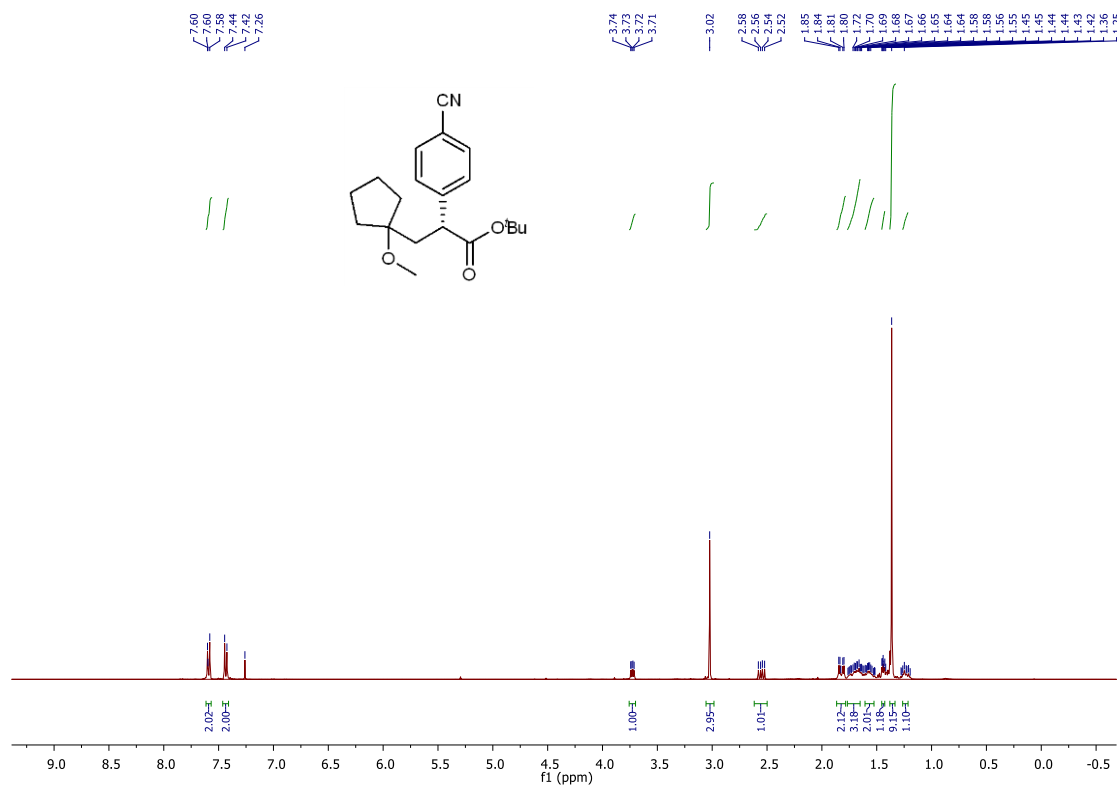

Supplementary Figure 137. <sup>1</sup>H NMR of compound 60.

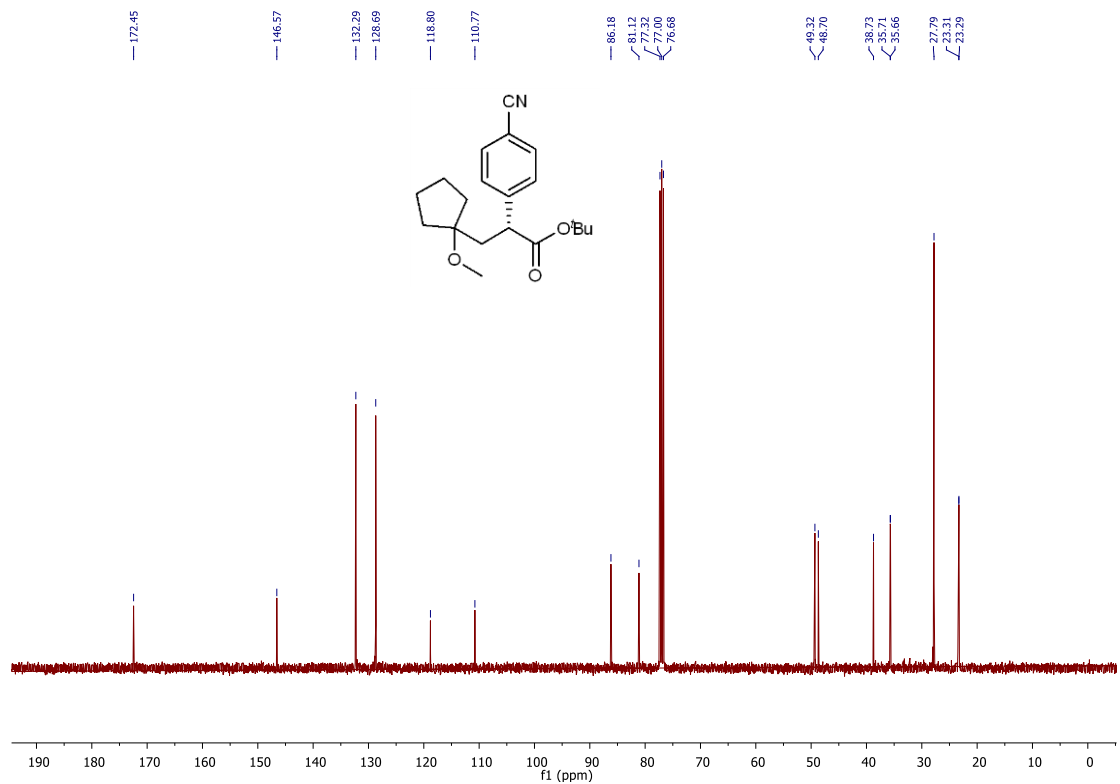

Supplementary Figure 138. <sup>13</sup>C NMR of compound 60.

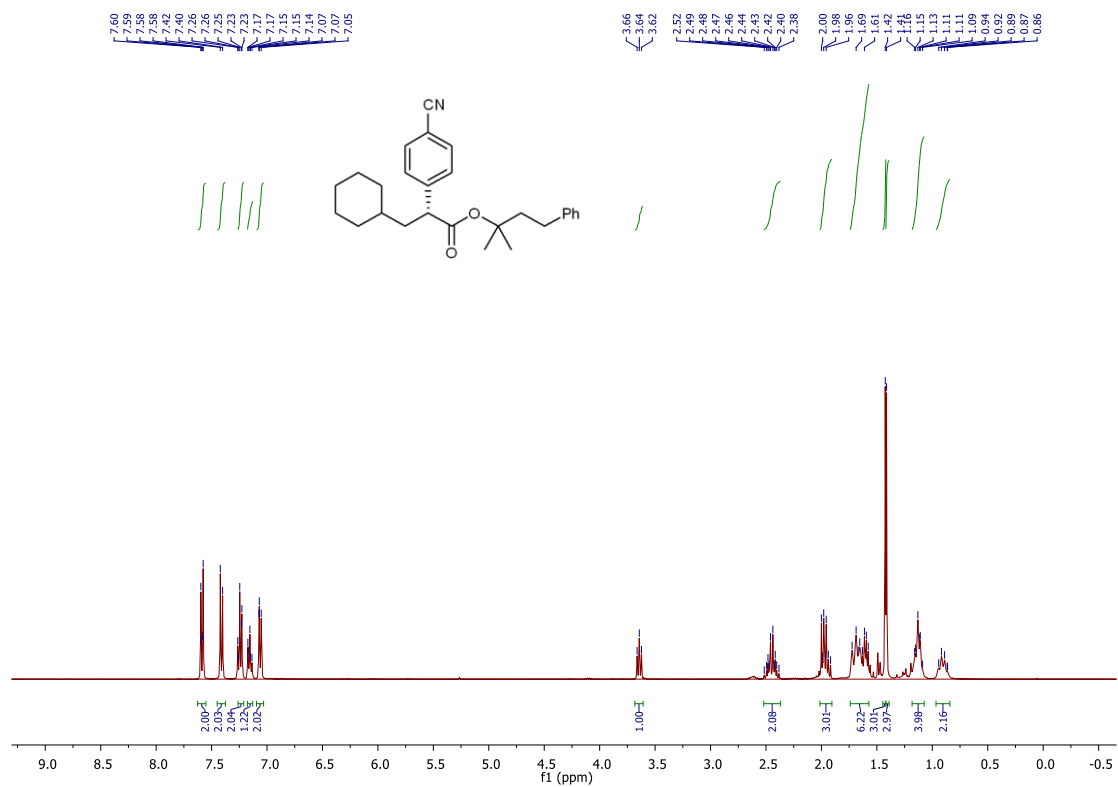

Supplementary Figure 139. <sup>1</sup>H NMR of compound 61.

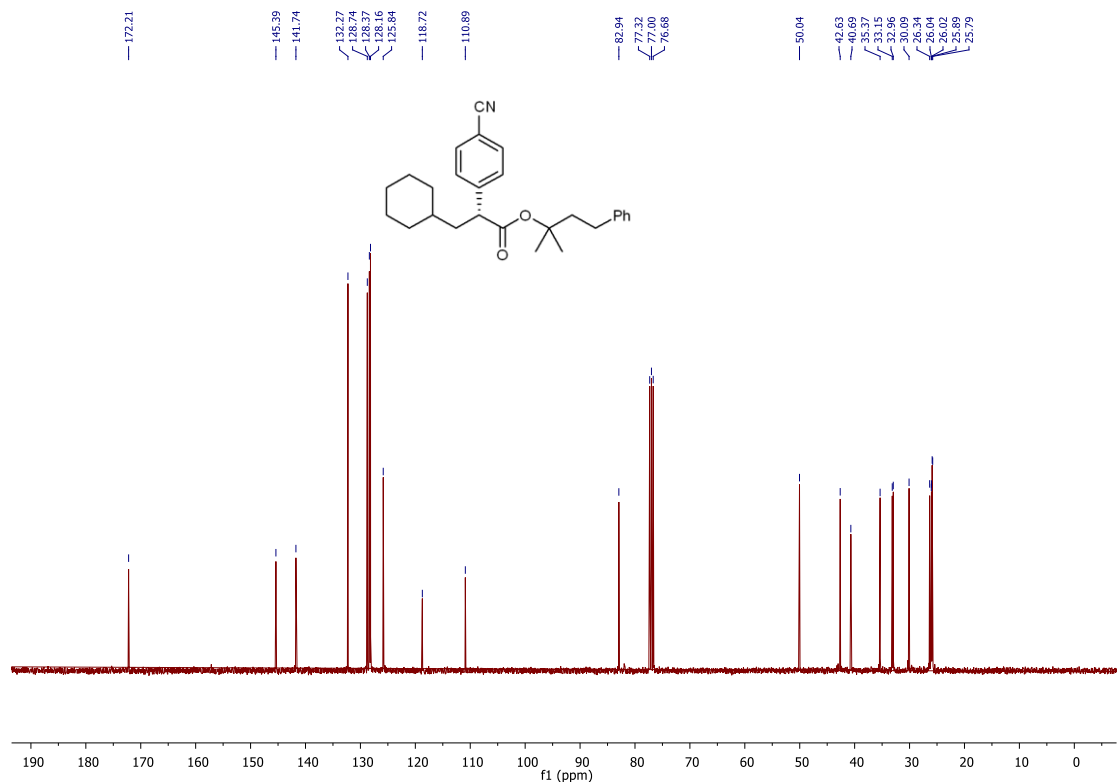

Supplementary Figure 140. <sup>13</sup>C NMR of compound 61.



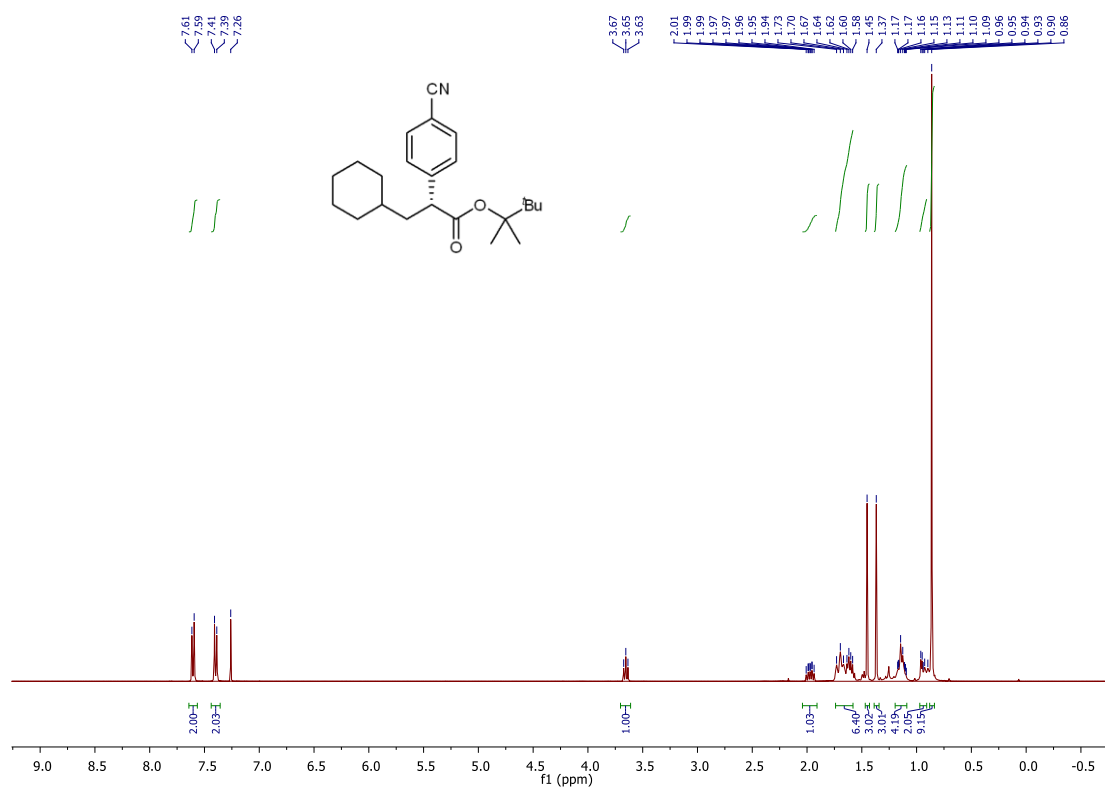

Supplementary Figure 141. <sup>1</sup>H NMR of compound 62.

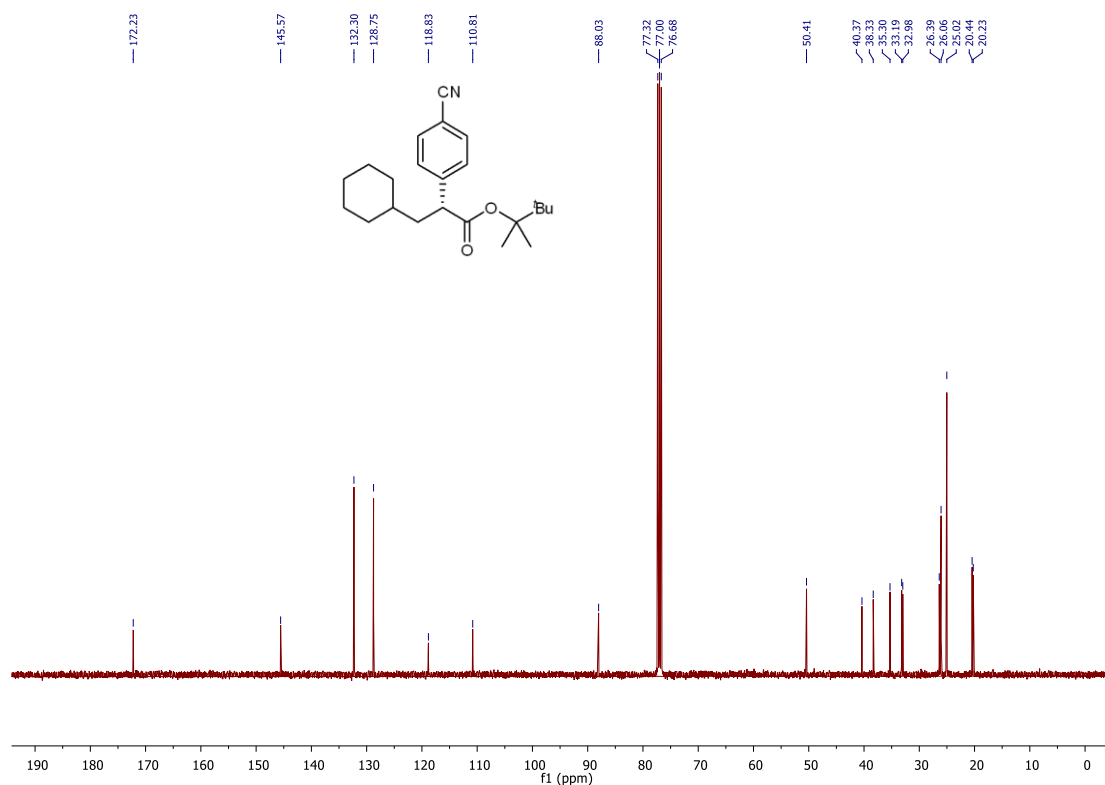

Supplementary Figure 142. <sup>13</sup>C NMR of compound 62.

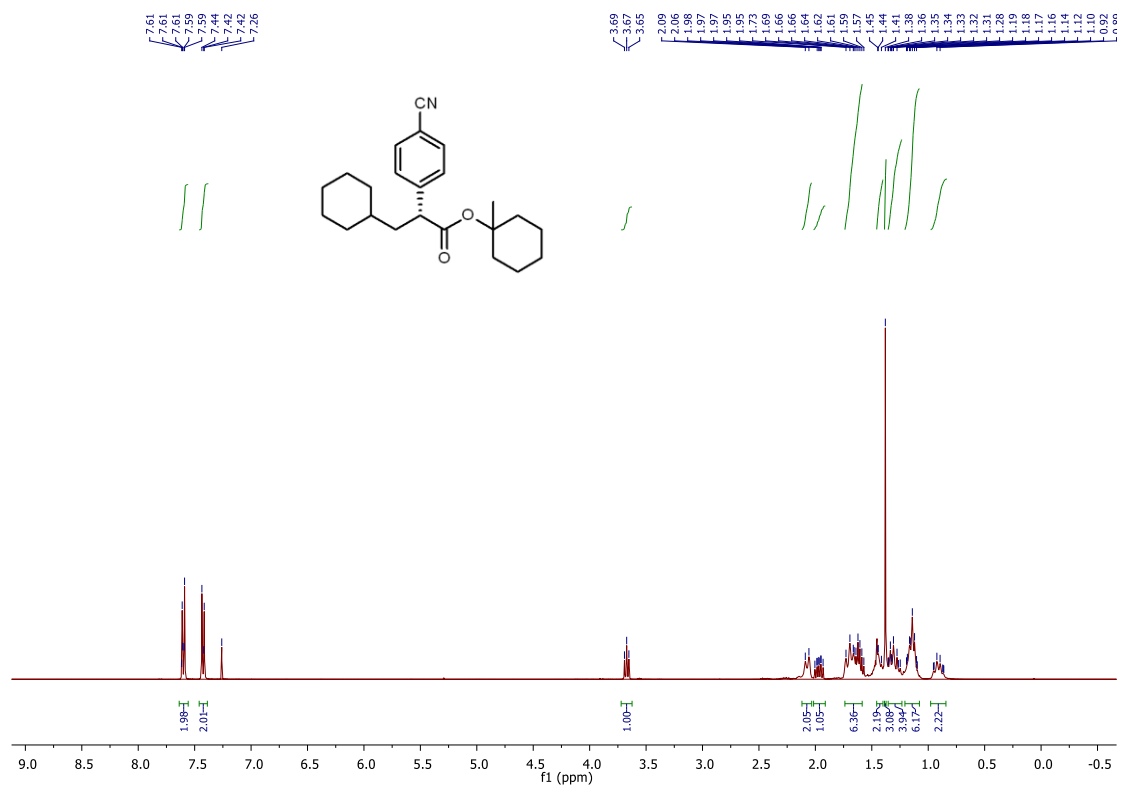

Supplementary Figure 143. <sup>1</sup>H NMR of compound 63.

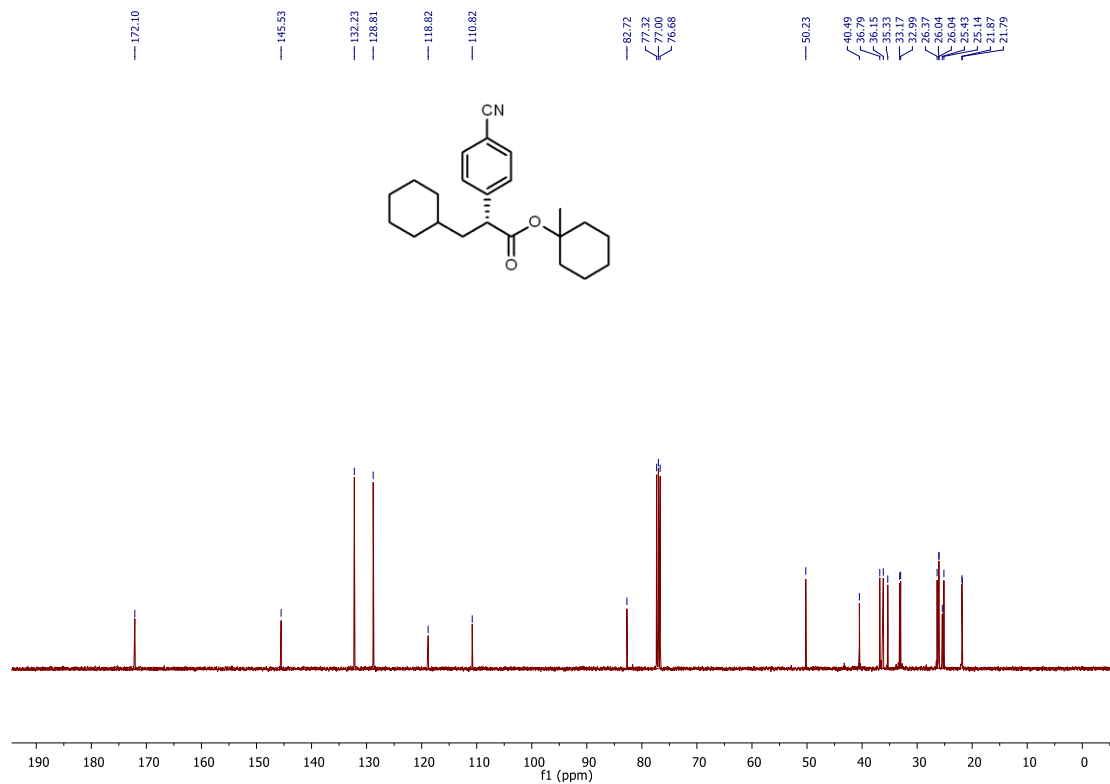

Supplementary Figure 144. <sup>13</sup>C NMR of compound 63.

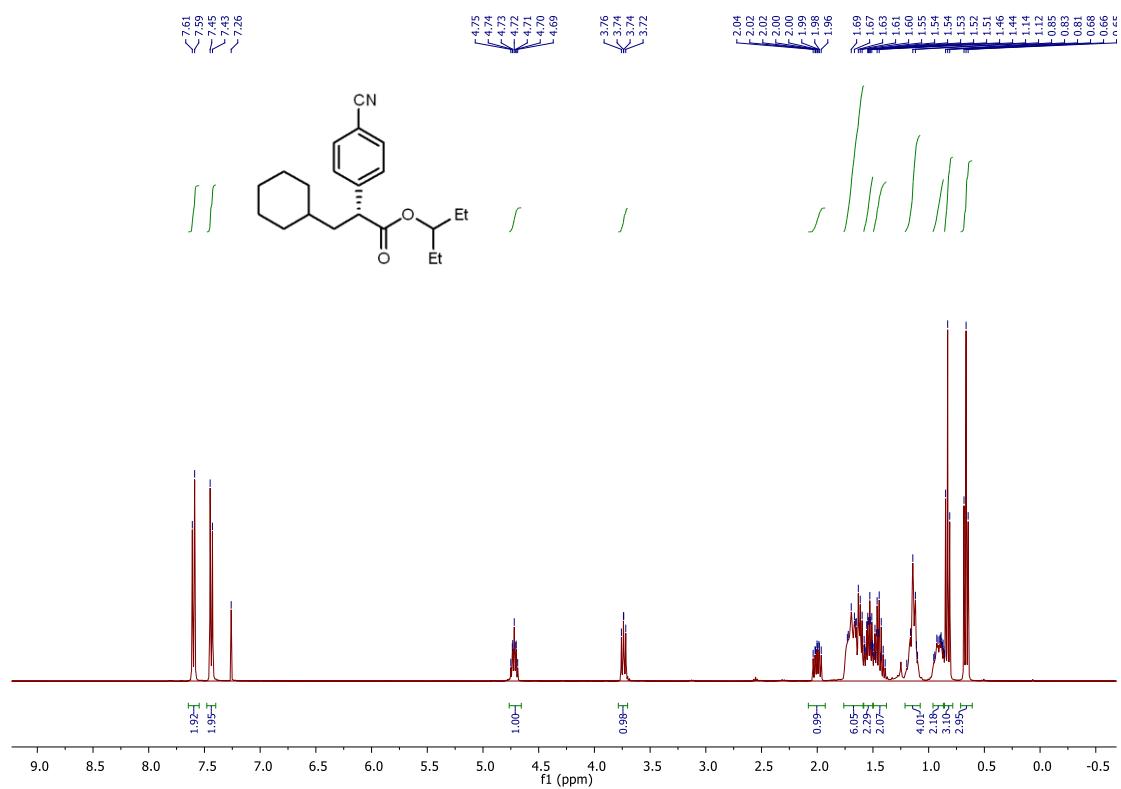

Supplementary Figure 145. <sup>1</sup>H NMR of compound **64**.

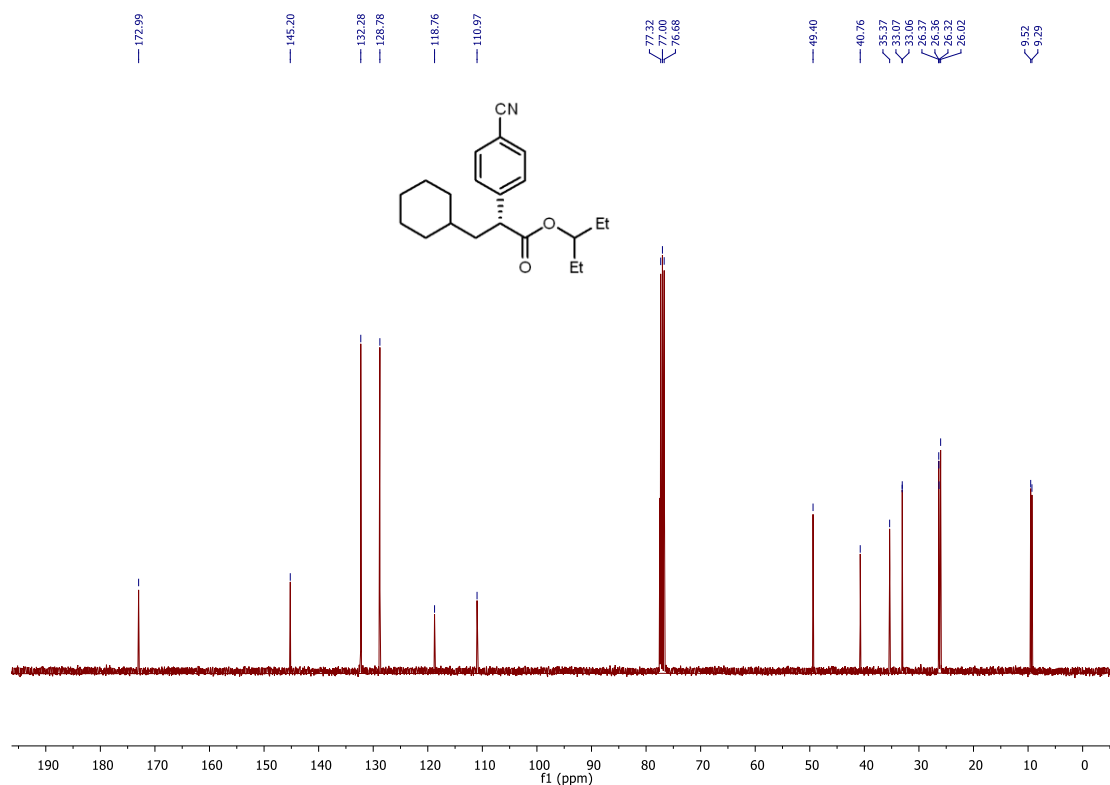

Supplementary Figure 146. <sup>13</sup>C NMR of compound **64**.

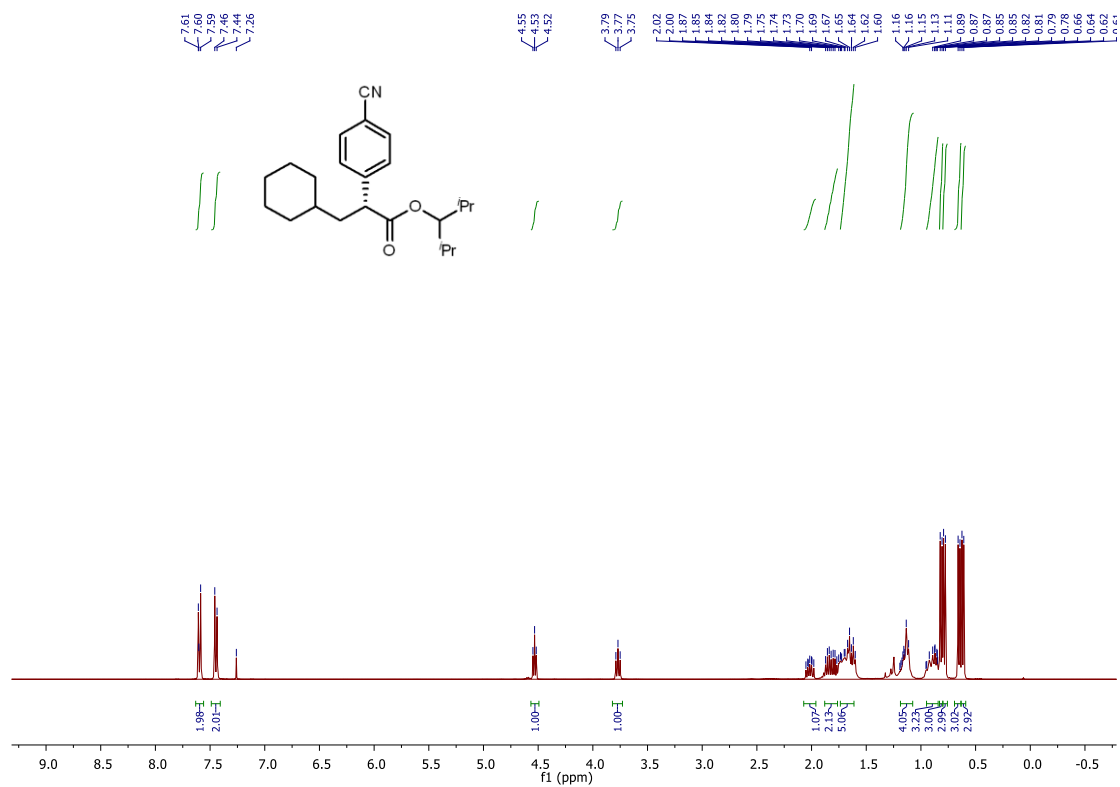

Supplementary Figure 147.  $^1\text{H}$  NMR of compound **65**.

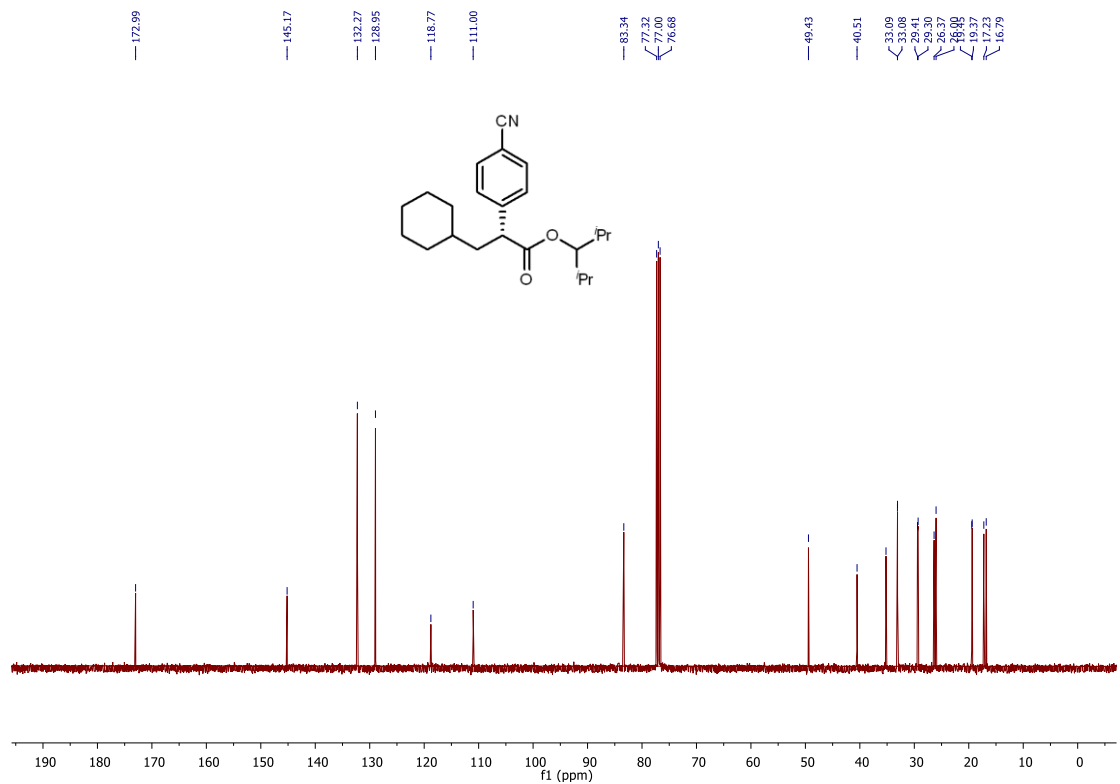

Supplementary Figure 148.  $^{13}\text{C}$  NMR of compound **65**.



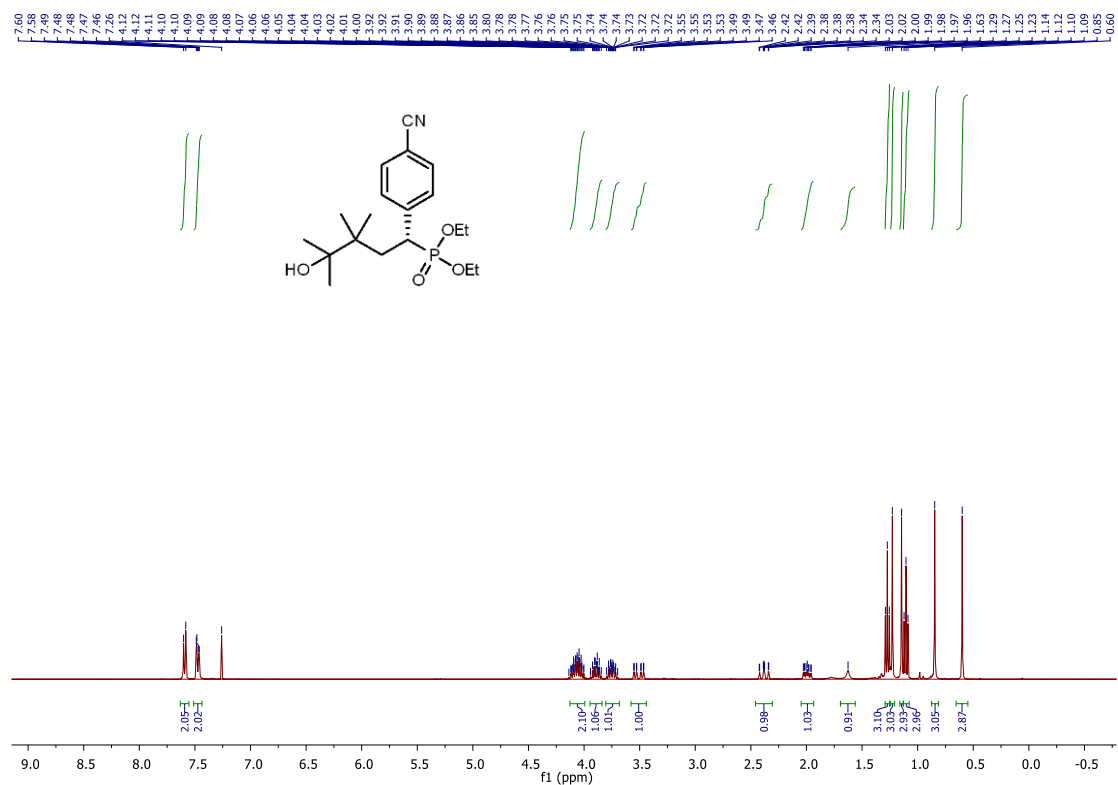

Supplementary Figure 151. <sup>1</sup>H NMR of compound 67.

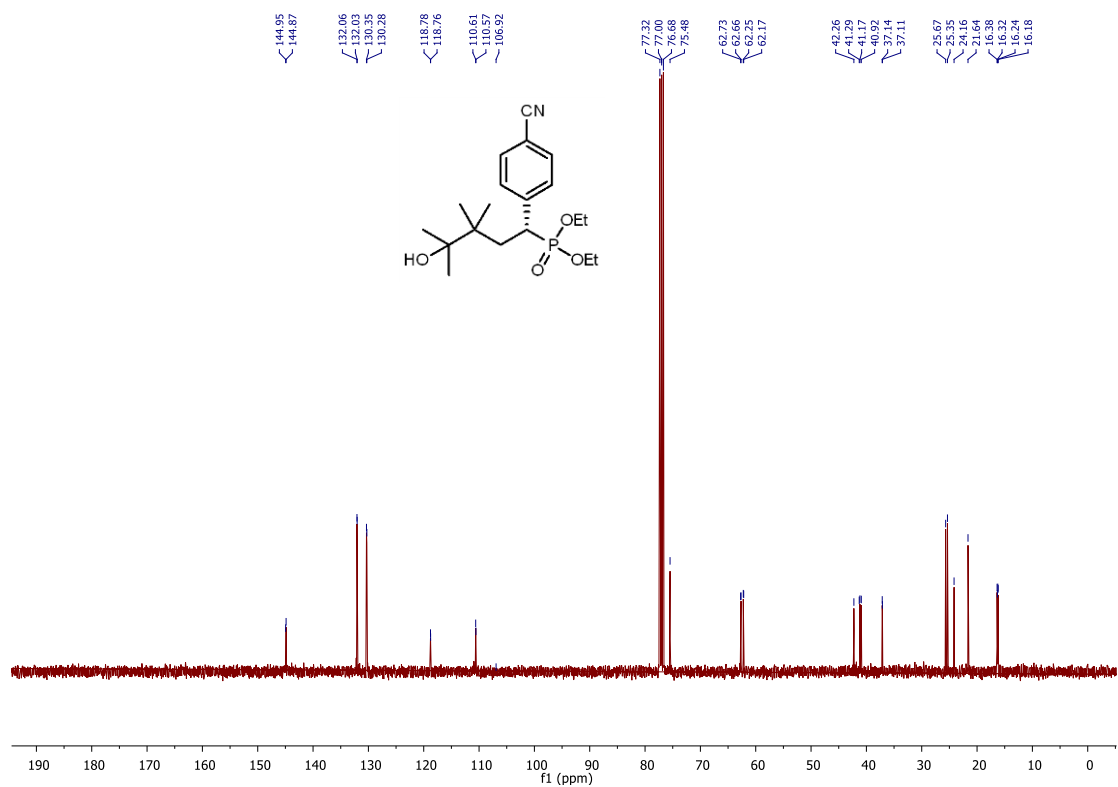

Supplementary Figure 152. <sup>13</sup>C NMR of compound 67.

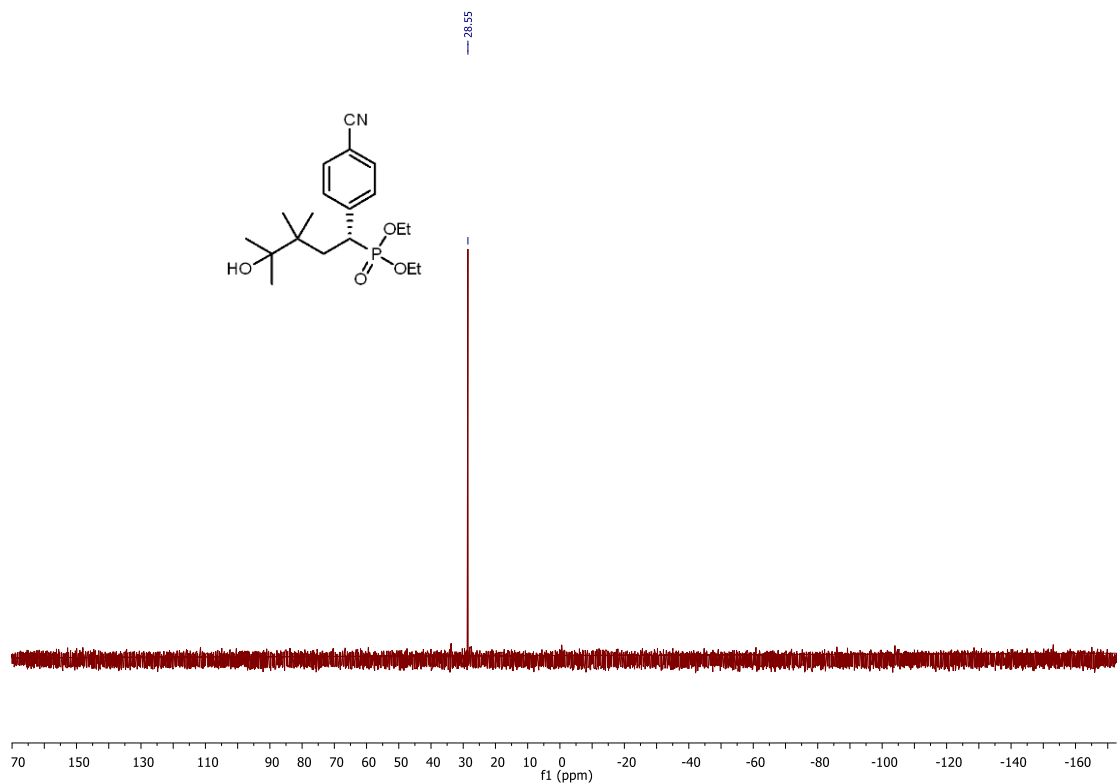

Supplementary Figure 153.  $^{31}\text{P}$  NMR of compound 67.

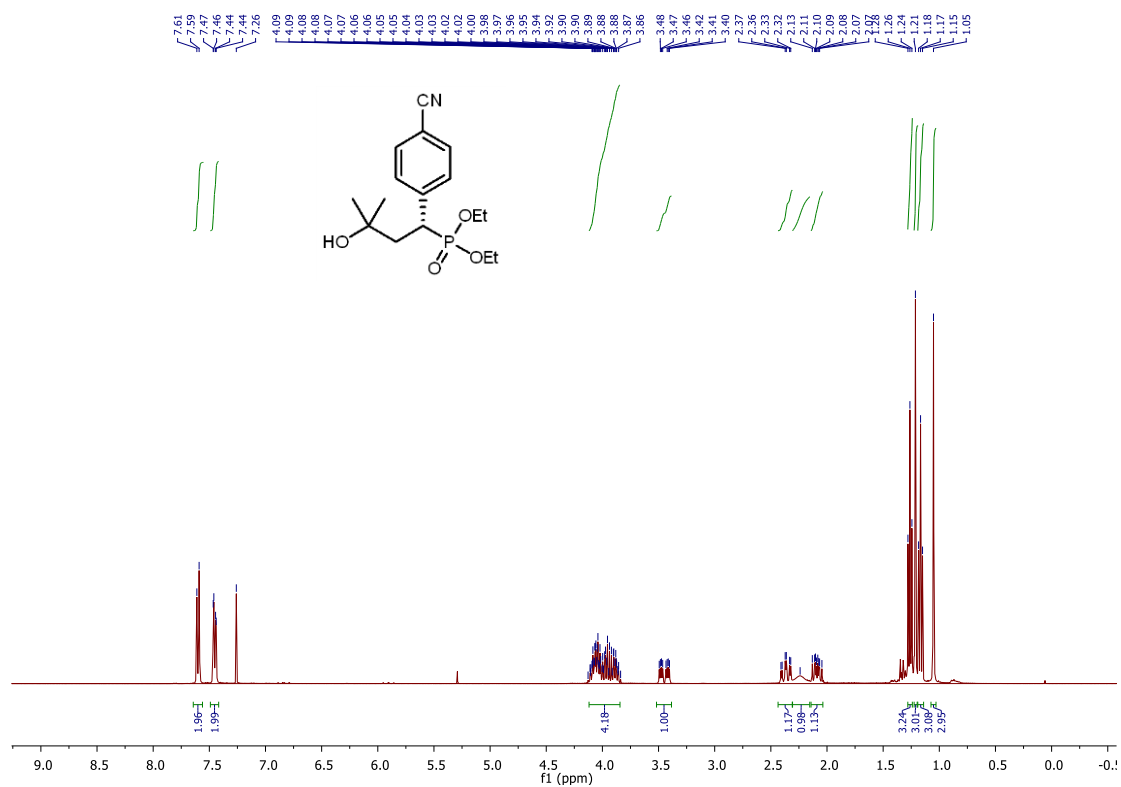

Supplementary Figure 154.  $^1\text{H}$  NMR of compound 68.

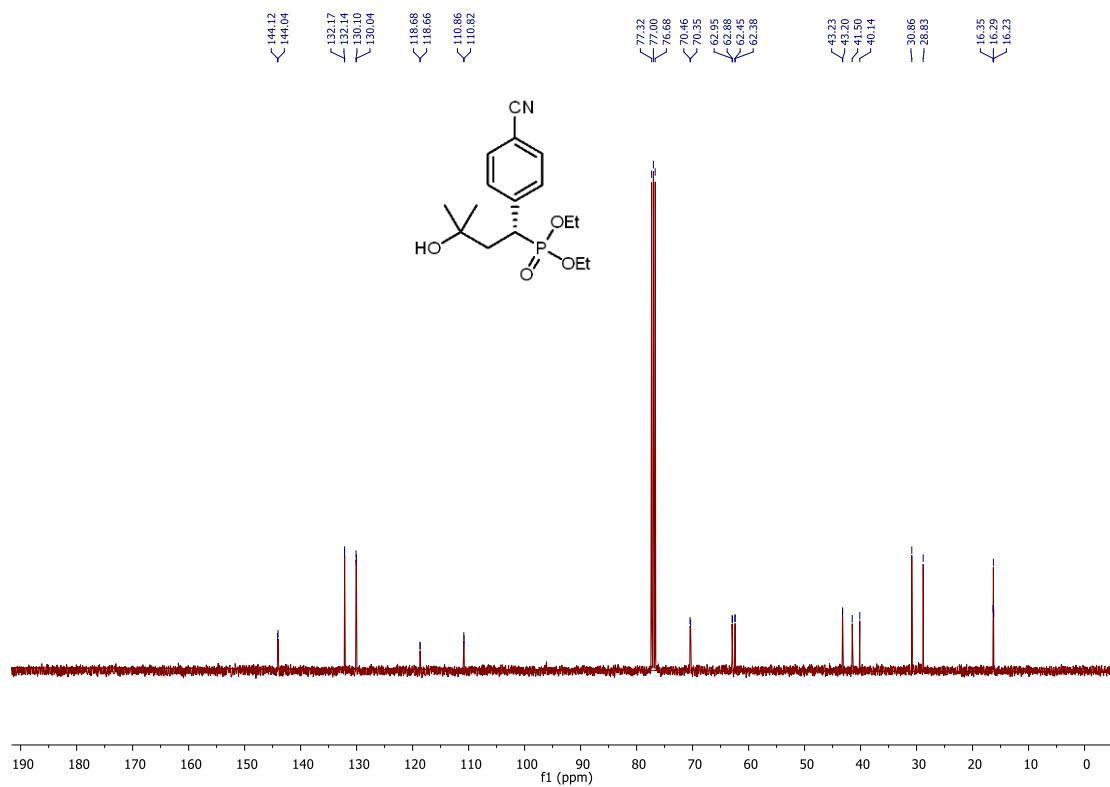

Supplementary Figure 155. <sup>13</sup>C NMR of compound 68.

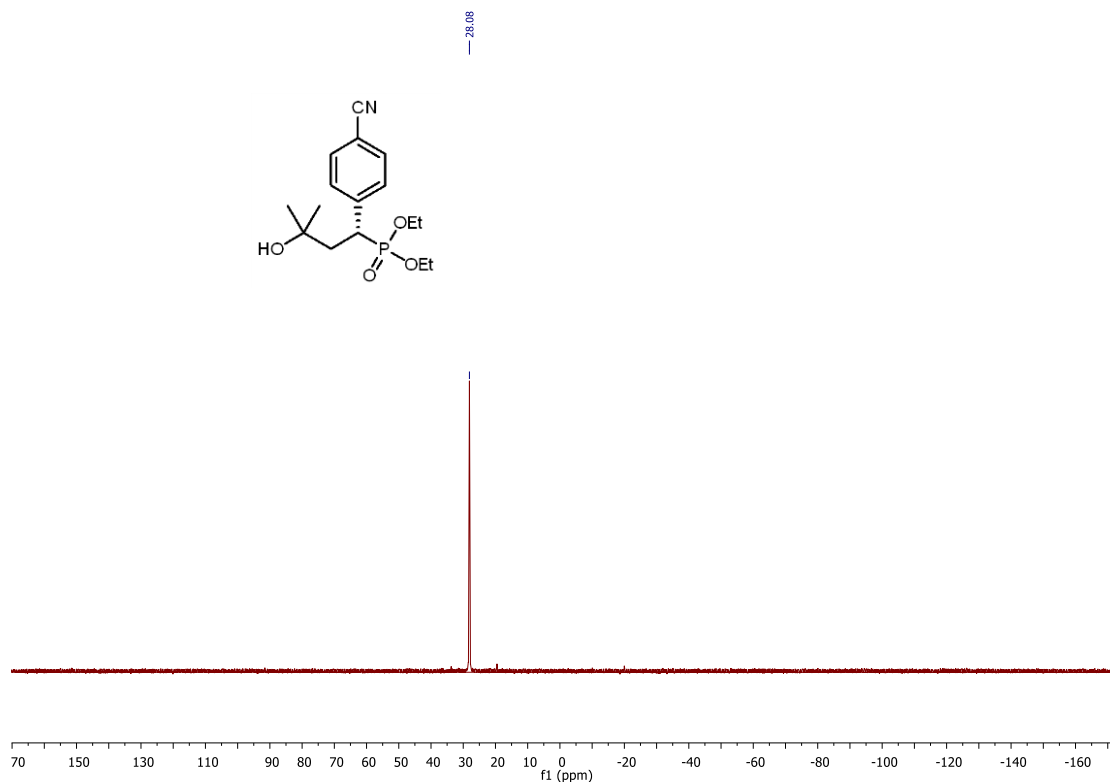

Supplementary Figure 156. <sup>31</sup>P NMR of compound 68.



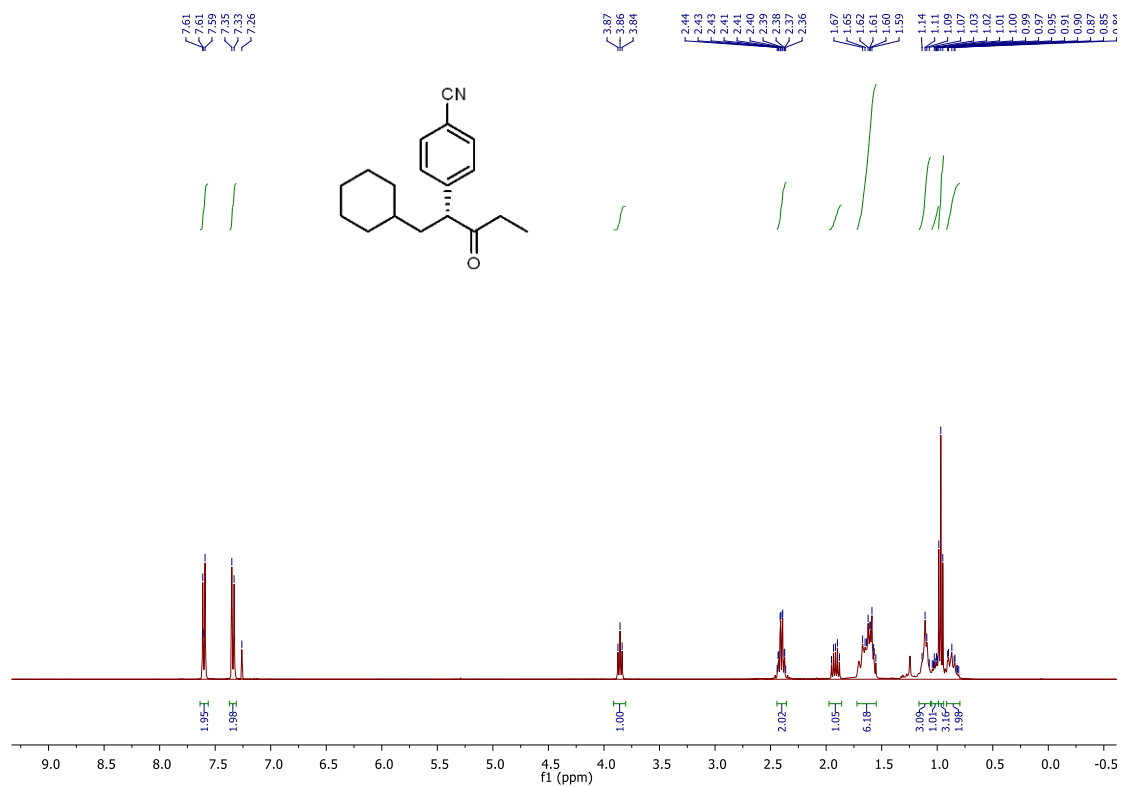

Supplementary Figure 157. <sup>1</sup>H NMR of compound 69.

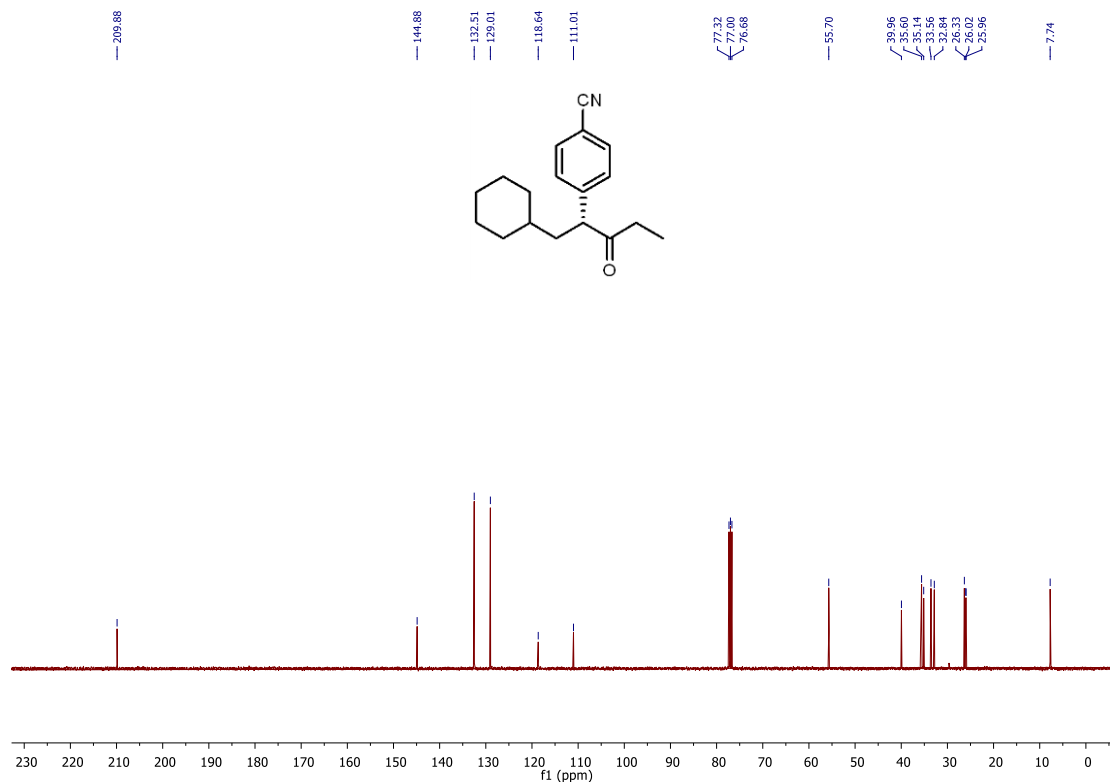

Supplementary Figure 158. <sup>13</sup>C NMR of compound 69.

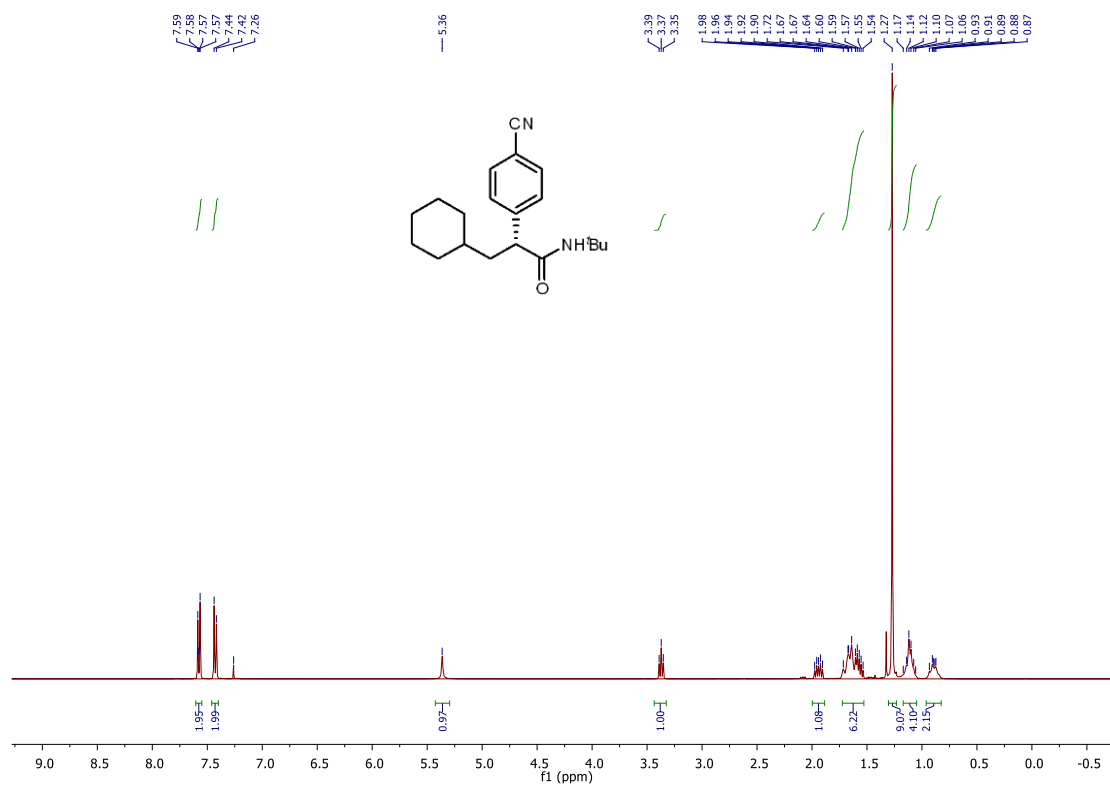

Supplementary Figure 159. <sup>1</sup>H NMR of compound 70.

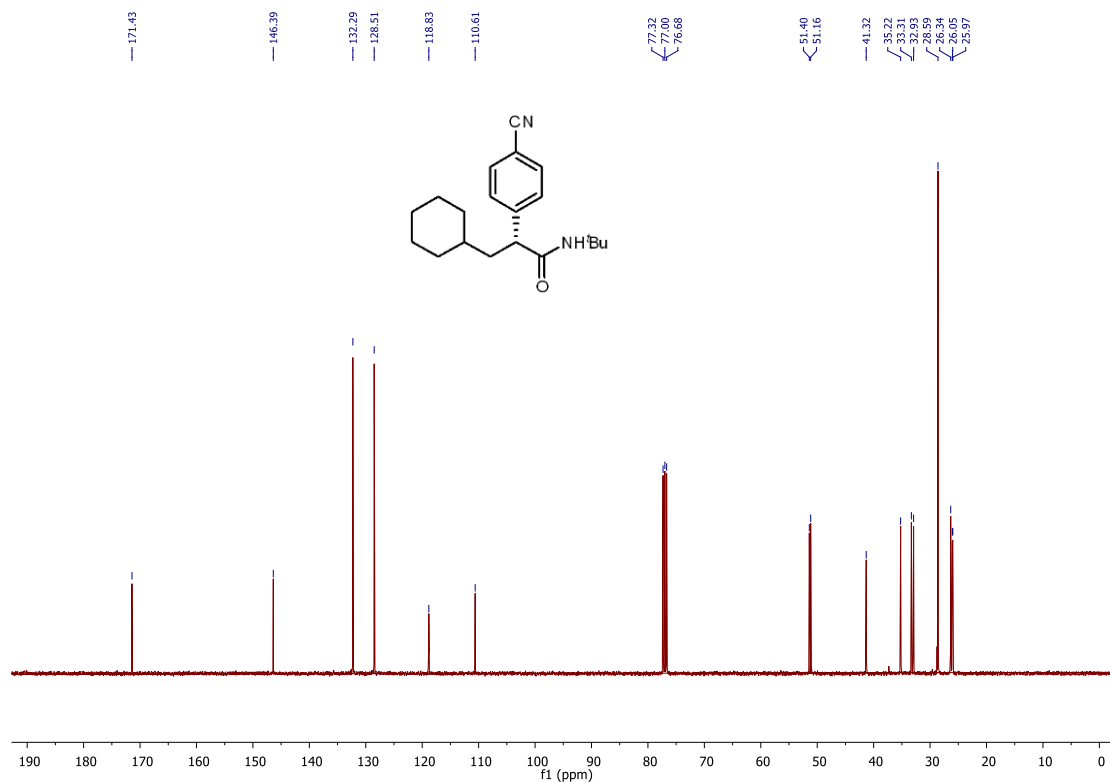

Supplementary Figure 160. <sup>13</sup>C NMR of compound 70.

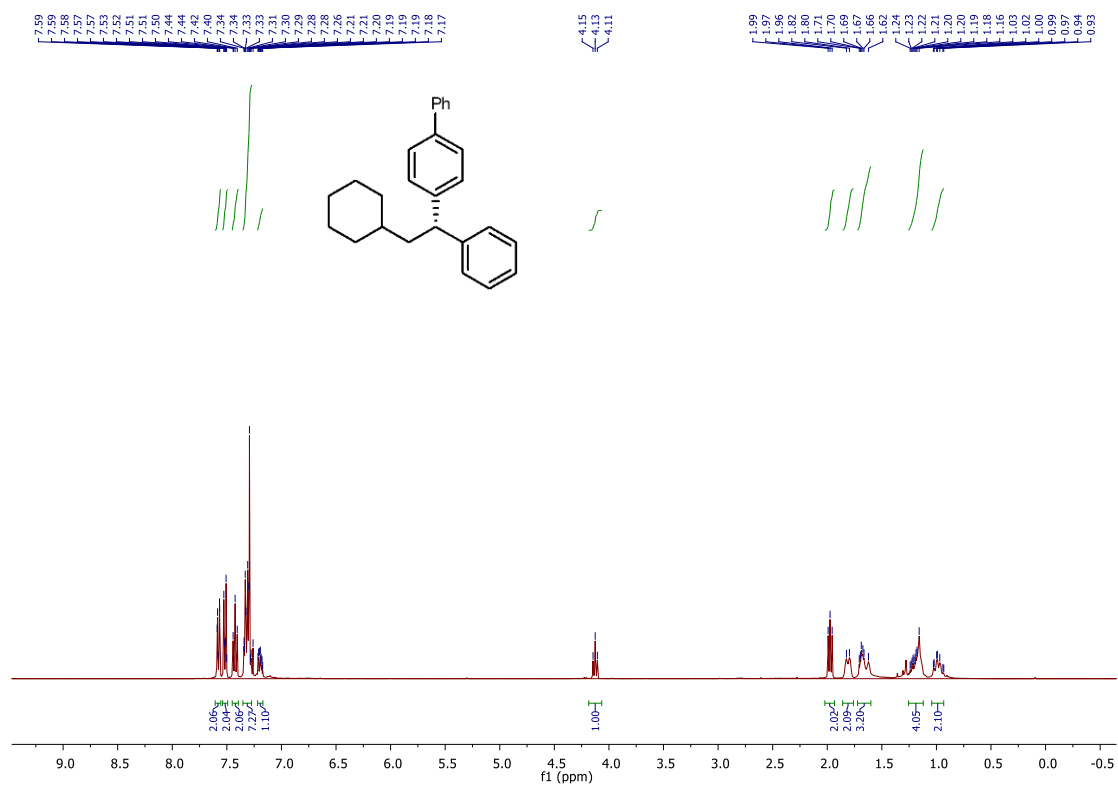

Supplementary Figure 161. <sup>1</sup>H NMR of compound 71.

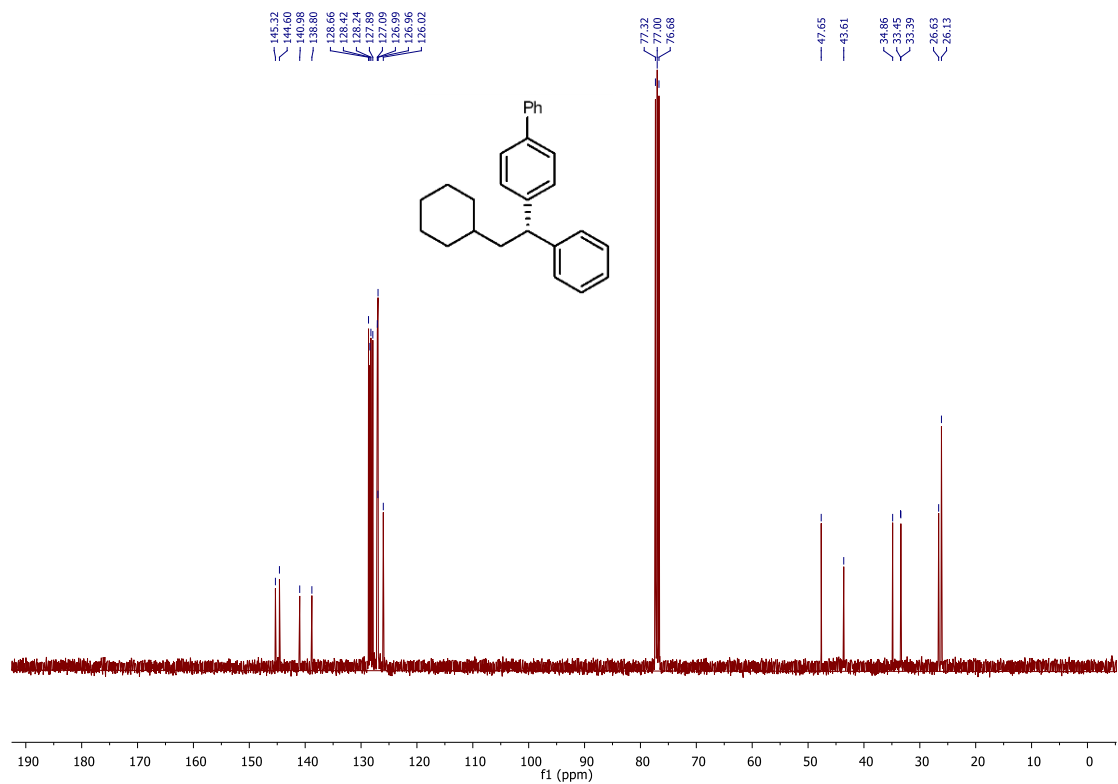

Supplementary Figure 162. <sup>13</sup>C NMR of compound 71.

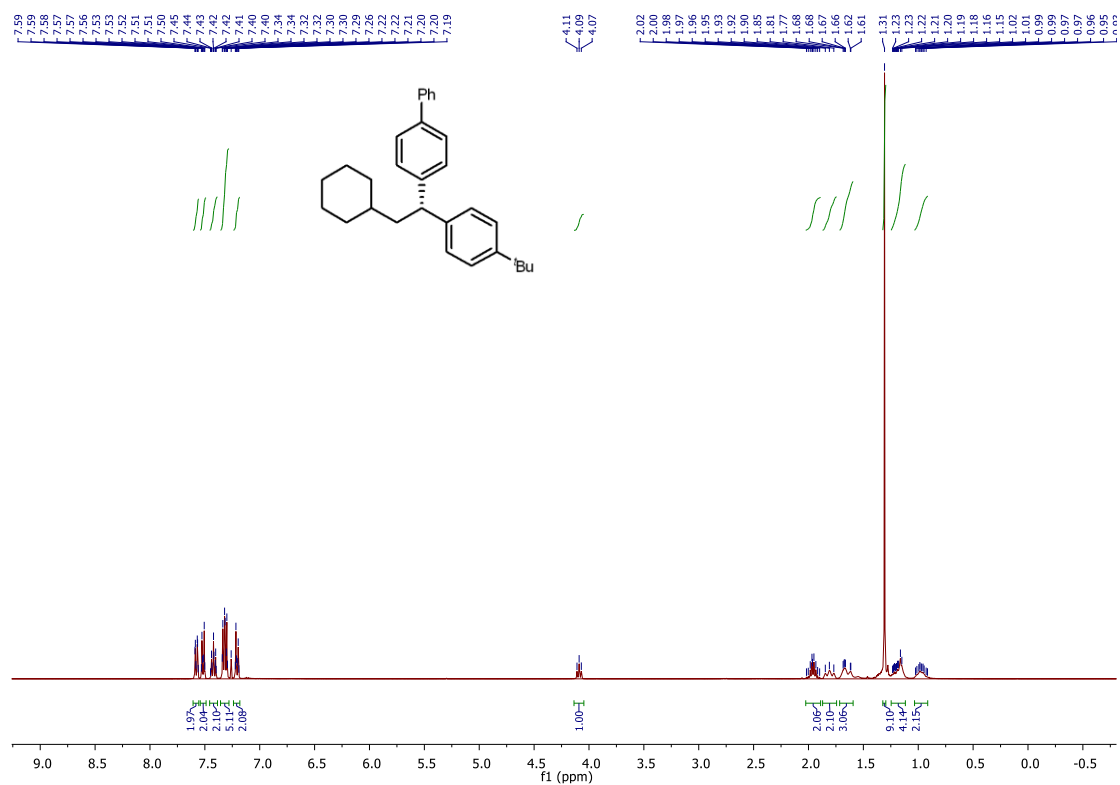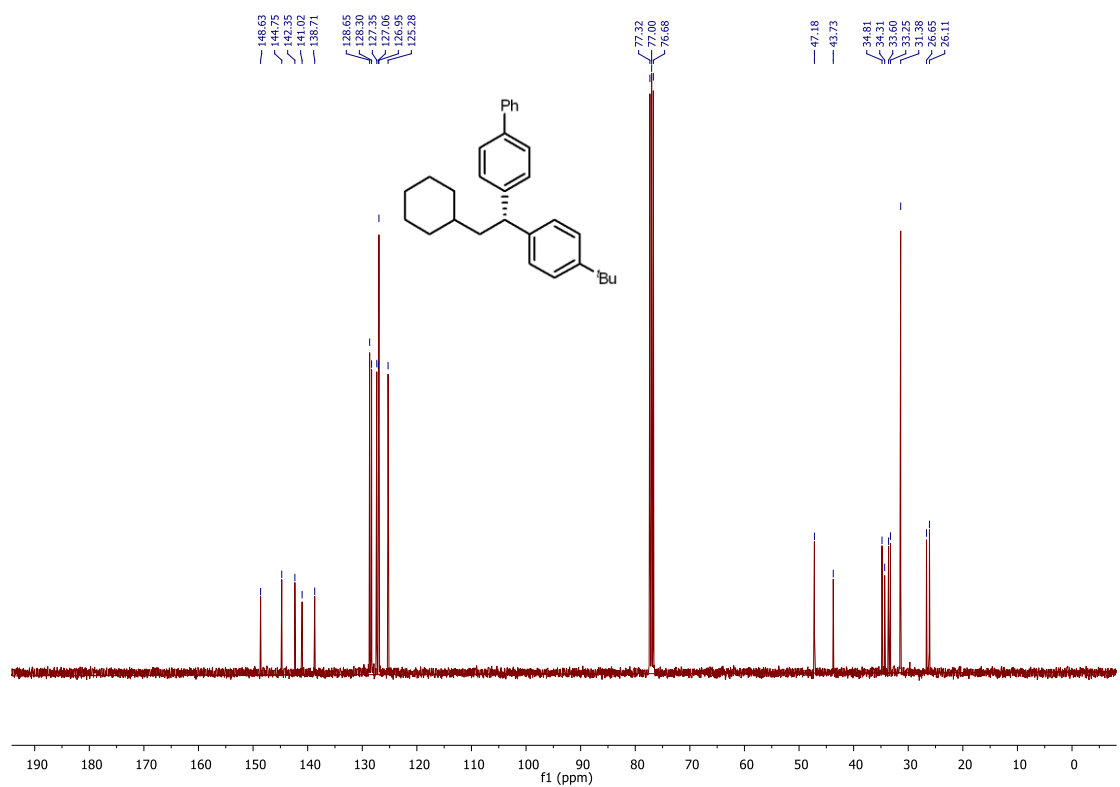

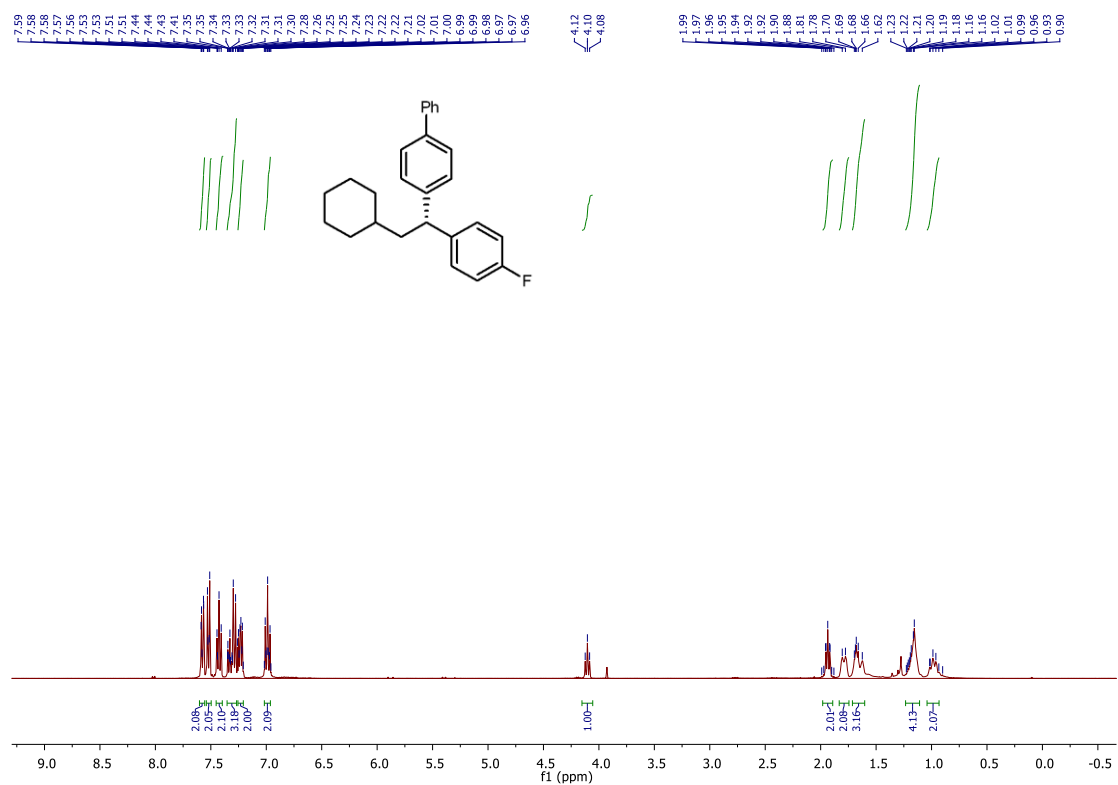

Supplementary Figure 165. <sup>1</sup>H NMR of compound 73.

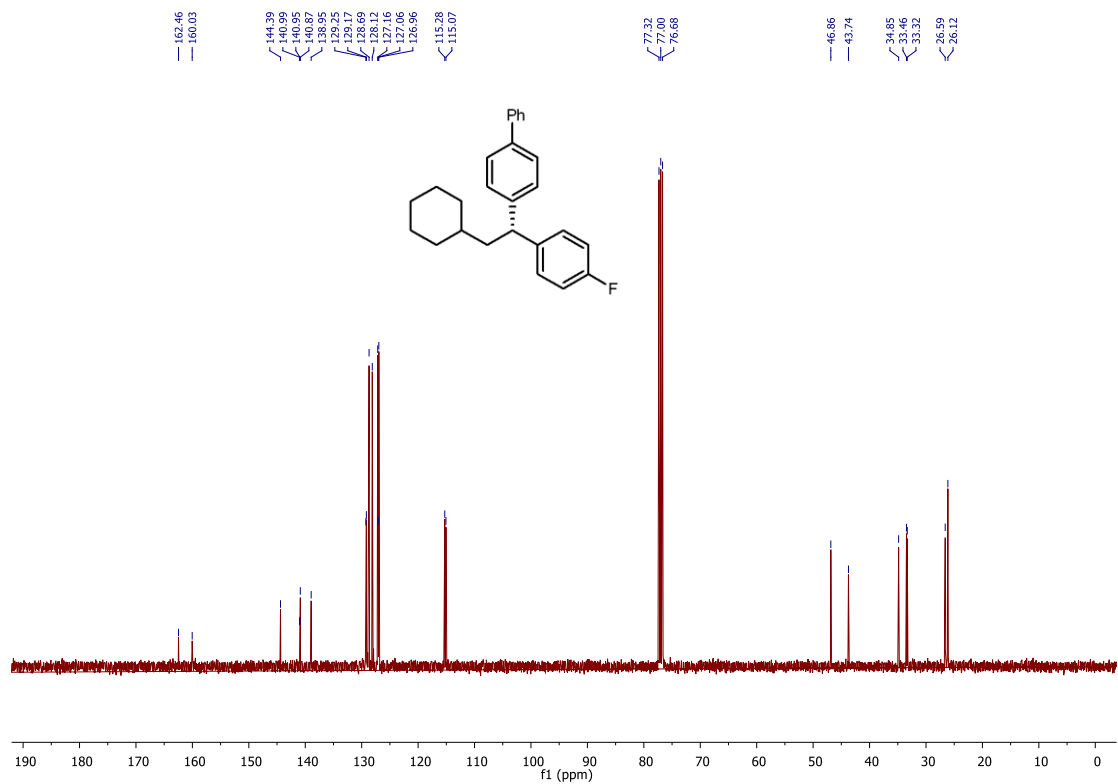

Supplementary Figure 166. <sup>13</sup>C NMR of compound 73.

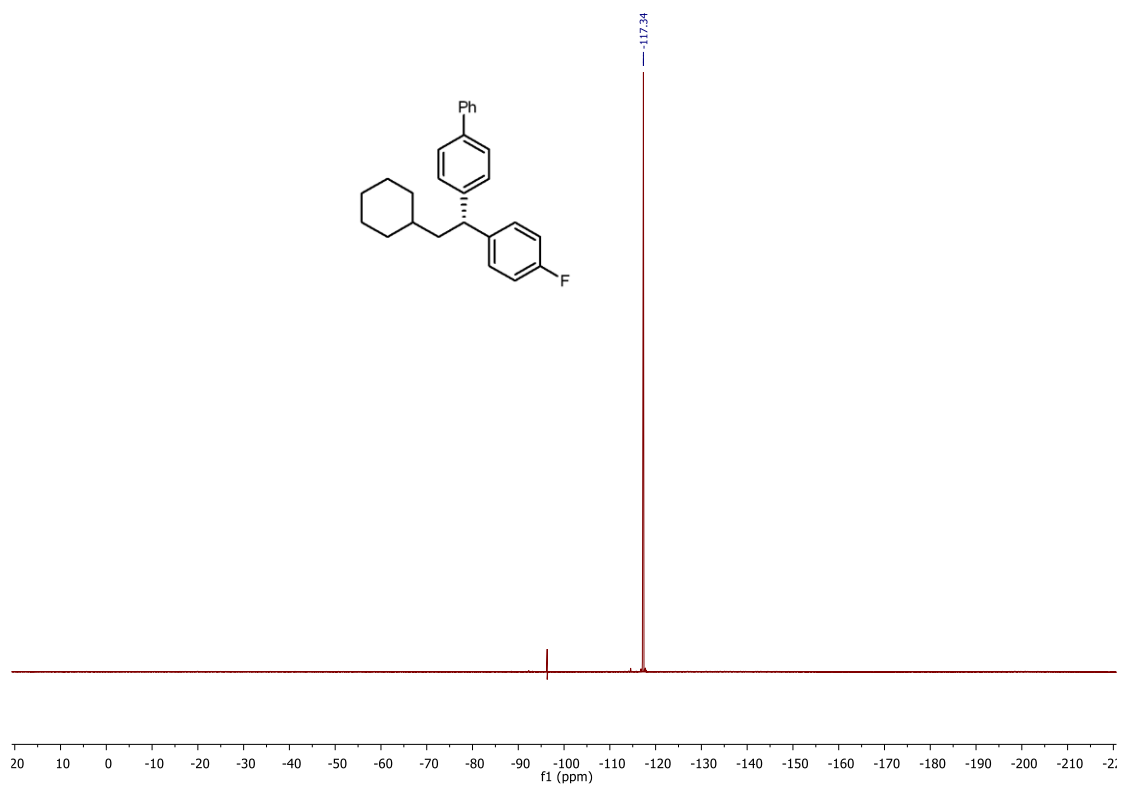

Supplementary Figure 167.  $^{19}\text{F}$  NMR of compound 73.

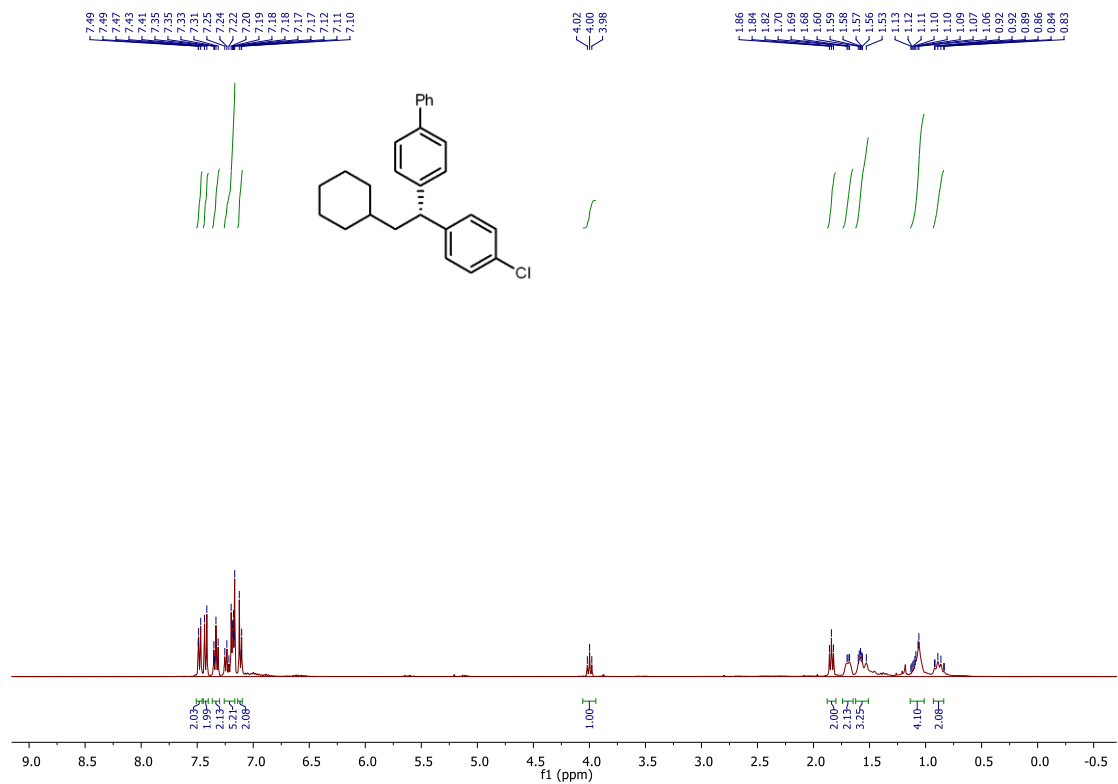

Supplementary Figure 168.  $^1\text{H}$  NMR of compound 74.

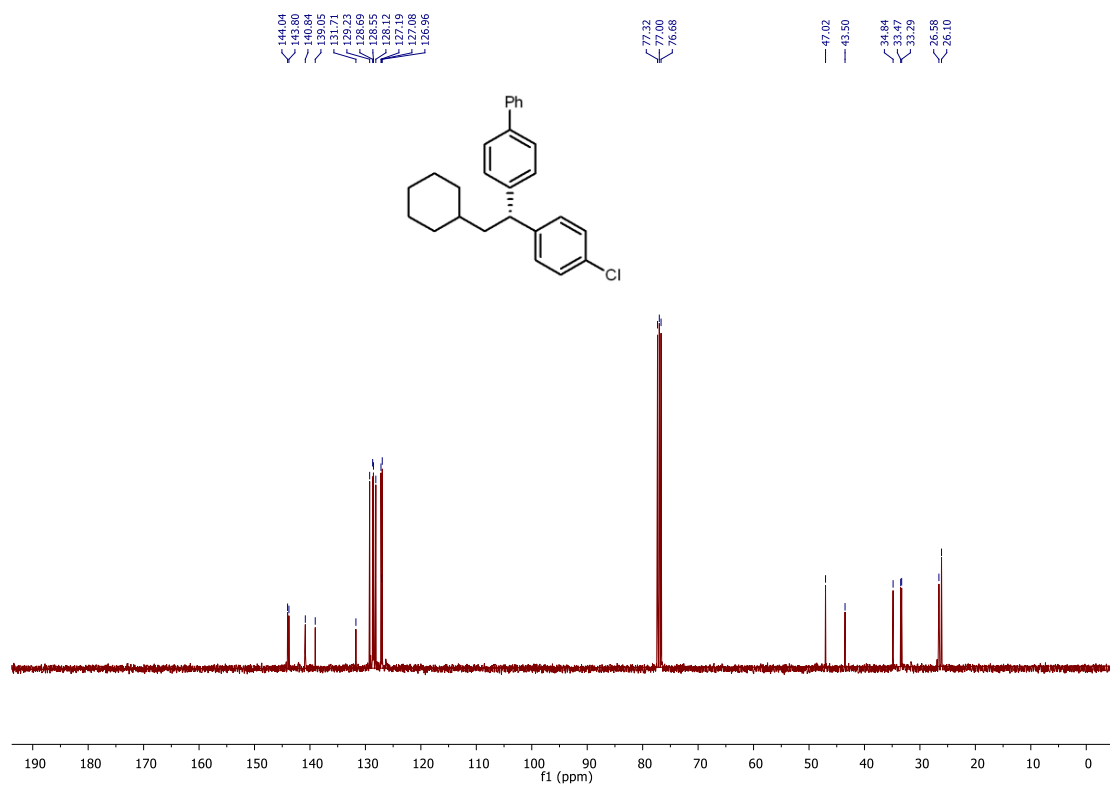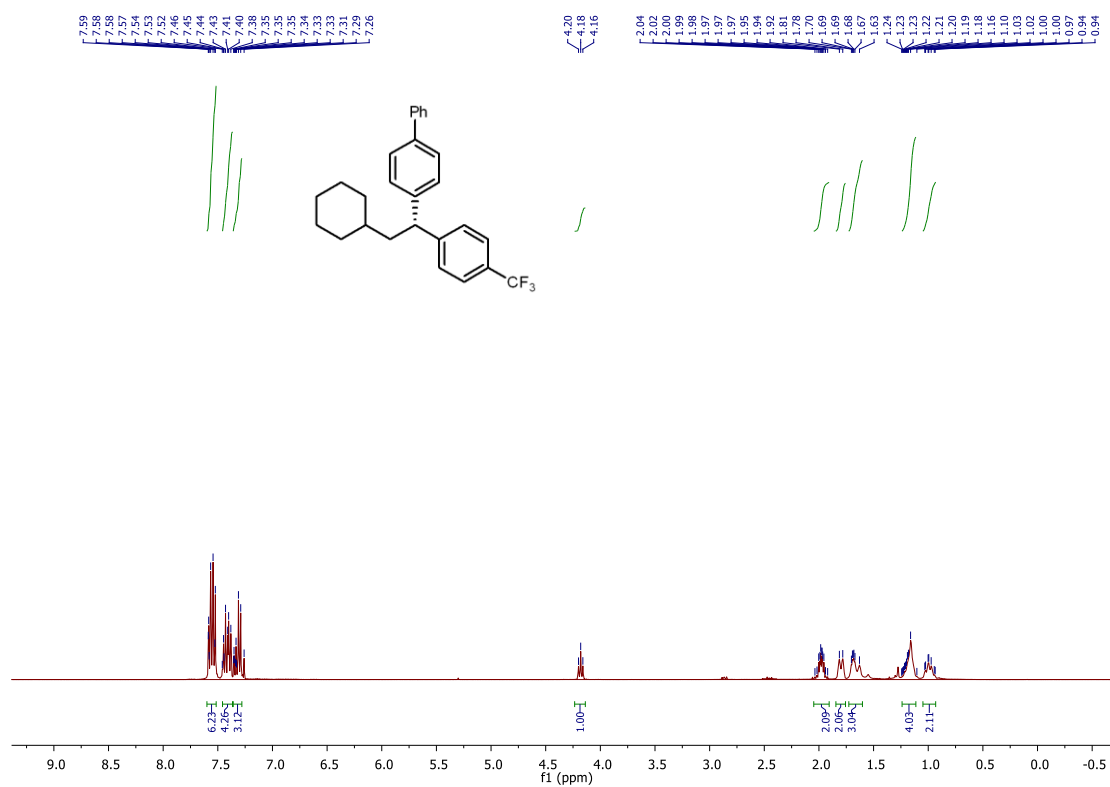

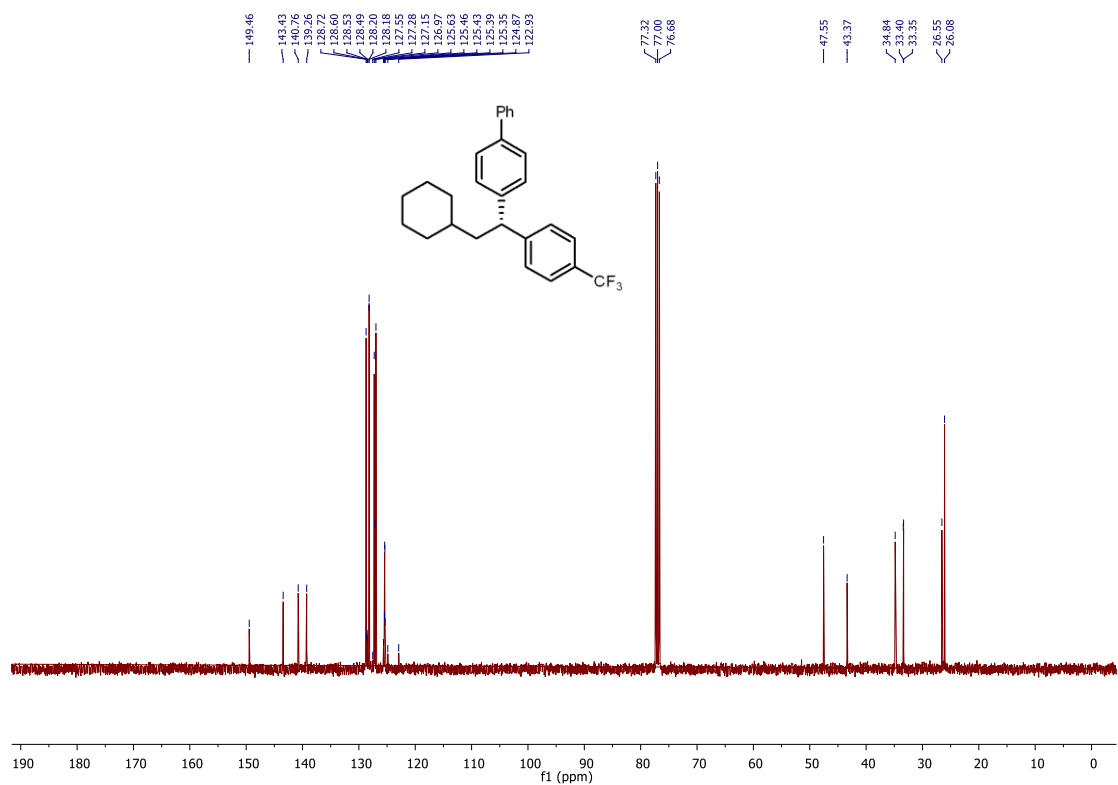

Supplementary Figure 171. <sup>13</sup>C NMR of compound 75.

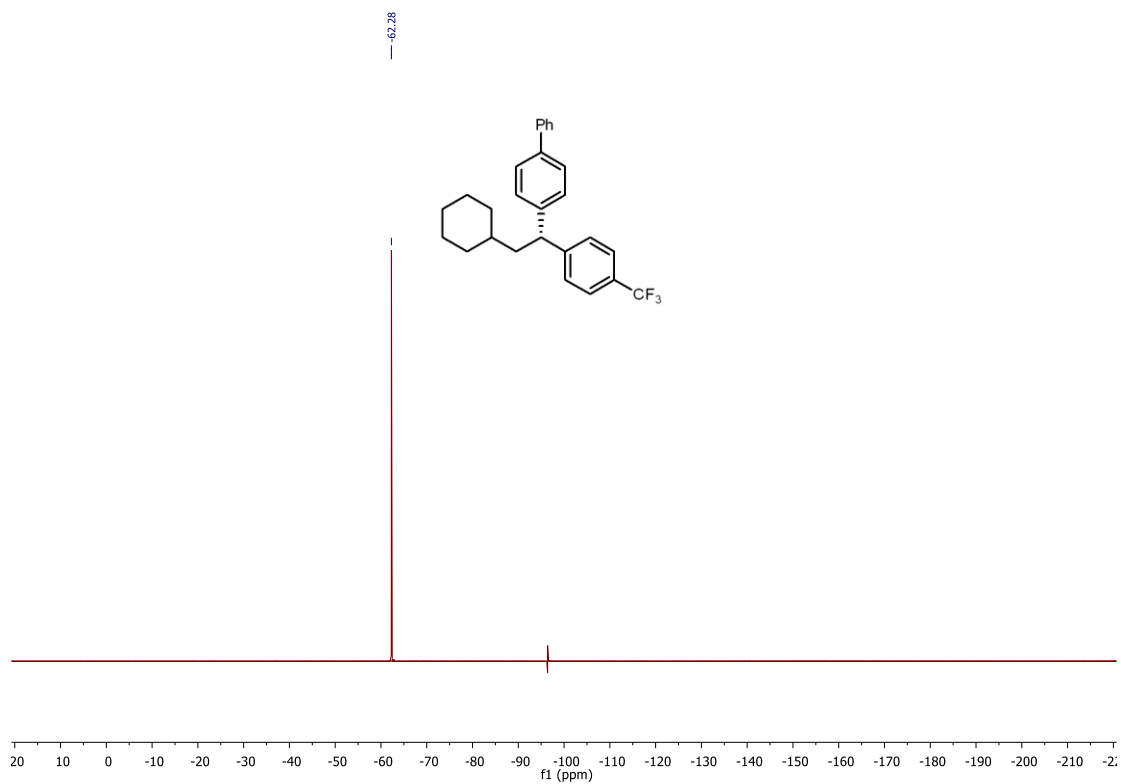

Supplementary Figure 172. <sup>19</sup>F NMR of compound 75.



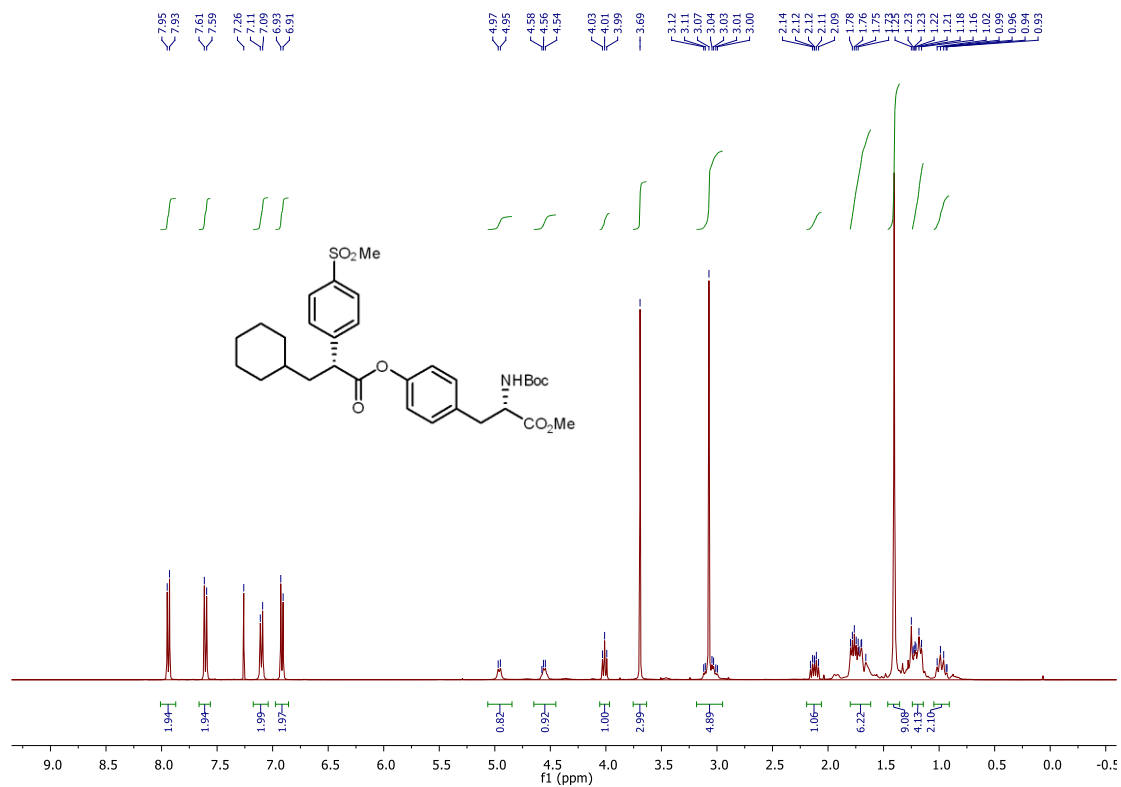

Supplementary Figure 173. <sup>1</sup>H NMR of compound 76.

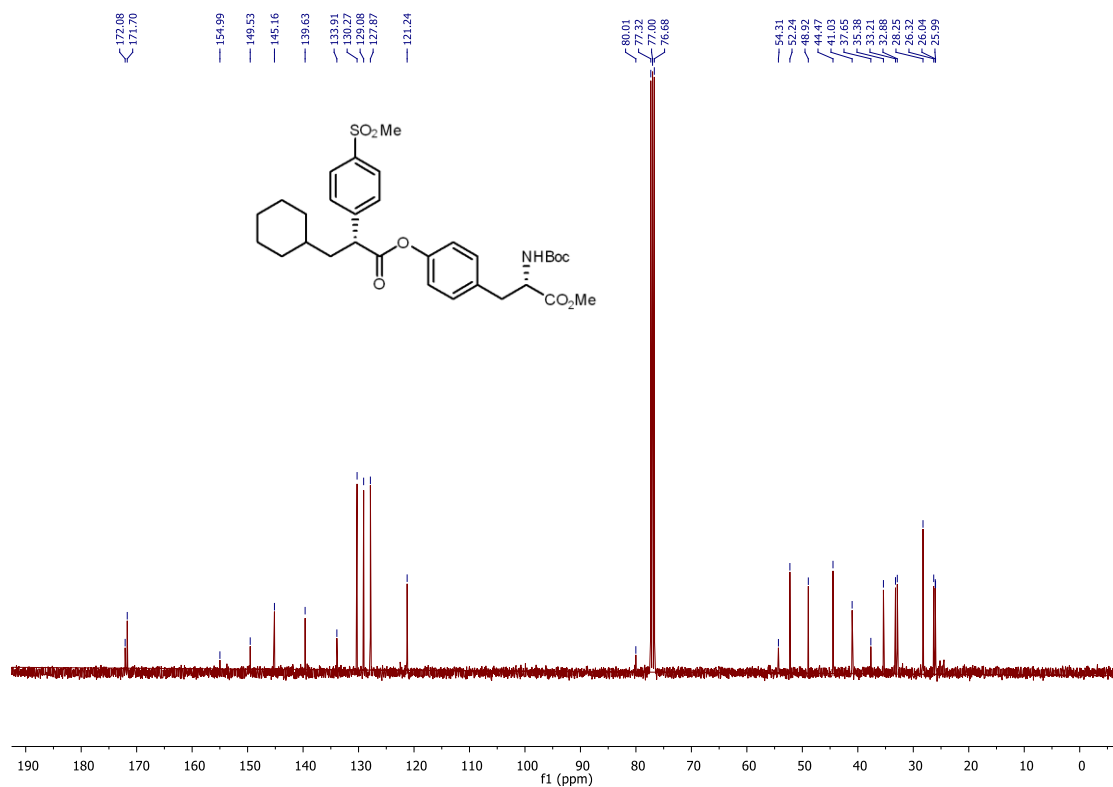

Supplementary Figure 174. <sup>13</sup>C NMR of compound 76.

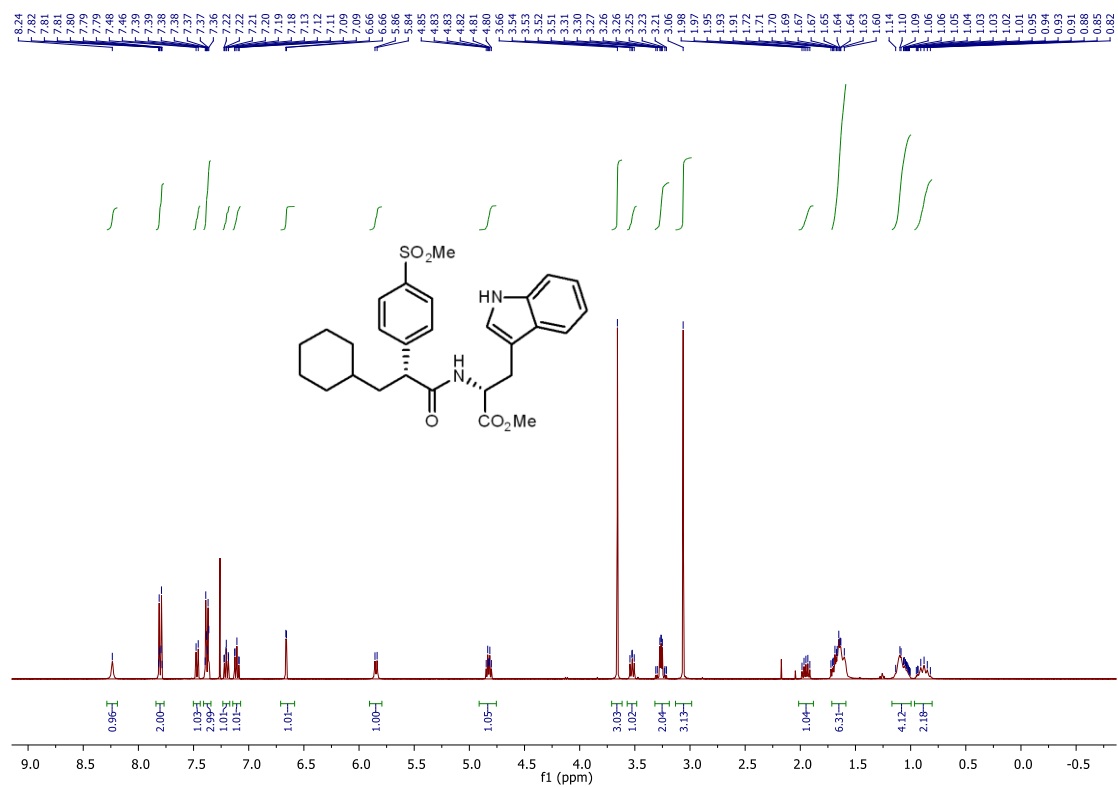

Supplementary Figure 175. <sup>1</sup>H NMR of compound 77.

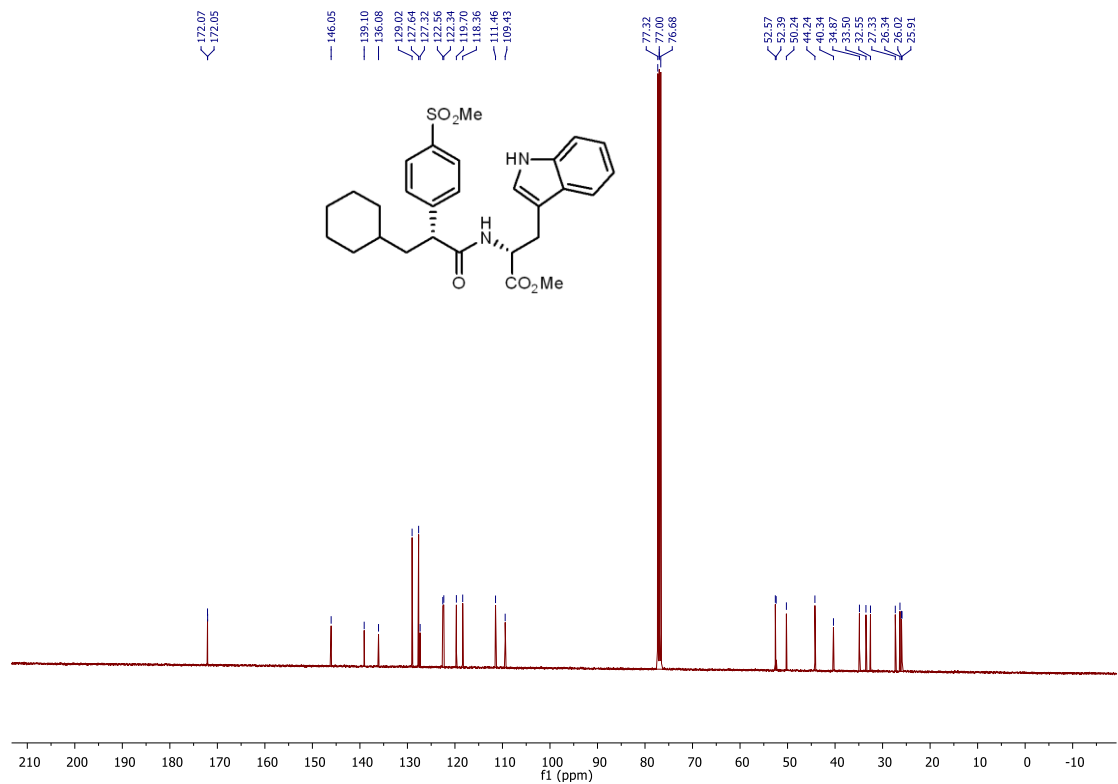

Supplementary Figure 176. <sup>13</sup>C NMR of compound 77.

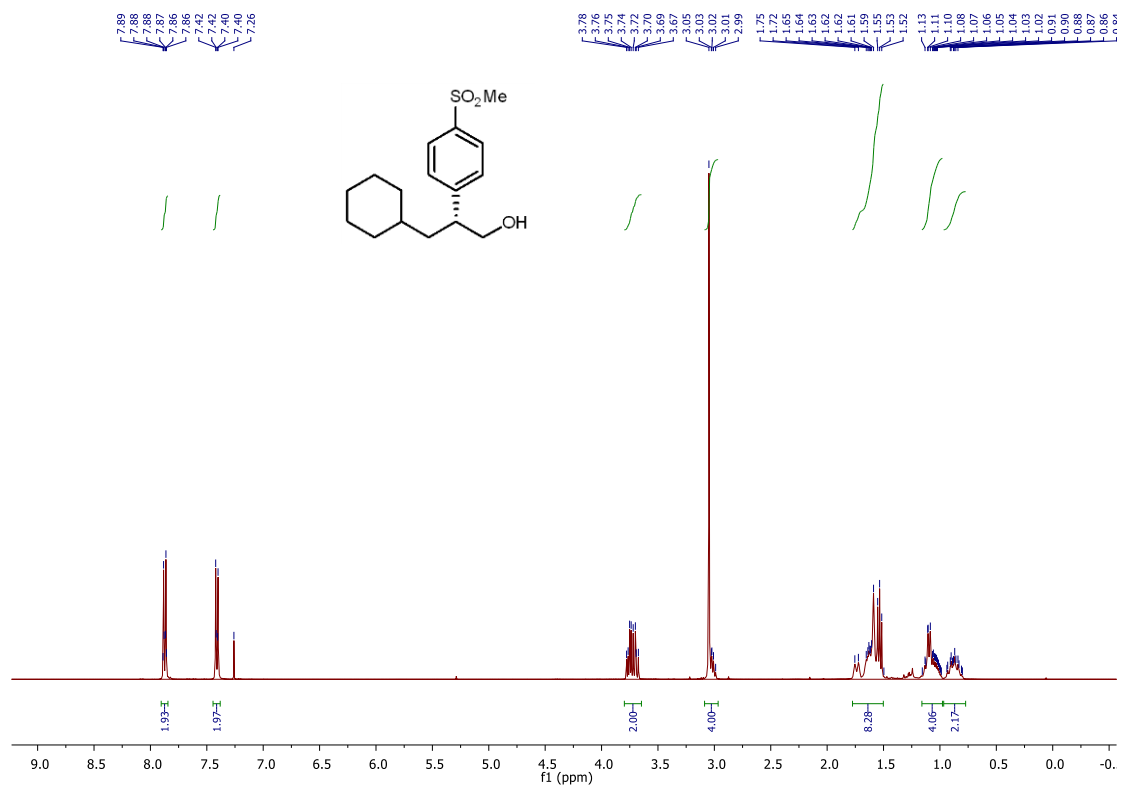

Supplementary Figure 177. <sup>1</sup>H NMR of compound 78.

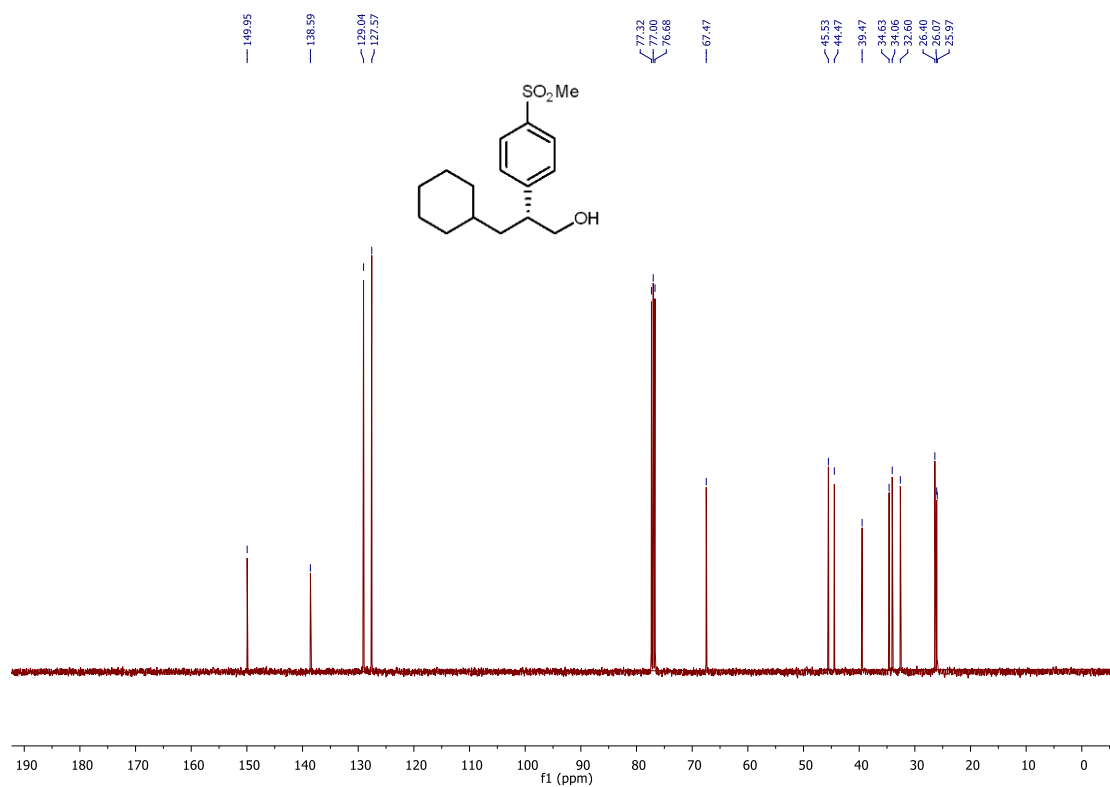

Supplementary Figure 178. <sup>13</sup>C NMR of compound 78.

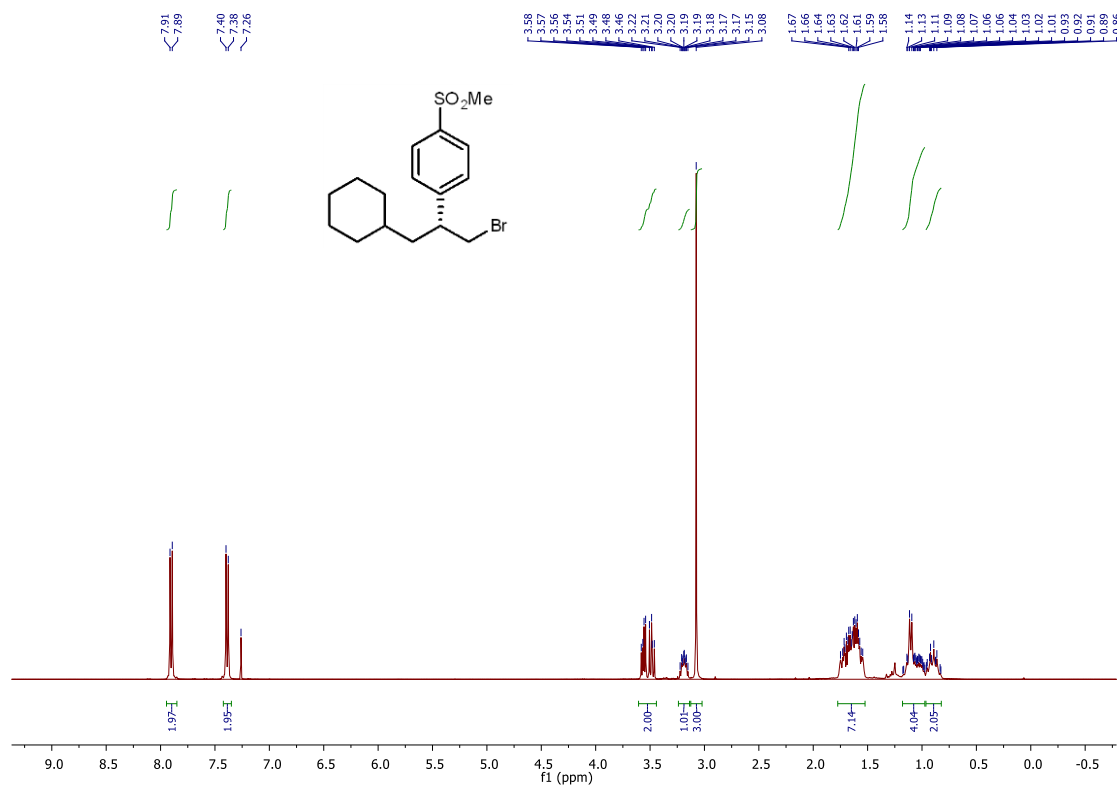

Supplementary Figure 179. <sup>1</sup>H NMR of compound 79.

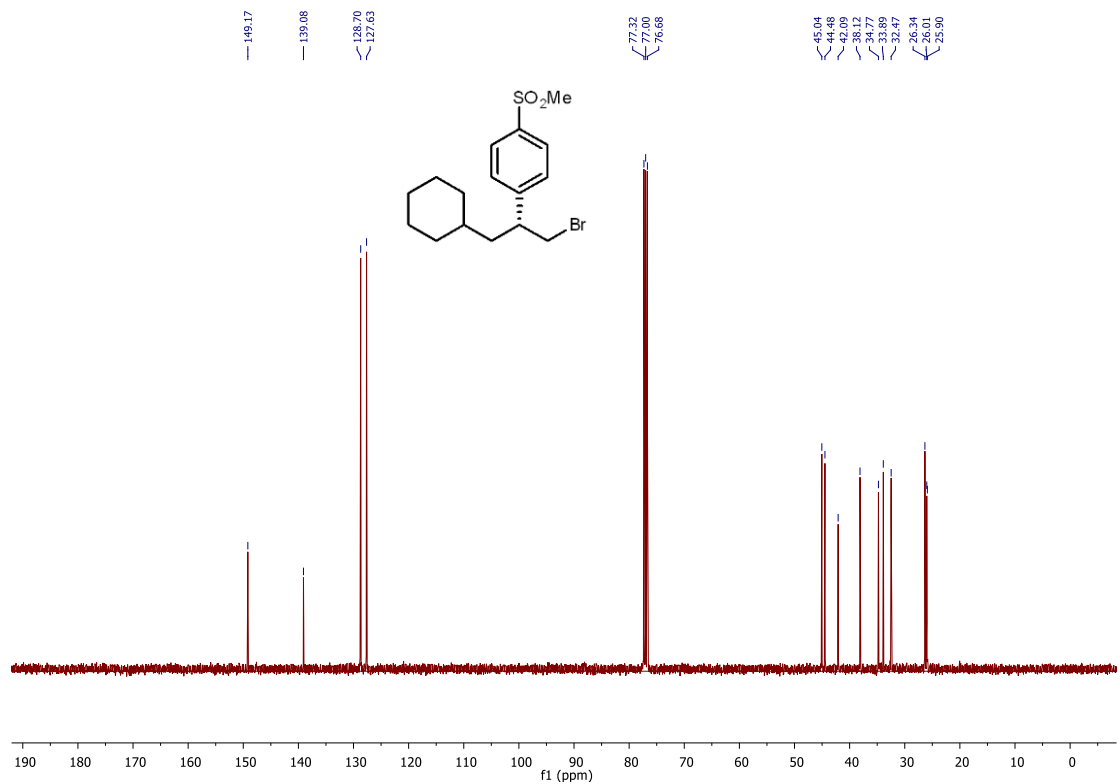

Supplementary Figure 180. <sup>13</sup>C NMR of compound 79.

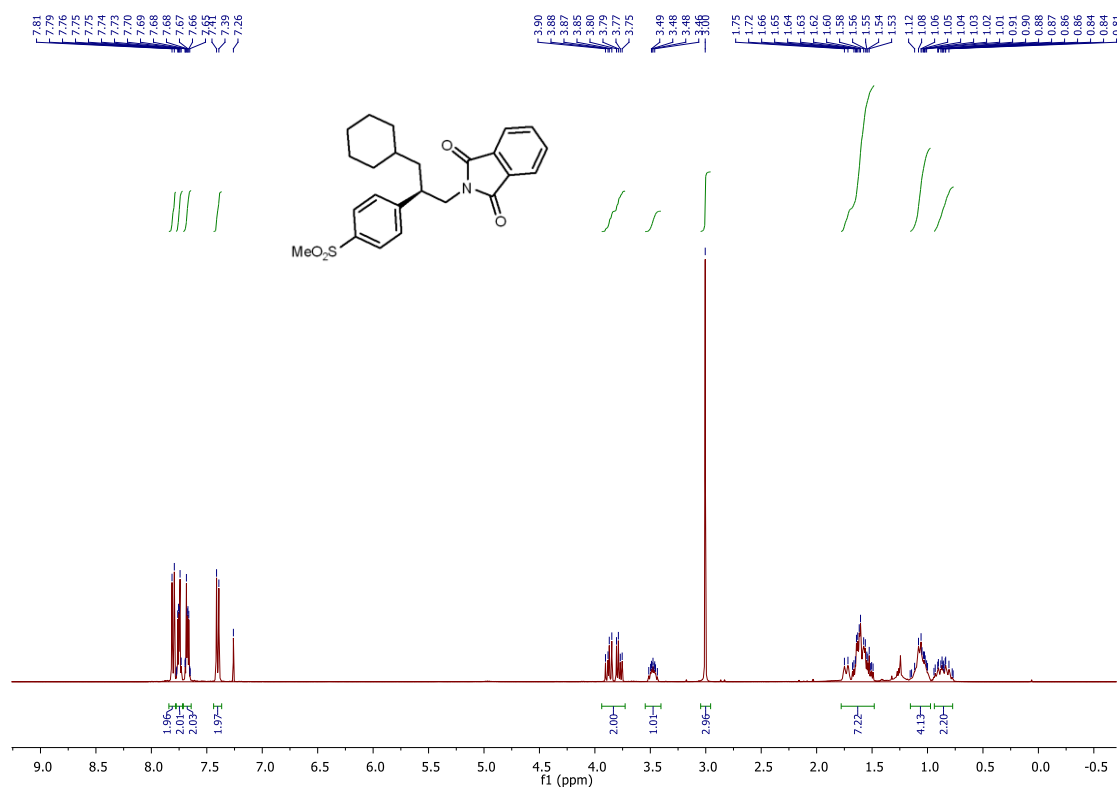

Supplementary Figure 181. <sup>1</sup>H NMR of compound 80.

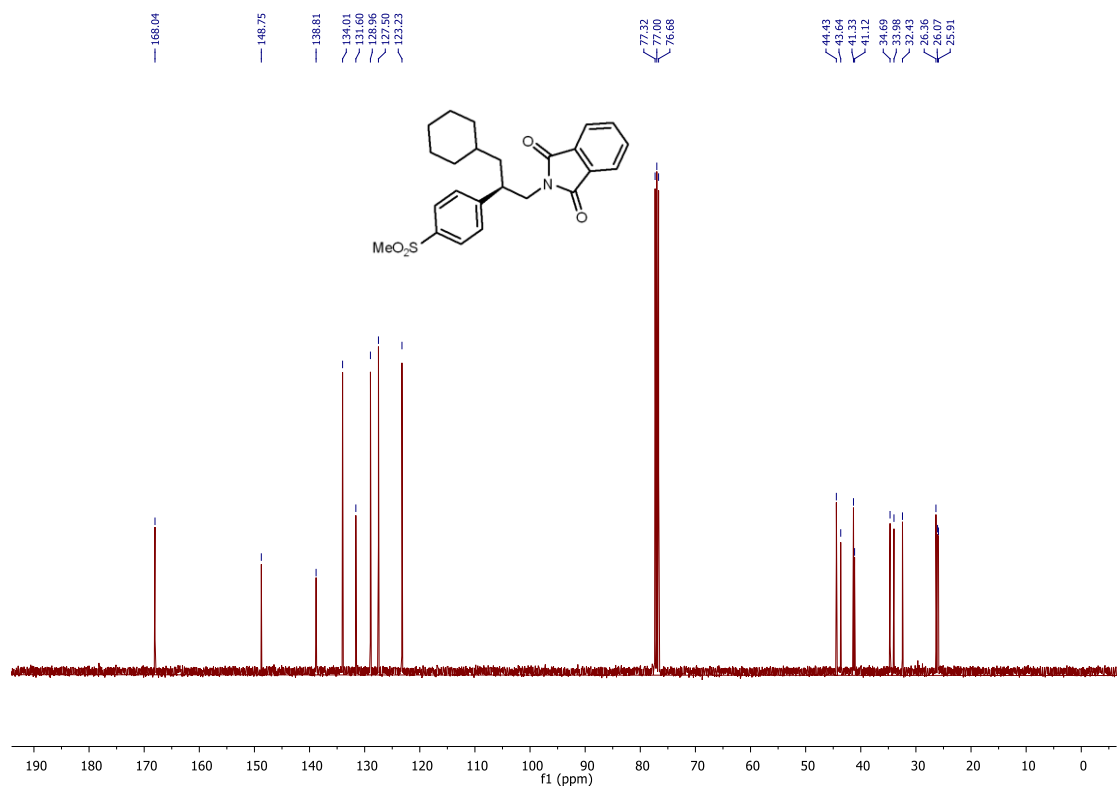

Supplementary Figure 182. <sup>13</sup>C NMR of compound 80.

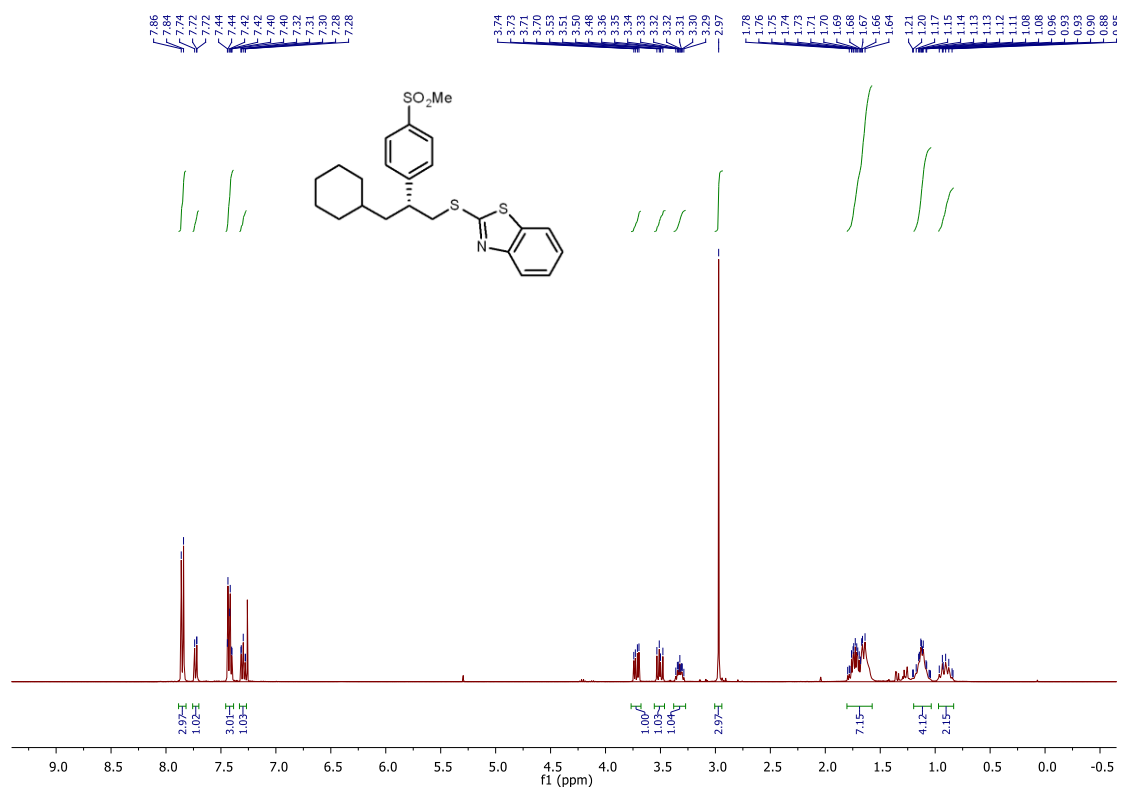

Supplementary Figure 183. <sup>1</sup>H NMR of compound 81.

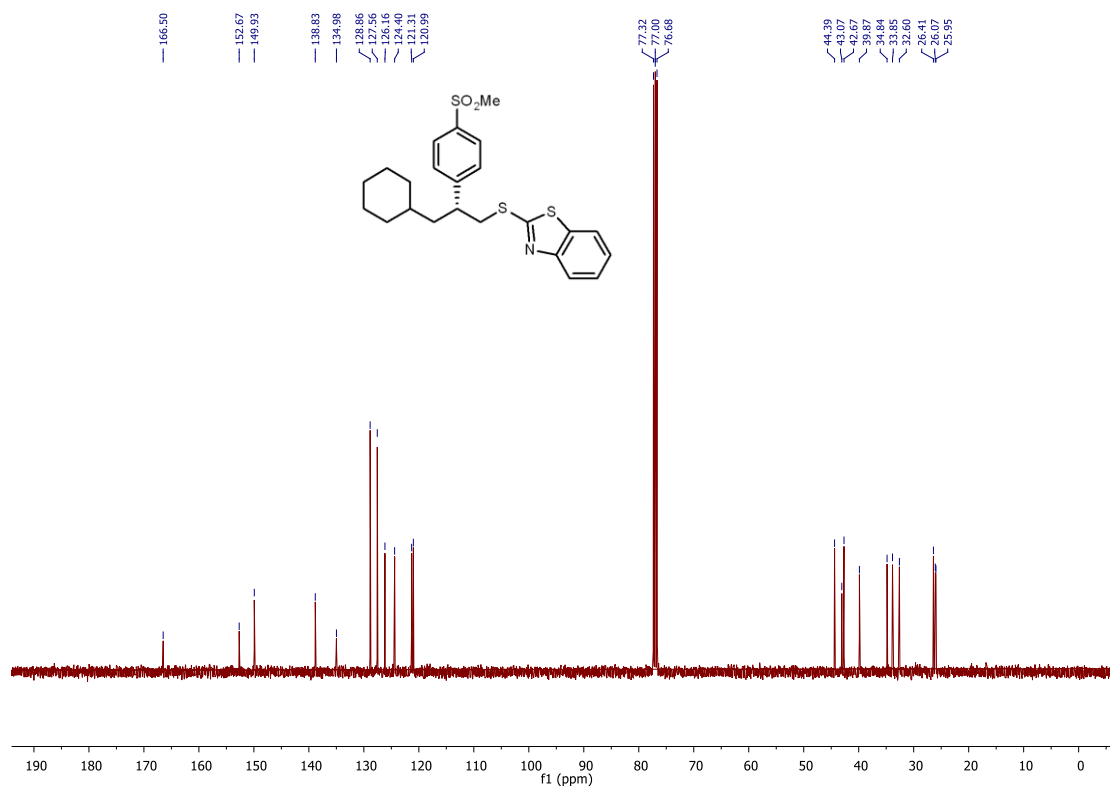

Supplementary Figure 184. <sup>13</sup>C NMR of compound 81.

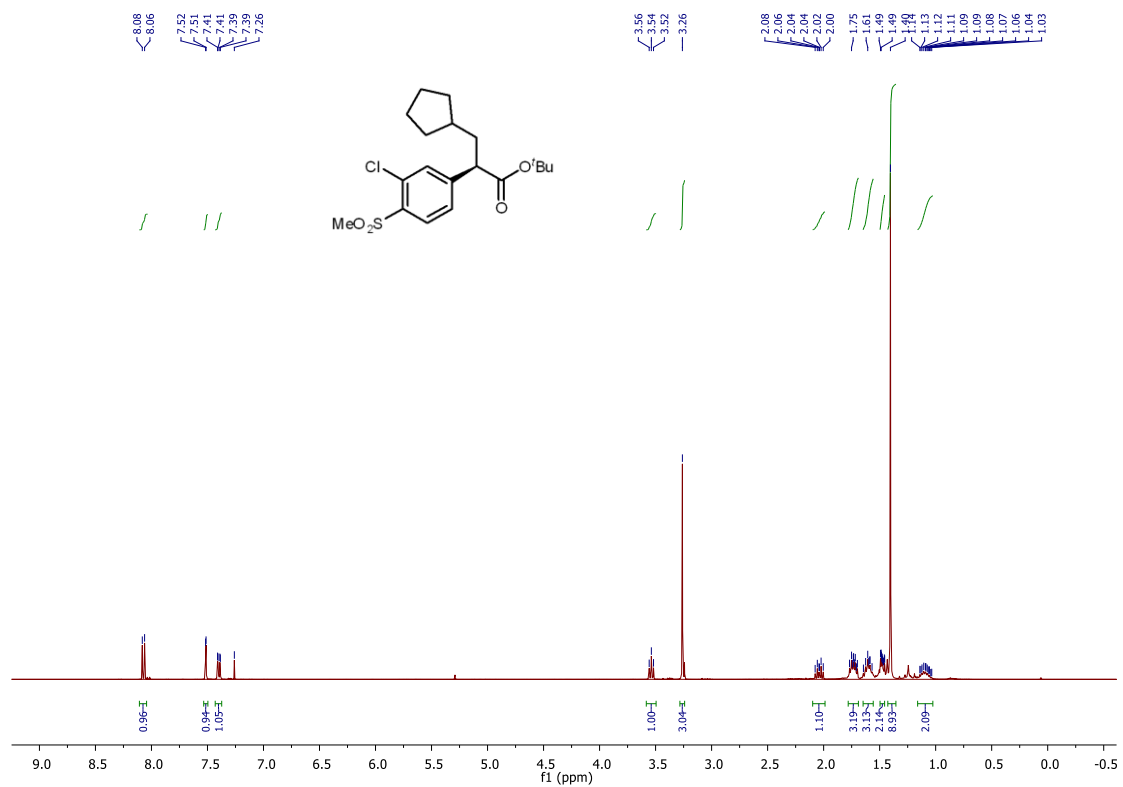

Supplementary Figure 185. <sup>1</sup>H NMR of compound 82.

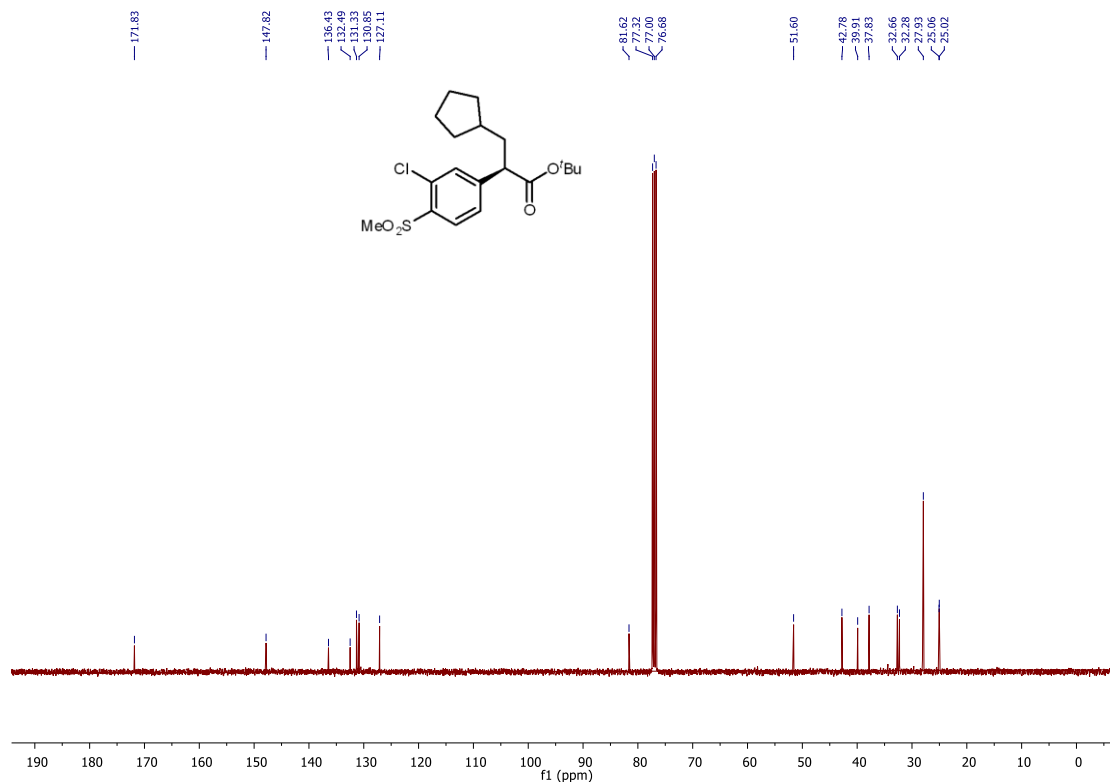

Supplementary Figure 186. <sup>13</sup>C NMR of compound 82.

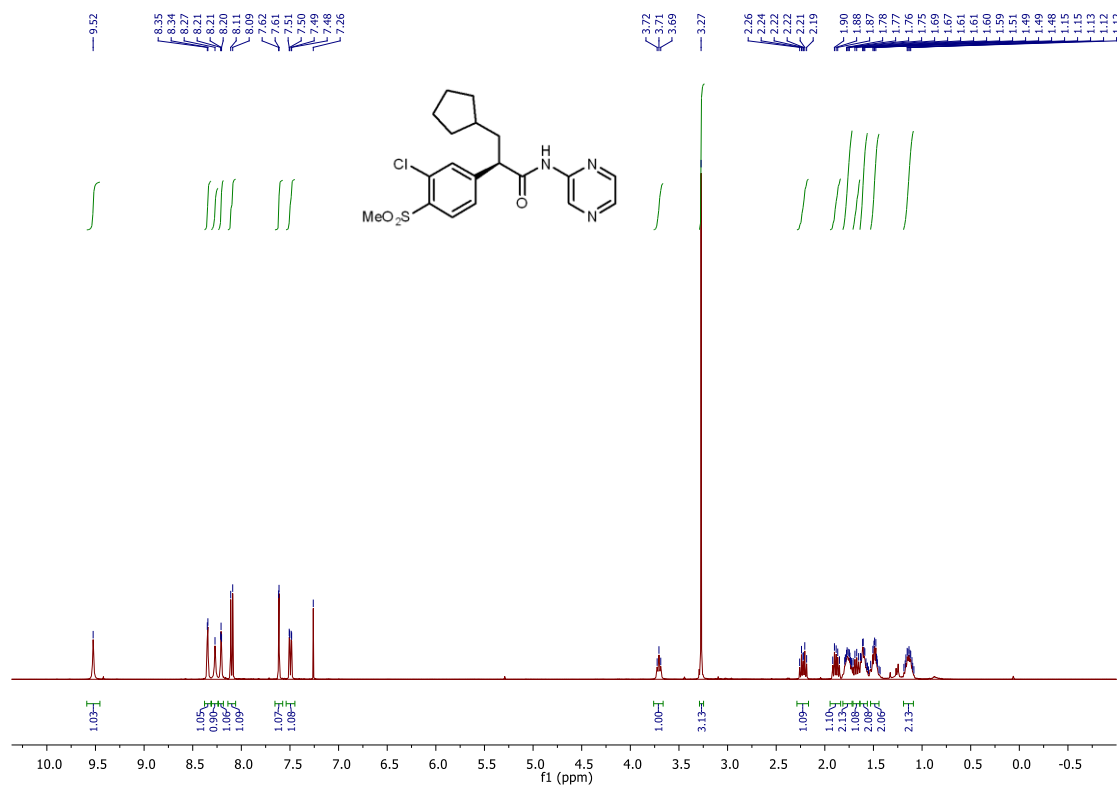

Supplementary Figure 187. <sup>1</sup>H NMR of compound 83.

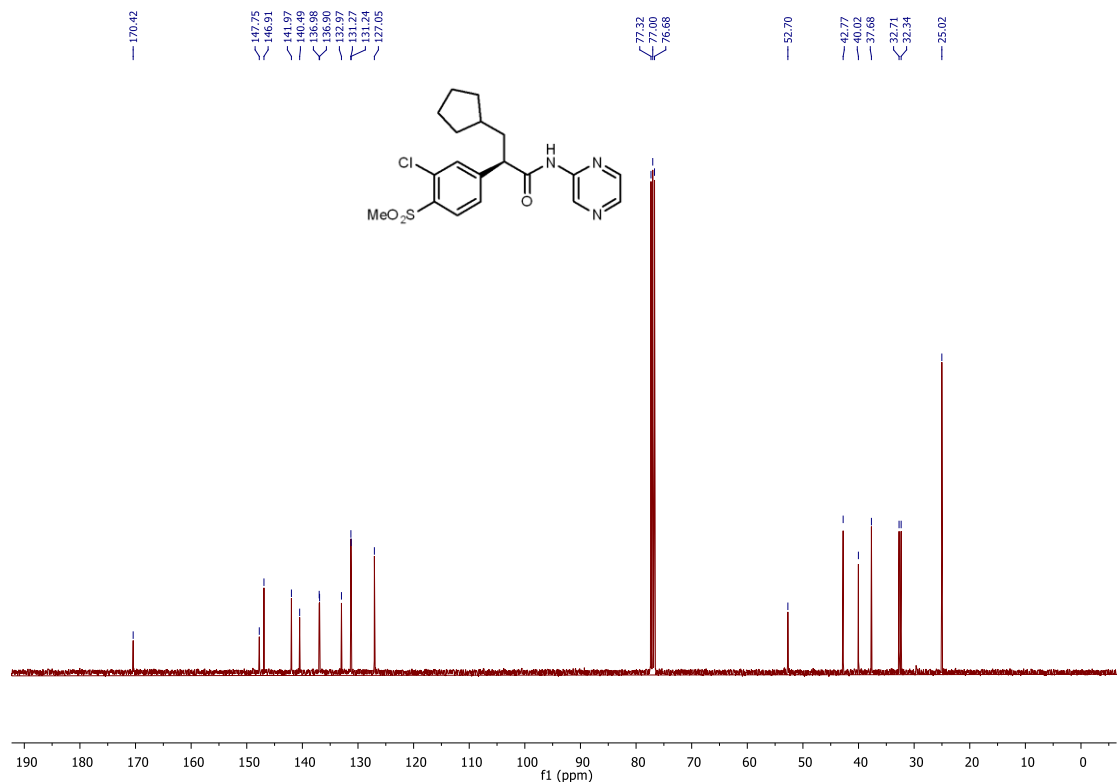

Supplementary Figure 188. <sup>13</sup>C NMR of compound 83.



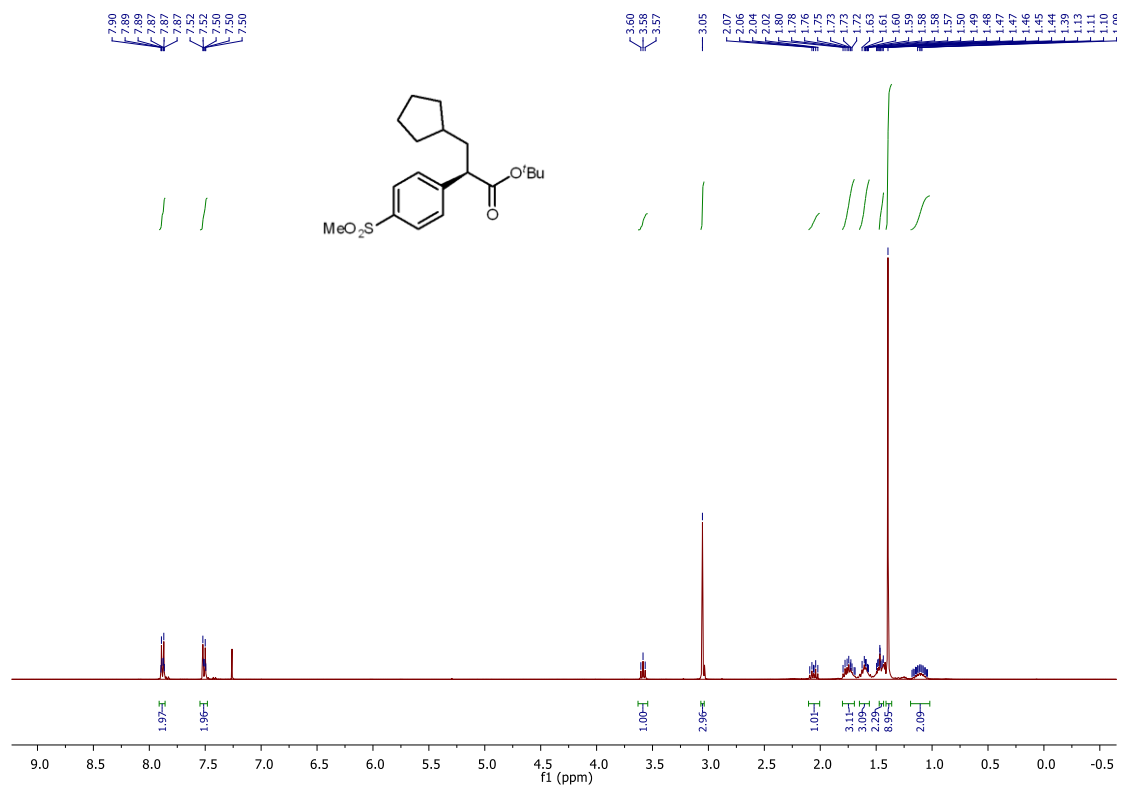

Supplementary Figure 189. <sup>1</sup>H NMR of compound 84.

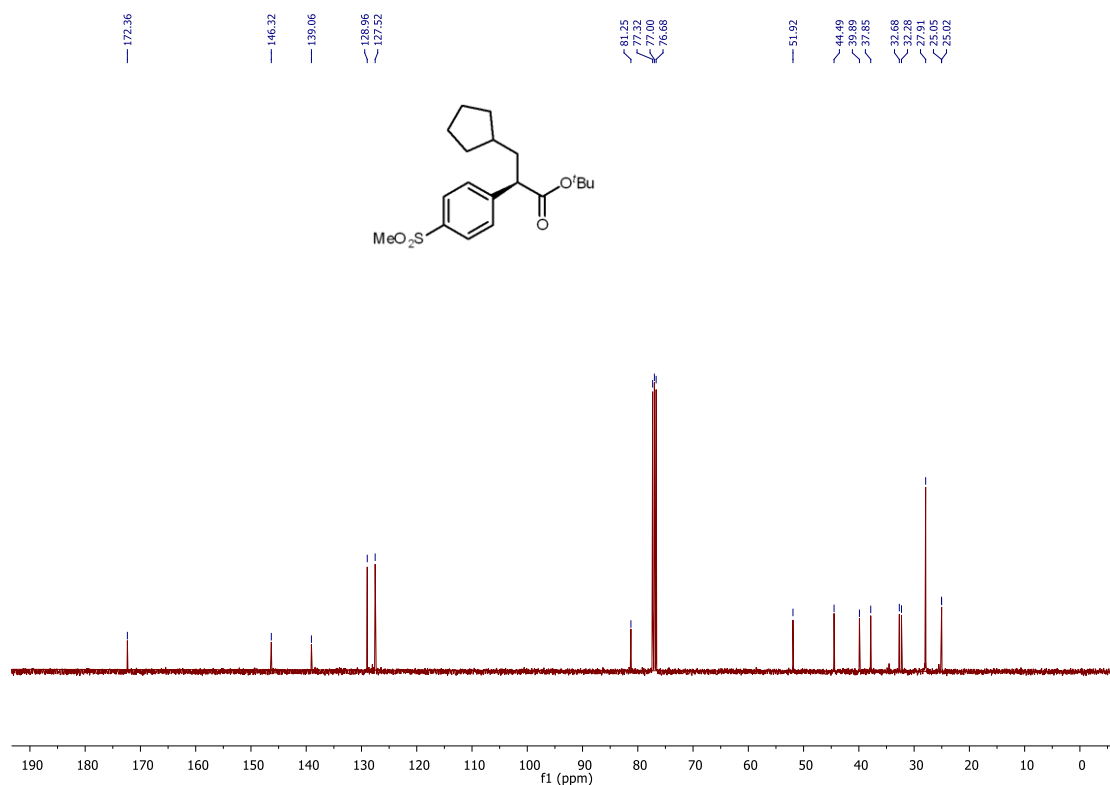

Supplementary Figure 190. <sup>13</sup>C NMR of compound 84.

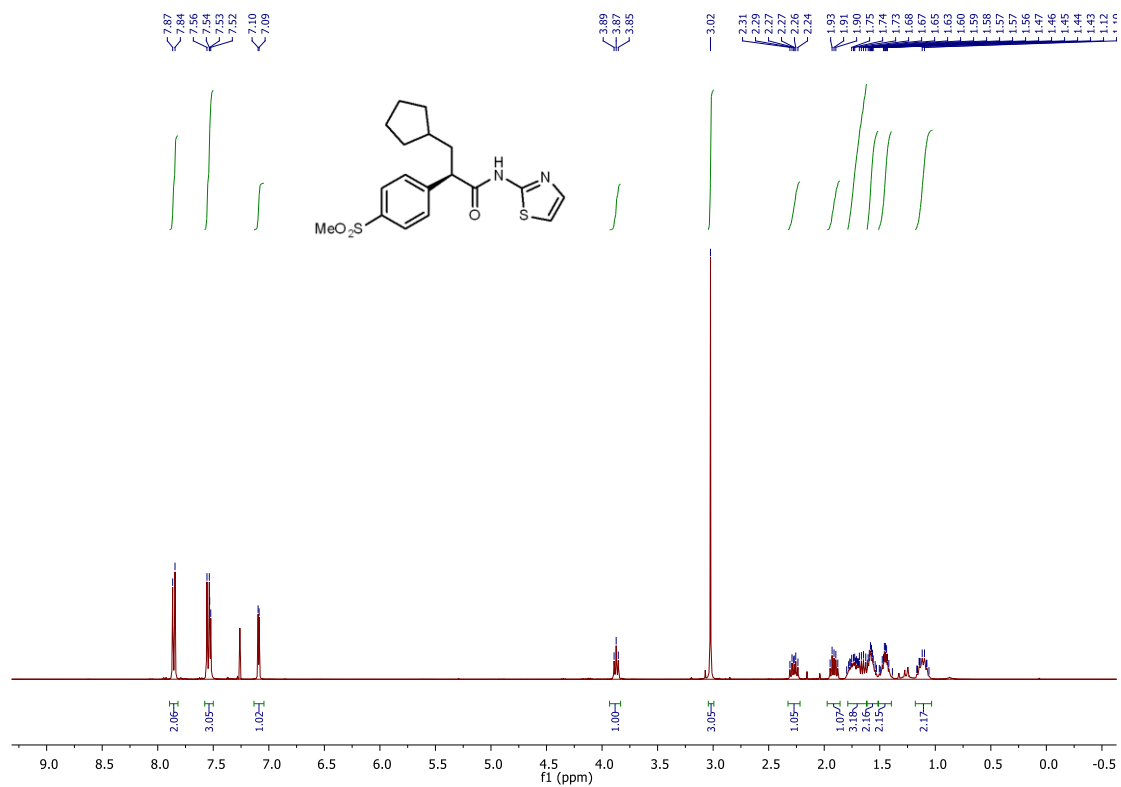

Supplementary Figure 191. <sup>1</sup>H NMR of compound 85.

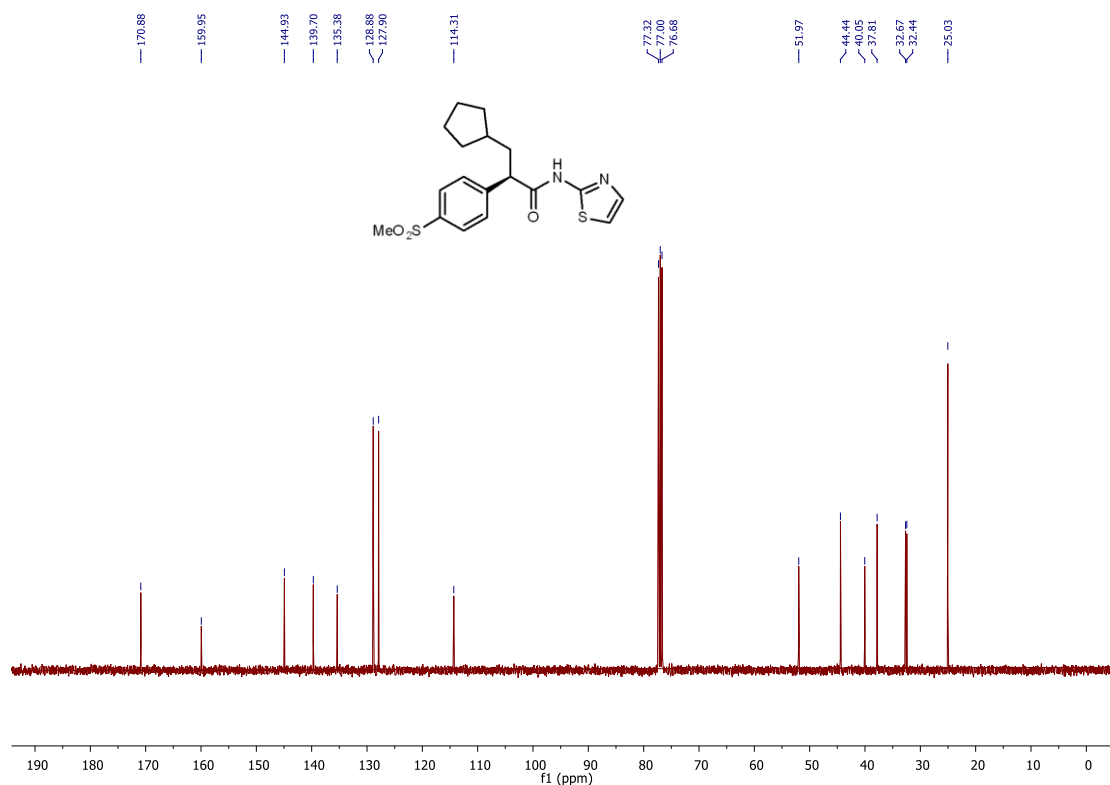

Supplementary Figure 192. <sup>13</sup>C NMR of compound 85.

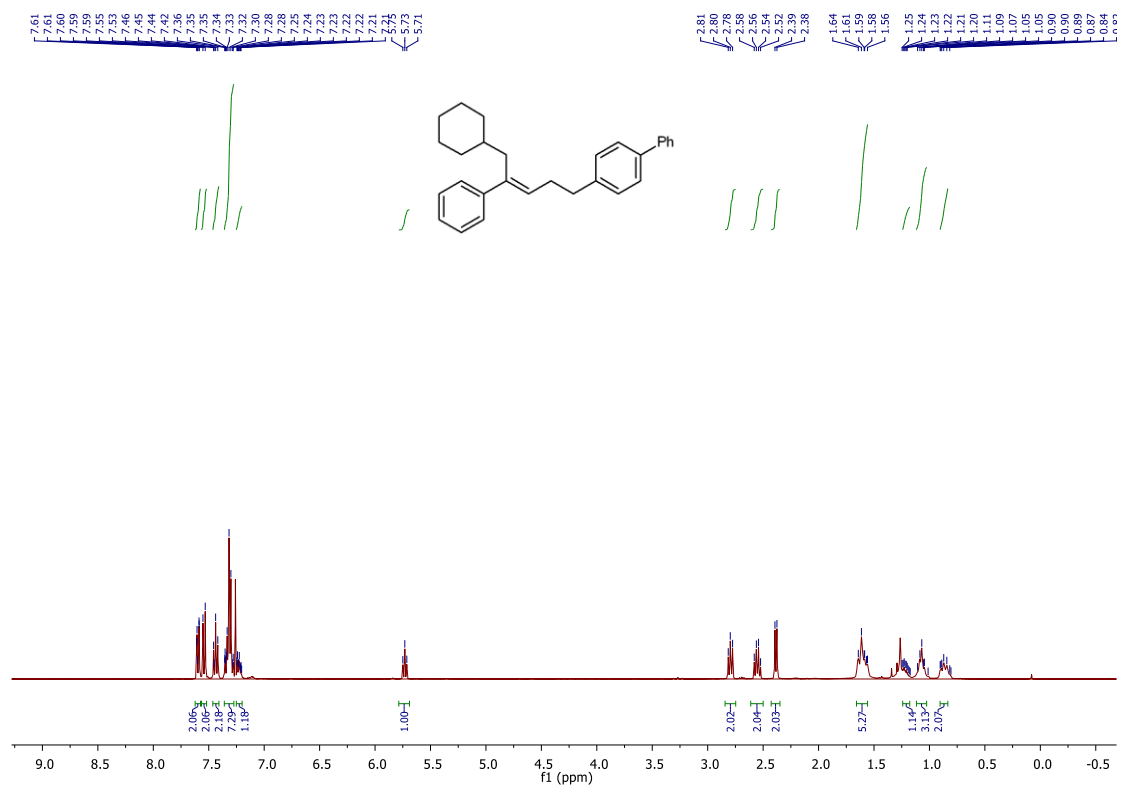

Supplementary Figure 193. <sup>1</sup>H NMR of compound 89.

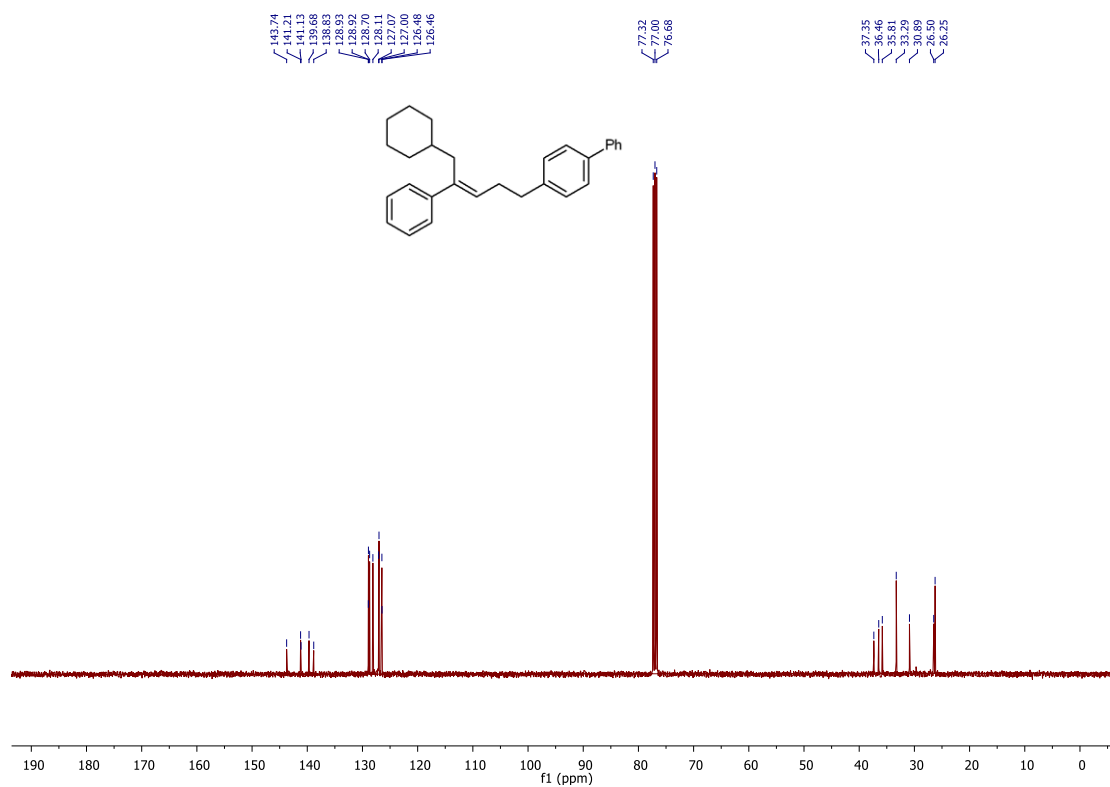

Supplementary Figure 194. <sup>13</sup>C NMR of compound 89.

## Supplementary References

1. Shu, X., Zhong, D., Lin, Y., Qin, X., Huo, H. Modular Access to Chiral alpha-(Hetero)aryl Amines via Ni/Photoredox-Catalyzed Enantioselective Cross-Coupling. *J. Am. Chem. Soc.* **144**, 8797-8806 (2022).
2. Espinoza, E. M., Clark, J. A., Soliman, J., Derr, J. B., Morales, M., Vullev, V. I. Practical Aspects of Cyclic Voltammetry: How to Estimate Reduction Potentials When Irreversibility Prevails. *J. Electrochem. Soc.* **166**, 3175-3187 (2019).
3. Clark, R. C.; Reid, J. S. The analytical calculation of absorption in multifaceted crystals. *Acta Cryst. A* **51**, 887-897 (1995).
4. CrysAlisPro (version 1.171.42.57a), Rigaku Oxford Diffraction Ltd, Yarnton, Oxfordshire, England (2022).
5. Dolomanov, O. V.; Bourhis, L. J.; Gildea, R. J.; Howard, J. A. K.; Puschmann, H. OLEX2: A complete structure solution, refinement and analysis program. *J. Appl. Cryst.*, **42**, 339-341 (2009).
6. Sheldrick, G. M. SHELXT - Integrated space-group and crystal-structure determination. *Acta Cryst. A* **71**, 3-8 (2015).
7. Sheldrick, G. M. Crystal structure refinement with SHELXL. *Acta Cryst. C* **71**, 3-8 (2015).
8. Spek, A. L. Structure validation in chemical crystallography. *Acta Cryst. D* **65**, 148-155 (2009).
